# Supplementary material for: Timeline of changes in spike conformational dynamics in emergent SARS-CoV-2 variants reveal progressive stabilization of trimer stalk with altered NTD dynamics
Source: eLife. 2023 Mar 17;12:e82584. doi: 10.7554/eLife.82584 (PMC10049203; doi:10.7554/eLife.82584)
Supplement: Figure 1—source data 1. [file elife-82584-fig1-data1.xlsx]

## Sheet: S Variant Mutations
		NTD	RBD	S1	S2
	Alpha	Δ69-70, Δ144	N501Y	A570D, D614G, P681H	T716L, S982A, D1118A
	Delta	T19R, Δ157-158	L452R, T478K	D614G, P681R	D950N
	Omicron (BA.1)	A67V, Δ69-70, T95I, ins214EPE, Δ211, L212I	G339D, S371L, S373P, S375F, K417N, N440K, G446S, S477N, T478K, N501Y, Y505H	T547K, D614G, H655Y, N679K, P681R	N764K, D796Y, N856K, Q954H, N969K, L981F
