# Supplementary material for: Timeline of changes in spike conformational dynamics in emergent SARS-CoV-2 variants reveal progressive stabilization of trimer stalk with altered NTD dynamics
Source: eLife. 2023 Mar 17;12:e82584. doi: 10.7554/eLife.82584 (PMC10049203; doi:10.7554/eLife.82584)
Supplement: Figure 2—source data 1. [file elife-82584-fig2-data1.xlsx]

## Sheet: WT inc vs. no inc
Sequence	Start	End	Modification	1	2	10
FTRGVYYPDKV	32	42		-0.0744	-0.1495	-0.1789
FTRGVYYPDKVFRSSVL	32	48		-0.6264	-0.5139	-0.6151
HSTQDL	49	54		0.0851	0.0743	0.0473
HSTQDLF	49	55		0.013	0.0149	0.0344
PFNDGVY	85	91		-0.0652		-0.0378
FASTEKSNIIRG	92	103		-0.2017	-0.1697	-0.1347
STEKSNIIRG	94	103		-0.4334	-0.3564	-0.2715
FASTEKSNIIRGWIF	92	106		0.0768	0.1098	0.1361
FASTEKSNIIRGWIFGTTL	92	110		-0.1226	0.0176	0.0247
DSKTQSL	111	117		0.0417	-0.012	-0.0175
DSKTQSLL	111	118		0.0407	0.1034	0.0188
MDLEGKQGNFKNLRE	177	191		-0.1753	-0.2246	-0.2804
EGKQGNFKNLRE	180	191		-0.6922	-0.4058	-0.4061
FVFKNIDG	192	199		-0.119	-0.1692	-0.1473
FVFKNIDGY	192	200		0.1227	-0.0116	-0.019
FVFKNIDGYF	192	201		0.055	-0.0074	0.0193
KNIDGYF	195	201		-0.4252	-0.1217	-0.0036
YFKIYSKHTPINL	200	212		-0.0717	-0.0956	-0.082
FKIYSKHTPINL	201	212		0.0125	0.059	0.1706
KIYSKHTPINL	202	212		-0.0704	-0.1387	-0.0773
VRDLPQGF	213	220		-0.0855	-0.0751	0.012
SALEPLVD	221	228		0.0328	0.0055	-0.0882
YYVGYLQPRTFL	265	276		0.149	0.1139	0.0359
YVGYLQPRTFL	266	276		0.2288	0.149	0.0802
VGYLQPRTFL	267	276		0.0553	0.0994	-0.144
YLQPRTFL	269	276		0.2107	0.1061	0.0028
FTVEKGIY	306	313		-0.0838	-0.0937	-0.4924
FTVEKGIYQTSN	306	317		-0.1234	-0.1597	-0.5745
FTVEKGIYQTSNF	306	318		0.2908	0.0182	-0.3009
QTSNF	314	318		0.1804	0.0532	-0.0762
YNSASF	369	374		-0.1975	-0.1905	-0.1091
NDLCF	388	392		-0.3026	-0.3591	-0.3419
FVIRGDE	400	406		-0.0158	-0.0539	0.0207
VIRGDEVRQIAPGQTGKIAD	401	420		-0.2608	-0.4825	-0.742
FVIRGDEVRQIAPGQTGKIADYN	400	422		0.3788	0.0015	-0.2274
VIRGDEVRQIAPGQTGKIADYN	401	422		-0.207	-0.3913	-0.2677
VRQIAPGQTGKIADY	407	421		-0.0226	-0.0817	-0.0891
VRQIAPGQTGKIADYN	407	422		-0.129	-0.1618	-0.1817
NYKLPDDF	422	429		0.0253	0.1736	0.0531
YNYKLPDDFTG	421	431		0.069	-0.0232	-0.0617
YKLPDDF	423	429		-0.0272	0.0181	0.0493
YKLPDDFTG	423	431		-0.8161	-0.7221	-0.6735
DSKVGGNYNYL	442	452		-0.7877	-0.5951	-0.5791
YRLFRKSNLKPFERD	453	467		0.0522	0.1872	-0.0343
FRKSNLKPFERD	456	467		0.0909	0.1268	0.1373
FRKSNLKPFERDIST	456	470		0.1205	0.0394	0.0724
FRKSNLKPFERDISTE	456	471		0.2403	0.25	0.0908
YGFQPTNGVGYQPYRV	495	510		0.2933	0.3778	0.3898
VVLSF	511	515		-0.0087	-0.0196	-0.0093
ELLHAPATVCGPKKSTNL	516	533		-1.3909	-1.3462	-1.116
NGLTGTGVL	544	552		-0.0177	-0.0105	-0.0556
LTGTGVL	546	552		0.0599	0.0001	0.0377
TESNKKFLPFQQF	553	565		-0.7989	-0.5658	-0.169
TESNKKFLPFQQFGRD	553	568		-1.4041	-0.9795	-0.3603
IADTTDAVRDPQTL	569	582		-0.4402	-0.4872	-0.6384
AVRDPQTL	575	582		0.0368	-0.0448	-0.2144
AVRDPQTLE	575	583		-0.0594	-0.0522	-0.1454
VRDPQTL	576	582		-0.0456	-0.1081	-0.1862
VRDPQTLE	576	583		0.0806	0.059	-0.0175
DITPCSF	586	592		-0.3125	-0.1801	-0.3138
DQLTPTW	627	633		0.2823	-0.0163	-0.1873
RVYSTGSNVF	634	643		-0.0591	-0.2036	-0.2677
ASQSIIA	685	691		-0.1921	-0.3675	-0.7725
YTMSL	692	696		-0.4228	-0.395	-0.2906
TISVT	716	720		0.0097	0.0021	-0.0156
VTTEIL	719	724		-0.0706	-0.1011	-0.1034
EILPVSM	722	728		0.0494	0.0701	0.0334
LLQYGSF	750	756		-0.1859	-0.2383	-0.1927
LQYGSF	751	756		-0.0094	-0.1369	-0.2587
NRALTGIA	761	768		0.045	-0.211	-0.6122
IAVEQDKNTQEVF	767	779		0.0306	0.1047	0.0321
VEQDKNTQEVF	769	779		-0.0009	0.0458	0.0582
AQVKQIYKTPPIKD	780	793		-0.6966	-0.844	-0.7622
IEDLL	815	819		-0.0043	0.0009	-0.0342
LLFNKVTL	818	825		0.0722	0.0702	0.0816
FNKVTL	820	825		-0.0017	-0.015	-0.0058
FNKVTLADAGF	820	830		0.1695	0.2251	0.3415
ADAGF	826	830		-0.1091	-0.0564	-0.0525
TVLPPLL	856	862		-0.2442	-0.259	-0.1811
TVLPPLLT	856	863		-0.5835	-0.6526	-0.6107
IAQYTSAL	867	874		-0.2093	-0.52	-1.2484
YTSAL	870	874		-0.2015	-0.2597	-0.4311
LAGTITSG	875	882		-0.961	-1.1302	-1.2492
LQIPFA	891	896		-0.299	-0.3643	-0.366
MAYRF	899	903		-0.1029	-0.1809	-0.561
AYRFNGIGVTQ	900	910		-0.4422	-0.4712	-0.7403
MAYRFNGIGVTQNVL	899	913		-0.5967	-1.1206	-2.2199
AYRFNGIGVTQNVL	900	913		-0.788	-1.0911	-1.9645
YRFNGIGVTQNVL	901	913		-0.8184	-1.0382	-2.3266
NGIGVTQNVL	904	913		-0.6036	-0.7133	-1.3296
IGVTQNVL	906	913		-0.5216	-0.7013	-1.2131
YENQKL	914	919		-0.3303	-0.235	-0.136
IANQF	920	924		-0.0383	-0.0648	-0.1982
IANQFNSAIGKIQDSL	920	935		-0.2879	-0.3429	-0.1164
NSAIGKIQDSL	925	935		-0.1997	-0.0708	0.0832
IGKIQDSL	928	935		-0.3266	-0.3615	-0.3169
IGKIQDSLSSTASAL	928	942		-0.2144	0.101	-0.18
SSTASAL	936	942		-0.4422	-0.319	-0.3357
GKLQDVVNQNAQALNT	943	958		-1.3467	-1.0925	-0.8698
VVNQNAQALNT	948	958		-0.9882	-0.8344	-0.2433
LVKQLSSNF	959	967		-0.7254	-0.6232	-0.3805
VKQLSSNF	960	967		-1.2993	-0.9401	-0.6217
LVKQLSSNFGAISSVL	959	974		-2.4984	-2.6633	-1.7957
GAISSVL	968	974		-0.546	-0.3838	-0.2055
ILSRLDPPEAE	977	987		-1.3346	-1.0279	-0.183
SRLDPPEAE	979	987		-0.5809	-0.447	-0.0876
SRLDPPEAEVQ	979	989		-1.0364	-0.8048	-0.3953
VQIDRL	988	993		-0.7545	-0.7201	-0.7329
VQIDRLITGRL	988	998		-1.6706	-2.0957	-2.8478
IDRLITGRL	990	998		-0.5459	-0.9259	-1.3784
ITGRL	994	998		-0.3058	-0.4426	-0.4798
QSLQT	999	1003		0.1207	-0.0438	-0.0243
YVTQQL	1004	1009		0.1595	0.1399	0.0944
AEIRASANL	1013	1021		0.2307	0.0064	-0.2403
IRASANL	1015	1021		0.0664	-0.0464	-0.4057
MSFPQSAPHGVVF	1047	1059		0.2717	0.237	0.3598
MSFPQSAPHGVVFL	1047	1060		0.1654	0.1779	0.2194
FVTQRNFYEPQIITT	1100	1114		-0.0995	-0.2251	-0.1775
FYEPQIITT	1106	1114		-0.0679	-0.0164	0.048
FYEPQIITTDNT	1106	1117		-0.165	-0.2068	-0.2068
FKEEL	1145	1149		0.1918	0.2199	0.2625
QELGKYEQ	1198	1205		-0.166	-0.2202	-0.161
QELGKYEQY	1198	1206		-0.0938	-0.0178	-0.0412
GSGYI	1221	1225		-0.4102	-0.3933	-0.2728
YVRKDGEW	1235	1242		-0.1244	-0.069	-0.2155
VLLST	1243	1247		-0.4538	-0.1816	-0.1496
VLLSTF	1243	1248		-0.5191	-0.3646	-0.4361
