# Supplementary material for: Timeline of changes in spike conformational dynamics in emergent SARS-CoV-2 variants reveal progressive stabilization of trimer stalk with altered NTD dynamics
Source: eLife. 2023 Mar 17;12:e82584. doi: 10.7554/eLife.82584 (PMC10049203; doi:10.7554/eLife.82584)
Supplement: Figure 2—source data 2. [file elife-82584-fig2-data2.xlsx]

## Sheet: WT6P_minus_2P
				WT 6P minus WT 2P (Da)
Peptide Number	Sequence	Start	End	1 min	2 min	10 min
1	RTQLPPAYTNS	21	31	-0.1187	-0.0618	-0.101
2	FTRGVYYPDKV	32	42	0.0257	-0.007	-0.1556
3	FTRGVYYPDKVF	32	43	0.0452	0.0165	-0.0881
4	VYYPDKVF	36	43	-0.0326	0.1159	-0.0967
5	FTRGVYYPDKVFRSSVL	32	48	-0.0557	0.0014	-0.1344
6	VYYPDKVFRSSVL	36	48	0.038	-0.0905	-0.1274
7	FRSSVL	43	48	0.0582	0.012	-0.1124
8	HSTQDLF	49	55	0.0362	0.0572	0.085
9	FASTEKSNIIRG	92	103	0.218	0.1571	0.0525
10	ASTEKSNIIRG	93	103	0.1593	0.1058	0.1271
11	STEKSNIIRG	94	103	0.0895	0.0867	0.0583
12	FASTEKSNIIRGWIF	92	106	0.2074	0.0796	0.2532
13	FASTEKSNIIRGWIFGTTL	92	110	0.0475	0.1114	0.0864
14	WIFGTTL	104	110	0.0561	0.0598	0.1025
15	GTTLDSKTQSL	107	117	0.0154	-0.0353	0.1389
16	DSKTQSL	111	117	0.1087	0.0585	0.0494
17	DSKTQSLL	111	118	0.0339	0.0283	-0.0656
18	YVSQPFL	170	176	0.0831	0.1077	0.0773
19	MDLEGKQGNF	177	186	0.1276	0.0588	-0.1921
20	MDLEGKQGNFKNLRE	177	191	0.1303	0.1009	-0.0989
21	FVFKNIDG	192	199	0.0868	0.0659	-0.0711
22	FVFKNIDGY	192	200	-0.0437	-0.0189	0.0163
23	FVFKNIDGYF	192	201	0.0829	0.043	-0.0711
24	KNIDGYF	195	201	0.0751	0.135	0.1313
25	FKIYSKHTPINL	201	212	0.0714	0.0279	-0.0787
26	KIYSKHTPINL	202	212	0.0297	-0.0047	-0.1577
27	VRDLPQGF	213	220	0.0989	0.1116	-0.037
28	SALEPLVD	221	228	-0.001	-0.0105	0.0039
29	TRFQTL	236	241	-0.1523	-0.1559	-0.0154
30	HRSYLTPGDSSSGWTAGAAA	245	264	0.1572	0.0883	-0.192
31	WTAGAAA	258	264	-0.0056	-0.0118	-0.2421
32	YYVGYLQPRTFL	265	276	0.0491	0.017	0.07
33	YVGYLQPRTFL	266	276	0.0522	0.0411	0.0584
34	VGYLQPRTFL	267	276	0.0821	0.1009	0.0515
35	YLQPRTFL	269	276	0.0351	0.0667	0.0272
36	FTVEKGIY	306	313	0.0482	0.0086	0.0872
37	FTVEKGIYQTSN	306	317	0.0329	0.0947	-0.1585
38	KGIYQTSNF	310	318	0.1202	0.1233	-0.0617
39	QTSNF	314	318	0.0679	0.0251	-0.0734
40	FRVQPTES	318	325	0.0646	-0.0023	-0.2156
41	YNSASF	369	374	0.0661	0.0599	-0.1092
42	NDLCF	388	392	-0.046	-0.0429	-0.0815
43	YADSF	396	400	0.0191	0.0287	0.0171
44	FVIRGDE	400	406	-0.0029	-0.0213	-0.0158
45	VIRGDEVRQIAPGQTGKIAD	401	420	0.1268	0.1133	0.0023
46	VIRGDEVRQIAPGQTGKIADYN	401	422	0.0662	-0.1044	0.0529
47	VRQIAPGQTGKIAD	407	420	0.1164	0.0621	-0.1774
48	VRQIAPGQTGKIADY	407	421	0.1658	0.1108	0.028
49	VRQIAPGQTGKIADYN	407	422	0.1159	0.0659	0.0069
50	YNYKLPDDF	421	429	0.0936	0.0864	-0.0037
51	YNYKLPDDFTG	421	431	0.135		-0.1296
52	YKLPDDF	423	429	0.0307	0.0534	-0.0331
53	DSKVGGNYNYL	442	452	0.0501	0.0697	-0.3232
54	SKVGGNYNYL	443	452	0.0193	0.0107	-0.023
55	KVGGNYNYL	444	452	0.0758	0.131	-0.1417
56	YRLFRKSNLKPFERD	453	467	0.0662	0.0526	0.0537
57	FRKSNLKPFERD	456	467	0.0749	0.0294	0.053
58	FRKSNLKPFERDIST	456	470	0.163	0.1594	0.1487
59	FRKSNLKPFERDISTE	456	471	0.2018	0.1135	-0.0577
60	YGFQPTNGVGYQPYRVVV	495	512	0.7514	0.552	0.2185
61	VGYQPYRVVV	503	512	0.0781	0.0423	0.0566
62	ELLHAPATVCGPKKSTNL	516	533	0.2175	0.0793	-0.0443
63	NFNGLTGTGVL	542	552	0.1155	0.0841	0.0034
64	LTGTGVL	546	552	0.0541	0.0601	-0.0004
65	TESNKKFLPFQQF	553	565	0.0709	0.0559	-0.2764
66	IADTTD	569	574	-0.0246	-0.0602	-0.2436
67	IADTTDAVRDPQTLE	569	583	-0.1308	-0.1604	-0.1612
68	AVRDPQTL	575	582	0.1092	0.0826	-0.0133
69	AVRDPQTLE	575	583	0.0424	0.0668	0.0993
70	VRDPQTL	576	582	0.0122	0.0074	-0.0042
71	AVRDPQTLEI	575	584	0.0463	0.0348	0.0829
72	DITPCSF	586	592	-0.0276	0.0171	0.0142
73	DQLTPTW	627	633	0.1674	0.0642	-0.0013
74	DQLTPTWRV	627	635	0.1777	0.0854	0.0348
75	RVYSTGSNVF	634	643	0.175	0.0616	-0.1168
76	CDIPIGAGIC	662	671	0.033	-0.0457	-0.1497
77	VASQSIIA	687	694	-0.0165	0.0162	-0.0655
78	ASQSIIA	688	694	0.2165	-0.0468	-0.0897
79	SIIAY	691	695	0.0057	-0.0446	-0.0152
80	YTMSL	695	699	0.0141	0.0151	-0.0055
81	TISVT	719	723	0.0621	0.0561	-0.0061
82	VTTEIL	722	727	-0.1402	-0.0777	-0.1281
83	TEILPVS	724	730	-0.0083	-0.1089	-0.0369
84	TEILPVSM	724	731	0.0041	-0.0141	-0.0478
85	EILPVSM	725	731	-0.01	-0.0186	0.0547
86	LLQYGSF	753	759	0.0865	0.0218	-0.0897
87	LQYGSF	754	759	0.0477	0.0028	-0.1599
88	NRALTGIA	764	771	0.0187	0.0112	-0.025
89	IAVEQDKNTQEVF	770	782	0.0718	0.0154	0.1033
90	VEQDKNTQEVF	772	782	0.026	0.0703	0.0677
91	QDKNTQEVF	774	782	-0.0288	0.0158	0.0957
92	AQVKQIYKTPPIKD	783	796	0.0997	-0.002	-0.1948
93	IEDLL	818	822	-0.004	0.0122	-0.0418
94	LLFNKVTL	821	828	0.1476	0.1183	0.0362
95	LFNKVTL	822	828	0.1079	0.0557	-0.1331
96	FNKVTL	823	828	0.0283	0.0095	-0.1333
97	LFNKVTLADAGF	822	833	0.2151	0.2471	-0.129
98	FNKVTLADAG	823	832	0.1219	0.0805	-0.1505
99	FNKVTLADAGF	823	833	0.1847	0.0927	-0.1221
100	ADAGF	829	833	0.0373	0.0292	-0.1108
101	TVLPPLL	859	865	0.0491	0.0389	0.0482
102	TVLPPLLT	859	866	-0.0439	-0.0166	0.0064
103	IAQYTSAL	870	877	-0.012	-0.0128	0.1294
104	YTSAL	873	877	0.0074	0.0042	-0.0049
105	YTSALL	873	878	0.0588	-0.0251	0.0863
106	LAGTITSG	878	885	-0.0451	-0.032	-0.035
107	WTFGAG	886	891	0.0522	0.0069	-0.0663
108	WTFGAGAA	886	893	0.1822	0.1741	-0.0311
109	MAYRF	902	906	0.079	0.0727	0.0697
110	MAYRFNGIGVTQNVL	902	916	-0.0806	-0.1113	-0.5594
111	AYRFNGIGVTQNVL	903	916	0.1604	0.0708	0.2538
112	YRFNGIGVTQNVL	904	916	0.1896	0.1041	0.0708
113	NGIGVTQ	907	913	0.1015	0.0193	0.0333
114	IGVTQNVL	909	916	-0.0151	-0.0052	-0.0876
115	VTQNVL	911	916	0.0619	0.026	-0.0166
116	YENQKL	917	922	0.0195	0.029	0.0407
117	YENQKLIA	917	924	0.0082	0.0056	0.0382
118	IANQF	923	927	-0.0339	-0.0303	-0.0125
119	IANQFNSA	923	930	0.0398	0.0145	0.1366
120	IANQFNSAIGKIQDSL	923	938	0.1553	0.0867	0.1663
121	NQFNSAIGKIQDSL	925	938	0.1322	0.2911	0.2613
122	NSAIGKIQD	928	936	0.0096	0.0243	-0.0332
123	NSAIGKIQDSL	928	938	0.1457	0.1498	0.0679
124	IGKIQDSL	931	938	0.0755	0.0828	-0.0353
125	GKLQDVVNQ	946	954	-0.0975	-0.1123	-0.0954
126	GKLQDVVNQNA	946	956	0.0176	0.0383	-0.0806
127	KLQDVVNQN	947	955	-0.0425	0.0478	0.0817
128	GKLQDVVNQNAQALNT	946	961	0.0214	0.0672	0.0523
129	VVNQNAQALNT	951	961	0.0074	0.0251	-0.0375
130	LVKQLSSNF	962	970	-0.0234	0.017	0.0222
131	VKQLSSNF	963	970	-0.1078	-0.0699	-0.0907
132	LVKQLSSNFGAISSVL	962	977	-0.3544	-0.2349	0.4692
133	GAISSVL	971	977	-0.0437	0.0015	-0.0015
134	VQIDRL	991	996	-0.056	-0.0371	-0.008
135	IDRLITGRL	993	1001	-0.0906	-0.1198	-0.0349
136	ITGRL	997	1001	-0.0231	-0.0608	0.022
137	QSLQT	1002	1006	0.0824	-0.0448	0.1022
138	YVTQQL	1007	1012	-0.0441	-0.0438	-0.0584
139	AEIRASANL	1016	1024	0.0714	0.0688	0.1249
140	IRASANL	1018	1024	0.0814	0.0544	0.0767
141	MSFPQSAPHGVVF	1050	1062	0.0644	0.0254	0.0585
142	MSFPQSAPHGVVFL	1050	1063	0.1168	-0.025	0.0446
143	PQSAPHGVVF	1053	1062	0.1099	0.0305	-0.0182
144	PREGVF	1090	1095	0.0659	0.074	-0.0234
145	FVTQRNF	1103	1109	-0.0143	0.1301	0.0794
146	FVTQRNFYEPQIIT	1103	1116	0.0901	0.0352	0.2621
147	FVTQRNFYEPQIITT	1103	1117	0.0838	0.0829	0.1133
148	FYEPQIITT	1109	1117	-0.0937	-0.0936	-0.165
149	SVVNIQKEIDRL	1175	1186	-0.2169	-0.2576	0.0061
150	VNIQKEIDRL	1177	1186	-0.1704	-0.1194	-0.3475
151	IQKEIDRL	1179	1186	-0.3091	-0.2929	-0.078
152	NEVAKNLNESL	1187	1197	-0.1266	-0.1704	-0.3223
153	VAKNLNESL	1189	1197	-0.1627	-0.1054	-0.1674
154	IDLQE	1198	1202	-0.0502	0.0077	-0.0788
155	QELGKYEQ	1201	1208	0.0204	-0.0136	-0.1369
156	QELGKYEQY	1201	1209	0.0791	0.0352	-0.0676
157	GSGYI	1224	1228	0.0203	0.0149	0.0504
158	YVRKDGEW	1238	1245	0.0226	0.0042	-0.1199
159	VLLST	1246	1250	0.0681	-0.0009	-0.0559
160	VLLSTF	1246	1251	0.0103	-0.0665	0.0166
