# Supplementary material for: Timeline of changes in spike conformational dynamics in emergent SARS-CoV-2 variants reveal progressive stabilization of trimer stalk with altered NTD dynamics
Source: eLife. 2023 Mar 17;12:e82584. doi: 10.7554/eLife.82584 (PMC10049203; doi:10.7554/eLife.82584)
Supplement: Figure 2—source data 3. [file elife-82584-fig2-data3.xlsx]

## Sheet: Figure 2- Source Data 3- WT2P v
Protein	Start	End	Sequence	MaxUptake	State	Exposure	RT_diff_ave	RT_diff_SD	Center_diff_ave	Center_diff_SD	Uptake_diff_ave	Uptake_diff_SD	RU_diff_ave	RU_diff_SD	Correction	Welch_pValue	BH_sig	Significance
	32	42	FTRGVYYPDKV	9	Spike_WT_6P - Spike_WT_2P	1	0.0176628	0.00921279	0.0281575	0.0212583	0.0275244	0.0425165	0.00305826	0.00472406	Not corrected	0.538299	0	Non significant
	32	43	FTRGVYYPDKVF	10	Spike_WT_6P - Spike_WT_2P	1	0.029468	0.00545476	0.01173	0.0125133	0.0422059	0.0375398	0.00422059	0.00375398	Not corrected	0.204102	0	Non significant
	32	48	FTRGVYYPDKVFRSSVL	15	Spike_WT_6P - Spike_WT_2P	1	0.02755	0.00495067	-0.010783	0.00847958	-0.0587189	0.0339183	-0.00391459	0.00226122	Not corrected	0.140166	0	Non significant
	36	43	VYYPDKVF	6	Spike_WT_6P - Spike_WT_2P	1	0.0159005	0.0114612	0.0003305	0.0332	-0.0456106	0.0663999	-0.00760177	0.0110667	Not corrected	0.394134	0	Non significant
	36	48	VYYPDKVFRSSVL	11	Spike_WT_6P - Spike_WT_2P	1	0.020485	0.00654493	0.00130117	0.038146	0.0226719	0.114438	0.00206108	0.0104035	Not corrected	0.790536	0	Non significant
	43	48	FRSSVL	5	Spike_WT_6P - Spike_WT_2P	1	0.0238473	0.00888516	0.0479727	0.0212727	0.0595718	0.0212727	0.0119144	0.00425453	Not corrected	0.0411117	0	Non significant
	49	55	HSTQDLF	6	Spike_WT_6P - Spike_WT_2P	1	0.0300883	0.00752965	0.0105777	0.0205848	0.0328303	0.0205848	0.00547172	0.00343079	Not corrected	0.115238	0	Non significant
	92	103	FASTEKSNIIRG	11	Spike_WT_6P - Spike_WT_2P	1	0.0184445	0.00909598	0.0606745	0.0202314	0.21584	0.0404628	0.0196218	0.00367843	Not corrected	0.00477354	0	Non significant
	92	106	FASTEKSNIIRGWIF	14	Spike_WT_6P - Spike_WT_2P	1	0.00605633	0.0222894	0.0588887	0.00926256	0.20644	0.0277877	0.0147457	0.00198483	Not corrected	0.0348806	0	Non significant
	92	110	FASTEKSNIIRGWIFGTTL	18	Spike_WT_6P - Spike_WT_2P	1	0.00749433	0.0162694	-0.0112008	0.0362536	0.0307659	0.108761	0.00170922	0.00604226	Not corrected	0.707226	0	Non significant
	93	103	ASTEKSNIIRG	10	Spike_WT_6P - Spike_WT_2P	1	0.0188873	0.00967057	0.0575878	0.0241923	0.162471	0.0483847	0.0162471	0.00483847	Not corrected	0.0198433	0	Non significant
	104	110	WIFGTTL	6	Spike_WT_6P - Spike_WT_2P	1	0.0144493	0.0185526	0.0324007	0.0245848	0.0607674	0.0245848	0.0101279	0.00409747	Not corrected	0.0453609	0	Non significant
	111	117	DSKTQSL	6	Spike_WT_6P - Spike_WT_2P	1	-0.0460248	0.148233	0.0832402	0.0453474	0.152354	0.0453474	0.0253924	0.00755791	Not corrected	0.157929	0	Non significant
	111	118	DSKTQSLL	7	Spike_WT_6P - Spike_WT_2P	1	0.0226955	0.00764849	0.008781	0.00573731	0.0338378	0.0114746	0.00483397	0.00163923	Not corrected	0.0267373	0	Non significant
	170	176	YVSQPFL	5	Spike_WT_6P - Spike_WT_2P	1	0.026474	0.00871373	0.0150143	0.0147944	0.0788188	0.0295888	0.0157638	0.00591775	Not corrected	0.052465	0	Non significant
	177	186	MDLEGKQGNF	9	Spike_WT_6P - Spike_WT_2P	1	0.0215567	0.00818649	0.0243967	0.0144051	0.123834	0.0288103	0.0137593	0.00320114	Not corrected	0.0449102	0	Non significant
	177	191	MDLEGKQGNFKNLRE	14	Spike_WT_6P - Spike_WT_2P	1	0.0155	0.0137489	0.0262655	0.0142462	0.132451	0.0284924	0.0094608	0.00203517	Not corrected	0.00899526	0	Non significant
	192	199	FVFKNIDG	7	Spike_WT_6P - Spike_WT_2P	1	0.0250273	0.00789794	0.0264002	0.0196184	0.0801037	0.0392369	0.0114434	0.00560527	Not corrected	0.0659044	0	Non significant
	192	201	FVFKNIDGYF	9	Spike_WT_6P - Spike_WT_2P	1	0.0038195	0.0204498	0.0395753	0.00729822	0.0816489	0.0145964	0.0090721	0.00162183	Not corrected	0.00785472	0	Non significant
	195	201	KNIDGYF	6	Spike_WT_6P - Spike_WT_2P	1	0.028418	0.0057107	0.0167392	0.0170754	0.0744343	0.0341508	0.0124057	0.00569181	Not corrected	0.128894	0	Non significant
	201	212	FKIYSKHTPINL	10	Spike_WT_6P - Spike_WT_2P	1	0.0220748	0.00499022	0.0188825	0.0197233	0.0647353	0.0394466	0.00647353	0.00394466	Not corrected	0.200332	0	Non significant
	202	212	KIYSKHTPINL	9	Spike_WT_6P - Spike_WT_2P	1	0.0104638	0.014486	0.012883	0.0682897	0.0303709	0.0682897	0.00337455	0.00758775	Not corrected	0.56356	0	Non significant
	213	220	VRDLPQGF	6	Spike_WT_6P - Spike_WT_2P	1	0.024306	0.00704683	0.0558678	0.0178476	0.100046	0.0178476	0.0166743	0.00297459	Not corrected	0.0423431	0	Non significant
	221	228	SALEPLVD	6	Spike_WT_6P - Spike_WT_2P	1	0.0197083	0.00770459	0.00930383	0.0196796	-0.0018411	0.0196796	-0.00030685	0.00327993	Not corrected	0.923284	0	Non significant
	245	264	HRSYLTPGDSSSGWTAGAAA	18	Spike_WT_6P - Spike_WT_2P	1	0.0199533	0.00472524	0.0431577	0.0249916	0.16463	0.0749747	0.00914612	0.00416526	Not corrected	0.0879731	0	Non significant
	258	264	WTAGAAA	6	Spike_WT_6P - Spike_WT_2P	1	0.006785	0.0118897	0.014304	0.127721	0.0227481	0.127721	0.00379135	0.0212868	Not corrected	0.868603	0	Non significant
	265	276	YYVGYLQPRTFL	10	Spike_WT_6P - Spike_WT_2P	1	0.00657883	0.0250219	0.0571995	0.0602179	0.0810705	0.0602179	0.00810705	0.00602179	Not corrected	0.16269	0	Non significant
	266	276	YVGYLQPRTFL	9	Spike_WT_6P - Spike_WT_2P	1	0.0226137	0.0153229	0.0499388	0.0442213	0.0615708	0.0442213	0.0068412	0.00491348	Not corrected	0.163651	0	Non significant
	267	276	VGYLQPRTFL	8	Spike_WT_6P - Spike_WT_2P	1	0.0293297	0.0130014	-0.00351333	0.0187295	0.0757335	0.037459	0.00946669	0.00468237	Not corrected	0.0632053	0	Non significant
	269	276	YLQPRTFL	6	Spike_WT_6P - Spike_WT_2P	1	0.029314	0.010095	0.0128848	0.0095994	0.0373791	0.0191988	0.00622986	0.0031998	Not corrected	0.101184	0	Non significant
	314	318	QTSNF	4	Spike_WT_6P - Spike_WT_2P	1	0.0202762	0.0121447	0.0433063	0.0262033	0.0725295	0.0262033	0.0181324	0.00655082	Not corrected	0.0349942	0	Non significant
	318	325	FRVQPTES	6	Spike_WT_6P - Spike_WT_2P	1	0.0339985	0.0121941	0.0261812	0.0288561	0.0706015	0.0577122	0.0117669	0.00961869	Not corrected	0.296454	0	Non significant
	369	374	YNSASF	5	Spike_WT_6P - Spike_WT_2P	1	0.0179417	0.00720309	0.0490543	0.0399458	0.073576	0.0399458	0.0147152	0.00798916	Not corrected	0.0843293	0	Non significant
	388	392	NDLCF	4	Spike_WT_6P - Spike_WT_2P	1	0.0245817	0.00886338	-0.068756	0.0355182	-0.0476396	0.0355182	-0.0119099	0.00887954	Not corrected	0.207412	0	Non significant
	396	400	YADSF	4	Spike_WT_6P - Spike_WT_2P	1	0.0229213	0.00727706	-0.00736883	0.00858831	0.0202779	0.00858831	0.00506948	0.00214708	Not corrected	0.133458	0	Non significant
	400	406	FVIRGDE	6	Spike_WT_6P - Spike_WT_2P	1	0.0143672	0.0134153	0.0302748	0.0265634	0.00162501	0.0265634	0.000270835	0.00442723	Not corrected	0.945283	0	Non significant
	401	420	VIRGDEVRQIAPGQTGKIAD	18	Spike_WT_6P - Spike_WT_2P	1	-0.000987833	0.0175496	0.0363548	0.0183781	0.131545	0.0551342	0.00730804	0.00306301	Not corrected	0.0431834	0	Non significant
	407	420	VRQIAPGQTGKIAD	12	Spike_WT_6P - Spike_WT_2P	1	0.0522558	0.00295187	0.0597742	0.0356711	0.096386	0.0713422	0.00803216	0.00594519	Not corrected	0.315295	0	Non significant
	407	421	VRQIAPGQTGKIADY	13	Spike_WT_6P - Spike_WT_2P	1	0.00886883	0.0129873	0.048864	0.0261518	0.172196	0.0523036	0.0132458	0.00402336	Not corrected	0.0224512	0	Non significant
	407	422	VRQIAPGQTGKIADYN	14	Spike_WT_6P - Spike_WT_2P	1	0.000110167	0.0201108	0.0509437	0.0143409	0.119569	0.0286818	0.00854062	0.0020487	Not corrected	0.0657734	0	Non significant
	421	429	YNYKLPDDF	7	Spike_WT_6P - Spike_WT_2P	1	0.0295362	0.0129939	0.0473097	0.0124869	0.0892197	0.0249739	0.0127457	0.0035677	Not corrected	0.0471245	0	Non significant
	442	452	DSKVGGNYNYL	10	Spike_WT_6P - Spike_WT_2P	1	0.0249102	0.00757092	0.0430705	0.0187502	0.053601	0.0375005	0.0053601	0.00375005	Not corrected	0.133121	0	Non significant
	443	452	SKVGGNYNYL	9	Spike_WT_6P - Spike_WT_2P	1	0.0216607	0.0105008	0.0180552	0.0107317	0.0208888	0.0214634	0.00232098	0.00238482	Not corrected	0.292133	0	Non significant
	444	452	KVGGNYNYL	8	Spike_WT_6P - Spike_WT_2P	1	0.027414	0.00705358	0.024092	0.0213771	0.0681323	0.0427542	0.00851654	0.00534427	Not corrected	0.108123	0	Non significant
	453	467	YRLFRKSNLKPFERD	13	Spike_WT_6P - Spike_WT_2P	1	0.0221222	0.0135361	0.003251	0.0118008	0.0574213	0.047203	0.00441702	0.003631	Not corrected	0.210787	0	Non significant
	456	467	FRKSNLKPFERD	10	Spike_WT_6P - Spike_WT_2P	1	-0.0117842	0.0414816	0.0241198	0.0146438	0.0834124	0.0292877	0.00834124	0.00292877	Not corrected	0.0324808	0	Non significant
	456	471	FRKSNLKPFERDISTE	14	Spike_WT_6P - Spike_WT_2P	1	0.0131782	0.0109174	0.0377195	0.0066792	0.205164	0.0267168	0.0146546	0.00190834	Not corrected	0.00641656	0	Non significant
	495	512	YGFQPTNGVGYQPYRVVV	15	Spike_WT_6P - Spike_WT_2P	1	0.0482443	0.0290454	0.331276	0.0832243	0.721159	0.166449	0.0480773	0.0110966	Not corrected	0.128971	0	Non significant
	503	512	VGYQPYRVVV	8	Spike_WT_6P - Spike_WT_2P	1	0.030626	0.00504359	0.023799	0.0252436	0.0659633	0.0504872	0.00824541	0.00631091	Not corrected	0.295742	0	Non significant
	516	533	ELLHAPATVCGPKKSTNL	15	Spike_WT_6P - Spike_WT_2P	1	0.0139397	0.0136012	0.0544453	0.0168178	0.241459	0.0672712	0.0160973	0.00448475	Not corrected	0.0307962	0	Non significant
	542	552	NFNGLTGTGVL	10	Spike_WT_6P - Spike_WT_2P	1	0.0216152	0.0108464	0.058733	0.0234933	0.116826	0.0234933	0.0116826	0.00234933	Not corrected	0.0493938	0	Non significant
	546	552	LTGTGVL	6	Spike_WT_6P - Spike_WT_2P	1	0.0209695	0.00732127	0.035526	0.0426152	0.0613842	0.0426152	0.0102307	0.00710253	Not corrected	0.144082	0	Non significant
	553	565	TESNKKFLPFQQF	11	Spike_WT_6P - Spike_WT_2P	1	0.0345687	0.0183237	-0.0178047	0.0336323	0.0638711	0.0672645	0.00580646	0.00611496	Not corrected	0.2781	0	Non significant
	569	574	IADTTD	5	Spike_WT_6P - Spike_WT_2P	1	0.015028	0.0169289	-0.0436535	0.0917876	-0.0279905	0.0917876	-0.00559809	0.0183575	Not corrected	0.721971	0	Non significant
	569	583	IADTTDAVRDPQTLE	13	Spike_WT_6P - Spike_WT_2P	1	0.00947683	0.0115878	-0.0576225	0.0163764	-0.12881	0.0327527	-0.00990845	0.00251944	Not corrected	0.101157	0	Non significant
	575	582	AVRDPQTL	6	Spike_WT_6P - Spike_WT_2P	1	0.0140025	0.0173509	0.0675312	0.048892	0.101695	0.048892	0.0169491	0.00814866	Not corrected	0.0823164	0	Non significant
	575	583	AVRDPQTLE	7	Spike_WT_6P - Spike_WT_2P	1	0.0405227	0.0181224	0.00105333	0.0233868	0.0470777	0.0467735	0.00672538	0.00668193	Not corrected	0.257367	0	Non significant
	575	584	AVRDPQTLEI	8	Spike_WT_6P - Spike_WT_2P	1	0.0249183	0.00693055	0.0298705	0.0331054	0.0327104	0.0662109	0.0040888	0.00827636	Not corrected	0.523339	0	Non significant
	576	582	VRDPQTL	5	Spike_WT_6P - Spike_WT_2P	1	0.0343812	0.0122035	0.00565133	0.0556794	0.00353551	0.0556794	0.000707102	0.0111359	Not corrected	0.930613	0	Non significant
	586	592	DITPCSF	5	Spike_WT_6P - Spike_WT_2P	1	0.0189082	0.00792372	-0.0296532	0.0326245	-0.0291016	0.0326245	-0.00582032	0.00652489	Not corrected	0.291851	0	Non significant
	627	633	DQLTPTW	5	Spike_WT_6P - Spike_WT_2P	1	0.0204435	0.00863263	0.165977	0.0729762	0.180416	0.0729762	0.0360832	0.0145952	Not corrected	0.0427956	0	Non significant
	627	635	DQLTPTWRV	7	Spike_WT_6P - Spike_WT_2P	1	0.00747433	0.0215398	0.10448	0.0403827	0.187083	0.0807654	0.0267262	0.0115379	Not corrected	0.0465069	0	Non significant
	634	643	RVYSTGSNVF	9	Spike_WT_6P - Spike_WT_2P	1	0.0279825	0.0065403	0.204034	0.0655063	0.172408	0.0655063	0.0191564	0.00727848	Not corrected	0.077818	0	Non significant
	662	671	CDIPIGAGIC	8	Spike_WT_6P - Spike_WT_2P	1	0.0189967	0.0107843	0.0271368	0.129526	0.0239895	0.129526	0.00299869	0.0161908	Not corrected	0.808448	0	Non significant
	687	694	VASQSIIA	7	Spike_WT_6P - Spike_WT_2P	1	0.0134835	0.0113456	0.034121	0.0381066	-0.0128951	0.0381066	-0.00184215	0.0054438	Not corrected	0.652215	0	Non significant
	688	694	ASQSIIA	6	Spike_WT_6P - Spike_WT_2P	1	0.0119087	0.011849	0.238756	0.0507413	0.21763	0.0507413	0.0362716	0.00845688	Not corrected	0.102078	0	Non significant
	691	695	SIIAY	4	Spike_WT_6P - Spike_WT_2P	1	0.020785	0.00749809	-0.0059505	0.0705595	-0.00786577	0.0705595	-0.00196644	0.0176399	Not corrected	0.917492	0	Non significant
	695	699	YTMSL	4	Spike_WT_6P - Spike_WT_2P	1	0.0159132	0.0116736	-0.0224387	0.0277386	0.0107835	0.0277386	0.00269588	0.00693465	Not corrected	0.608573	0	Non significant
	719	723	TISVT	4	Spike_WT_6P - Spike_WT_2P	1	0.0170237	0.0139905	0.0162235	0.0067696	0.0631477	0.0067696	0.0157869	0.0016924	Not corrected	0.00200048	0	Non significant
	722	727	VTTEIL	5	Spike_WT_6P - Spike_WT_2P	1	0.0205278	0.00645481	-0.101765	0.0201917	-0.136132	0.0201917	-0.0272265	0.00403834	Not corrected	0.00903932	0	Non significant
	724	730	TEILPVS	5	Spike_WT_6P - Spike_WT_2P	1	0.0165732	0.0071769	0.0228453	0.0334635	-0.0010711	0.0334635	-0.000214221	0.00669269	Not corrected	0.964977	0	Non significant
	724	731	TEILPVSM	6	Spike_WT_6P - Spike_WT_2P	1	-0.00537467	0.0275331	0.0726308	0.0518954	0.0103697	0.0518954	0.00172828	0.00864923	Not corrected	0.787094	0	Non significant
	725	731	EILPVSM	5	Spike_WT_6P - Spike_WT_2P	1	0.0199012	0.0094673	0.0145218	0.0274796	-0.00876175	0.0274796	-0.00175235	0.00549593	Not corrected	0.673161	0	Non significant
	753	759	LLQYGSF	6	Spike_WT_6P - Spike_WT_2P	1	0.0240685	0.00933406	0.0715278	0.00717889	0.0861671	0.00717889	0.0143612	0.00119648	Not corrected	0.00249628	0	Non significant
	754	759	LQYGSF	5	Spike_WT_6P - Spike_WT_2P	1	0.0184963	0.0164257	0.0549272	0.0239612	0.0478803	0.0239612	0.00957606	0.00479223	Not corrected	0.219685	0	Non significant
	764	771	NRALTGIA	7	Spike_WT_6P - Spike_WT_2P	1	0.0125993	0.0132918	0.0340695	0.0216135	0.0230579	0.0216135	0.00329399	0.00308764	Not corrected	0.240023	0	Non significant
	770	782	IAVEQDKNTQEVF	12	Spike_WT_6P - Spike_WT_2P	1	0.0224327	0.00711106	0.00882133	0.0161822	0.0645409	0.0485466	0.00537841	0.00404555	Not corrected	0.152462	0	Non significant
	772	782	VEQDKNTQEVF	10	Spike_WT_6P - Spike_WT_2P	1	0.0245372	0.00883557	0.004887	0.0369326	0.0251914	0.0738653	0.00251914	0.00738653	Not corrected	0.699632	0	Non significant
	774	782	QDKNTQEVF	8	Spike_WT_6P - Spike_WT_2P	1	0.0212503	0.00847258	0.014635	0.0263722	-0.0202246	0.0527443	-0.00252808	0.00659304	Not corrected	0.616862	0	Non significant
	783	796	AQVKQIYKTPPIKD	11	Spike_WT_6P - Spike_WT_2P	1	-0.00739433	0.0312802	0.0539593	0.0303175	0.108378	0.0909526	0.00985255	0.00826842	Not corrected	0.185923	0	Non significant
	818	822	IEDLL	4	Spike_WT_6P - Spike_WT_2P	1	0.0253597	0.00871962	-0.0557947	0.0155415	-0.00511136	0.0155415	-0.00127784	0.00388538	Not corrected	0.682122	0	Non significant
	821	828	LLFNKVTL	7	Spike_WT_6P - Spike_WT_2P	1	0.0281922	0.0132283	0.0505887	0.0295395	0.152509	0.059079	0.021787	0.00843986	Not corrected	0.0894303	0	Non significant
	822	828	LFNKVTL	6	Spike_WT_6P - Spike_WT_2P	1	0.0270948	0.00499646	0.0529857	0.0308904	0.111145	0.0617808	0.0185241	0.0102968	Not corrected	0.0995086	0	Non significant
	822	833	LFNKVTLADAGF	11	Spike_WT_6P - Spike_WT_2P	1	0.0268267	0.0139081	0.104611	0.0455316	0.220753	0.0910632	0.0200684	0.00827848	Not corrected	0.14346	0	Non significant
	823	828	FNKVTL	5	Spike_WT_6P - Spike_WT_2P	1	0.0204052	0.00681974	0.0120215	0.0130566	0.0321435	0.0261131	0.00642869	0.00522263	Not corrected	0.17539	0	Non significant
	823	832	FNKVTLADAG	9	Spike_WT_6P - Spike_WT_2P	1	0.013494	0.012135	0.0267327	0.0284191	0.13029	0.0568383	0.0144767	0.00631536	Not corrected	0.0506469	0	Non significant
	823	833	FNKVTLADAGF	10	Spike_WT_6P - Spike_WT_2P	1	0.0102803	0.0191699	0.101916	0.0237422	0.186189	0.0474844	0.0186189	0.00474844	Not corrected	0.0368394	0	Non significant
	829	833	ADAGF	4	Spike_WT_6P - Spike_WT_2P	1	0.0181995	0.00930279	0.0363285	0.0210156	0.0415898	0.0210156	0.0103974	0.00525389	Not corrected	0.0752697	0	Non significant
	859	865	TVLPPLL	4	Spike_WT_6P - Spike_WT_2P	1	0.00442667	0.0199406	0.0167405	0.0707407	0.0444234	0.0707407	0.0111059	0.0176852	Not corrected	0.487494	0	Non significant
	859	866	TVLPPLLT	5	Spike_WT_6P - Spike_WT_2P	1	0.0198708	0.0108848	-0.0142762	0.067156	-0.0488883	0.067156	-0.00977766	0.0134312	Not corrected	0.393235	0	Non significant
	870	877	IAQYTSAL	7	Spike_WT_6P - Spike_WT_2P	1	0.0201172	0.00683926	-0.0414868	0.0621654	-0.0175028	0.0621654	-0.0025004	0.00888077	Not corrected	0.708713	0	Non significant
	873	877	YTSAL	4	Spike_WT_6P - Spike_WT_2P	1	0.0178522	0.0108092	-0.0124505	0.0381087	0.00163073	0.0381087	0.000407682	0.00952718	Not corrected	0.953203	0	Non significant
	873	878	YTSALL	5	Spike_WT_6P - Spike_WT_2P	1	0.0177215	0.0106153	0.0122075	0.0215553	0.058632	0.0215553	0.0117264	0.00431105	Not corrected	0.194618	0	Non significant
	878	885	LAGTITSG	7	Spike_WT_6P - Spike_WT_2P	1	0.0277692	0.0137449	-0.100422	0.122119	-0.0692099	0.122119	-0.00988712	0.0174456	Not corrected	0.469713	0	Non significant
	886	891	WTFGAG	5	Spike_WT_6P - Spike_WT_2P	1	0.0238395	0.00756989	0.0767723	0.0269742	0.0573804	0.0269742	0.0114761	0.00539483	Not corrected	0.0809586	0	Non significant
	886	893	WTFGAGAA	7	Spike_WT_6P - Spike_WT_2P	1	0.026255	0.00777897	0.169091	0.0521415	0.179748	0.0521415	0.0256783	0.00744878	Not corrected	0.156502	0	Non significant
	902	906	MAYRF	4	Spike_WT_6P - Spike_WT_2P	1	0.0312057	0.00706625	0.0114743	0.0320483	0.0733873	0.0320483	0.0183468	0.00801207	Not corrected	0.0597249	0	Non significant
	902	916	MAYRFNGIGVTQNVL	14	Spike_WT_6P - Spike_WT_2P	1	0.0275657	0.0162307	-0.0641597	0.0395893	-0.0888658	0.0791786	-0.00634756	0.00565561	Not corrected	0.210335	0	Non significant
	903	916	AYRFNGIGVTQNVL	13	Spike_WT_6P - Spike_WT_2P	1	0.0266663	0.016055	0.0367872	0.0527908	0.148882	0.105582	0.0114525	0.00812166	Not corrected	0.153176	0	Non significant
	904	916	YRFNGIGVTQNVL	12	Spike_WT_6P - Spike_WT_2P	1	0.0280578	0.0154187	0.06097	0.0773956	0.164421	0.154791	0.0137018	0.0128993	Not corrected	0.23641	0	Non significant
	907	913	NGIGVTQ	6	Spike_WT_6P - Spike_WT_2P	1	0.0279338	0.0120479	0.0585307	0.0765295	0.0938416	0.0765295	0.0156403	0.0127549	Not corrected	0.314053	0	Non significant
	909	916	IGVTQNVL	7	Spike_WT_6P - Spike_WT_2P	1	0.0200285	0.00555538	-0.0204727	0.0925123	-0.0255117	0.0925123	-0.00364453	0.013216	Not corrected	0.724326	0	Non significant
	911	916	VTQNVL	5	Spike_WT_6P - Spike_WT_2P	1	0.0186738	0.00922286	-0.0279623	0.0944993	0.0401955	0.0944993	0.0080391	0.0188999	Not corrected	0.578102	0	Non significant
	917	922	YENQKL	5	Spike_WT_6P - Spike_WT_2P	1	0.106438	0.06354	-0.0290405	0.0154763	0.0228588	0.0154763	0.00457176	0.00309526	Not corrected	0.188403	0	Non significant
	917	924	YENQKLIA	7	Spike_WT_6P - Spike_WT_2P	1	0.0145345	0.0130975	-0.00709317	0.0177932	0.00233775	0.0355865	0.000333964	0.00508378	Not corrected	0.928298	0	Non significant
	923	927	IANQF	4	Spike_WT_6P - Spike_WT_2P	1	0.0189038	0.00921789	-0.0187742	0.00893934	-0.0348274	0.00893934	-0.00870685	0.00223483	Not corrected	0.0119075	0	Non significant
	923	930	IANQFNSA	7	Spike_WT_6P - Spike_WT_2P	1	0.0068995	0.0118689	-0.0068885	0.0337952	0.0357138	0.0337952	0.00510198	0.00482788	Not corrected	0.243848	0	Non significant
	923	938	IANQFNSAIGKIQDSL	15	Spike_WT_6P - Spike_WT_2P	1	0.0219285	0.0116411	0.085838	0.0378452	0.156326	0.0756904	0.0104217	0.00504603	Not corrected	0.0605321	0	Non significant
	925	938	NQFNSAIGKIQDSL	13	Spike_WT_6P - Spike_WT_2P	1	0.0225122	0.0138532	0.0417618	0.0976526	0.142267	0.195305	0.0109436	0.0150235	Not corrected	0.425816	0	Non significant
	928	936	NSAIGKIQD	8	Spike_WT_6P - Spike_WT_2P	1	0.0167165	0.0128111	-0.0290117	0.0675548	0.000902216	0.13511	0.000112777	0.0168887	Not corrected	0.994262	0	Non significant
	928	938	NSAIGKIQDSL	10	Spike_WT_6P - Spike_WT_2P	1	0.0225953	0.00712561	0.0422985	0.0191055	0.1487	0.038211	0.01487	0.0038211	Not corrected	0.0124133	0	Non significant
	931	938	IGKIQDSL	7	Spike_WT_6P - Spike_WT_2P	1	0.0175115	0.00832136	0.0292132	0.0200571	0.0730114	0.0401141	0.0104302	0.00573059	Not corrected	0.0804159	0	Non significant
	946	954	GKLQDVVNQ	8	Spike_WT_6P - Spike_WT_2P	1	0.00306217	0.0209567	-0.0312597	0.0538459	-0.116812	0.107692	-0.0146016	0.0134615	Not corrected	0.216506	0	Non significant
	946	961	GKLQDVVNQNAQALNT	15	Spike_WT_6P - Spike_WT_2P	1	0.0116313	0.00484103	-0.00279483	0.0460905	0.0322661	0.0921811	0.00215107	0.0061454	Not corrected	0.668272	0	Non significant
	947	955	KLQDVVNQN	8	Spike_WT_6P - Spike_WT_2P	1	0.020819	0.00572953	-0.0800257	0.0960422	-0.0481465	0.0960422	-0.00601831	0.0120053	Not corrected	0.611925	0	Non significant
	951	961	VVNQNAQALNT	10	Spike_WT_6P - Spike_WT_2P	1	0.089945	0.0658476	-0.00195383	0.0511079	0.00269288	0.102216	0.000269288	0.0102216	Not corrected	0.972221	0	Non significant
	962	970	LVKQLSSNF	8	Spike_WT_6P - Spike_WT_2P	1	0.0215037	0.00535094	-0.0753805	0.116341	-0.0398888	0.116341	-0.00498609	0.0145426	Not corrected	0.651358	0	Non significant
	962	977	LVKQLSSNFGAISSVL	15	Spike_WT_6P - Spike_WT_2P	1	0.00996483	0.0188369	-0.199012	0.105837	-0.375324	0.211674	-0.0250216	0.0141116	Not corrected	0.0851788	0	Non significant
	963	970	VKQLSSNF	7	Spike_WT_6P - Spike_WT_2P	1	0.0195317	0.00988287	-0.037798	0.0330927	-0.112894	0.0661854	-0.0161277	0.00945505	Not corrected	0.161798	0	Non significant
	971	977	GAISSVL	6	Spike_WT_6P - Spike_WT_2P	1	0.0199718	0.0063297	-0.0771957	0.0209451	-0.0437786	0.0209451	-0.00729644	0.00349085	Not corrected	0.0767456	0	Non significant
	991	996	VQIDRL	5	Spike_WT_6P - Spike_WT_2P	1	0.0209065	0.00712282	-0.0815672	0.0924406	-0.0661076	0.0924406	-0.0132215	0.0184881	Not corrected	0.385642	0	Non significant
	993	1001	IDRLITGRL	8	Spike_WT_6P - Spike_WT_2P	1	0.0217525	0.004617	-0.0470073	0.058297	-0.0941497	0.116594	-0.0117687	0.0145742	Not corrected	0.330821	0	Non significant
	997	1001	ITGRL	4	Spike_WT_6P - Spike_WT_2P	1	0.0741155	0.0439181	-0.0244032	0.0455465	-0.0351901	0.0455465	-0.00879751	0.0113866	Not corrected	0.456563	0	Non significant
	1007	1012	YVTQQL	5	Spike_WT_6P - Spike_WT_2P	1	0.0155145	0.00901609	-0.0191222	0.00272809	-0.0438007	0.00272809	-0.00876014	0.000545618	Not corrected	0.00540523	0	Non significant
	1016	1024	AEIRASANL	8	Spike_WT_6P - Spike_WT_2P	1	0.0078165	0.0134878	0.000272667	0.10886	0.0603471	0.10886	0.00754339	0.0136075	Not corrected	0.477358	0	Non significant
	1018	1024	IRASANL	6	Spike_WT_6P - Spike_WT_2P	1	0.018956	0.013193	0.0289053	0.0146379	0.083832	0.0146379	0.013972	0.00243965	Not corrected	0.100557	0	Non significant
	1050	1062	MSFPQSAPHGVVF	10	Spike_WT_6P - Spike_WT_2P	1	0.0307385	0.0149033	0.0228258	0.0187855	0.0594579	0.0375709	0.00594579	0.00375709	Not corrected	0.128514	0	Non significant
	1090	1095	PREGVF	4	Spike_WT_6P - Spike_WT_2P	1	0.028448	0.00865822	0.0408817	0.0155117	0.0642161	0.0155117	0.016054	0.00387792	Not corrected	0.0965699	0	Non significant
	1103	1109	FVTQRNF	6	Spike_WT_6P - Spike_WT_2P	1	0.014531	0.0112747	-0.070888	0.176329	-0.0403476	0.176329	-0.0067246	0.0293882	Not corrected	0.832028	0	Non significant
	1103	1116	FVTQRNFYEPQIIT	12	Spike_WT_6P - Spike_WT_2P	1	0.002267	0.0296451	0.054327	0.0195361	0.0997771	0.0390721	0.00831476	0.00325601	Not corrected	0.199921	0	Non significant
	1103	1117	FVTQRNFYEPQIITT	13	Spike_WT_6P - Spike_WT_2P	1	0.0127703	0.0172753	0.0612937	0.00890768	0.0812533	0.0178154	0.00625025	0.00137041	Not corrected	0.0111973	0	Non significant
	1109	1117	FYEPQIITT	7	Spike_WT_6P - Spike_WT_2P	1	0.0102728	0.0225392	0.0137323	0.0145732	-0.0944919	0.0145732	-0.0134988	0.00208189	Not corrected	0.00975854	0	Non significant
	1175	1186	SVVNIQKEIDRL	11	Spike_WT_6P - Spike_WT_2P	1	0.0112523	0.0206305	-0.089643	0.0589212	-0.223985	0.176764	-0.0203623	0.0160694	Not corrected	0.177879	0	Non significant
	1177	1186	VNIQKEIDRL	9	Spike_WT_6P - Spike_WT_2P	1	0.0248718	0.00878968	-0.118059	0.0798688	-0.191293	0.159738	-0.0212547	0.0177486	Not corrected	0.192539	0	Non significant
	1179	1186	IQKEIDRL	7	Spike_WT_6P - Spike_WT_2P	1	0.00809933	0.0140493	-0.144674	0.0649979	-0.330183	0.129996	-0.047169	0.0185708	Not corrected	0.0586749	0	Non significant
	1187	1197	NEVAKNLNESL	10	Spike_WT_6P - Spike_WT_2P	1	0.0163812	0.00946978	-0.0889685	0.0647227	-0.147178	0.129445	-0.0147178	0.0129445	Not corrected	0.21453	0	Non significant
	1189	1197	VAKNLNESL	8	Spike_WT_6P - Spike_WT_2P	1	0.0146628	0.0130067	-0.0786482	0.0448943	-0.179477	0.0897885	-0.0224346	0.0112236	Not corrected	0.0886692	0	Non significant
	1198	1202	IDLQE	4	Spike_WT_6P - Spike_WT_2P	1	0.0117288	0.0132269	-0.0723162	0.0947841	-0.0507966	0.0947841	-0.0126992	0.023696	Not corrected	0.510342	0	Non significant
	1201	1208	QELGKYEQ	7	Spike_WT_6P - Spike_WT_2P	1	-0.00470833	0.0455909	-0.0230477	0.0593952	-0.0564895	0.11879	-0.00806993	0.0169701	Not corrected	0.662926	0	Non significant
	1201	1209	QELGKYEQY	8	Spike_WT_6P - Spike_WT_2P	1	0.015584	0.0110804	0.026483	0.0239331	0.0854193	0.0478662	0.0106774	0.00598327	Not corrected	0.10359	0	Non significant
	1224	1228	GSGYI	4	Spike_WT_6P - Spike_WT_2P	1	0.0251852	0.00715318	-0.0457	0.0464555	0.0136501	0.0464555	0.00341252	0.0116139	Not corrected	0.695869	0	Non significant
	1238	1245	YVRKDGEW	7	Spike_WT_6P - Spike_WT_2P	1	0.0195998	0.0121487	0.0126658	0.00993401	0.022739	0.019868	0.00324843	0.00283829	Not corrected	0.230861	0	Non significant
	1246	1250	VLLST	4	Spike_WT_6P - Spike_WT_2P	1	0.0147223	0.0114409	0.0365663	0.0292774	0.0666214	0.0292774	0.0166553	0.00731935	Not corrected	0.101071	0	Non significant
	1246	1251	VLLSTF	5	Spike_WT_6P - Spike_WT_2P	1	0.0244643	0.0104702	0.0106248	0.0293306	0.00961594	0.0293306	0.00192319	0.00586612	Not corrected	0.661713	0	Non significant
	21	31	RTQLPPAYTNS	8	Spike_WT_6P - Spike_WT_2P	2	-0.0325972	0.0499683	-0.0529102	0.0729249	-0.110464	0.14585	-0.013808	0.0182312	Not corrected	0.487588	0	Non significant
	32	42	FTRGVYYPDKV	9	Spike_WT_6P - Spike_WT_2P	2	0.00799217	0.00577115	0.0111177	0.007254	-0.00655531	0.014508	-0.000728368	0.001612	Not corrected	0.558007	0	Non significant
	32	43	FTRGVYYPDKVF	10	Spike_WT_6P - Spike_WT_2P	2	0.0583865	0.0675933	0.00360333	0.0132896	0.0178259	0.0398687	0.00178259	0.00398687	Not corrected	0.558635	0	Non significant
	32	48	FTRGVYYPDKVFRSSVL	15	Spike_WT_6P - Spike_WT_2P	2	0.0457343	0.0522184	0.00913917	0.0251249	0.0209697	0.100499	0.00139798	0.00669997	Not corrected	0.778228	0	Non significant
	36	43	VYYPDKVF	6	Spike_WT_6P - Spike_WT_2P	2	0.0179862	0.02789	0.0751618	0.049922	0.104052	0.0998439	0.017342	0.0166407	Not corrected	0.234412	0	Non significant
	36	48	VYYPDKVFRSSVL	11	Spike_WT_6P - Spike_WT_2P	2	0.0201723	0.0185618	-0.0362097	0.0334774	-0.0898606	0.100432	-0.00816915	0.0091302	Not corrected	0.289707	0	Non significant
	43	48	FRSSVL	5	Spike_WT_6P - Spike_WT_2P	2	0.0142847	0.0035364	0.000796167	0.0298916	0.0123953	0.0298916	0.00247905	0.00597833	Not corrected	0.58575	0	Non significant
	49	55	HSTQDLF	6	Spike_WT_6P - Spike_WT_2P	2	0.0542725	0.0551672	0.0360973	0.0126206	0.05835	0.0126206	0.00972499	0.00210344	Not corrected	0.0332095	0	Non significant
	92	103	FASTEKSNIIRG	11	Spike_WT_6P - Spike_WT_2P	2	0.0309565	0.0269717	0.0502855	0.0364186	0.195062	0.0728371	0.0177329	0.00662156	Not corrected	0.0461108	0	Non significant
	92	106	FASTEKSNIIRGWIF	14	Spike_WT_6P - Spike_WT_2P	2	0.0267315	0.00771286	0.016594	0.0250294	0.0795565	0.0750881	0.00568261	0.00536344	Not corrected	0.364969	0	Non significant
	92	110	FASTEKSNIIRGWIFGTTL	18	Spike_WT_6P - Spike_WT_2P	2	0.0331475	0.00833643	0.0128838	0.0572549	0.10302	0.171765	0.00572333	0.00954249	Not corrected	0.576868	0	Non significant
	93	103	ASTEKSNIIRG	10	Spike_WT_6P - Spike_WT_2P	2	0.0331027	0.0282861	0.0563353	0.0541444	0.159966	0.108289	0.0159966	0.0108289	Not corrected	0.14444	0	Non significant
	94	103	STEKSNIIRG	9	Spike_WT_6P - Spike_WT_2P	2	0.0321868	0.0278448	0.032669	0.0112003	0.0790229	0.0224006	0.00878032	0.00248896	Not corrected	0.0282256	0	Non significant
	104	110	WIFGTTL	6	Spike_WT_6P - Spike_WT_2P	2	0.0434842	0.0116572	0.0316002	0.0241571	0.0599669	0.0241571	0.00999448	0.00402619	Not corrected	0.143433	0	Non significant
	111	117	DSKTQSL	6	Spike_WT_6P - Spike_WT_2P	2	0.131605	0.0927784	0.053247	0.0744245	0.122361	0.0744245	0.0203935	0.0124041	Not corrected	0.299372	0	Non significant
	111	118	DSKTQSLL	7	Spike_WT_6P - Spike_WT_2P	2	0.011524	0.00460797	0.0060745	0.00798289	0.0284248	0.0159658	0.00406069	0.00228082	Not corrected	0.0991284	0	Non significant
	170	176	YVSQPFL	5	Spike_WT_6P - Spike_WT_2P	2	0.02636	0.00733523	0.0287468	0.0253474	0.106284	0.0506949	0.0212568	0.010139	Not corrected	0.142153	0	Non significant
	177	186	MDLEGKQGNF	9	Spike_WT_6P - Spike_WT_2P	2	0.0136062	0.00440921	-0.00752617	0.0227023	0.0599882	0.0454047	0.00666536	0.00504496	Not corrected	0.170521	0	Non significant
	177	191	MDLEGKQGNFKNLRE	14	Spike_WT_6P - Spike_WT_2P	2	0.00417717	0.00625102	0.0112185	0.0224147	0.102357	0.0448293	0.00731123	0.00320209	Not corrected	0.12631	0	Non significant
	192	199	FVFKNIDG	7	Spike_WT_6P - Spike_WT_2P	2	0.0627457	0.0742099	0.0188702	0.0192485	0.0650437	0.038497	0.00929195	0.00549957	Not corrected	0.0955318	0	Non significant
	192	200	FVFKNIDGY	8	Spike_WT_6P - Spike_WT_2P	2	0.024503	0	-0.022769	0	-0.0189322	0	-0.00236653	0	Not corrected	0	0	Non significant
	192	201	FVFKNIDGYF	9	Spike_WT_6P - Spike_WT_2P	2	0.0274172	0.00887697	0.0201678	0.0112443	0.0428339	0.0224886	0.00475932	0.00249873	Not corrected	0.0828875	0	Non significant
	195	201	KNIDGYF	6	Spike_WT_6P - Spike_WT_2P	2	0.0125015	0.00360919	0.0469095	0.0136835	0.134775	0.027367	0.0224625	0.00456116	Not corrected	0.0305926	0	Non significant
	201	212	FKIYSKHTPINL	10	Spike_WT_6P - Spike_WT_2P	2	0.009944	0.00722464	0.0011145	0.0253577	0.0291993	0.0507154	0.00291993	0.00507154	Not corrected	0.507594	0	Non significant
	202	212	KIYSKHTPINL	9	Spike_WT_6P - Spike_WT_2P	2	0.0105978	0.00511373	-0.0221395	0.0368604	-0.00465156	0.0368604	-0.00051684	0.0040956	Not corrected	0.863378	0	Non significant
	213	220	VRDLPQGF	6	Spike_WT_6P - Spike_WT_2P	2	0.0225973	0.012008	0.0646938	0.0268398	0.108872	0.0268398	0.0181453	0.0044733	Not corrected	0.0407065	0	Non significant
	221	228	SALEPLVD	6	Spike_WT_6P - Spike_WT_2P	2	0.0290117	0.0311435	0.00145017	0.0415025	-0.00969477	0.0415025	-0.00161579	0.00691708	Not corrected	0.76876	0	Non significant
	245	264	HRSYLTPGDSSSGWTAGAAA	18	Spike_WT_6P - Spike_WT_2P	2	0.0132137	0.00507532	0.0181367	0.0385751	0.0895671	0.115725	0.00497595	0.00642918	Not corrected	0.351532	0	Non significant
	258	264	WTAGAAA	6	Spike_WT_6P - Spike_WT_2P	2	0.000705667	0.00892607	-0.0156802	0.0661147	-0.00723604	0.0661147	-0.00120601	0.0110191	Not corrected	0.914097	0	Non significant
	265	276	YYVGYLQPRTFL	10	Spike_WT_6P - Spike_WT_2P	2	0.0241432	0.00689906	0.0815548	0.0597183	0.105426	0.0597183	0.0105426	0.00597183	Not corrected	0.115569	0	Non significant
	266	276	YVGYLQPRTFL	9	Spike_WT_6P - Spike_WT_2P	2	0.0241675	0.00659096	0.0273505	0.0326125	0.0389824	0.0326125	0.00433138	0.00362362	Not corrected	0.308628	0	Non significant
	267	276	VGYLQPRTFL	8	Spike_WT_6P - Spike_WT_2P	2	0.0270115	0.00445656	0.0090605	0.0256715	0.100881	0.051343	0.0126102	0.00641788	Not corrected	0.104222	0	Non significant
	269	276	YLQPRTFL	6	Spike_WT_6P - Spike_WT_2P	2	0.0286007	0.00913559	0.027503	0.00479826	0.0666155	0.00959652	0.0111026	0.00159942	Not corrected	0.0410074	0	Non significant
	306	313	FTVEKGIY	7	Spike_WT_6P - Spike_WT_2P	2	0.009809	0.00493634	0.007071	0.0127322	0.00894057	0.0127322	0.00127722	0.00181888	Not corrected	0.503047	0	Non significant
	306	317	FTVEKGIYQTSN	11	Spike_WT_6P - Spike_WT_2P	2	0.00873417	0.00454098	0.034706	0.0376778	0.097047	0.0753557	0.00882246	0.00685052	Not corrected	0.286514	0	Non significant
	314	318	QTSNF	4	Spike_WT_6P - Spike_WT_2P	2	0.002845	0.0161636	-0.00352667	0.0216233	0.0256965	0.0216233	0.00642414	0.00540584	Not corrected	0.186909	0	Non significant
	369	374	YNSASF	5	Spike_WT_6P - Spike_WT_2P	2	0.00664017	0.00338236	0.035571	0.011669	0.0600927	0.011669	0.0120185	0.00233381	Not corrected	0.0073011	0	Non significant
	388	392	NDLCF	4	Spike_WT_6P - Spike_WT_2P	2	0.0263325	0.00704228	-0.0656853	0.0331187	-0.0445689	0.0331187	-0.0111422	0.00827967	Not corrected	0.279871	0	Non significant
	396	400	YADSF	4	Spike_WT_6P - Spike_WT_2P	2	0.0168027	0.00925424	0.00118833	0.0175634	0.0288351	0.0175634	0.00720877	0.00439086	Not corrected	0.121109	0	Non significant
	400	406	FVIRGDE	6	Spike_WT_6P - Spike_WT_2P	2	0.00671417	0.00259007	0.0082795	0.0195434	-0.0203703	0.0195434	-0.00339505	0.00325723	Not corrected	0.438713	0	Non significant
	401	420	VIRGDEVRQIAPGQTGKIAD	18	Spike_WT_6P - Spike_WT_2P	2	0.00312617	0.00547204	0.0304858	0.0232164	0.113938	0.0696491	0.00632987	0.0038694	Not corrected	0.159207	0	Non significant
	401	422	VIRGDEVRQIAPGQTGKIADYN	20	Spike_WT_6P - Spike_WT_2P	2	0.002917	0	-0.029506	0	-0.104394	0	-0.00521969	0	Not corrected	0	0	Non significant
	407	420	VRQIAPGQTGKIAD	12	Spike_WT_6P - Spike_WT_2P	2	0.0148275	0.0158789	0.0324122	0.0297221	0.041662	0.0594443	0.00347183	0.00495369	Not corrected	0.509425	0	Non significant
	407	421	VRQIAPGQTGKIADY	13	Spike_WT_6P - Spike_WT_2P	2	0.00386833	0.00637275	0.0177555	0.0146582	0.109979	0.0293165	0.00845989	0.00225511	Not corrected	0.0183926	0	Non significant
	407	422	VRQIAPGQTGKIADYN	14	Spike_WT_6P - Spike_WT_2P	2	0.00158733	0.00441201	0.0252013	0.0246883	0.068084	0.0493766	0.00486315	0.0035269	Not corrected	0.229047	0	Non significant
	421	429	YNYKLPDDF	7	Spike_WT_6P - Spike_WT_2P	2	0.0237985	0.00985195	0.0453677	0.0149693	0.0853357	0.0299386	0.0121908	0.00427695	Not corrected	0.091474	0	Non significant
	443	452	SKVGGNYNYL	9	Spike_WT_6P - Spike_WT_2P	2	0.0207612	0.00563172	0.0125298	0.0139385	0.00983811	0.027877	0.00109312	0.00309744	Not corrected	0.649782	0	Non significant
	444	452	KVGGNYNYL	8	Spike_WT_6P - Spike_WT_2P	2	0.0191468	0.00731554	0.0556747	0.0319725	0.131298	0.0639451	0.0164122	0.00799313	Not corrected	0.230498	0	Non significant
	453	467	YRLFRKSNLKPFERD	13	Spike_WT_6P - Spike_WT_2P	2	0.0118357	0.00569473	0.002033	0.00363697	0.0525493	0.0145479	0.00404225	0.00111907	Not corrected	0.0156282	0	Non significant
	456	467	FRKSNLKPFERD	10	Spike_WT_6P - Spike_WT_2P	2	0.0133653	0.00581986	0.00127767	0.013063	0.0377281	0.026126	0.00377281	0.0026126	Not corrected	0.291857	0	Non significant
	456	470	FRKSNLKPFERDIST	13	Spike_WT_6P - Spike_WT_2P	2	0.002907	0	0.005032	0	0.15943	0	0.0122638	0	Not corrected	0	0	Non significant
	456	471	FRKSNLKPFERDISTE	14	Spike_WT_6P - Spike_WT_2P	2	0.009751	0.00558555	0.0144805	0.0275603	0.112208	0.110241	0.00801488	0.00787437	Not corrected	0.441659	0	Non significant
	495	512	YGFQPTNGVGYQPYRVVV	15	Spike_WT_6P - Spike_WT_2P	2	0.0291268	0.0134106	0.239409	0.0709909	0.537424	0.141982	0.0358282	0.00946545	Not corrected	0.0278715	0	Non significant
	503	512	VGYQPYRVVV	8	Spike_WT_6P - Spike_WT_2P	2	0.014061	0.00253352	0.0125655	0.0500469	0.0434963	0.100094	0.00543704	0.0125117	Not corrected	0.699565	0	Non significant
	516	533	ELLHAPATVCGPKKSTNL	15	Spike_WT_6P - Spike_WT_2P	2	0.00204017	0.00551863	0.00937317	0.0407381	0.0611705	0.162952	0.00407804	0.0108635	Not corrected	0.742266	0	Non significant
	542	552	NFNGLTGTGVL	10	Spike_WT_6P - Spike_WT_2P	2	0.0216312	0.0057475	0.0258077	0.0235403	0.0839004	0.0235403	0.00839004	0.00235403	Not corrected	0.0531724	0	Non significant
	546	552	LTGTGVL	6	Spike_WT_6P - Spike_WT_2P	2	0.00978583	0.00460829	0.0359247	0.0394528	0.0617829	0.0394528	0.0102971	0.00657546	Not corrected	0.272471	0	Non significant
	569	574	IADTTD	5	Spike_WT_6P - Spike_WT_2P	2	0.00128783	0.0141497	-0.0772968	0.0485193	-0.0616338	0.0485193	-0.0123268	0.00970386	Not corrected	0.344898	0	Non significant
	569	583	IADTTDAVRDPQTLE	13	Spike_WT_6P - Spike_WT_2P	2	0.00132	0.00560176	-0.0744615	0.0273283	-0.162488	0.0546565	-0.0124991	0.00420435	Not corrected	0.186462	0	Non significant
	575	582	AVRDPQTL	6	Spike_WT_6P - Spike_WT_2P	2	-0.00448633	0.0269633	0.0532873	0.0268249	0.087451	0.0268249	0.0145752	0.00447082	Not corrected	0.0619819	0	Non significant
	575	583	AVRDPQTLE	7	Spike_WT_6P - Spike_WT_2P	2	0.0425168	0.0384884	-0.0164563	0.0370625	0.0120584	0.074125	0.00172262	0.0105893	Not corrected	0.883005	0	Non significant
	575	584	AVRDPQTLEI	8	Spike_WT_6P - Spike_WT_2P	2	0.0282777	0.02192	0.0312093	0.0173648	0.0353881	0.0347296	0.00442351	0.0043412	Not corrected	0.318852	0	Non significant
	586	592	DITPCSF	5	Spike_WT_6P - Spike_WT_2P	2	0.020697	0.0111429	0.0154485	0.0531523	0.0160001	0.0531523	0.00320001	0.0106305	Not corrected	0.787024	0	Non significant
	627	633	DQLTPTW	5	Spike_WT_6P - Spike_WT_2P	2	0.0219325	0.00945986	0.049887	0.0304389	0.0643259	0.0304389	0.0128652	0.00608778	Not corrected	0.073859	0	Non significant
	627	635	DQLTPTWRV	7	Spike_WT_6P - Spike_WT_2P	2	0.0239585	0.0109128	0.0534113	0.0078055	0.0849468	0.015611	0.0121353	0.00223014	Not corrected	0.0730106	0	Non significant
	634	643	RVYSTGSNVF	9	Spike_WT_6P - Spike_WT_2P	2	0.0172168	0.00566255	0.0936663	0.0475302	0.0620396	0.0475302	0.00689329	0.00528113	Not corrected	0.30771	0	Non significant
	662	671	CDIPIGAGIC	8	Spike_WT_6P - Spike_WT_2P	2	0.0188545	0.0101778	-0.043949	0.0252556	-0.0470963	0.0252556	-0.00588704	0.00315696	Not corrected	0.164177	0	Non significant
	687	694	VASQSIIA	7	Spike_WT_6P - Spike_WT_2P	2	0.00400083	0.00325636	0.0617177	0.0323138	0.0147016	0.0323138	0.00210023	0.00461626	Not corrected	0.62796	0	Non significant
	688	694	ASQSIIA	6	Spike_WT_6P - Spike_WT_2P	2	0.0034965	0.00495091	-0.024842	0.0446663	-0.0459681	0.0446663	-0.00766135	0.00744438	Not corrected	0.414529	0	Non significant
	691	695	SIIAY	4	Spike_WT_6P - Spike_WT_2P	2	0.0410562	0.0464708	-0.0422497	0.0248579	-0.0441649	0.0248579	-0.0110412	0.00621448	Not corrected	0.0955764	0	Non significant
	695	699	YTMSL	4	Spike_WT_6P - Spike_WT_2P	2	0.022306	0.0119615	-0.0186582	0.0186551	0.014564	0.0186551	0.00364101	0.00466378	Not corrected	0.340024	0	Non significant
	719	723	TISVT	4	Spike_WT_6P - Spike_WT_2P	2	-0.00825833	0.0335982	0.008879	0.00508437	0.0558032	0.00508437	0.0139508	0.00127109	Not corrected	0.000878795	0	Non significant
	722	727	VTTEIL	5	Spike_WT_6P - Spike_WT_2P	2	0.0338587	0.0362652	-0.0437658	0.012773	-0.0781335	0.012773	-0.0156267	0.0025546	Not corrected	0.010952	0	Non significant
	724	730	TEILPVS	5	Spike_WT_6P - Spike_WT_2P	2	0.00534633	0.00566697	-0.089082	0.0852438	-0.112998	0.0852438	-0.0225997	0.0170488	Not corrected	0.309211	0	Non significant
	724	731	TEILPVSM	6	Spike_WT_6P - Spike_WT_2P	2	0.008878	0.0170774	0.046213	0.0590395	-0.0160482	0.0590395	-0.00267469	0.00983991	Not corrected	0.8055	0	Non significant
	725	731	EILPVSM	5	Spike_WT_6P - Spike_WT_2P	2	0.02141	0.00956271	0.0047645	0.00952669	-0.0185191	0.00952669	-0.00370382	0.00190534	Not corrected	0.0850367	0	Non significant
	753	759	LLQYGSF	6	Spike_WT_6P - Spike_WT_2P	2	0.023818	0.00684385	0.00604433	0.0368427	0.0206836	0.0368427	0.00344727	0.00614045	Not corrected	0.481432	0	Non significant
	754	759	LQYGSF	5	Spike_WT_6P - Spike_WT_2P	2	0.0250957	0.0142237	0.00877317	0.0273858	0.0017263	0.0273858	0.00034526	0.00547717	Not corrected	0.933361	0	Non significant
	764	771	NRALTGIA	7	Spike_WT_6P - Spike_WT_2P	2	0.007086	0.00430583	0.021942	0.0115901	0.0109304	0.0115901	0.00156149	0.00165573	Not corrected	0.266526	0	Non significant
	770	782	IAVEQDKNTQEVF	12	Spike_WT_6P - Spike_WT_2P	2	0.00949117	0.00528465	-0.00761883	0.00783904	0.0152204	0.0235171	0.00126836	0.00195976	Not corrected	0.468807	0	Non significant
	772	782	VEQDKNTQEVF	10	Spike_WT_6P - Spike_WT_2P	2	0.0136685	0.00368483	0.0281442	0.0121936	0.0717057	0.0243873	0.00717057	0.00243873	Not corrected	0.0248891	0	Non significant
	774	782	QDKNTQEVF	8	Spike_WT_6P - Spike_WT_2P	2	0.0097225	0.00313807	0.0336233	0.0172409	0.017752	0.0344819	0.002219	0.00431023	Not corrected	0.534559	0	Non significant
	818	822	IEDLL	4	Spike_WT_6P - Spike_WT_2P	2	0.0269793	0.0081629	-0.0387457	0.00611605	0.0119376	0.00611605	0.00298441	0.00152901	Not corrected	0.155049	0	Non significant
	821	828	LLFNKVTL	7	Spike_WT_6P - Spike_WT_2P	2	0.0258147	0.00462202	0.0333902	0.017579	0.118112	0.0351581	0.0168731	0.00502258	Not corrected	0.0191533	0	Non significant
	822	828	LFNKVTL	6	Spike_WT_6P - Spike_WT_2P	2	0.0418933	0.0444333	0.0258318	0.0173403	0.0568371	0.0346805	0.00947286	0.00578008	Not corrected	0.202353	0	Non significant
	823	828	FNKVTL	5	Spike_WT_6P - Spike_WT_2P	2	0.01086	0.00437634	0.001419	0.0160239	0.0109385	0.0320479	0.00218769	0.00640958	Not corrected	0.706683	0	Non significant
	823	832	FNKVTLADAG	9	Spike_WT_6P - Spike_WT_2P	2	0.007256	0.00301226	0.0014905	0.0189385	0.0798057	0.0378769	0.0088673	0.00420855	Not corrected	0.137344	0	Non significant
	823	833	FNKVTLADAGF	10	Spike_WT_6P - Spike_WT_2P	2	0.0192202	0.00726071	0.055843	0.042936	0.0940419	0.085872	0.00940419	0.0085872	Not corrected	0.231866	0	Non significant
	829	833	ADAGF	4	Spike_WT_6P - Spike_WT_2P	2	0.0040195	0.00280068	0.0238775	0.0295204	0.0291388	0.0295204	0.00728469	0.00738011	Not corrected	0.2621	0	Non significant
	859	865	TVLPPLL	4	Spike_WT_6P - Spike_WT_2P	2	0.025406	0.00814829	0.0106293	0.0229776	0.0383123	0.0229776	0.00957807	0.0057444	Not corrected	0.0973035	0	Non significant
	859	866	TVLPPLLT	5	Spike_WT_6P - Spike_WT_2P	2	0.0215288	0.00591222	0.0169065	0.0433149	-0.0177056	0.0433149	-0.00354112	0.00866299	Not corrected	0.611875	0	Non significant
	870	877	IAQYTSAL	7	Spike_WT_6P - Spike_WT_2P	2	0.0104157	0.00265934	-0.0371575	0.0243278	-0.0131735	0.0243278	-0.00188193	0.0034754	Not corrected	0.489279	0	Non significant
	873	877	YTSAL	4	Spike_WT_6P - Spike_WT_2P	2	0.00606333	0.0027123	-0.0110638	0.0109901	0.00301739	0.0109901	0.000754349	0.00274752	Not corrected	0.787846	0	Non significant
	873	878	YTSALL	5	Spike_WT_6P - Spike_WT_2P	2	0.0275495	0.0157966	-0.0693025	0.0271097	-0.022878	0.0271097	-0.00457561	0.00542193	Not corrected	0.477308	0	Non significant
	878	885	LAGTITSG	7	Spike_WT_6P - Spike_WT_2P	2	0.0403973	0.0286562	-0.158564	0.148554	-0.127351	0.148554	-0.0181931	0.021222	Not corrected	0.46591	0	Non significant
	886	891	WTFGAG	5	Spike_WT_6P - Spike_WT_2P	2	0.0242105	0.00898933	0.0255655	0.0711549	0.00617354	0.0711549	0.00123471	0.014231	Not corrected	0.905402	0	Non significant
	902	906	MAYRF	4	Spike_WT_6P - Spike_WT_2P	2	0.019191	0.0034294	0.010469	0.0250465	0.072382	0.0250465	0.0180955	0.00626162	Not corrected	0.129134	0	Non significant
	902	916	MAYRFNGIGVTQNVL	14	Spike_WT_6P - Spike_WT_2P	2	0.02368	0.00403006	-0.077047	0.075588	-0.11464	0.151176	-0.0081886	0.0107983	Not corrected	0.386912	0	Non significant
	903	916	AYRFNGIGVTQNVL	13	Spike_WT_6P - Spike_WT_2P	2	0.0224915	0.0100453	-0.00361633	0.055865	0.0680755	0.11173	0.00523658	0.00859462	Not corrected	0.518997	0	Non significant
	904	916	YRFNGIGVTQNVL	12	Spike_WT_6P - Spike_WT_2P	2	0.0242612	0.00884292	0.0284477	0.0488431	0.0993765	0.0976861	0.00828137	0.00814051	Not corrected	0.339843	0	Non significant
	907	913	NGIGVTQ	6	Spike_WT_6P - Spike_WT_2P	2	-0.0236022	0.0613815	0.00499133	0.0798942	0.0403023	0.0798942	0.00671705	0.0133157	Not corrected	0.606886	0	Non significant
	909	916	IGVTQNVL	7	Spike_WT_6P - Spike_WT_2P	2	0.0441298	0.0531071	-9e-06	0.0427242	-0.00504802	0.0427242	-0.000721146	0.00610346	Not corrected	0.87257	0	Non significant
	911	916	VTQNVL	5	Spike_WT_6P - Spike_WT_2P	2	0.00780033	0.00280588	-0.0444598	0.0304031	0.023698	0.0304031	0.0047396	0.00608062	Not corrected	0.539727	0	Non significant
	917	922	YENQKL	5	Spike_WT_6P - Spike_WT_2P	2	0.0917035	0.0569122	-0.0174478	0.0297216	0.0344514	0.0297216	0.00689029	0.00594432	Not corrected	0.20784	0	Non significant
	917	924	YENQKLIA	7	Spike_WT_6P - Spike_WT_2P	2	0.00620183	0.00230765	-0.00446783	0.0182157	0.00758842	0.0364315	0.00108406	0.0052045	Not corrected	0.853794	0	Non significant
	923	927	IANQF	4	Spike_WT_6P - Spike_WT_2P	2	0.007225	0.0029884	-0.0133507	0.02387	-0.0294039	0.02387	-0.00735097	0.0059675	Not corrected	0.355724	0	Non significant
	923	930	IANQFNSA	7	Spike_WT_6P - Spike_WT_2P	2	-0.0006065	0.00410338	-0.0279845	0.0917876	0.0146178	0.0917876	0.00208826	0.0131125	Not corrected	0.880894	0	Non significant
	923	938	IANQFNSAIGKIQDSL	15	Spike_WT_6P - Spike_WT_2P	2	0.0146025	0.00581735	0.0506318	0.0455561	0.0859137	0.0911123	0.00572758	0.00607415	Not corrected	0.460854	0	Non significant
	925	938	NQFNSAIGKIQDSL	13	Spike_WT_6P - Spike_WT_2P	2	0.0173517	0.00340134	0.106934	0.0618867	0.272611	0.123773	0.0209701	0.00952103	Not corrected	0.0682043	0	Non significant
	928	936	NSAIGKIQD	8	Spike_WT_6P - Spike_WT_2P	2	-0.0254172	0.0646787	-0.0320537	0.0768526	-0.00518178	0.153705	-0.000647723	0.0192132	Not corrected	0.975666	0	Non significant
	928	938	NSAIGKIQDSL	10	Spike_WT_6P - Spike_WT_2P	2	0.0701018	0.0926777	0.0425953	0.0240681	0.149293	0.0481363	0.0149293	0.00481363	Not corrected	0.040672	0	Non significant
	931	938	IGKIQDSL	7	Spike_WT_6P - Spike_WT_2P	2	0.00851317	0.00473638	0.0270827	0.0133929	0.0687504	0.0267858	0.00982149	0.00382655	Not corrected	0.182574	0	Non significant
	946	954	GKLQDVVNQ	8	Spike_WT_6P - Spike_WT_2P	2	-0.00363133	0.0125126	-0.0308167	0.0303318	-0.115926	0.0606635	-0.0144908	0.00758294	Not corrected	0.264924	0	Non significant
	946	956	GKLQDVVNQNA	10	Spike_WT_6P - Spike_WT_2P	2	0.002782	0.0044692	0.0193335	0.0305889	0.0373938	0.0611777	0.00373938	0.00611777	Not corrected	0.472235	0	Non significant
	946	961	GKLQDVVNQNAQALNT	15	Spike_WT_6P - Spike_WT_2P	2	0.0037155	0.00559083	0.0156767	0.06977	0.0692091	0.13954	0.00461394	0.00930266	Not corrected	0.573043	0	Non significant
	947	955	KLQDVVNQN	8	Spike_WT_6P - Spike_WT_2P	2	0.0106858	0.00401688	0.0171142	0.0447957	0.0489934	0.0447957	0.00612417	0.00559947	Not corrected	0.227413	0	Non significant
	962	970	LVKQLSSNF	8	Spike_WT_6P - Spike_WT_2P	2	0.0118173	0.00330345	-0.0173157	0.0530619	0.0181761	0.0530619	0.00227201	0.00663273	Not corrected	0.648257	0	Non significant
	962	977	LVKQLSSNFGAISSVL	15	Spike_WT_6P - Spike_WT_2P	2	0.016622	0.00614023	-0.13103	0.156121	-0.239361	0.312241	-0.0159574	0.0208161	Not corrected	0.355425	0	Non significant
	963	970	VKQLSSNF	7	Spike_WT_6P - Spike_WT_2P	2	0.00928517	0.00456289	-0.0167215	0.0189113	-0.0707407	0.0378227	-0.0101058	0.00540324	Not corrected	0.0844899	0	Non significant
	971	977	GAISSVL	6	Spike_WT_6P - Spike_WT_2P	2	0.0254362	0.0256938	-0.0332902	0.0523601	0.000126889	0.0523601	2.11481e-05	0.00872668	Not corrected	0.997346	0	Non significant
	991	996	VQIDRL	5	Spike_WT_6P - Spike_WT_2P	2	0.0108255	0.00529164	-0.0514683	0.0477205	-0.0360088	0.0477205	-0.00720176	0.00954409	Not corrected	0.358543	0	Non significant
	993	1001	IDRLITGRL	8	Spike_WT_6P - Spike_WT_2P	2	0.0126535	0.00364025	-0.0607105	0.0294133	-0.121556	0.0588265	-0.0151945	0.00735332	Not corrected	0.176326	0	Non significant
	1007	1012	YVTQQL	5	Spike_WT_6P - Spike_WT_2P	2	0.00691367	0.00302074	-0.0193783	0.0107121	-0.0440569	0.0107121	-0.00881138	0.00214241	Not corrected	0.0197055	0	Non significant
	1016	1024	AEIRASANL	8	Spike_WT_6P - Spike_WT_2P	2	0.005784	0.0038174	0.008983	0.011612	0.0690575	0.011612	0.00863218	0.0014515	Not corrected	0.00525628	0	Non significant
	1018	1024	IRASANL	6	Spike_WT_6P - Spike_WT_2P	2	0.0332862	0.0227456	-0.0117378	0.0539602	0.0431888	0.0539602	0.00719814	0.00899336	Not corrected	0.38809	0	Non significant
	1050	1062	MSFPQSAPHGVVF	10	Spike_WT_6P - Spike_WT_2P	2	0.0263407	0.00886034	0.00699033	0.0277639	0.0277869	0.0555278	0.00277869	0.00555278	Not corrected	0.597991	0	Non significant
	1050	1063	MSFPQSAPHGVVFL	11	Spike_WT_6P - Spike_WT_2P	2	0.0220453	0.00588867	-0.026651	0.012125	-0.0245402	0.0242499	-0.00223093	0.00220454	Not corrected	0.240618	0	Non significant
	1090	1095	PREGVF	4	Spike_WT_6P - Spike_WT_2P	2	0.018084	0.00157154	0.0508045	0.0140219	0.0741389	0.0140219	0.0185347	0.00350548	Not corrected	0.100365	0	Non significant
	1103	1116	FVTQRNFYEPQIIT	12	Spike_WT_6P - Spike_WT_2P	2	0.0240905	0.0159211	0.0174425	0.0468982	0.0260081	0.0937964	0.00216735	0.00781637	Not corrected	0.793717	0	Non significant
	1103	1117	FVTQRNFYEPQIITT	13	Spike_WT_6P - Spike_WT_2P	2	0.021829	0.0096217	0.0618587	0.00988532	0.0823833	0.0197706	0.00633718	0.00152082	Not corrected	0.0135169	0	Non significant
	1109	1117	FYEPQIITT	7	Spike_WT_6P - Spike_WT_2P	2	0.0218093	0.0147081	0.0130612	0.0495006	-0.0951631	0.0495006	-0.0135947	0.00707152	Not corrected	0.129183	0	Non significant
	1175	1186	SVVNIQKEIDRL	11	Spike_WT_6P - Spike_WT_2P	2	0.019042	0.00851495	-0.101553	0.0715924	-0.259715	0.214777	-0.0236104	0.0195252	Not corrected	0.297755	0	Non significant
	1177	1186	VNIQKEIDRL	9	Spike_WT_6P - Spike_WT_2P	2	0.0138815	0.00378822	-0.082073	0.034831	-0.11932	0.0696619	-0.0132578	0.00774022	Not corrected	0.298016	0	Non significant
	1179	1186	IQKEIDRL	7	Spike_WT_6P - Spike_WT_2P	2	0.00657133	0.00310344	-0.127632	0.0206883	-0.296099	0.0413765	-0.0422999	0.00591093	Not corrected	0.0478266	0	Non significant
	1187	1197	NEVAKNLNESL	10	Spike_WT_6P - Spike_WT_2P	2	0.00810667	0.00625023	-0.100782	0.0602369	-0.170806	0.120474	-0.0170806	0.0120474	Not corrected	0.15692	0	Non significant
	1189	1197	VAKNLNESL	8	Spike_WT_6P - Spike_WT_2P	2	0.006612	0.00345399	-0.053261	0.00153522	-0.128703	0.00307045	-0.0160879	0.000383806	Not corrected	0.0126428	0	Non significant
	1198	1202	IDLQE	4	Spike_WT_6P - Spike_WT_2P	2	0.0018395	0.00280376	-0.013547	0.0175795	0.00797257	0.0175795	0.00199314	0.00439487	Not corrected	0.564378	0	Non significant
	1201	1208	QELGKYEQ	7	Spike_WT_6P - Spike_WT_2P	2	0.0155638	0.0125615	-0.00373817	0.0415631	-0.0178705	0.0831261	-0.00255293	0.0118752	Not corrected	0.789692	0	Non significant
	1201	1209	QELGKYEQY	8	Spike_WT_6P - Spike_WT_2P	2	0.005736	0.00460307	0.001016	0.0303955	0.0344853	0.0607911	0.00431067	0.00759889	Not corrected	0.470557	0	Non significant
	1224	1228	GSGYI	4	Spike_WT_6P - Spike_WT_2P	2	0.017863	0.00610925	-0.0436332	0.0265601	0.0157169	0.0265601	0.00392923	0.00664004	Not corrected	0.455968	0	Non significant
	1238	1245	YVRKDGEW	7	Spike_WT_6P - Spike_WT_2P	2	0.0142552	0.00338004	0.002712	0.0106531	0.00283137	0.0213063	0.000404481	0.00304375	Not corrected	0.855977	0	Non significant
	1246	1250	VLLST	4	Spike_WT_6P - Spike_WT_2P	2	0.004423	0.00302321	-0.0333298	0.0186384	-0.0032748	0.0186384	-0.0008187	0.00465961	Not corrected	0.874464	0	Non significant
	1246	1251	VLLSTF	5	Spike_WT_6P - Spike_WT_2P	2	0.0256707	0.00666901	-0.0692828	0.0378823	-0.0702917	0.0378823	-0.0140583	0.00757646	Not corrected	0.290006	0	Non significant
	21	31	RTQLPPAYTNS	8	Spike_WT_6P - Spike_WT_2P	10	0.0314855	0.0290056	-0.0637572	0.0673158	-0.132158	0.134632	-0.0165198	0.016829	Not corrected	0.408286	0	Non significant
	32	42	FTRGVYYPDKV	9	Spike_WT_6P - Spike_WT_2P	10	0.0208805	0.0240843	-0.0470853	0.0959861	-0.122961	0.191972	-0.0136624	0.0213303	Not corrected	0.610049	0	Non significant
	32	43	FTRGVYYPDKVF	10	Spike_WT_6P - Spike_WT_2P	10	0.0465855	0.0199499	-0.0320853	0.0745586	-0.0892401	0.223676	-0.00892401	0.0223676	Not corrected	0.737131	0	Non significant
	32	48	FTRGVYYPDKVFRSSVL	15	Spike_WT_6P - Spike_WT_2P	10	0.0483187	0.0243828	-0.0283587	0.092881	-0.129022	0.371524	-0.00860144	0.0247683	Not corrected	0.767755	0	Non significant
	36	43	VYYPDKVF	6	Spike_WT_6P - Spike_WT_2P	10	0.0469678	0.0343446	-0.0316885	0.0594739	-0.109649	0.118948	-0.0182748	0.0198246	Not corrected	0.45399	0	Non significant
	36	48	VYYPDKVFRSSVL	11	Spike_WT_6P - Spike_WT_2P	10	0.0522725	0.0476697	-0.0529043	0.102301	-0.139945	0.306902	-0.0127222	0.0279002	Not corrected	0.699726	0	Non significant
	43	48	FRSSVL	5	Spike_WT_6P - Spike_WT_2P	10	0.0257697	0.0147482	-0.13621	0.197768	-0.124611	0.197768	-0.0249222	0.0395537	Not corrected	0.615354	0	Non significant
	49	55	HSTQDLF	6	Spike_WT_6P - Spike_WT_2P	10	0.0408722	0.0221639	0.0604482	0.0210983	0.0827008	0.0210983	0.0137835	0.00351639	Not corrected	0.140853	0	Non significant
	92	103	FASTEKSNIIRG	11	Spike_WT_6P - Spike_WT_2P	10	0.0531545	0.0518682	-0.0230725	0.0433655	0.0483461	0.0867309	0.0043951	0.00788463	Not corrected	0.641315	0	Non significant
	92	106	FASTEKSNIIRGWIF	14	Spike_WT_6P - Spike_WT_2P	10	0.037193	0.025958	0.0745255	0.00653243	0.253351	0.0195973	0.0180965	0.00139981	Not corrected	0.000357623	0	Non significant
	92	110	FASTEKSNIIRGWIFGTTL	18	Spike_WT_6P - Spike_WT_2P	10	0.0310298	0.0145716	0.00842783	0.0182182	0.0896519	0.0546547	0.00498066	0.00303637	Not corrected	0.322485	0	Non significant
	93	103	ASTEKSNIIRG	10	Spike_WT_6P - Spike_WT_2P	10	0.0531087	0.0515626	0.035274	0.0501339	0.117843	0.100268	0.0117843	0.0100268	Not corrected	0.324814	0	Non significant
	94	103	STEKSNIIRG	9	Spike_WT_6P - Spike_WT_2P	10	0.0525632	0.0505699	0.0118398	0.0600316	0.0373646	0.120063	0.00415162	0.0133403	Not corrected	0.772123	0	Non significant
	104	110	WIFGTTL	6	Spike_WT_6P - Spike_WT_2P	10	0.0412362	0.0202285	0.0638162	0.110006	0.0921829	0.110006	0.0153638	0.0183343	Not corrected	0.480464	0	Non significant
	111	117	DSKTQSL	6	Spike_WT_6P - Spike_WT_2P	10	0.079241	0.0766343	-0.025704	0.0754227	0.0434103	0.0754227	0.00723505	0.0125704	Not corrected	0.619114	0	Non significant
	192	199	FVFKNIDG	7	Spike_WT_6P - Spike_WT_2P	10	0.0396537	0.0214707	-0.053071	0.0834261	-0.0788387	0.166852	-0.0112627	0.023836	Not corrected	0.689992	0	Non significant
	192	201	FVFKNIDGYF	9	Spike_WT_6P - Spike_WT_2P	10	0.0295538	0.0231249	-0.0353227	0.0709869	-0.0681471	0.141974	-0.0075719	0.0157749	Not corrected	0.690678	0	Non significant
	201	212	FKIYSKHTPINL	10	Spike_WT_6P - Spike_WT_2P	10	0.0216007	0.0128895	-0.0542042	0.0334095	-0.0814381	0.066819	-0.00814381	0.0066819	Not corrected	0.373116	0	Non significant
	202	212	KIYSKHTPINL	9	Spike_WT_6P - Spike_WT_2P	10	0.021918	0.0199158	-0.181161	0.105359	-0.163673	0.105359	-0.0181859	0.0117065	Not corrected	0.310003	0	Non significant
	213	220	VRDLPQGF	6	Spike_WT_6P - Spike_WT_2P	10	0.0345178	0.0227357	-0.0795642	0.0333234	-0.0353863	0.0333234	-0.00589772	0.0055539	Not corrected	0.35102	0	Non significant
	221	228	SALEPLVD	6	Spike_WT_6P - Spike_WT_2P	10	0.0323092	0.0198449	0.01006	0.0658644	-0.00108493	0.0658644	-0.000180822	0.0109774	Not corrected	0.987959	0	Non significant
	236	241	TRFQTL	5	Spike_WT_6P - Spike_WT_2P	10	0.020096	0.013885	-0.0495868	0.230274	-0.0535602	0.230274	-0.010712	0.0460549	Not corrected	0.840818	0	Non significant
	245	264	HRSYLTPGDSSSGWTAGAAA	18	Spike_WT_6P - Spike_WT_2P	10	0.0153805	0.0121412	-0.0759507	0.0377544	-0.192695	0.113263	-0.0107053	0.0062924	Not corrected	0.0984342	0	Non significant
	258	264	WTAGAAA	6	Spike_WT_6P - Spike_WT_2P	10	0.0208027	0.0175874	-0.267143	0.167047	-0.258699	0.167047	-0.0431164	0.0278411	Not corrected	0.328191	0	Non significant
	265	276	YYVGYLQPRTFL	10	Spike_WT_6P - Spike_WT_2P	10	0.0303598	0.0285369	0.0642323	0.0317001	0.0881034	0.0317001	0.00881034	0.00317001	Not corrected	0.0940511	0	Non significant
	266	276	YVGYLQPRTFL	9	Spike_WT_6P - Spike_WT_2P	10	0.046623	0.00767888	0.036434	0.120442	0.0480659	0.120442	0.00534066	0.0133824	Not corrected	0.72486	0	Non significant
	267	276	VGYLQPRTFL	8	Spike_WT_6P - Spike_WT_2P	10	0.0245532	0.0351706	-0.0202678	0.0743483	0.0422245	0.148697	0.00527807	0.0185871	Not corrected	0.804368	0	Non significant
	269	276	YLQPRTFL	6	Spike_WT_6P - Spike_WT_2P	10	0.0583153	0.0200076	0.00487967	0.0307578	0.0213688	0.0615156	0.00356147	0.0102526	Not corrected	0.765665	0	Non significant
	306	313	FTVEKGIY	7	Spike_WT_6P - Spike_WT_2P	10	0.034807	0.0250669	0.065623	0.124034	0.0674926	0.124034	0.0096418	0.0177191	Not corrected	0.642492	0	Non significant
	306	317	FTVEKGIYQTSN	11	Spike_WT_6P - Spike_WT_2P	10	0.0113242	0.0117114	-0.103449	0.116746	-0.179262	0.233493	-0.0162966	0.0212266	Not corrected	0.548467	0	Non significant
	314	318	QTSNF	4	Spike_WT_6P - Spike_WT_2P	10	0.0327477	0.0233468	-0.108189	0.072706	-0.0789656	0.072706	-0.0197414	0.0181765	Not corrected	0.436523	0	Non significant
	318	325	FRVQPTES	6	Spike_WT_6P - Spike_WT_2P	10	0.058329	0.0535255	-0.114809	0.0687587	-0.21138	0.137517	-0.03523	0.0229196	Not corrected	0.340847	0	Non significant
	369	374	YNSASF	5	Spike_WT_6P - Spike_WT_2P	10	0.0164558	0.0131229	-0.149934	0.138343	-0.125412	0.138343	-0.0250825	0.0276687	Not corrected	0.496729	0	Non significant
	388	392	NDLCF	4	Spike_WT_6P - Spike_WT_2P	10	0.0209575	0.0234925	-0.111088	0.0809904	-0.0899713	0.0809904	-0.0224928	0.0202476	Not corrected	0.370906	0	Non significant
	396	400	YADSF	4	Spike_WT_6P - Spike_WT_2P	10	0.02722	0.0197074	-0.0104418	0.0180056	0.0172049	0.0180056	0.00430123	0.0045014	Not corrected	0.271095	0	Non significant
	400	406	FVIRGDE	6	Spike_WT_6P - Spike_WT_2P	10	0.0216918	0.0133311	0.0125665	0.00788271	-0.0160833	0.00788271	-0.00268055	0.00131378	Not corrected	0.0663351	0	Non significant
	401	420	VIRGDEVRQIAPGQTGKIAD	18	Spike_WT_6P - Spike_WT_2P	10	0.0102313	0.0142684	-0.0139532	0.0408399	-0.0193793	0.12252	-0.00107663	0.00680665	Not corrected	0.889081	0	Non significant
	401	422	VIRGDEVRQIAPGQTGKIADYN	20	Spike_WT_6P - Spike_WT_2P	10	-0.004511	0	0.022909	0	0.0528511	0	0.00264256	0	Not corrected	0	0	Non significant
	407	420	VRQIAPGQTGKIAD	12	Spike_WT_6P - Spike_WT_2P	10	0.0284235	0.0136977	-0.093498	0.0794426	-0.210158	0.158885	-0.0175132	0.0132404	Not corrected	0.377288	0	Non significant
	407	421	VRQIAPGQTGKIADY	13	Spike_WT_6P - Spike_WT_2P	10	0.00756	0.00826136	-0.034378	0.0958431	0.00571156	0.191686	0.000439351	0.0147451	Not corrected	0.97763	0	Non significant
	407	422	VRQIAPGQTGKIADYN	14	Spike_WT_6P - Spike_WT_2P	10	0.0148067	0.0160293	-0.00945	0.0635669	-0.00121863	0.127134	-8.70452e-05	0.00908098	Not corrected	0.99331	0	Non significant
	421	429	YNYKLPDDF	7	Spike_WT_6P - Spike_WT_2P	10	0.0584645	0.0210238	-3.9e-05	0.0373831	-0.00547763	0.0747663	-0.000782518	0.0106809	Not corrected	0.940292	0	Non significant
	423	429	YKLPDDF	5	Spike_WT_6P - Spike_WT_2P	10	0.0474077	0.0247638	-0.0254522	0.026918	-0.0324946	0.0538361	-0.00649891	0.0107672	Not corrected	0.446269	0	Non significant
	442	452	DSKVGGNYNYL	10	Spike_WT_6P - Spike_WT_2P	10	0.033537	0.0207932	-0.146869	0.0845553	-0.326279	0.169111	-0.0326279	0.0169111	Not corrected	0.267951	0	Non significant
	443	452	SKVGGNYNYL	9	Spike_WT_6P - Spike_WT_2P	10	0.0105472	0.0346574	-0.0100688	0.130956	-0.0353592	0.261913	-0.0039288	0.0291014	Not corrected	0.906522	0	Non significant
	453	467	YRLFRKSNLKPFERD	13	Spike_WT_6P - Spike_WT_2P	10	0.0158687	0.0113168	0.00100283	0.0227744	0.0484286	0.0910975	0.00372528	0.0070075	Not corrected	0.624266	0	Non significant
	456	470	FRKSNLKPFERDIST	13	Spike_WT_6P - Spike_WT_2P	10	0.0124458	0.0205567	0.000843333	0.0197834	0.142675	0.0791337	0.010975	0.0060872	Not corrected	0.294646	0	Non significant
	456	471	FRKSNLKPFERDISTE	14	Spike_WT_6P - Spike_WT_2P	10	0.028536	0.0140514	-0.0286665	0.0252701	-0.0603797	0.10108	-0.00431283	0.00722004	Not corrected	0.60269	0	Non significant
	495	512	YGFQPTNGVGYQPYRVVV	15	Spike_WT_6P - Spike_WT_2P	10	0.0548907	0.0255152	0.0753102	0.116012	0.209226	0.232024	0.0139484	0.0154683	Not corrected	0.286728	0	Non significant
	516	533	ELLHAPATVCGPKKSTNL	15	Spike_WT_6P - Spike_WT_2P	10	0.0154175	0.00561346	0.000346	0.0857102	0.0250619	0.342841	0.00167079	0.022856	Not corrected	0.943953	0	Non significant
	542	552	NFNGLTGTGVL	10	Spike_WT_6P - Spike_WT_2P	10	0.0105185	0.0338331	-0.0549908	0.279423	0.00310191	0.279423	0.000310191	0.0279423	Not corrected	0.992238	0	Non significant
	546	552	LTGTGVL	6	Spike_WT_6P - Spike_WT_2P	10	0.0271028	0.0177	-0.0323058	0.0964396	-0.00644762	0.0964396	-0.0010746	0.0160733	Not corrected	0.944787	0	Non significant
	553	565	TESNKKFLPFQQF	11	Spike_WT_6P - Spike_WT_2P	10	0.083245	0.0354332	-0.195583	0.225228	-0.291687	0.450456	-0.026517	0.0409505	Not corrected	0.591156	0	Non significant
	569	574	IADTTD	5	Spike_WT_6P - Spike_WT_2P	10	0.0242862	0.00506461	-0.27899	0.159899	-0.263327	0.159899	-0.0526654	0.0319798	Not corrected	0.316556	0	Non significant
	569	583	IADTTDAVRDPQTLE	13	Spike_WT_6P - Spike_WT_2P	10	0.0006605	0.0119663	-0.077435	0.196626	-0.168435	0.393251	-0.0129565	0.0302501	Not corrected	0.719839	0	Non significant
	575	582	AVRDPQTL	6	Spike_WT_6P - Spike_WT_2P	10	0.0372305	0.0314127	-0.0483752	0.16415	-0.0142115	0.16415	-0.00236859	0.0273583	Not corrected	0.938524	0	Non significant
	575	583	AVRDPQTLE	7	Spike_WT_6P - Spike_WT_2P	10	0.0612215	0.0553199	0.026215	0.0895428	0.097401	0.179086	0.0139144	0.0255837	Not corrected	0.65755	0	Non significant
	575	584	AVRDPQTLEI	8	Spike_WT_6P - Spike_WT_2P	10	0.0347043	0.0221873	0.0441035	0.0980497	0.0611764	0.196099	0.00764705	0.0245124	Not corrected	0.788503	0	Non significant
	576	582	VRDPQTL	5	Spike_WT_6P - Spike_WT_2P	10	0.0656073	0.0602772	-0.0142652	0.176318	-0.016381	0.176318	-0.0032762	0.0352635	Not corrected	0.935431	0	Non significant
	627	633	DQLTPTW	5	Spike_WT_6P - Spike_WT_2P	10	0.037823	0.0173404	-0.0266452	0.106517	-0.0122063	0.106517	-0.00244126	0.0213034	Not corrected	0.915867	0	Non significant
	627	635	DQLTPTWRV	7	Spike_WT_6P - Spike_WT_2P	10	0.03111	0.00629783	0.028394	0.00215966	0.0349121	0.00431932	0.00498745	0.000617046	Not corrected	0.0405043	0	Non significant
	634	643	RVYSTGSNVF	9	Spike_WT_6P - Spike_WT_2P	10	0.035002	0.0232289	-0.0939242	0.194408	-0.125551	0.194408	-0.0139501	0.0216009	Not corrected	0.604877	0	Non significant
	662	671	CDIPIGAGIC	8	Spike_WT_6P - Spike_WT_2P	10	0.029227	0.00417379	-0.168566	0.143364	-0.171714	0.143364	-0.0214642	0.0179205	Not corrected	0.395432	0	Non significant
	687	694	VASQSIIA	7	Spike_WT_6P - Spike_WT_2P	10	0.0139198	0.0114458	-0.0831123	0.264917	-0.130128	0.264917	-0.0185898	0.0378453	Not corrected	0.683902	0	Non significant
	691	695	SIIAY	4	Spike_WT_6P - Spike_WT_2P	10	0.031726	0.0189126	-0.0471435	0.301879	-0.0490588	0.301879	-0.0122647	0.0754698	Not corrected	0.887807	0	Non significant
	695	699	YTMSL	4	Spike_WT_6P - Spike_WT_2P	10	0.038817	0.0179507	-0.0487368	0.123977	-0.0155146	0.123977	-0.00387866	0.0309943	Not corrected	0.913017	0	Non significant
	719	723	TISVT	4	Spike_WT_6P - Spike_WT_2P	10	0.0366357	0.0327461	-0.056601	0.0352403	-0.00967684	0.0352403	-0.00241921	0.00881008	Not corrected	0.802554	0	Non significant
	722	727	VTTEIL	5	Spike_WT_6P - Spike_WT_2P	10	0.0309995	0.0147243	-0.095782	0.0459225	-0.13015	0.0459225	-0.0260299	0.00918449	Not corrected	0.0350915	0	Non significant
	724	730	TEILPVS	5	Spike_WT_6P - Spike_WT_2P	10	0.025719	0.0176273	-0.015247	0.0232772	-0.0391634	0.0232772	-0.00783269	0.00465544	Not corrected	0.181984	0	Non significant
	724	731	TEILPVSM	6	Spike_WT_6P - Spike_WT_2P	10	0.0464827	0.0260862	0.00972167	0.0508551	-0.0525395	0.0508551	-0.00875658	0.00847585	Not corrected	0.32055	0	Non significant
	725	731	EILPVSM	5	Spike_WT_6P - Spike_WT_2P	10	0.045746	0.0229663	0.0769675	0.0169455	0.0536839	0.0169455	0.0107368	0.0033891	Not corrected	0.0513727	0	Non significant
	753	759	LLQYGSF	6	Spike_WT_6P - Spike_WT_2P	10	0.0159207	0.0290873	-0.121279	0.172451	-0.10664	0.172451	-0.0177734	0.0287418	Not corrected	0.620107	0	Non significant
	754	759	LQYGSF	5	Spike_WT_6P - Spike_WT_2P	10	0.0428555	0.0210556	-0.16162	0.119228	-0.168667	0.119228	-0.0337335	0.0238457	Not corrected	0.362488	0	Non significant
	764	771	NRALTGIA	7	Spike_WT_6P - Spike_WT_2P	10	0.0257433	0.0175855	-0.0254118	0.155398	-0.0364234	0.155398	-0.00520335	0.0221997	Not corrected	0.839984	0	Non significant
	770	782	IAVEQDKNTQEVF	12	Spike_WT_6P - Spike_WT_2P	10	0.0273472	0.0215773	0.0207048	0.0113107	0.100191	0.0339321	0.00834928	0.00282768	Not corrected	0.064515	0	Non significant
	772	782	VEQDKNTQEVF	10	Spike_WT_6P - Spike_WT_2P	10	0.0237323	0.0143253	0.0261083	0.0381797	0.067634	0.0763593	0.0067634	0.00763593	Not corrected	0.290373	0	Non significant
	774	782	QDKNTQEVF	8	Spike_WT_6P - Spike_WT_2P	10	0.0246695	0.0180395	0.0730963	0.016791	0.096698	0.0335821	0.0120873	0.00419776	Not corrected	0.0414892	0	Non significant
	783	796	AQVKQIYKTPPIKD	11	Spike_WT_6P - Spike_WT_2P	10	0.0271458	0.0256786	-0.0507245	0.092564	-0.205673	0.277692	-0.0186976	0.0252447	Not corrected	0.564517	0	Non significant
	818	822	IEDLL	4	Spike_WT_6P - Spike_WT_2P	10	0.0306678	0.0110003	-0.091921	0.0344018	-0.0412377	0.0344018	-0.0103094	0.00860044	Not corrected	0.412636	0	Non significant
	821	828	LLFNKVTL	7	Spike_WT_6P - Spike_WT_2P	10	0.0205568	0.0381402	-0.0101997	0.0316686	0.0309321	0.0633371	0.00441887	0.00904816	Not corrected	0.685754	0	Non significant
	822	828	LFNKVTL	6	Spike_WT_6P - Spike_WT_2P	10	0.0444135	0.0202988	-0.0730942	0.0471397	-0.141015	0.0942793	-0.0235025	0.0157132	Not corrected	0.339791	0	Non significant
	823	828	FNKVTL	5	Spike_WT_6P - Spike_WT_2P	10	0.0196505	0.0109223	-0.0722013	0.0515817	-0.136302	0.103163	-0.0272604	0.0206327	Not corrected	0.365058	0	Non significant
	823	832	FNKVTLADAG	9	Spike_WT_6P - Spike_WT_2P	10	0.0105953	0.0116163	-0.114001	0.0374038	-0.151177	0.0748076	-0.0167975	0.00831196	Not corrected	0.236777	0	Non significant
	823	833	FNKVTLADAGF	10	Spike_WT_6P - Spike_WT_2P	10	0.0466885	0.0195075	-0.0526628	0.0114823	-0.12297	0.0229647	-0.012297	0.00229647	Not corrected	0.0945051	0	Non significant
	829	833	ADAGF	4	Spike_WT_6P - Spike_WT_2P	10	0.0161152	0.0125558	-0.147951	0.123562	-0.142689	0.123562	-0.0356723	0.0308906	Not corrected	0.422848	0	Non significant
	859	865	TVLPPLL	4	Spike_WT_6P - Spike_WT_2P	10	0.023307	0.0229225	0.00835833	0.0983628	0.0360413	0.0983628	0.00901032	0.0245907	Not corrected	0.756975	0	Non significant
	859	866	TVLPPLLT	5	Spike_WT_6P - Spike_WT_2P	10	0.0131057	0.0306375	0.0234005	0.183831	-0.0112116	0.183831	-0.00224232	0.0367663	Not corrected	0.957002	0	Non significant
	870	877	IAQYTSAL	7	Spike_WT_6P - Spike_WT_2P	10	0.024969	0.0197109	0.0751928	0.461588	0.0991768	0.461588	0.0141681	0.0659412	Not corrected	0.852088	0	Non significant
	873	877	YTSAL	4	Spike_WT_6P - Spike_WT_2P	10	0.0170953	0.00989196	-0.0626818	0.170624	-0.0486006	0.170624	-0.0121502	0.042656	Not corrected	0.806358	0	Non significant
	878	885	LAGTITSG	7	Spike_WT_6P - Spike_WT_2P	10	0.049515	0.0459594	-0.116859	0.367323	-0.085646	0.367323	-0.0122351	0.0524747	Not corrected	0.840434	0	Non significant
	886	891	WTFGAG	5	Spike_WT_6P - Spike_WT_2P	10	0.0453577	0.0225443	-0.0477987	0.0259817	-0.0671906	0.0259817	-0.0134381	0.00519634	Not corrected	0.0348145	0	Non significant
	886	893	WTFGAGAA	7	Spike_WT_6P - Spike_WT_2P	10	0.0438863	0.0208715	-0.0350745	0.102209	-0.024417	0.102209	-0.00348815	0.0146013	Not corrected	0.814065	0	Non significant
	902	906	MAYRF	4	Spike_WT_6P - Spike_WT_2P	10	0.0410478	0.0222894	-0.0126622	0.155066	0.0492508	0.155066	0.0123127	0.0387664	Not corrected	0.786112	0	Non significant
	903	916	AYRFNGIGVTQNVL	13	Spike_WT_6P - Spike_WT_2P	10	0.0515573	0.0228271	0.052666	0.315434	0.18064	0.630868	0.0138954	0.0485283	Not corrected	0.805517	0	Non significant
	904	916	YRFNGIGVTQNVL	12	Spike_WT_6P - Spike_WT_2P	10	0.0556922	0.0218172	-0.0291177	0.338781	-0.0157542	0.677563	-0.00131285	0.0564636	Not corrected	0.98372	0	Non significant
	907	913	NGIGVTQ	6	Spike_WT_6P - Spike_WT_2P	10	0.0456303	0.0406215	-0.0324748	0.201786	0.0028361	0.201786	0.000472684	0.033631	Not corrected	0.990176	0	Non significant
	909	916	IGVTQNVL	7	Spike_WT_6P - Spike_WT_2P	10	0.030203	0.0161723	-0.122556	0.320603	-0.127595	0.320603	-0.0182279	0.0458004	Not corrected	0.737837	0	Non significant
	911	916	VTQNVL	5	Spike_WT_6P - Spike_WT_2P	10	0.0169543	0.0114972	-0.117048	0.234179	-0.0488905	0.234179	-0.0097781	0.0468358	Not corrected	0.85409	0	Non significant
	917	922	YENQKL	5	Spike_WT_6P - Spike_WT_2P	10	0.0985557	0.0735485	-0.0177398	0.0927317	0.0341594	0.0927317	0.00683189	0.0185463	Not corrected	0.747849	0	Non significant
	917	924	YENQKLIA	7	Spike_WT_6P - Spike_WT_2P	10	0.0249193	0.0169757	0.0035385	0.0750588	0.0236011	0.150118	0.00337158	0.0214454	Not corrected	0.891248	0	Non significant
	923	927	IANQF	4	Spike_WT_6P - Spike_WT_2P	10	0.016524	0.0118177	-0.00122883	0.062437	-0.0172821	0.062437	-0.00432051	0.0156092	Not corrected	0.811377	0	Non significant
	923	938	IANQFNSAIGKIQDSL	15	Spike_WT_6P - Spike_WT_2P	10	0.000865667	0.0497315	0.0906003	0.02411	0.165851	0.0482201	0.0110567	0.00321467	Not corrected	0.0321216	0	Non significant
	925	938	NQFNSAIGKIQDSL	13	Spike_WT_6P - Spike_WT_2P	10	-0.00180433	0.0565936	0.0968442	0.0748847	0.252432	0.149769	0.0194178	0.0115207	Not corrected	0.157234	0	Non significant
	928	936	NSAIGKIQD	8	Spike_WT_6P - Spike_WT_2P	10	0.0462955	0.04776	-0.0442477	0.0642187	-0.0295698	0.128437	-0.00369622	0.0160547	Not corrected	0.791127	0	Non significant
	928	938	NSAIGKIQDSL	10	Spike_WT_6P - Spike_WT_2P	10	0.0370862	0.0219169	-1.25e-05	0.019604	0.0640776	0.0392079	0.00640776	0.00392079	Not corrected	0.102789	0	Non significant
	931	938	IGKIQDSL	7	Spike_WT_6P - Spike_WT_2P	10	0.0167272	0.0130846	-0.025011	0.0203177	-0.0354369	0.0406354	-0.00506242	0.00580505	Not corrected	0.29652	0	Non significant
	946	954	GKLQDVVNQ	8	Spike_WT_6P - Spike_WT_2P	10	0.0229332	0.0235611	-0.0270238	0.058393	-0.108341	0.116786	-0.0135426	0.0145982	Not corrected	0.400989	0	Non significant
	946	956	GKLQDVVNQNA	10	Spike_WT_6P - Spike_WT_2P	10	0.008956	0.017713	-0.0463638	0.0579138	-0.0940009	0.115828	-0.00940009	0.0115828	Not corrected	0.518814	0	Non significant
	946	961	GKLQDVVNQNAQALNT	15	Spike_WT_6P - Spike_WT_2P	10	0.00357517	0.0101012	0.003431	0.0653211	0.0447177	0.130642	0.00298118	0.00870948	Not corrected	0.756573	0	Non significant
	947	955	KLQDVVNQN	8	Spike_WT_6P - Spike_WT_2P	10	0.0290928	0.0229358	0.03499	0.0921117	0.0668692	0.0921117	0.00835865	0.011514	Not corrected	0.557877	0	Non significant
	951	961	VVNQNAQALNT	10	Spike_WT_6P - Spike_WT_2P	10	0.0811215	0.0756961	-0.0225697	0.0293634	-0.0385388	0.0587269	-0.00385388	0.00587269	Not corrected	0.577661	0	Non significant
	962	970	LVKQLSSNF	8	Spike_WT_6P - Spike_WT_2P	10	0.0300703	0.023322	-0.0374153	0.170519	-0.00192359	0.170519	-0.000240449	0.0213149	Not corrected	0.99209	0	Non significant
	962	977	LVKQLSSNFGAISSVL	15	Spike_WT_6P - Spike_WT_2P	10	0.0116815	0.0354111	0.233737	0.157713	0.490174	0.315426	0.0326783	0.0210284	Not corrected	0.335075	0	Non significant
	963	970	VKQLSSNF	7	Spike_WT_6P - Spike_WT_2P	10	0.0260042	0.0231016	-0.0416965	0.0640195	-0.120691	0.128039	-0.0172415	0.0182913	Not corrected	0.482762	0	Non significant
	971	977	GAISSVL	6	Spike_WT_6P - Spike_WT_2P	10	0.0371907	0.02547	-0.0443945	0.0877189	-0.0109774	0.0877189	-0.00182957	0.0146198	Not corrected	0.912542	0	Non significant
	991	996	VQIDRL	5	Spike_WT_6P - Spike_WT_2P	10	0.019656	0.0129103	-0.0511883	0.272362	-0.0357288	0.272362	-0.00714576	0.0544723	Not corrected	0.909007	0	Non significant
	993	1001	IDRLITGRL	8	Spike_WT_6P - Spike_WT_2P	10	0.0349722	0.0239719	-0.042334	0.25578	-0.084803	0.51156	-0.0106004	0.063945	Not corrected	0.885055	0	Non significant
	997	1001	ITGRL	4	Spike_WT_6P - Spike_WT_2P	10	0.0380027	0.0237996	-0.01267	0.215399	-0.0234569	0.215399	-0.00586422	0.0538498	Not corrected	0.920647	0	Non significant
	1002	1006	QSLQT	4	Spike_WT_6P - Spike_WT_2P	10	0.0210807	0.11784	0.11657	0.0927617	0.15527	0.0927617	0.0388175	0.0231904	Not corrected	0.180793	0	Non significant
	1007	1012	YVTQQL	5	Spike_WT_6P - Spike_WT_2P	10	0.012597	0.0128303	-0.0347105	0.0190857	-0.059389	0.0190857	-0.0118778	0.00381715	Not corrected	0.1058	0	Non significant
	1016	1024	AEIRASANL	8	Spike_WT_6P - Spike_WT_2P	10	0.018801	0.0162452	0.0476317	0.169428	0.107706	0.169428	0.0134633	0.0211785	Not corrected	0.61243	0	Non significant
	1018	1024	IRASANL	6	Spike_WT_6P - Spike_WT_2P	10	0.05216	0.0461068	0.0142445	0.182879	0.0691712	0.182879	0.0115285	0.0304798	Not corrected	0.746227	0	Non significant
	1050	1062	MSFPQSAPHGVVF	10	Spike_WT_6P - Spike_WT_2P	10	0.0619175	0.0280401	0.0215983	0.0292471	0.0570029	0.0584942	0.00570029	0.00584942	Not corrected	0.46327	0	Non significant
	1050	1063	MSFPQSAPHGVVFL	11	Spike_WT_6P - Spike_WT_2P	10	0.0233352	0.0286556	0.00883833	0.0168132	0.0464384	0.0336264	0.00422167	0.00305695	Not corrected	0.153811	0	Non significant
	1053	1062	PQSAPHGVVF	7	Spike_WT_6P - Spike_WT_2P	10	0.0389598	0.021809	-0.0101277	0.0216763	-0.0214273	0.0433527	-0.00306104	0.00619324	Not corrected	0.614807	0	Non significant
	1090	1095	PREGVF	4	Spike_WT_6P - Spike_WT_2P	10	0.0300068	0.0156622	-0.0513715	0.041988	-0.0280371	0.041988	-0.00700928	0.010497	Not corrected	0.570988	0	Non significant
	1103	1109	FVTQRNF	6	Spike_WT_6P - Spike_WT_2P	10	0.0270528	0.0277909	-0.0221672	0.164352	0.00837325	0.164352	0.00139554	0.027392	Not corrected	0.964414	0	Non significant
	1103	1116	FVTQRNFYEPQIIT	12	Spike_WT_6P - Spike_WT_2P	10	0.031037	0	0.135464	0	0.262051	0	0.0218376	0	Not corrected	0	0	Non significant
	1103	1117	FVTQRNFYEPQIITT	13	Spike_WT_6P - Spike_WT_2P	10	0.0481595	0.0256323	0.0761655	0.0390718	0.110997	0.0781436	0.00853823	0.00601104	Not corrected	0.262676	0	Non significant
	1109	1117	FYEPQIITT	7	Spike_WT_6P - Spike_WT_2P	10	0.0401637	0.0226496	-0.0597423	0.0891284	-0.167967	0.0891284	-0.0239952	0.0127326	Not corrected	0.280618	0	Non significant
	1175	1186	SVVNIQKEIDRL	11	Spike_WT_6P - Spike_WT_2P	10	0.05759	0.0315543	-0.016333	0.105829	-0.00405478	0.317486	-0.000368616	0.0288623	Not corrected	0.990577	0	Non significant
	1177	1186	VNIQKEIDRL	9	Spike_WT_6P - Spike_WT_2P	10	0.0386253	0.0268283	-0.206959	0.366922	-0.369092	0.733844	-0.0410102	0.0815382	Not corrected	0.679007	0	Non significant
	1179	1186	IQKEIDRL	7	Spike_WT_6P - Spike_WT_2P	10	0.0213953	0.0187452	-0.0421782	0.160234	-0.125192	0.320469	-0.0178846	0.0457813	Not corrected	0.74239	0	Non significant
	1187	1197	NEVAKNLNESL	10	Spike_WT_6P - Spike_WT_2P	10	0.0174952	0.0197566	-0.178375	0.276371	-0.325991	0.552742	-0.0325991	0.0552742	Not corrected	0.634079	0	Non significant
	1189	1197	VAKNLNESL	8	Spike_WT_6P - Spike_WT_2P	10	0.0230147	0.0157493	-0.0671942	0.0402743	-0.156569	0.0805486	-0.0195711	0.0100686	Not corrected	0.228152	0	Non significant
	1198	1202	IDLQE	4	Spike_WT_6P - Spike_WT_2P	10	0.0118403	0.0102582	-0.110436	0.153976	-0.0889164	0.153976	-0.0222291	0.0384941	Not corrected	0.635852	0	Non significant
	1201	1209	QELGKYEQY	8	Spike_WT_6P - Spike_WT_2P	10	0.00913667	0.0140087	-0.049995	0.0125108	-0.0675367	0.0250215	-0.00844208	0.00312769	Not corrected	0.152301	0	Non significant
	1224	1228	GSGYI	4	Spike_WT_6P - Spike_WT_2P	10	0.0296705	0.0177403	-0.0148788	0.0699104	0.0444712	0.0699104	0.0111178	0.0174776	Not corrected	0.611384	0	Non significant
	1238	1245	YVRKDGEW	7	Spike_WT_6P - Spike_WT_2P	10	0.0329265	0.0194624	-0.0563667	0.027318	-0.115326	0.054636	-0.0164751	0.00780515	Not corrected	0.229524	0	Non significant
	1246	1250	VLLST	4	Spike_WT_6P - Spike_WT_2P	10	0.017784	0.0148495	-0.0891328	0.0868861	-0.0590778	0.0868861	-0.0147695	0.0217215	Not corrected	0.589461	0	Non significant
	1246	1251	VLLSTF	5	Spike_WT_6P - Spike_WT_2P	10	0.0172682	0.0279099	0.0158803	0.0752742	0.0148714	0.0752742	0.00297429	0.0150548	Not corrected	0.848379	0	Non significant
