# Supplementary material for: Timeline of changes in spike conformational dynamics in emergent SARS-CoV-2 variants reveal progressive stabilization of trimer stalk with altered NTD dynamics
Source: eLife. 2023 Mar 17;12:e82584. doi: 10.7554/eLife.82584 (PMC10049203; doi:10.7554/eLife.82584)
Supplement: Figure 2—source data 4. [file elife-82584-fig2-data4.xlsx]

## Sheet: Figure 2- Source Data 4- WT inc
Protein	Start	End	Sequence	MaxUptake	State	Exposure	RT_diff_ave	RT_diff_SD	Center_diff_ave	Center_diff_SD	Uptake_diff_ave	Uptake_diff_SD	RU_diff_ave	RU_diff_SD	Correction	Welch_pValue	BH_sig	Significance
SARS-CoV-2	32	42	FTRGVYYPDKV	9	WT_3hrincubation - WT_Noincubation	1	0.0200483	0.0241046	-0.0833768	0.0311212	-0.0792354	0.0933637	-0.00880393	0.0103737	Not corrected	0.317714	0	Non significant
SARS-CoV-2	49	54	HSTQDL	5	WT_3hrincubation - WT_Noincubation	1	0.126634	0.0996582	0.0319562	0.0416222	0.099588	0.0416222	0.0199176	0.00832444	Not corrected	0.0617346	0	Non significant
SARS-CoV-2	49	55	HSTQDLF	6	WT_3hrincubation - WT_Noincubation	1	0.0297717	0.0330025	0.0129547	0.0511322	0.0118575	0.0511322	0.00197625	0.00852204	Not corrected	0.753767	0	Non significant
SARS-CoV-2	92	103	FASTEKSNIIRG	11	WT_3hrincubation - WT_Noincubation	1	0.0425795	0.013124	-0.195524	0.0269546	-0.197505	0.0539092	-0.017955	0.00490084	Not corrected	0.0157012	0	Non significant
SARS-CoV-2	92	106	FASTEKSNIIRGWIF	14	WT_3hrincubation - WT_Noincubation	1	-0.00615733	0.0397973	-0.021633	0.0183708	0.0547903	0.0551123	0.0039136	0.00393659	Not corrected	0.252143	0	Non significant
SARS-CoV-2	92	110	FASTEKSNIIRGWIFGTTL	18	WT_3hrincubation - WT_Noincubation	1	-0.0375435	0.0274328	-0.08303	0.0152779	-0.122744	0.0458338	-0.00681911	0.00254632	Not corrected	0.102414	0	Non significant
SARS-CoV-2	111	117	DSKTQSL	6	WT_3hrincubation - WT_Noincubation	1	0.161051	0.133825	0.000980167	0.067761	0.0628678	0.067761	0.010478	0.0112935	Not corrected	0.339019	0	Non significant
SARS-CoV-2	177	191	MDLEGKQGNFKNLRE	14	WT_3hrincubation - WT_Noincubation	1	0.0207213	0.0278143	-0.167501	0.0299047	-0.199629	0.089714	-0.0142592	0.00640814	Not corrected	0.0579869	0	Non significant
SARS-CoV-2	192	199	FVFKNIDG	7	WT_3hrincubation - WT_Noincubation	1	0.0165607	0.0292828	-0.0803055	0.05435	-0.135872	0.1087	-0.0194102	0.0155286	Not corrected	0.191102	0	Non significant
SARS-CoV-2	192	200	FVFKNIDGY	8	WT_3hrincubation - WT_Noincubation	1	0.00675833	0.0358375	-0.00654033	0.0401779	0.131207	0.0803559	0.0164009	0.0100445	Not corrected	0.101556	0	Non significant
SARS-CoV-2	192	201	FVFKNIDGYF	9	WT_3hrincubation - WT_Noincubation	1	-0.0171395	0.0406666	-0.0584213	0.014797	0.0501413	0.029594	0.00557125	0.00328823	Not corrected	0.0980801	0	Non significant
SARS-CoV-2	201	212	FKIYSKHTPINL	10	WT_3hrincubation - WT_Noincubation	1	0.0028655	0.0246798	-0.0475887	0.013938	0.0121481	0.0418141	0.00121481	0.00418141	Not corrected	0.707367	0	Non significant
SARS-CoV-2	202	212	KIYSKHTPINL	9	WT_3hrincubation - WT_Noincubation	1	0.0169277	0.019501	-0.0959732	0.0101947	-0.0774668	0.030584	-0.00860742	0.00339822	Not corrected	0.0591266	0	Non significant
SARS-CoV-2	213	220	VRDLPQGF	6	WT_3hrincubation - WT_Noincubation	1	0.0183647	0.0292004	-0.0954008	0.0159633	-0.0928114	0.0319265	-0.0154686	0.00532109	Not corrected	0.0450969	0	Non significant
SARS-CoV-2	221	228	SALEPLVD	6	WT_3hrincubation - WT_Noincubation	1	0.00214533	0.017578	0.0311908	0.0291227	0.0268422	0.0291227	0.0044737	0.00485378	Not corrected	0.305105	0	Non significant
SARS-CoV-2	265	276	YYVGYLQPRTFL	10	WT_3hrincubation - WT_Noincubation	1	-0.008167	0.0393244	-0.024927	0.0197133	0.155794	0.0394265	0.0155794	0.00394265	Not corrected	0.0193576	0	Non significant
SARS-CoV-2	266	276	YVGYLQPRTFL	9	WT_3hrincubation - WT_Noincubation	1	0.00378617	0.0365247	0.0114425	0.0248924	0.233702	0.0497847	0.0259669	0.00553164	Not corrected	0.0179741	0	Non significant
SARS-CoV-2	267	276	VGYLQPRTFL	8	WT_3hrincubation - WT_Noincubation	1	0.0270955	0.023022	0.007872	0.0430206	0.062057	0.0860412	0.00775713	0.0107551	Not corrected	0.550572	0	Non significant
SARS-CoV-2	269	276	YLQPRTFL	6	WT_3hrincubation - WT_Noincubation	1	0.0205117	0.0309535	0.0795055	0.024741	0.208702	0.0494821	0.0347837	0.00824701	Not corrected	0.0141494	0	Non significant
SARS-CoV-2	306	313	FTVEKGIY	7	WT_3hrincubation - WT_Noincubation	1	0.0376782	0.029457	-0.125494	0.0250476	-0.0797964	0.0500953	-0.0113995	0.00715647	Not corrected	0.23996	0	Non significant
SARS-CoV-2	306	317	FTVEKGIYQTSN	11	WT_3hrincubation - WT_Noincubation	1	0.0131403	0.024374	-0.0868863	0.0294992	-0.111746	0.0589984	-0.0101587	0.00536349	Not corrected	0.0736972	0	Non significant
SARS-CoV-2	306	318	FTVEKGIYQTSNF	12	WT_3hrincubation - WT_Noincubation	1	0.00357	0.0349664	0.0470953	0.0460495	0.304249	0.092099	0.0253541	0.00767492	Not corrected	0.0197699	0	Non significant
SARS-CoV-2	314	318	QTSNF	4	WT_3hrincubation - WT_Noincubation	1	0.0393548	0.0190295	0.148109	0.0130841	0.179118	0.0130841	0.0447796	0.00327103	Not corrected	0.000459851	0	Non significant
SARS-CoV-2	369	374	YNSASF	5	WT_3hrincubation - WT_Noincubation	1	0.0176243	0.0326872	-0.266119	0.0514387	-0.183121	0.0514387	-0.0366242	0.0102877	Not corrected	0.0227783	0	Non significant
SARS-CoV-2	400	406	FVIRGDE	6	WT_3hrincubation - WT_Noincubation	1	0.0321242	0.0186661	-0.0382825	0.00702379	-0.0128355	0.0140476	-0.00213925	0.00234126	Not corrected	0.283914	0	Non significant
SARS-CoV-2	401	422	VIRGDEVRQIAPGQTGKIADYN	20	WT_3hrincubation - WT_Noincubation	1	-0.016296	0	-0.046237	0	-0.207029	0	-0.0103515	0	Not corrected	0	0	Non significant
SARS-CoV-2	407	421	VRQIAPGQTGKIADY	13	WT_3hrincubation - WT_Noincubation	1	0.0087705	0.0223565	-0.0349383	0.055964	-0.000550415	0.111928	-4.23396e-05	0.00860984	Not corrected	0.994654	0	Non significant
SARS-CoV-2	407	422	VRQIAPGQTGKIADYN	14	WT_3hrincubation - WT_Noincubation	1	0.00977283	0.0241841	-0.114979	0.0554808	-0.130943	0.110962	-0.00935305	0.00792582	Not corrected	0.196323	0	Non significant
SARS-CoV-2	421	431	YNYKLPDDFTG	9	WT_3hrincubation - WT_Noincubation	1	-0.055572	0.0712952	0.00105517	0.0760741	0.0593092	0.152148	0.00658991	0.0169053	Not corrected	0.606719	0	Non significant
SARS-CoV-2	422	429	NYKLPDDF	6	WT_3hrincubation - WT_Noincubation	1	0.00648817	0.0367446	0.000233333	0.0172746	0.0300474	0.0345491	0.00500791	0.00575819	Not corrected	0.299402	0	Non significant
SARS-CoV-2	423	429	YKLPDDF	5	WT_3hrincubation - WT_Noincubation	1	0.00473	0.0319958	-0.0557643	0.0447269	-0.0286937	0.0894539	-0.00573874	0.0178908	Not corrected	0.668433	0	Non significant
SARS-CoV-2	423	431	YKLPDDFTG	7	WT_3hrincubation - WT_Noincubation	1	0.00895767	0.0321044	-0.467633	0.0772345	-0.836095	0.154469	-0.119442	0.022067	Not corrected	0.0127147	0	Non significant
SARS-CoV-2	453	467	YRLFRKSNLKPFERD	13	WT_3hrincubation - WT_Noincubation	1	0.0495725	0.0565637	-0.006913	0.015558	0.0346957	0.0466741	0.0026689	0.00359031	Not corrected	0.528018	0	Non significant
SARS-CoV-2	456	467	FRKSNLKPFERD	10	WT_3hrincubation - WT_Noincubation	1	0.014538	0.0468561	0.0137888	0.0635854	0.148937	0.127171	0.0148937	0.0127171	Not corrected	0.206229	0	Non significant
SARS-CoV-2	456	470	FRKSNLKPFERDIST	13	WT_3hrincubation - WT_Noincubation	1	0.0274147	0.0398127	-0.00386533	0.0131054	0.125334	0.0524217	0.00964111	0.00403244	Not corrected	0.20373	0	Non significant
SARS-CoV-2	456	471	FRKSNLKPFERDISTE	14	WT_3hrincubation - WT_Noincubation	1	-0.0542575	0.0803022	0.0276988	0.0293089	0.238779	0.117236	0.0170557	0.00837398	Not corrected	0.0873829	0	Non significant
SARS-CoV-2	495	510	YGFQPTNGVGYQPYRV	13	WT_3hrincubation - WT_Noincubation	1	0.010799	0.0357506	0.117117	0.0968548	0.322711	0.19371	0.0248239	0.0149007	Not corrected	0.116549	0	Non significant
SARS-CoV-2	511	515	VVLSF	4	WT_3hrincubation - WT_Noincubation	1	-0.0109335	0.0258941	-0.146729	0.0248727	-0.00475843	0.0248727	-0.00118961	0.00621817	Not corrected	0.79543	0	Non significant
SARS-CoV-2	544	552	NGLTGTGVL	8	WT_3hrincubation - WT_Noincubation	1	-0.00364233	0.0208344	0.0556018	0.0441067	-0.022913	0.0441067	-0.00286413	0.00551334	Not corrected	0.503007	0	Non significant
SARS-CoV-2	546	552	LTGTGVL	6	WT_3hrincubation - WT_Noincubation	1	0.0166872	0.0152561	0.004463	0.121237	0.0483206	0.121237	0.00805344	0.0202062	Not corrected	0.599662	0	Non significant
SARS-CoV-2	553	565	TESNKKFLPFQQF	11	WT_3hrincubation - WT_Noincubation	1	0.0077365	0.0356002	-0.304887	0.0501024	-0.805101	0.150307	-0.073191	0.0136643	Not corrected	0.0101632	0	Non significant
SARS-CoV-2	575	582	AVRDPQTL	6	WT_3hrincubation - WT_Noincubation	1	0.0453182	0.0189101	0.00874317	0.0293888	0.0356803	0.0293888	0.00594671	0.00489813	Not corrected	0.19556	0	Non significant
SARS-CoV-2	575	583	AVRDPQTLE	7	WT_3hrincubation - WT_Noincubation	1	0.0663077	0.0180761	-0.0747677	0.0169001	-0.0549916	0.0338002	-0.00785594	0.0048286	Not corrected	0.123482	0	Non significant
SARS-CoV-2	576	582	VRDPQTL	5	WT_3hrincubation - WT_Noincubation	1	0.0667585	0.00996216	-0.0254393	0.0289471	-0.0505102	0.0289471	-0.010102	0.00578941	Not corrected	0.112372	0	Non significant
SARS-CoV-2	576	583	VRDPQTLE	6	WT_3hrincubation - WT_Noincubation	1	0.039393	0.04957	0.045754	0.055816	0.118856	0.111632	0.0198094	0.0186053	Not corrected	0.244751	0	Non significant
SARS-CoV-2	586	592	DITPCSF	5	WT_3hrincubation - WT_Noincubation	1	-0.0267568	0.0259443	-0.343197	0.160766	-0.345965	0.160766	-0.0691931	0.0321531	Not corrected	0.0769601	0	Non significant
SARS-CoV-2	627	633	DQLTPTW	5	WT_3hrincubation - WT_Noincubation	1	-0.0291205	0.0335599	0.254209	0.0692622	0.284749	0.0692622	0.0569498	0.0138524	Not corrected	0.0118826	0	Non significant
SARS-CoV-2	716	720	TISVT	4	WT_3hrincubation - WT_Noincubation	1	0.0475573	0.0106648	-0.0624258	0.0142804	0.00993943	0.0142804	0.00248486	0.00357011	Not corrected	0.391242	0	Non significant
SARS-CoV-2	719	724	VTTEIL	5	WT_3hrincubation - WT_Noincubation	1	-0.000623	0.0102548	-0.075845	0.0653377	-0.0799821	0.0653377	-0.0159964	0.0130675	Not corrected	0.391975	0	Non significant
SARS-CoV-2	722	728	EILPVSM	5	WT_3hrincubation - WT_Noincubation	1	-0.003046	0.00705067	0.0621065	0.0104224	0.0484113	0.0104224	0.00968225	0.00208448	Not corrected	0.0628256	0	Non significant
SARS-CoV-2	750	756	LLQYGSF	6	WT_3hrincubation - WT_Noincubation	1	-0.0145195	0.034229	-0.283192	0.0938799	-0.199544	0.0938799	-0.0332573	0.0156466	Not corrected	0.08114	0	Non significant
SARS-CoV-2	751	756	LQYGSF	5	WT_3hrincubation - WT_Noincubation	1	-0.00355467	0.0365163	-0.0118102	0.037888	-0.0163067	0.037888	-0.00326135	0.0075776	Not corrected	0.606768	0	Non significant
SARS-CoV-2	761	768	NRALTGIA	7	WT_3hrincubation - WT_Noincubation	1	0.0860137	0.0163671	0.374386	0.0769517	0.0322928	0.0769517	0.00461326	0.0109931	Not corrected	0.582314	0	Non significant
SARS-CoV-2	767	779	IAVEQDKNTQEVF	12	WT_3hrincubation - WT_Noincubation	1	0.0223745	0.0249818	-0.0858175	0.0584355	0.0199799	0.116871	0.00166499	0.00973926	Not corrected	0.827096	0	Non significant
SARS-CoV-2	769	779	VEQDKNTQEVF	10	WT_3hrincubation - WT_Noincubation	1	0.0352475	0.0261939	-0.0679865	0.0421253	0.0184068	0.0842505	0.00184068	0.00842505	Not corrected	0.771971	0	Non significant
SARS-CoV-2	780	793	AQVKQIYKTPPIKD	11	WT_3hrincubation - WT_Noincubation	1	0.0027315	0.0309126	-0.324924	0.104535	-0.664496	0.209071	-0.0604088	0.0190064	Not corrected	0.02611	0	Non significant
SARS-CoV-2	815	819	IEDLL	4	WT_3hrincubation - WT_Noincubation	1	-0.006523	0.0269126	-0.141802	0.00813571	-0.00411808	0.00813571	-0.00102952	0.00203393	Not corrected	0.672498	0	Non significant
SARS-CoV-2	818	825	LLFNKVTL	7	WT_3hrincubation - WT_Noincubation	1	0.00872017	0.0282882	-0.0234553	0.0513303	0.0779113	0.102661	0.0111302	0.0146658	Not corrected	0.357872	0	Non significant
SARS-CoV-2	820	825	FNKVTL	5	WT_3hrincubation - WT_Noincubation	1	0.0275362	0.0215471	-0.0770548	0.0133672	-0.00611773	0.0267345	-0.00122355	0.0053469	Not corrected	0.762286	0	Non significant
SARS-CoV-2	820	830	FNKVTLADAGF	10	WT_3hrincubation - WT_Noincubation	1	-0.001351	0.0332463	0.0149747	0.0451827	0.175296	0.0903654	0.0175296	0.00903654	Not corrected	0.0698567	0	Non significant
SARS-CoV-2	826	830	ADAGF	4	WT_3hrincubation - WT_Noincubation	1	0.0240322	0.020611	-0.0936005	0.0456689	-0.101624	0.0456689	-0.0254059	0.0114172	Not corrected	0.0706248	0	Non significant
SARS-CoV-2	856	862	TVLPPLL	4	WT_3hrincubation - WT_Noincubation	1	-0.0254003	0.0232343	-0.315072	0.092855	-0.243163	0.092855	-0.0607907	0.0232138	Not corrected	0.0362936	0	Non significant
SARS-CoV-2	856	863	TVLPPLLT	5	WT_3hrincubation - WT_Noincubation	1	-0.0210795	0.0161578	-0.575271	0.137582	-0.588515	0.137582	-0.117703	0.0275164	Not corrected	0.013084	0	Non significant
SARS-CoV-2	867	874	IAQYTSAL	7	WT_3hrincubation - WT_Noincubation	1	0.00228117	0.0209853	-0.236054	0.0603189	-0.211501	0.0603189	-0.0302144	0.00861698	Not corrected	0.0592147	0	Non significant
SARS-CoV-2	870	874	YTSAL	4	WT_3hrincubation - WT_Noincubation	1	0.0294088	0.0177502	-0.259157	0.014702	-0.200641	0.014702	-0.0501601	0.0036755	Not corrected	0.000727215	0	Non significant
SARS-CoV-2	875	882	LAGTITSG	7	WT_3hrincubation - WT_Noincubation	1	0.0594298	0.00415822	-1.01811	0.247052	-0.979189	0.247052	-0.139884	0.0352931	Not corrected	0.0239849	0	Non significant
SARS-CoV-2	891	896	LQIPFA	4	WT_3hrincubation - WT_Noincubation	1	-0.0283893	0.0265037	-0.282757	0.0949479	-0.308466	0.0949479	-0.0771166	0.023737	Not corrected	0.0343907	0	Non significant
SARS-CoV-2	899	903	MAYRF	4	WT_3hrincubation - WT_Noincubation	1	0.0315013	0.0354178	-0.18346	0.0404846	-0.112598	0.0404846	-0.0281494	0.0101212	Not corrected	0.0431978	0	Non significant
SARS-CoV-2	899	913	MAYRFNGIGVTQNVL	14	WT_3hrincubation - WT_Noincubation	1	-0.006186	0.0310663	-0.244769	0.115078	-0.567022	0.230157	-0.0405016	0.0164398	Not corrected	0.0602246	0	Non significant
SARS-CoV-2	900	910	AYRFNGIGVTQ	10	WT_3hrincubation - WT_Noincubation	1	0.017921	0.0329648	-0.257234	0.0577693	-0.46737	0.115539	-0.046737	0.0115539	Not corrected	0.119846	0	Non significant
SARS-CoV-2	904	913	NGIGVTQNVL	9	WT_3hrincubation - WT_Noincubation	1	-0.005766	0.0208505	-0.62225	0.143251	-0.618189	0.143251	-0.0686876	0.0159168	Not corrected	0.0152272	0	Non significant
SARS-CoV-2	906	913	IGVTQNVL	7	WT_3hrincubation - WT_Noincubation	1	0.0058945	0.0177581	-0.516597	0.125569	-0.524277	0.125569	-0.0748967	0.0179385	Not corrected	0.0106094	0	Non significant
SARS-CoV-2	914	919	YENQKL	5	WT_3hrincubation - WT_Noincubation	1	0.165822	0.053433	-0.435401	0.0727038	-0.345174	0.0727038	-0.0690347	0.0145408	Not corrected	0.0147287	0	Non significant
SARS-CoV-2	920	924	IANQF	4	WT_3hrincubation - WT_Noincubation	1	0.0210885	0.0217227	-0.121532	0.0275423	-0.0395739	0.0275423	-0.00989348	0.00688558	Not corrected	0.148301	0	Non significant
SARS-CoV-2	920	935	IANQFNSAIGKIQDSL	15	WT_3hrincubation - WT_Noincubation	1	-0.0236122	0.0358781	-0.156996	0.096937	-0.333644	0.193874	-0.0222429	0.0129249	Not corrected	0.107191	0	Non significant
SARS-CoV-2	925	935	NSAIGKIQDSL	10	WT_3hrincubation - WT_Noincubation	1	0.001462	0.0333378	-0.201452	0.093718	-0.224775	0.187436	-0.0224775	0.0187436	Not corrected	0.202457	0	Non significant
SARS-CoV-2	928	935	IGKIQDSL	7	WT_3hrincubation - WT_Noincubation	1	0.0219265	0.0201764	-0.211087	0.0414779	-0.344718	0.0829558	-0.0492454	0.0118508	Not corrected	0.0176219	0	Non significant
SARS-CoV-2	928	942	IGKIQDSLSSTASAL	14	WT_3hrincubation - WT_Noincubation	1	0.0008605	0.0238773	-0.125646	0.0401461	-0.204422	0.0802921	-0.0146016	0.00573515	Not corrected	0.0750364	0	Non significant
SARS-CoV-2	943	958	GKLQDVVNQNAQALNT	15	WT_3hrincubation - WT_Noincubation	1	-0.00413067	0.0253767	-0.753365	0.146829	-1.41097	0.293657	-0.094065	0.0195772	Not corrected	0.0132808	0	Non significant
SARS-CoV-2	959	967	LVKQLSSNF	8	WT_3hrincubation - WT_Noincubation	1	0.0127212	0.0226255	-0.458529	0.0853004	-0.740597	0.170601	-0.0925746	0.0213251	Not corrected	0.0133479	0	Non significant
SARS-CoV-2	968	974	GAISSVL	6	WT_3hrincubation - WT_Noincubation	1	0.0008055	0.0183423	-0.701076	0.12194	-0.547226	0.12194	-0.0912043	0.0203234	Not corrected	0.019953	0	Non significant
SARS-CoV-2	979	987	SRLDPPEAE	6	WT_3hrincubation - WT_Noincubation	1	0.121675	0.0420648	-0.381467	0.0650719	-0.563736	0.130144	-0.093956	0.0216906	Not corrected	0.0102496	0	Non significant
SARS-CoV-2	988	993	VQIDRL	5	WT_3hrincubation - WT_Noincubation	1	0.0284275	0.0209956	-0.852907	0.176762	-0.76286	0.176762	-0.152572	0.0353523	Not corrected	0.0138129	0	Non significant
SARS-CoV-2	990	998	IDRLITGRL	8	WT_3hrincubation - WT_Noincubation	1	0.0342378	0.0232889	-0.273172	0.107714	-0.498355	0.215429	-0.0622943	0.0269286	Not corrected	0.056636	0	Non significant
SARS-CoV-2	994	998	ITGRL	4	WT_3hrincubation - WT_Noincubation	1	0.120329	0.0419338	-0.419012	0.0538739	-0.30921	0.0538739	-0.0773026	0.0134685	Not corrected	0.0116675	0	Non significant
SARS-CoV-2	1004	1009	YVTQQL	5	WT_3hrincubation - WT_Noincubation	1	0.0149502	0.0196203	0.0839598	0.0216371	0.156587	0.0216371	0.0313173	0.00432743	Not corrected	0.00694192	0	Non significant
SARS-CoV-2	1013	1021	AEIRASANL	8	WT_3hrincubation - WT_Noincubation	1	0.0251198	0.0198881	0.0770867	0.0439454	0.25615	0.0878909	0.0320188	0.0109864	Not corrected	0.0281193	0	Non significant
SARS-CoV-2	1015	1021	IRASANL	6	WT_3hrincubation - WT_Noincubation	1	0.048378	0.0120897	0.003523	0.0361879	0.080696	0.0361879	0.0134493	0.00603131	Not corrected	0.0500776	0	Non significant
SARS-CoV-2	1047	1060	MSFPQSAPHGVVFL	11	WT_3hrincubation - WT_Noincubation	1	-0.008947	0.0372066	0.00231117	0.0181916	0.157888	0.0363833	0.0143534	0.00330757	Not corrected	0.0240119	0	Non significant
SARS-CoV-2	1100	1114	FVTQRNFYEPQIITT	13	WT_3hrincubation - WT_Noincubation	1	0.0009945	0.0285836	-0.0736097	0.0396269	-0.0938323	0.0792539	-0.00721787	0.00609645	Not corrected	0.196338	0	Non significant
SARS-CoV-2	1106	1114	FYEPQIITT	7	WT_3hrincubation - WT_Noincubation	1	-0.0129518	0.0258735	-0.083978	0.0507032	-0.0775319	0.0507032	-0.011076	0.00724332	Not corrected	0.141366	0	Non significant
SARS-CoV-2	1106	1117	FYEPQIITTDNT	10	WT_3hrincubation - WT_Noincubation	1	-0.0164885	0.0219635	-0.0721232	0.0703512	-0.176372	0.140702	-0.0176372	0.0140702	Not corrected	0.170542	0	Non significant
SARS-CoV-2	1145	1149	FKEEL	4	WT_3hrincubation - WT_Noincubation	1	0.0367298	0.0231928	0.0168568	0.0788155	0.182575	0.0788155	0.0456437	0.0197039	Not corrected	0.050781	0	Non significant
SARS-CoV-2	1198	1205	QELGKYEQ	7	WT_3hrincubation - WT_Noincubation	1	0.0326545	0.0429653	-0.211078	0.106364	-0.286952	0.212729	-0.0409931	0.0303899	Not corrected	0.210536	0	Non significant
SARS-CoV-2	1198	1206	QELGKYEQY	8	WT_3hrincubation - WT_Noincubation	1	0.0229813	0.0319267	-0.1417	0.065483	-0.0841481	0.130966	-0.0105185	0.0163708	Not corrected	0.424055	0	Non significant
SARS-CoV-2	1221	1225	GSGYI	4	WT_3hrincubation - WT_Noincubation	1	0.0218305	0.0200959	-0.489893	0.120979	-0.410126	0.120979	-0.102531	0.0302447	Not corrected	0.0311236	0	Non significant
SARS-CoV-2	1235	1242	YVRKDGEW	7	WT_3hrincubation - WT_Noincubation	1	0.0434955	0.0357138	-0.0459852	0.0388112	-0.0989517	0.0776224	-0.014136	0.0110889	Not corrected	0.179835	0	Non significant
SARS-CoV-2	1243	1247	VLLST	4	WT_3hrincubation - WT_Noincubation	1	0.0215663	0.0111931	-0.386404	0.122535	-0.417069	0.122535	-0.104267	0.0306337	Not corrected	0.0278755	0	Non significant
SARS-CoV-2	1243	1248	VLLSTF	5	WT_3hrincubation - WT_Noincubation	1	-0.00799533	0.0242441	-0.454933	0.116607	-0.485062	0.116607	-0.0970123	0.0233213	Not corrected	0.0228116	0	Non significant
SARS-CoV-2	32	48	FTRGVYYPDKVFRSSVL	15	WT_3hrincubation - WT_Noincubation	1	0.0092145	0.0320113	-0.263389	0.0411071	-0.636609	0.123321	-0.0424406	0.00822141	Not corrected	0.00530242	0	Protected
SARS-CoV-2	180	191	EGKQGNFKNLRE	11	WT_3hrincubation - WT_Noincubation	1	0.0364195	0.0186149	-0.400095	0.0647989	-0.727084	0.129598	-0.0660986	0.0117816	Not corrected	0.00840768	0	Protected
SARS-CoV-2	388	392	NDLCF	4	WT_3hrincubation - WT_Noincubation	1	-0.01112	0.0337807	-0.346223	0.0606607	-0.317752	0.0606607	-0.0794381	0.0151652	Not corrected	0.00524489	0	Protected
SARS-CoV-2	442	452	DSKVGGNYNYL	10	WT_3hrincubation - WT_Noincubation	1	0.00937683	0.030798	-0.305684	0.0397296	-0.795072	0.0794591	-0.0795072	0.00794591	Not corrected	0.00123073	0	Protected
SARS-CoV-2	516	533	ELLHAPATVCGPKKSTNL	15	WT_3hrincubation - WT_Noincubation	1	0.0215965	0.0186533	-0.477542	0.0616097	-1.44116	0.184829	-0.0960776	0.0123219	Not corrected	0.00664315	0	Protected
SARS-CoV-2	553	568	TESNKKFLPFQQFGRD	14	WT_3hrincubation - WT_Noincubation	1	0.022225	0.0345108	-0.794317	0.1187	-1.44414	0.2374	-0.103153	0.0169571	Not corrected	0.00786054	0	Protected
SARS-CoV-2	569	582	IADTTDAVRDPQTL	12	WT_3hrincubation - WT_Noincubation	1	0.0157165	0.0192061	-0.247693	0.020041	-0.452452	0.040082	-0.0377043	0.00334017	Not corrected	0.00321049	0	Protected
SARS-CoV-2	692	696	YTMSL	4	WT_3hrincubation - WT_Noincubation	1	-0.00101617	0.0291569	-0.532314	0.062294	-0.426452	0.062294	-0.106613	0.0155735	Not corrected	0.00719838	0	Protected
SARS-CoV-2	959	974	LVKQLSSNFGAISSVL	15	WT_3hrincubation - WT_Noincubation	1	-0.0290082	0.0326408	-1.30711	0.100311	-2.5441	0.200622	-0.169607	0.0133748	Not corrected	0.000509426	0	Protected
SARS-CoV-2	977	987	ILSRLDPPEAE	8	WT_3hrincubation - WT_Noincubation	1	0.0252642	0.0160153	-0.671177	0.0919419	-1.34818	0.183884	-0.168522	0.0229855	Not corrected	0.00190345	0	Protected
SARS-CoV-2	979	989	SRLDPPEAEVQ	8	WT_3hrincubation - WT_Noincubation	1	0.019079	0.0222017	-0.583635	0.102118	-1.03655	0.204236	-0.129569	0.0255295	Not corrected	0.00892538	0	Protected
SARS-CoV-2	988	998	VQIDRLITGRL	10	WT_3hrincubation - WT_Noincubation	1	0.00691067	0.0278726	-0.631054	0.0698428	-1.74592	0.209528	-0.174592	0.0209528	Not corrected	0.00209046	0	Protected
SARS-CoV-2	32	42	FTRGVYYPDKV	9	WT_3hrincubation - WT_Noincubation	2	0.00738267	0.0230354	-0.108753	0.0320231	-0.155363	0.0960692	-0.0172625	0.0106744	Not corrected	0.0918896	0	Non significant
SARS-CoV-2	49	54	HSTQDL	5	WT_3hrincubation - WT_Noincubation	2	0.229897	0.0117553	0.0155922	0.0611607	0.083224	0.0611607	0.0166448	0.0122321	Not corrected	0.16951	0	Non significant
SARS-CoV-2	49	55	HSTQDLF	6	WT_3hrincubation - WT_Noincubation	2	0.0708133	0.0662263	0.0174023	0.0302654	0.0163052	0.0302654	0.00271753	0.00504423	Not corrected	0.488713	0	Non significant
SARS-CoV-2	92	103	FASTEKSNIIRG	11	WT_3hrincubation - WT_Noincubation	2	0.0587057	0.0267629	-0.17714	0.0311762	-0.160735	0.0623523	-0.0146123	0.00566839	Not corrected	0.0360544	0	Non significant
SARS-CoV-2	92	106	FASTEKSNIIRGWIF	14	WT_3hrincubation - WT_Noincubation	2	-0.007706	0.0548653	-0.00478967	0.0413969	0.10532	0.124191	0.00752288	0.00887076	Not corrected	0.30863	0	Non significant
SARS-CoV-2	92	110	FASTEKSNIIRGWIFGTTL	18	WT_3hrincubation - WT_Noincubation	2	-0.0246523	0.0544748	-0.0369353	0.0371464	0.0155401	0.111439	0.000863338	0.00619107	Not corrected	0.845226	0	Non significant
SARS-CoV-2	111	117	DSKTQSL	6	WT_3hrincubation - WT_Noincubation	2	0.249248	0.0126451	-0.0724938	0.0181963	-0.0106062	0.0181963	-0.00176769	0.00303271	Not corrected	0.506234	0	Non significant
SARS-CoV-2	177	191	MDLEGKQGNFKNLRE	14	WT_3hrincubation - WT_Noincubation	2	0.0112123	0.0215119	-0.176391	0.032157	-0.226299	0.0964709	-0.0161642	0.00689078	Not corrected	0.0260714	0	Non significant
SARS-CoV-2	180	191	EGKQGNFKNLRE	11	WT_3hrincubation - WT_Noincubation	2	0.0695123	0.0268859	-0.246333	0.0489062	-0.419559	0.0978123	-0.0381417	0.00889203	Not corrected	0.0184566	0	Non significant
SARS-CoV-2	192	199	FVFKNIDG	7	WT_3hrincubation - WT_Noincubation	2	0.0473727	0.0847434	-0.0977768	0.0230701	-0.170814	0.0461403	-0.024402	0.00659147	Not corrected	0.0318985	0	Non significant
SARS-CoV-2	192	201	FVFKNIDGYF	9	WT_3hrincubation - WT_Noincubation	2	-0.014413	0.0535389	-0.087194	0.0125477	-0.00740408	0.0250955	-0.000822675	0.00278839	Not corrected	0.684896	0	Non significant
SARS-CoV-2	195	201	KNIDGYF	6	WT_3hrincubation - WT_Noincubation	2	0.0314133	0.0480426	-0.104027	0.0738191	-0.118882	0.0738191	-0.0198137	0.0123032	Not corrected	0.0823972	0	Non significant
SARS-CoV-2	200	212	YFKIYSKHTPINL	11	WT_3hrincubation - WT_Noincubation	2	-0.0221615	0.0305068	-0.0594715	0.0475279	-0.104785	0.0950559	-0.0095259	0.00864144	Not corrected	0.226932	0	Non significant
SARS-CoV-2	201	212	FKIYSKHTPINL	10	WT_3hrincubation - WT_Noincubation	2	-0.0156037	0.0292626	-0.0351863	0.0690526	0.0493551	0.207158	0.00493551	0.0207158	Not corrected	0.748568	0	Non significant
SARS-CoV-2	202	212	KIYSKHTPINL	9	WT_3hrincubation - WT_Noincubation	2	0.0117727	0.0163578	-0.117188	0.0131572	-0.14111	0.0394715	-0.0156789	0.00438572	Not corrected	0.00658397	0	Non significant
SARS-CoV-2	213	220	VRDLPQGF	6	WT_3hrincubation - WT_Noincubation	2	0.014508	0.0301602	-0.0899333	0.030073	-0.0818764	0.060146	-0.0136461	0.0100243	Not corrected	0.14393	0	Non significant
SARS-CoV-2	221	228	SALEPLVD	6	WT_3hrincubation - WT_Noincubation	2	-0.00750867	0.0408181	0.00654467	0.0700545	0.00219601	0.0700545	0.000366002	0.0116757	Not corrected	0.965305	0	Non significant
SARS-CoV-2	265	276	YYVGYLQPRTFL	10	WT_3hrincubation - WT_Noincubation	2	-0.01332	0.0528499	-0.0462977	0.0219729	0.113053	0.0439457	0.0113053	0.00439457	Not corrected	0.0451292	0	Non significant
SARS-CoV-2	266	276	YVGYLQPRTFL	9	WT_3hrincubation - WT_Noincubation	2	-0.010414	0.0499643	-0.0309407	0.0214728	0.148935	0.0429457	0.0165484	0.00477174	Not corrected	0.0311334	0	Non significant
SARS-CoV-2	267	276	VGYLQPRTFL	8	WT_3hrincubation - WT_Noincubation	2	0.0184775	0.0306961	0.026533	0.0198966	0.099379	0.0397931	0.0124224	0.00497414	Not corrected	0.0588311	0	Non significant
SARS-CoV-2	269	276	YLQPRTFL	6	WT_3hrincubation - WT_Noincubation	2	0.0150637	0.0401309	0.0267113	0.0249376	0.103114	0.0498752	0.0171856	0.00831253	Not corrected	0.0881529	0	Non significant
SARS-CoV-2	306	313	FTVEKGIY	7	WT_3hrincubation - WT_Noincubation	2	0.0318457	0.0414073	-0.132725	0.0301019	-0.0942584	0.0602038	-0.0134655	0.00860055	Not corrected	0.0911735	0	Non significant
SARS-CoV-2	306	317	FTVEKGIYQTSN	11	WT_3hrincubation - WT_Noincubation	2	0.00646133	0.0227723	-0.112096	0.0367567	-0.162164	0.0735133	-0.0147422	0.00668303	Not corrected	0.0313063	0	Non significant
SARS-CoV-2	306	318	FTVEKGIYQTSNF	12	WT_3hrincubation - WT_Noincubation	2	0.00255133	0.0437445	-0.0963983	0.0159307	0.0172614	0.0318615	0.00143845	0.00265512	Not corrected	0.476508	0	Non significant
SARS-CoV-2	314	318	QTSNF	4	WT_3hrincubation - WT_Noincubation	2	0.0605877	0.00537182	0.0283843	0.101806	0.0593935	0.101806	0.0148484	0.0254516	Not corrected	0.467918	0	Non significant
SARS-CoV-2	369	374	YNSASF	5	WT_3hrincubation - WT_Noincubation	2	0.020642	0.018107	-0.271006	0.049606	-0.188008	0.049606	-0.0376016	0.00992121	Not corrected	0.0237343	0	Non significant
SARS-CoV-2	388	392	NDLCF	4	WT_3hrincubation - WT_Noincubation	2	-0.014713	0.0385823	-0.390497	0.0847606	-0.362026	0.0847606	-0.0905065	0.0211901	Not corrected	0.0182255	0	Non significant
SARS-CoV-2	400	406	FVIRGDE	6	WT_3hrincubation - WT_Noincubation	2	0.0306097	0.0117676	-0.0593647	0.00804651	-0.0549998	0.016093	-0.00916664	0.00268217	Not corrected	0.0356618	0	Non significant
SARS-CoV-2	400	422	FVIRGDEVRQIAPGQTGKIADYN	21	WT_3hrincubation - WT_Noincubation	2	-0.00154483	0.0171816	-0.0251768	0.0128899	0.00459954	0.0515597	0.000219026	0.00245522	Not corrected	0.913669	0	Non significant
SARS-CoV-2	401	420	VIRGDEVRQIAPGQTGKIAD	18	WT_3hrincubation - WT_Noincubation	2	0.0148567	0.0134459	-0.171773	0.0515961	-0.49572	0.154788	-0.02754	0.00859935	Not corrected	0.0226909	0	Non significant
SARS-CoV-2	407	421	VRQIAPGQTGKIADY	13	WT_3hrincubation - WT_Noincubation	2	0.00317367	0.0168603	-0.074357	0.030966	-0.0793877	0.061932	-0.00610675	0.004764	Not corrected	0.168928	0	Non significant
SARS-CoV-2	407	422	VRQIAPGQTGKIADYN	14	WT_3hrincubation - WT_Noincubation	2	0.0176133	0.0103301	-0.131343	0.0237436	-0.163671	0.0474872	-0.0116908	0.00339194	Not corrected	0.0999564	0	Non significant
SARS-CoV-2	421	431	YNYKLPDDFTG	9	WT_3hrincubation - WT_Noincubation	2	0.0034675	0.0538764	-0.041652	0.0526701	-0.0261051	0.10534	-0.00290057	0.0117045	Not corrected	0.822566	0	Non significant
SARS-CoV-2	422	429	NYKLPDDF	6	WT_3hrincubation - WT_Noincubation	2	0.0112293	0.0390027	0.0725823	0.0331341	0.174745	0.0662683	0.0291242	0.0110447	Not corrected	0.0369385	0	Non significant
SARS-CoV-2	423	429	YKLPDDF	5	WT_3hrincubation - WT_Noincubation	2	0.00289933	0.0385958	-0.0328667	0.0207249	0.0171016	0.0414498	0.00342033	0.00828997	Not corrected	0.587854	0	Non significant
SARS-CoV-2	423	431	YKLPDDFTG	7	WT_3hrincubation - WT_Noincubation	2	0.0810118	0.103346	-0.412425	0.0209525	-0.725679	0.041905	-0.103668	0.00598643	Not corrected	0.0255673	0	Non significant
SARS-CoV-2	442	452	DSKVGGNYNYL	10	WT_3hrincubation - WT_Noincubation	2	0.0191973	0.0586142	-0.206078	0.0226626	-0.595861	0.0453252	-0.0595861	0.00453252	Not corrected	0.0129563	0	Non significant
SARS-CoV-2	453	467	YRLFRKSNLKPFERD	13	WT_3hrincubation - WT_Noincubation	2	0.00313467	0.0201907	0.0445922	0.0163131	0.189211	0.0489394	0.0145547	0.00376457	Not corrected	0.0119364	0	Non significant
SARS-CoV-2	456	467	FRKSNLKPFERD	10	WT_3hrincubation - WT_Noincubation	2	0.0499973	0.0127729	0.000723333	0.0320212	0.122806	0.0640425	0.0122806	0.00640425	Not corrected	0.094067	0	Non significant
SARS-CoV-2	456	470	FRKSNLKPFERDIST	13	WT_3hrincubation - WT_Noincubation	2	0.0298707	0.0302058	-0.0255287	0.0347152	0.038681	0.138861	0.00297546	0.0106816	Not corrected	0.706505	0	Non significant
SARS-CoV-2	456	471	FRKSNLKPFERDISTE	14	WT_3hrincubation - WT_Noincubation	2	-0.0389067	0.0696472	0.0344827	0.0244455	0.265915	0.0977821	0.0189939	0.00698443	Not corrected	0.0264671	0	Non significant
SARS-CoV-2	495	510	YGFQPTNGVGYQPYRV	13	WT_3hrincubation - WT_Noincubation	2	-0.012633	0.0409547	0.142669	0.105913	0.373815	0.211827	0.028755	0.0162944	Not corrected	0.0613821	0	Non significant
SARS-CoV-2	511	515	VVLSF	4	WT_3hrincubation - WT_Noincubation	2	-0.0294363	0.0398774	-0.161928	0.0168702	-0.0199568	0.0168702	-0.00498919	0.00421755	Not corrected	0.155291	0	Non significant
SARS-CoV-2	544	552	NGLTGTGVL	8	WT_3hrincubation - WT_Noincubation	2	-0.0128977	0.0377858	0.0715883	0.069712	-0.00692651	0.069712	-0.000865813	0.00871399	Not corrected	0.894776	0	Non significant
SARS-CoV-2	546	552	LTGTGVL	6	WT_3hrincubation - WT_Noincubation	2	-0.008331	0.0186064	-0.0462243	0.051205	-0.0023667	0.051205	-0.00039445	0.00853416	Not corrected	0.949759	0	Non significant
SARS-CoV-2	553	565	TESNKKFLPFQQF	11	WT_3hrincubation - WT_Noincubation	2	-0.001491	0.0465186	-0.2213	0.0681988	-0.55434	0.204596	-0.0503945	0.0185997	Not corrected	0.0260637	0	Non significant
SARS-CoV-2	553	568	TESNKKFLPFQQFGRD	14	WT_3hrincubation - WT_Noincubation	2	0.0795873	0.122687	-0.566271	0.193645	-0.988049	0.38729	-0.0705749	0.0276636	Not corrected	0.0558967	0	Non significant
SARS-CoV-2	575	582	AVRDPQTL	6	WT_3hrincubation - WT_Noincubation	2	0.0602333	0.00879492	-0.0671277	0.0596116	-0.0401906	0.0596116	-0.00669843	0.00993526	Not corrected	0.369095	0	Non significant
SARS-CoV-2	575	583	AVRDPQTLE	7	WT_3hrincubation - WT_Noincubation	2	0.0749797	0.0371252	-0.0746503	0.0391179	-0.0547569	0.0782358	-0.00782242	0.0111765	Not corrected	0.39037	0	Non significant
SARS-CoV-2	576	582	VRDPQTL	5	WT_3hrincubation - WT_Noincubation	2	0.0856907	0.0368195	-0.0826	0.0390744	-0.107671	0.0390744	-0.0215342	0.00781489	Not corrected	0.017031	0	Non significant
SARS-CoV-2	576	583	VRDPQTLE	6	WT_3hrincubation - WT_Noincubation	2	0.0977377	0.0529217	0.027949	0.0631353	0.0832462	0.126271	0.0138744	0.0210451	Not corrected	0.391554	0	Non significant
SARS-CoV-2	586	592	DITPCSF	5	WT_3hrincubation - WT_Noincubation	2	-0.0273848	0.0340537	-0.181705	0.0905907	-0.184473	0.0905907	-0.0368946	0.0181181	Not corrected	0.0773153	0	Non significant
SARS-CoV-2	627	633	DQLTPTW	5	WT_3hrincubation - WT_Noincubation	2	-0.0289863	0.0372681	-0.0468943	0.108822	-0.0163541	0.108822	-0.00327081	0.0217643	Not corrected	0.840819	0	Non significant
SARS-CoV-2	685	691	ASQSIIA	6	WT_3hrincubation - WT_Noincubation	2	0.0137043	0.00674975	-0.378025	0.104382	-0.369707	0.104382	-0.0616178	0.017397	Not corrected	0.0276495	0	Non significant
SARS-CoV-2	692	696	YTMSL	4	WT_3hrincubation - WT_Noincubation	2	-0.00275867	0.0333776	-0.496207	0.0818741	-0.390344	0.0818741	-0.097586	0.0204685	Not corrected	0.0149148	0	Non significant
SARS-CoV-2	716	720	TISVT	4	WT_3hrincubation - WT_Noincubation	2	0.0525013	0.0111466	-0.0706107	0.0153572	0.00175459	0.0153572	0.000438649	0.00383931	Not corrected	0.877299	0	Non significant
SARS-CoV-2	719	724	VTTEIL	5	WT_3hrincubation - WT_Noincubation	2	0.005103	0.0416267	-0.097858	0.0279019	-0.101995	0.0279019	-0.020399	0.00558039	Not corrected	0.0127685	0	Non significant
SARS-CoV-2	722	728	EILPVSM	5	WT_3hrincubation - WT_Noincubation	2	-0.0334717	0.0360079	0.083566	0.0179864	0.0698708	0.0179864	0.0139742	0.00359728	Not corrected	0.00820218	0	Non significant
SARS-CoV-2	750	756	LLQYGSF	6	WT_3hrincubation - WT_Noincubation	2	-0.0226023	0.0412021	-0.326113	0.0749819	-0.242464	0.0749819	-0.0404107	0.012497	Not corrected	0.0184906	0	Non significant
SARS-CoV-2	751	756	LQYGSF	5	WT_3hrincubation - WT_Noincubation	2	0.000102333	0.0374506	-0.140528	0.0834324	-0.145025	0.0834324	-0.0290049	0.0166865	Not corrected	0.101712	0	Non significant
SARS-CoV-2	761	768	NRALTGIA	7	WT_3hrincubation - WT_Noincubation	2	0.0848343	0.00871711	0.127312	0.0553282	-0.21478	0.0553282	-0.0306829	0.00790404	Not corrected	0.0237918	0	Non significant
SARS-CoV-2	767	779	IAVEQDKNTQEVF	12	WT_3hrincubation - WT_Noincubation	2	0.006044	0.0254489	-0.043467	0.0106297	0.104681	0.0212593	0.0087234	0.00177161	Not corrected	0.00623017	0	Non significant
SARS-CoV-2	769	779	VEQDKNTQEVF	10	WT_3hrincubation - WT_Noincubation	2	0.031678	0.0181489	-0.053054	0.0340714	0.0482718	0.0681428	0.00482718	0.00681428	Not corrected	0.392614	0	Non significant
SARS-CoV-2	780	793	AQVKQIYKTPPIKD	11	WT_3hrincubation - WT_Noincubation	2	0.0191467	0.00742088	-0.416144	0.112397	-0.846935	0.224794	-0.0769941	0.0204359	Not corrected	0.0225912	0	Non significant
SARS-CoV-2	815	819	IEDLL	4	WT_3hrincubation - WT_Noincubation	2	-0.0174133	0.0368623	-0.136017	0.0147236	0.00166658	0.0147236	0.000416646	0.00368089	Not corrected	0.879	0	Non significant
SARS-CoV-2	818	825	LLFNKVTL	7	WT_3hrincubation - WT_Noincubation	2	-0.0172023	0.044625	-0.0276993	0.0307604	0.0694233	0.0615207	0.00991761	0.00878867	Not corrected	0.180352	0	Non significant
SARS-CoV-2	820	825	FNKVTL	5	WT_3hrincubation - WT_Noincubation	2	0.009072	0.0209812	-0.0809623	0.0127011	-0.0139327	0.0254022	-0.00278655	0.00508045	Not corrected	0.468265	0	Non significant
SARS-CoV-2	820	830	FNKVTLADAGF	10	WT_3hrincubation - WT_Noincubation	2	-0.0101873	0.0429616	0.0396197	0.0549809	0.224586	0.109962	0.0224586	0.0109962	Not corrected	0.03855	0	Non significant
SARS-CoV-2	826	830	ADAGF	4	WT_3hrincubation - WT_Noincubation	2	0.0341177	0.00783993	-0.0473197	0.0455382	-0.0553427	0.0455382	-0.0138357	0.0113846	Not corrected	0.145916	0	Non significant
SARS-CoV-2	856	862	TVLPPLL	4	WT_3hrincubation - WT_Noincubation	2	-0.0517527	0.0436711	-0.33182	0.0728527	-0.25991	0.0728527	-0.0649776	0.0182132	Not corrected	0.0234301	0	Non significant
SARS-CoV-2	870	874	YTSAL	4	WT_3hrincubation - WT_Noincubation	2	0.0273843	0.00871587	-0.320684	0.050244	-0.262167	0.050244	-0.0655418	0.012561	Not corrected	0.0148356	0	Non significant
SARS-CoV-2	875	882	LAGTITSG	7	WT_3hrincubation - WT_Noincubation	2	0.0503813	0.00763558	-1.25966	0.255862	-1.22073	0.255862	-0.17439	0.0365517	Not corrected	0.012612	0	Non significant
SARS-CoV-2	899	903	MAYRF	4	WT_3hrincubation - WT_Noincubation	2	0.0587163	0.058257	-0.257055	0.0472314	-0.186192	0.0472314	-0.0465481	0.0118079	Not corrected	0.00804139	0	Non significant
SARS-CoV-2	901	913	YRFNGIGVTQNVL	12	WT_3hrincubation - WT_Noincubation	2	-0.0117758	0.0558899	-0.536995	0.0586492	-1.04218	0.117298	-0.0868487	0.00977487	Not corrected	0.0224172	0	Non significant
SARS-CoV-2	904	913	NGIGVTQNVL	9	WT_3hrincubation - WT_Noincubation	2	-0.013592	0.0423296	-0.725409	0.14277	-0.721347	0.14277	-0.0801497	0.0158633	Not corrected	0.0107415	0	Non significant
SARS-CoV-2	914	919	YENQKL	5	WT_3hrincubation - WT_Noincubation	2	0.14431	0.0534913	-0.322764	0.0623163	-0.232537	0.0623163	-0.0465074	0.0124633	Not corrected	0.0167455	0	Non significant
SARS-CoV-2	920	924	IANQF	4	WT_3hrincubation - WT_Noincubation	2	0.020798	0.0138133	-0.147072	0.0257296	-0.0651148	0.0257296	-0.0162787	0.00643241	Not corrected	0.0382723	0	Non significant
SARS-CoV-2	920	935	IANQFNSAIGKIQDSL	15	WT_3hrincubation - WT_Noincubation	2	-0.0511117	0.0501846	-0.161348	0.0497731	-0.342348	0.0995463	-0.0228232	0.00663642	Not corrected	0.023191	0	Non significant
SARS-CoV-2	925	935	NSAIGKIQDSL	10	WT_3hrincubation - WT_Noincubation	2	0.0010755	0.0205157	-0.127422	0.0604404	-0.0767155	0.120881	-0.00767155	0.0120881	Not corrected	0.554844	0	Non significant
SARS-CoV-2	928	942	IGKIQDSLSSTASAL	14	WT_3hrincubation - WT_Noincubation	2	0.028043	0.0859286	0.0157673	0.131904	0.078404	0.263807	0.00560028	0.0188434	Not corrected	0.690135	0	Non significant
SARS-CoV-2	936	942	SSTASAL	6	WT_3hrincubation - WT_Noincubation	2	0.0650493	0.00913785	-0.345661	0.101432	-0.332732	0.101432	-0.0554553	0.0169054	Not corrected	0.0201144	0	Non significant
SARS-CoV-2	959	967	LVKQLSSNF	8	WT_3hrincubation - WT_Noincubation	2	0.001563	0.0207327	-0.403338	0.0772846	-0.630217	0.154569	-0.0787771	0.0193211	Not corrected	0.0150156	0	Non significant
SARS-CoV-2	968	974	GAISSVL	6	WT_3hrincubation - WT_Noincubation	2	-0.00916667	0.0372208	-0.540313	0.12155	-0.386463	0.12155	-0.0644104	0.0202583	Not corrected	0.0203777	0	Non significant
SARS-CoV-2	977	987	ILSRLDPPEAE	8	WT_3hrincubation - WT_Noincubation	2	0.011988	0.0110452	-0.50418	0.101774	-1.01418	0.203548	-0.126773	0.0254435	Not corrected	0.0413237	0	Non significant
SARS-CoV-2	979	987	SRLDPPEAE	6	WT_3hrincubation - WT_Noincubation	2	0.047527	0.0124783	-0.321544	0.0610119	-0.44389	0.122024	-0.0739817	0.0203373	Not corrected	0.0312179	0	Non significant
SARS-CoV-2	988	993	VQIDRL	5	WT_3hrincubation - WT_Noincubation	2	0.0153057	0.0212815	-0.825189	0.155367	-0.735142	0.155367	-0.147028	0.0310734	Not corrected	0.0119113	0	Non significant
SARS-CoV-2	999	1003	QSLQT	4	WT_3hrincubation - WT_Noincubation	2	0.219886	0.0226059	-0.110801	0.014937	-0.0439307	0.014937	-0.0109827	0.00373426	Not corrected	0.0345761	0	Non significant
SARS-CoV-2	1004	1009	YVTQQL	5	WT_3hrincubation - WT_Noincubation	2	0.00889317	0.0183713	0.0671587	0.00850784	0.139785	0.00850784	0.0279571	0.00170157	Not corrected	0.00116984	0	Non significant
SARS-CoV-2	1013	1021	AEIRASANL	8	WT_3hrincubation - WT_Noincubation	2	0.027103	0.0119825	-0.046311	0.0564903	0.00935495	0.112981	0.00116937	0.0141226	Not corrected	0.911356	0	Non significant
SARS-CoV-2	1015	1021	IRASANL	6	WT_3hrincubation - WT_Noincubation	2	0.0631453	0.0218512	-0.117081	0.057284	-0.0399076	0.057284	-0.00665127	0.00954733	Not corrected	0.355016	0	Non significant
SARS-CoV-2	1047	1059	MSFPQSAPHGVVF	10	WT_3hrincubation - WT_Noincubation	2	0.00470483	0.045839	0.0384307	0.0176218	0.236609	0.0352437	0.0236609	0.00352437	Not corrected	0.0658655	0	Non significant
SARS-CoV-2	1047	1060	MSFPQSAPHGVVFL	11	WT_3hrincubation - WT_Noincubation	2	-0.020946	0.0500244	0.0102723	0.0262315	0.17381	0.0524631	0.0158009	0.00476937	Not corrected	0.017991	0	Non significant
SARS-CoV-2	1100	1114	FVTQRNFYEPQIITT	13	WT_3hrincubation - WT_Noincubation	2	-0.01117	0.0401963	-0.137268	0.0506391	-0.22115	0.101278	-0.0170115	0.00779063	Not corrected	0.0727586	0	Non significant
SARS-CoV-2	1106	1114	FYEPQIITT	7	WT_3hrincubation - WT_Noincubation	2	-0.0267153	0.0376833	-0.0429023	0.168921	-0.0364562	0.168921	-0.00520803	0.0241316	Not corrected	0.774651	0	Non significant
SARS-CoV-2	1106	1117	FYEPQIITTDNT	10	WT_3hrincubation - WT_Noincubation	2	-0.0292513	0.0383301	-0.0799417	0.0757193	-0.192009	0.151439	-0.0192009	0.0151439	Not corrected	0.156638	0	Non significant
SARS-CoV-2	1145	1149	FKEEL	4	WT_3hrincubation - WT_Noincubation	2	0.0284933	0.018511	0.0505023	0.0778434	0.21622	0.0778434	0.0540551	0.0194608	Not corrected	0.0141848	0	Non significant
SARS-CoV-2	1198	1205	QELGKYEQ	7	WT_3hrincubation - WT_Noincubation	2	0.0606063	0.00991647	-0.230035	0.103863	-0.324867	0.207725	-0.0464096	0.0296751	Not corrected	0.106556	0	Non significant
SARS-CoV-2	1198	1206	QELGKYEQY	8	WT_3hrincubation - WT_Noincubation	2	0.0270733	0.0184538	-0.107751	0.056802	-0.0162487	0.113604	-0.00203109	0.0142005	Not corrected	0.843337	0	Non significant
SARS-CoV-2	1221	1225	GSGYI	4	WT_3hrincubation - WT_Noincubation	2	0.0110793	0.017278	-0.472944	0.120331	-0.393177	0.120331	-0.0982942	0.0300828	Not corrected	0.0325495	0	Non significant
SARS-CoV-2	1235	1242	YVRKDGEW	7	WT_3hrincubation - WT_Noincubation	2	0.0745777	0.00750005	-0.0326785	0.0266561	-0.0723384	0.0533123	-0.0103341	0.00761604	Not corrected	0.335025	0	Non significant
SARS-CoV-2	1243	1247	VLLST	4	WT_3hrincubation - WT_Noincubation	2	0.00164667	0.0101846	-0.152936	0.0412503	-0.183601	0.0412503	-0.0459002	0.0103126	Not corrected	0.0200498	0	Non significant
SARS-CoV-2	94	103	STEKSNIIRG	9	WT_3hrincubation - WT_Noincubation	2	0.062325	0.0275529	-0.213582	0.0242312	-0.355117	0.0484625	-0.0394574	0.00538472	Not corrected	0.0032136	0	Protected
SARS-CoV-2	401	422	VIRGDEVRQIAPGQTGKIADYN	20	WT_3hrincubation - WT_Noincubation	2	-0.01904	0	-0.092295	0	-0.391261	0	-0.0195631	0	Not corrected	0	0	Protected
SARS-CoV-2	569	582	IADTTDAVRDPQTL	12	WT_3hrincubation - WT_Noincubation	2	0.000215	0.0187675	-0.263264	0.0511112	-0.483593	0.102222	-0.0402994	0.00851853	Not corrected	0.00510018	0	Protected
SARS-CoV-2	856	863	TVLPPLLT	5	WT_3hrincubation - WT_Noincubation	2	-0.0584377	0.0405471	-0.64414	0.106187	-0.657384	0.106187	-0.131477	0.0212374	Not corrected	0.0051803	0	Protected
SARS-CoV-2	867	874	IAQYTSAL	7	WT_3hrincubation - WT_Noincubation	2	-0.0151737	0.0231058	-0.549693	0.0653656	-0.52514	0.0653656	-0.07502	0.00933795	Not corrected	0.0024469	0	Protected
SARS-CoV-2	891	896	LQIPFA	4	WT_3hrincubation - WT_Noincubation	2	-0.0483603	0.0430173	-0.335076	0.0823563	-0.360785	0.0823563	-0.0901963	0.0205891	Not corrected	0.00828056	0	Protected
SARS-CoV-2	899	913	MAYRFNGIGVTQNVL	14	WT_3hrincubation - WT_Noincubation	2	-0.0265437	0.0469826	-0.52389	0.095198	-1.12527	0.190396	-0.0803761	0.0135997	Not corrected	0.00104608	0	Protected
SARS-CoV-2	900	910	AYRFNGIGVTQ	10	WT_3hrincubation - WT_Noincubation	2	0.032886	0	-0.259165	0	-0.471231	0	-0.0471231	0	Not corrected	0	0	Protected
SARS-CoV-2	900	913	AYRFNGIGVTQNVL	13	WT_3hrincubation - WT_Noincubation	2	-0.0149053	0.0426318	-0.604271	0.0738152	-1.08822	0.14763	-0.0837089	0.0113562	Not corrected	0.000984331	0	Protected
SARS-CoV-2	906	913	IGVTQNVL	7	WT_3hrincubation - WT_Noincubation	2	0.0109463	0.056991	-0.698536	0.0776662	-0.706216	0.0776662	-0.100888	0.0110952	Not corrected	0.000532034	0	Protected
SARS-CoV-2	928	935	IGKIQDSL	7	WT_3hrincubation - WT_Noincubation	2	0.007915	0.0209825	-0.220316	0.00991911	-0.363176	0.0198382	-0.0518823	0.00283403	Not corrected	8.51995e-05	0	Protected
SARS-CoV-2	943	958	GKLQDVVNQNAQALNT	15	WT_3hrincubation - WT_Noincubation	2	-0.015959	0.0248131	-0.596455	0.102416	-1.09715	0.204832	-0.0731436	0.0136555	Not corrected	0.00297022	0	Protected
SARS-CoV-2	959	974	LVKQLSSNFGAISSVL	15	WT_3hrincubation - WT_Noincubation	2	-0.049213	0.049259	-1.36745	0.110092	-2.66478	0.220184	-0.177652	0.0146789	Not corrected	0.00198454	0	Protected
SARS-CoV-2	960	967	VKQLSSNF	7	WT_3hrincubation - WT_Noincubation	2	0.021135	0.0205442	-0.471052	0.0315074	-0.944789	0.0630148	-0.13497	0.00900211	Not corrected	0.00012578	0	Protected
SARS-CoV-2	979	989	SRLDPPEAEVQ	8	WT_3hrincubation - WT_Noincubation	2	0.025063	0.00560709	-0.471885	0.0730139	-0.813048	0.146028	-0.101631	0.0182535	Not corrected	0.00275383	0	Protected
SARS-CoV-2	988	998	VQIDRLITGRL	10	WT_3hrincubation - WT_Noincubation	2	-0.008676	0.0423647	-0.748225	0.0913746	-2.09743	0.274124	-0.209743	0.0274124	Not corrected	0.000763014	0	Protected
SARS-CoV-2	990	998	IDRLITGRL	8	WT_3hrincubation - WT_Noincubation	2	0.00531367	0.0316036	-0.483154	0.0881583	-0.918319	0.176317	-0.11479	0.0220396	Not corrected	0.00998602	0	Protected
SARS-CoV-2	994	998	ITGRL	4	WT_3hrincubation - WT_Noincubation	2	0.109978	0.0508183	-0.552902	0.0460963	-0.443101	0.0460963	-0.110775	0.0115241	Not corrected	0.00198855	0	Protected
SARS-CoV-2	1243	1248	VLLSTF	5	WT_3hrincubation - WT_Noincubation	2	-0.030157	0.0400556	-0.338277	0.0496489	-0.368406	0.0496489	-0.0736811	0.00992979	Not corrected	0.00784982	0	Protected
SARS-CoV-2	32	42	FTRGVYYPDKV	9	WT_3hrincubation - WT_Noincubation	10	0.0123052	0.0166167	-0.116752	0.0138254	-0.17936	0.0414763	-0.0199289	0.00460847	Not corrected	0.00874527	0	Non significant
SARS-CoV-2	49	54	HSTQDL	5	WT_3hrincubation - WT_Noincubation	10	0.16592	0.09249	0.0808967	0.113091	0.148528	0.113091	0.0297057	0.0226182	Not corrected	0.134373	0	Non significant
SARS-CoV-2	49	55	HSTQDLF	6	WT_3hrincubation - WT_Noincubation	10	0.030289	0.0169147	0.0359323	0.034047	0.0348352	0.034047	0.00580586	0.0056745	Not corrected	0.253244	0	Non significant
SARS-CoV-2	92	103	FASTEKSNIIRG	11	WT_3hrincubation - WT_Noincubation	10	0.0613757	0.0487211	-0.163613	0.015958	-0.133681	0.0319159	-0.0121529	0.00290145	Not corrected	0.00352962	0	Non significant
SARS-CoV-2	92	106	FASTEKSNIIRGWIF	14	WT_3hrincubation - WT_Noincubation	10	-0.00803633	0.0439588	0.003735	0.0253441	0.130894	0.0760322	0.0093496	0.00543087	Not corrected	0.111267	0	Non significant
SARS-CoV-2	92	110	FASTEKSNIIRGWIFGTTL	18	WT_3hrincubation - WT_Noincubation	10	-0.028243	0.0384416	-0.0373203	0.02009	0.0143851	0.0602701	0.000799172	0.00334834	Not corrected	0.754439	0	Non significant
SARS-CoV-2	94	103	STEKSNIIRG	9	WT_3hrincubation - WT_Noincubation	10	0.062752	0.0472776	-0.17092	0.0418139	-0.269793	0.0836277	-0.029977	0.00929197	Not corrected	0.0102423	0	Non significant
SARS-CoV-2	111	117	DSKTQSL	6	WT_3hrincubation - WT_Noincubation	10	0.19079	0.124024	-0.0833897	0.0209862	-0.021502	0.0209862	-0.00358366	0.00349771	Not corrected	0.202749	0	Non significant
SARS-CoV-2	177	191	MDLEGKQGNFKNLRE	14	WT_3hrincubation - WT_Noincubation	10	0.0147177	0.0163034	-0.192854	0.0270938	-0.275689	0.0812813	-0.0196921	0.00580581	Not corrected	0.0220211	0	Non significant
SARS-CoV-2	192	199	FVFKNIDG	7	WT_3hrincubation - WT_Noincubation	10	0.0143233	0.0208699	-0.0850833	0.0431933	-0.145427	0.0863867	-0.0207753	0.012341	Not corrected	0.095341	0	Non significant
SARS-CoV-2	192	200	FVFKNIDGY	8	WT_3hrincubation - WT_Noincubation	10	0.00787617	0.027782	-0.081771	0.00866755	-0.0192543	0.0173351	-0.00240679	0.00216689	Not corrected	0.213746	0	Non significant
SARS-CoV-2	192	201	FVFKNIDGYF	9	WT_3hrincubation - WT_Noincubation	10	-0.015736	0.0417081	-0.0744853	0.0131603	0.0180133	0.0263207	0.00200147	0.00292452	Not corrected	0.378101	0	Non significant
SARS-CoV-2	195	201	KNIDGYF	6	WT_3hrincubation - WT_Noincubation	10	0.033648	0.0248227	0.02015	0.178683	0.00529418	0.178683	0.000882364	0.0297804	Not corrected	0.977776	0	Non significant
SARS-CoV-2	200	212	YFKIYSKHTPINL	11	WT_3hrincubation - WT_Noincubation	10	-0.00798067	0.0195989	-0.046333	0.0312946	-0.0785079	0.0625893	-0.00713708	0.00568993	Not corrected	0.18099	0	Non significant
SARS-CoV-2	201	212	FKIYSKHTPINL	10	WT_3hrincubation - WT_Noincubation	10	-0.0208435	0.00753021	0.00309767	0.0488631	0.164207	0.146589	0.0164207	0.0146589	Not corrected	0.42305	0	Non significant
SARS-CoV-2	202	212	KIYSKHTPINL	9	WT_3hrincubation - WT_Noincubation	10	0.00825467	0.0204117	-0.0955357	0.00662331	-0.0761543	0.0198699	-0.00846159	0.00220777	Not corrected	0.00608956	0	Non significant
SARS-CoV-2	213	220	VRDLPQGF	6	WT_3hrincubation - WT_Noincubation	10	0.013893	0.0168785	-0.0406547	0.0146161	0.0166809	0.0292322	0.00278015	0.00487203	Not corrected	0.460771	0	Non significant
SARS-CoV-2	221	228	SALEPLVD	6	WT_3hrincubation - WT_Noincubation	10	-0.009622	0.0227279	-0.0831523	0.0546079	-0.087501	0.0546079	-0.0145835	0.00910132	Not corrected	0.107296	0	Non significant
SARS-CoV-2	265	276	YYVGYLQPRTFL	10	WT_3hrincubation - WT_Noincubation	10	-0.0120073	0.0426469	-0.0875953	0.0313979	0.0304575	0.0627957	0.00304575	0.00627957	Not corrected	0.541922	0	Non significant
SARS-CoV-2	266	276	YVGYLQPRTFL	9	WT_3hrincubation - WT_Noincubation	10	-0.016832	0.0474693	-0.065684	0.0172606	0.0794487	0.0345211	0.00882763	0.00383568	Not corrected	0.0600468	0	Non significant
SARS-CoV-2	267	276	VGYLQPRTFL	8	WT_3hrincubation - WT_Noincubation	10	0.00265867	0.0426141	-0.0960343	0.0156883	-0.145756	0.0313766	-0.0182195	0.00392207	Not corrected	0.0112736	0	Non significant
SARS-CoV-2	269	276	YLQPRTFL	6	WT_3hrincubation - WT_Noincubation	10	0.0305363	0.0321781	-0.0229567	0.0103035	0.00377757	0.0206069	0.000629596	0.00343449	Not corrected	0.800671	0	Non significant
SARS-CoV-2	306	318	FTVEKGIYQTSNF	12	WT_3hrincubation - WT_Noincubation	10	0.0230313	0.046266	-0.253321	0.0626687	-0.296584	0.125337	-0.0247153	0.0104448	Not corrected	0.0494262	0	Non significant
SARS-CoV-2	314	318	QTSNF	4	WT_3hrincubation - WT_Noincubation	10	0.0666897	0.0227683	-0.105514	0.0184424	-0.0745045	0.0184424	-0.0186261	0.00461061	Not corrected	0.00377854	0	Non significant
SARS-CoV-2	369	374	YNSASF	5	WT_3hrincubation - WT_Noincubation	10	0.0281627	0.0113474	-0.189222	0.0397066	-0.106224	0.0397066	-0.0212447	0.00794132	Not corrected	0.0217788	0	Non significant
SARS-CoV-2	400	406	FVIRGDE	6	WT_3hrincubation - WT_Noincubation	10	0.0372942	0.011645	-0.0204907	0.0122529	0.0227482	0.0245059	0.00379136	0.00408431	Not corrected	0.457685	0	Non significant
SARS-CoV-2	407	421	VRQIAPGQTGKIADY	13	WT_3hrincubation - WT_Noincubation	10	-0.0023235	0.013125	-0.0768055	0.0487979	-0.0842847	0.0975958	-0.00648344	0.00750737	Not corrected	0.309333	0	Non significant
SARS-CoV-2	407	422	VRQIAPGQTGKIADYN	14	WT_3hrincubation - WT_Noincubation	10	0.0162447	0.015772	-0.140982	0.00636111	-0.182949	0.0127222	-0.0130678	0.000908729	Not corrected	0.000328154	0	Non significant
SARS-CoV-2	422	429	NYKLPDDF	6	WT_3hrincubation - WT_Noincubation	10	0.0289297	0.032913	0.0120637	0.0420115	0.0537081	0.0840231	0.00895135	0.0140038	Not corrected	0.422475	0	Non significant
SARS-CoV-2	423	429	YKLPDDF	5	WT_3hrincubation - WT_Noincubation	10	0.019783	0.0319241	-0.015991	0.0284497	0.050853	0.0568994	0.0101706	0.0113799	Not corrected	0.27801	0	Non significant
SARS-CoV-2	453	467	YRLFRKSNLKPFERD	13	WT_3hrincubation - WT_Noincubation	10	0.0465473	0.0204337	-0.0318692	0.0249867	-0.0401728	0.0749601	-0.00309021	0.00576616	Not corrected	0.612323	0	Non significant
SARS-CoV-2	456	467	FRKSNLKPFERD	10	WT_3hrincubation - WT_Noincubation	10	0.0666877	0.00850471	0.005921	0.0129391	0.133201	0.0258781	0.0133201	0.00258781	Not corrected	0.00550608	0	Non significant
SARS-CoV-2	456	470	FRKSNLKPFERDIST	13	WT_3hrincubation - WT_Noincubation	10	0.003349	0.0245573	-0.0138377	0.0262203	0.085445	0.104881	0.0065727	0.00806779	Not corrected	0.345261	0	Non significant
SARS-CoV-2	456	471	FRKSNLKPFERDISTE	14	WT_3hrincubation - WT_Noincubation	10	-0.0295643	0.0682064	-0.0216477	0.0422144	0.0413932	0.168858	0.00295666	0.0120613	Not corrected	0.733361	0	Non significant
SARS-CoV-2	495	510	YGFQPTNGVGYQPYRV	13	WT_3hrincubation - WT_Noincubation	10	0.00991033	0.0337604	0.145419	0.0941449	0.379315	0.18829	0.029178	0.0144838	Not corrected	0.0530662	0	Non significant
SARS-CoV-2	511	515	VVLSF	4	WT_3hrincubation - WT_Noincubation	10	-0.0334407	0.0367937	-0.153137	0.0295989	-0.0111664	0.0295989	-0.00279161	0.00739972	Not corrected	0.606462	0	Non significant
SARS-CoV-2	544	552	NGLTGTGVL	8	WT_3hrincubation - WT_Noincubation	10	-0.00157633	0.0324505	0.033147	0.079106	-0.0453678	0.079106	-0.00567098	0.00988826	Not corrected	0.604713	0	Non significant
SARS-CoV-2	546	552	LTGTGVL	6	WT_3hrincubation - WT_Noincubation	10	-0.00262417	0.0162235	0.00912967	0.123794	0.0529873	0.123794	0.00883122	0.0206323	Not corrected	0.691508	0	Non significant
SARS-CoV-2	553	565	TESNKKFLPFQQF	11	WT_3hrincubation - WT_Noincubation	10	0.0303797	0.0437808	-0.0936513	0.00930974	-0.171395	0.0279292	-0.0155813	0.00253902	Not corrected	0.00166705	0	Non significant
SARS-CoV-2	553	568	TESNKKFLPFQQFGRD	14	WT_3hrincubation - WT_Noincubation	10	0.030031	0.0300821	-0.256903	0.0328849	-0.369313	0.0657697	-0.0263795	0.00469784	Not corrected	0.0107831	0	Non significant
SARS-CoV-2	575	582	AVRDPQTL	6	WT_3hrincubation - WT_Noincubation	10	0.057144	0.0284452	-0.242844	0.0770085	-0.215907	0.0770085	-0.0359844	0.0128348	Not corrected	0.0255612	0	Non significant
SARS-CoV-2	575	583	AVRDPQTLE	7	WT_3hrincubation - WT_Noincubation	10	0.0787807	0.0527767	-0.124039	0.0481126	-0.153534	0.0962252	-0.0219335	0.0137465	Not corrected	0.137012	0	Non significant
SARS-CoV-2	576	582	VRDPQTL	5	WT_3hrincubation - WT_Noincubation	10	0.0886317	0.057527	-0.160009	0.0178038	-0.185079	0.0178038	-0.0370159	0.00356076	Not corrected	0.00406118	0	Non significant
SARS-CoV-2	576	583	VRDPQTLE	6	WT_3hrincubation - WT_Noincubation	10	0.072081	0.039441	-0.0206872	0.039316	-0.0140262	0.078632	-0.0023377	0.0131053	Not corrected	0.808225	0	Non significant
SARS-CoV-2	586	592	DITPCSF	5	WT_3hrincubation - WT_Noincubation	10	-0.00826933	0.0293769	-0.311387	0.0876168	-0.314155	0.0876168	-0.062831	0.0175234	Not corrected	0.0152471	0	Non significant
SARS-CoV-2	627	633	DQLTPTW	5	WT_3hrincubation - WT_Noincubation	10	-0.009157	0.0284222	-0.215701	0.0379079	-0.185161	0.0379079	-0.0370322	0.00758159	Not corrected	0.0111991	0	Non significant
SARS-CoV-2	716	720	TISVT	4	WT_3hrincubation - WT_Noincubation	10	0.049226	0.0316907	-0.089871	0.0215034	-0.0175057	0.0215034	-0.00437643	0.00537585	Not corrected	0.296412	0	Non significant
SARS-CoV-2	719	724	VTTEIL	5	WT_3hrincubation - WT_Noincubation	10	-0.00229167	0.015631	-0.104525	0.0630439	-0.108662	0.0630439	-0.0217323	0.0126088	Not corrected	0.0665757	0	Non significant
SARS-CoV-2	722	728	EILPVSM	5	WT_3hrincubation - WT_Noincubation	10	-0.018935	0.0317702	0.0465057	0.0141211	0.0328104	0.0141211	0.00656208	0.00282421	Not corrected	0.0330234	0	Non significant
SARS-CoV-2	750	756	LLQYGSF	6	WT_3hrincubation - WT_Noincubation	10	-0.026847	0.0376911	-0.275826	0.0452844	-0.192177	0.0452844	-0.0320296	0.0075474	Not corrected	0.0166771	0	Non significant
SARS-CoV-2	751	756	LQYGSF	5	WT_3hrincubation - WT_Noincubation	10	0.0129953	0.0273822	-0.252737	0.0522555	-0.257234	0.0522555	-0.0514467	0.0104511	Not corrected	0.0138156	0	Non significant
SARS-CoV-2	761	768	NRALTGIA	7	WT_3hrincubation - WT_Noincubation	10	0.0648223	0.024147	-0.267446	0.116902	-0.609538	0.116902	-0.0870769	0.0167003	Not corrected	0.0159261	0	Non significant
SARS-CoV-2	767	779	IAVEQDKNTQEVF	12	WT_3hrincubation - WT_Noincubation	10	0.0172543	0.0154455	-0.087209	0.0511368	0.0171969	0.102274	0.00143307	0.00852281	Not corrected	0.823389	0	Non significant
SARS-CoV-2	769	779	VEQDKNTQEVF	10	WT_3hrincubation - WT_Noincubation	10	0.0385103	0.0112001	-0.0497687	0.0392884	0.0548425	0.0785768	0.00548425	0.00785768	Not corrected	0.363171	0	Non significant
SARS-CoV-2	815	819	IEDLL	4	WT_3hrincubation - WT_Noincubation	10	-0.0141987	0.024863	-0.171632	0.0129173	-0.0339487	0.0129173	-0.00848719	0.00322933	Not corrected	0.0502018	0	Non significant
SARS-CoV-2	818	825	LLFNKVTL	7	WT_3hrincubation - WT_Noincubation	10	-0.025429	0.0478082	-0.0230253	0.0210817	0.0787713	0.0421634	0.011253	0.00602334	Not corrected	0.101869	0	Non significant
SARS-CoV-2	820	825	FNKVTL	5	WT_3hrincubation - WT_Noincubation	10	0.016754	0.0131428	-0.078147	0.0193332	-0.00830206	0.0386664	-0.00166041	0.00773329	Not corrected	0.763561	0	Non significant
SARS-CoV-2	826	830	ADAGF	4	WT_3hrincubation - WT_Noincubation	10	0.0380617	0.00867009	-0.0457313	0.0260037	-0.0537544	0.0260037	-0.0134386	0.00650092	Not corrected	0.0469904	0	Non significant
SARS-CoV-2	856	862	TVLPPLL	4	WT_3hrincubation - WT_Noincubation	10	-0.05692	0.0359994	-0.250653	0.0183031	-0.178744	0.0183031	-0.0446859	0.00457579	Not corrected	0.00437146	0	Non significant
SARS-CoV-2	900	910	AYRFNGIGVTQ	10	WT_3hrincubation - WT_Noincubation	10	-0.005934	0.00702831	-0.3961	0.0433292	-0.745101	0.0866585	-0.0745101	0.00866585	Not corrected	0.0585736	0	Non significant
SARS-CoV-2	914	919	YENQKL	5	WT_3hrincubation - WT_Noincubation	10	0.153322	0.0710311	-0.224245	0.0383618	-0.134017	0.0383618	-0.0268035	0.00767236	Not corrected	0.00720268	0	Non significant
SARS-CoV-2	920	924	IANQF	4	WT_3hrincubation - WT_Noincubation	10	0.027174	0.00944855	-0.280427	0.0138958	-0.198469	0.0138958	-0.0496174	0.00347396	Not corrected	0.000114326	0	Non significant
SARS-CoV-2	920	935	IANQFNSAIGKIQDSL	15	WT_3hrincubation - WT_Noincubation	10	-0.06142	0.0582394	-0.0456853	0.0575772	-0.111022	0.115154	-0.00740144	0.00767696	Not corrected	0.251615	0	Non significant
SARS-CoV-2	925	935	NSAIGKIQDSL	10	WT_3hrincubation - WT_Noincubation	10	0.0018515	0.0265723	-0.0507438	0.0199245	0.0766408	0.0398489	0.00766408	0.00398489	Not corrected	0.224168	0	Non significant
SARS-CoV-2	928	935	IGKIQDSL	7	WT_3hrincubation - WT_Noincubation	10	0.0169217	0.0157797	-0.18797	0.0885132	-0.298483	0.177026	-0.0426404	0.0252895	Not corrected	0.116797	0	Non significant
SARS-CoV-2	928	942	IGKIQDSLSSTASAL	14	WT_3hrincubation - WT_Noincubation	10	-0.00965433	0.0221757	-0.116138	0.0794958	-0.185407	0.158992	-0.0132434	0.0113565	Not corrected	0.215528	0	Non significant
SARS-CoV-2	948	958	VVNQNAQALNT	10	WT_3hrincubation - WT_Noincubation	10	0.085544	0.0734954	-0.119921	0.0629239	-0.226974	0.125848	-0.0226974	0.0125848	Not corrected	0.107168	0	Non significant
SARS-CoV-2	968	974	GAISSVL	6	WT_3hrincubation - WT_Noincubation	10	-0.001398	0.0277488	-0.359215	0.0185147	-0.205365	0.0185147	-0.0342275	0.00308578	Not corrected	0.000103564	0	Non significant
SARS-CoV-2	979	987	SRLDPPEAE	6	WT_3hrincubation - WT_Noincubation	10	0.059576	0.0285022	-0.14646	0.0107628	-0.0937211	0.0215256	-0.0156202	0.0035876	Not corrected	0.00445898	0	Non significant
SARS-CoV-2	999	1003	QSLQT	4	WT_3hrincubation - WT_Noincubation	10	0.152357	0.11527	-0.0302183	0.0739141	0.0366518	0.0739141	0.00916295	0.0184785	Not corrected	0.503317	0	Non significant
SARS-CoV-2	1004	1009	YVTQQL	5	WT_3hrincubation - WT_Noincubation	10	0.0170615	0.0080472	0.019124	0.0305539	0.0917507	0.0305539	0.0183501	0.00611078	Not corrected	0.148861	0	Non significant
SARS-CoV-2	1013	1021	AEIRASANL	8	WT_3hrincubation - WT_Noincubation	10	0.0250527	0.0180081	-0.173534	0.0488752	-0.24509	0.0977504	-0.0306363	0.0122188	Not corrected	0.0199236	0	Non significant
SARS-CoV-2	1047	1060	MSFPQSAPHGVVFL	11	WT_3hrincubation - WT_Noincubation	10	-0.0248033	0.0444046	0.0320943	0.018854	0.217454	0.037708	0.0197685	0.003428	Not corrected	0.00206432	0	Non significant
SARS-CoV-2	1100	1114	FVTQRNFYEPQIITT	13	WT_3hrincubation - WT_Noincubation	10	0.006189	0.0341366	-0.119436	0.038487	-0.185486	0.076974	-0.0142681	0.00592108	Not corrected	0.0451947	0	Non significant
SARS-CoV-2	1106	1114	FYEPQIITT	7	WT_3hrincubation - WT_Noincubation	10	-0.016935	0.0317009	0.0418107	0.0282718	0.0482568	0.0282718	0.00689382	0.00403883	Not corrected	0.0799515	0	Non significant
SARS-CoV-2	1106	1117	FYEPQIITTDNT	10	WT_3hrincubation - WT_Noincubation	10	-0.0218593	0.0351833	-0.092385	0.0527246	-0.216896	0.105449	-0.0216896	0.0105449	Not corrected	0.112698	0	Non significant
SARS-CoV-2	1145	1149	FKEEL	4	WT_3hrincubation - WT_Noincubation	10	0.034676	0.0119743	0.0959903	0.0489694	0.261708	0.0489694	0.0654271	0.0122423	Not corrected	0.0101092	0	Non significant
SARS-CoV-2	1198	1205	QELGKYEQ	7	WT_3hrincubation - WT_Noincubation	10	0.072891	0.0279632	-0.20913	0.107935	-0.283056	0.21587	-0.0404365	0.0308386	Not corrected	0.184239	0	Non significant
SARS-CoV-2	1198	1206	QELGKYEQY	8	WT_3hrincubation - WT_Noincubation	10	0.0308523	0.012661	-0.115114	0.0259222	-0.0309747	0.0518443	-0.00387184	0.00648054	Not corrected	0.457485	0	Non significant
SARS-CoV-2	1221	1225	GSGYI	4	WT_3hrincubation - WT_Noincubation	10	0.0122577	0.0109805	-0.348806	0.050832	-0.26904	0.050832	-0.0672599	0.012708	Not corrected	0.014433	0	Non significant
SARS-CoV-2	1235	1242	YVRKDGEW	7	WT_3hrincubation - WT_Noincubation	10	0.0699687	0.019016	-0.107193	0.0372994	-0.221368	0.0745988	-0.031624	0.010657	Not corrected	0.0379276	0	Non significant
SARS-CoV-2	1243	1247	VLLST	4	WT_3hrincubation - WT_Noincubation	10	0.003231	0.0074627	-0.123669	0.0268352	-0.154334	0.0268352	-0.0385836	0.00670881	Not corrected	0.00450708	0	Non significant
SARS-CoV-2	180	191	EGKQGNFKNLRE	11	WT_3hrincubation - WT_Noincubation	10	0.0529463	0.00556887	-0.284602	0.0458826	-0.496097	0.0917652	-0.0450998	0.00834229	Not corrected	0.00558153	0	Protected
SARS-CoV-2	306	313	FTVEKGIY	7	WT_3hrincubation - WT_Noincubation	10	0.0249487	0.013521	-0.334016	0.0182428	-0.496841	0.0364856	-0.0709773	0.00521223	Not corrected	0.000855141	0	Protected
SARS-CoV-2	306	317	FTVEKGIYQTSN	11	WT_3hrincubation - WT_Noincubation	10	0.013152	0.0159762	-0.314243	0.0410544	-0.566458	0.0821088	-0.0514962	0.00746443	Not corrected	0.00147019	0	Protected
SARS-CoV-2	388	392	NDLCF	4	WT_3hrincubation - WT_Noincubation	10	-0.0150793	0.0326713	-0.368104	0.0696812	-0.339633	0.0696812	-0.0849082	0.0174203	Not corrected	0.00287732	0	Protected
SARS-CoV-2	442	452	DSKVGGNYNYL	10	WT_3hrincubation - WT_Noincubation	10	0.0114387	0.0184734	-0.194713	0.0248375	-0.573131	0.0496751	-0.0573131	0.00496751	Not corrected	0.00195359	0	Protected
SARS-CoV-2	569	582	IADTTDAVRDPQTL	12	WT_3hrincubation - WT_Noincubation	10	0.00559667	0.014159	-0.346232	0.024834	-0.649529	0.049668	-0.0541274	0.004139	Not corrected	0.00105618	0	Protected
SARS-CoV-2	692	696	YTMSL	4	WT_3hrincubation - WT_Noincubation	10	0.00786933	0.0248619	-0.396902	0.0273955	-0.291039	0.0273955	-0.0727598	0.00684888	Not corrected	0.0012415	0	Protected
SARS-CoV-2	780	793	AQVKQIYKTPPIKD	11	WT_3hrincubation - WT_Noincubation	10	0.015492	0.0193312	-0.398528	0.0643925	-0.811704	0.128785	-0.0737913	0.0117077	Not corrected	0.00110663	0	Protected
SARS-CoV-2	856	863	TVLPPLLT	5	WT_3hrincubation - WT_Noincubation	10	-0.0690263	0.0401128	-0.595332	0.0384051	-0.608577	0.0384051	-0.121715	0.00768103	Not corrected	2.48684e-05	0	Protected
SARS-CoV-2	867	874	IAQYTSAL	7	WT_3hrincubation - WT_Noincubation	10	-0.00868733	0.014684	-1.25981	0.125843	-1.23526	0.125843	-0.176466	0.0179775	Not corrected	0.0012729	0	Protected
SARS-CoV-2	870	874	YTSAL	4	WT_3hrincubation - WT_Noincubation	10	0.029606	0.00803361	-0.486207	0.0392897	-0.42769	0.0392897	-0.106923	0.00982244	Not corrected	0.000435338	0	Protected
SARS-CoV-2	875	882	LAGTITSG	7	WT_3hrincubation - WT_Noincubation	10	0.062354	0.0443934	-1.27413	0.0890804	-1.2352	0.0890804	-0.176458	0.0127258	Not corrected	0.00146505	0	Protected
SARS-CoV-2	891	896	LQIPFA	4	WT_3hrincubation - WT_Noincubation	10	-0.0547797	0.0389025	-0.345206	0.0365536	-0.370916	0.0365536	-0.0927289	0.0091384	Not corrected	0.000109034	0	Protected
SARS-CoV-2	899	903	MAYRF	4	WT_3hrincubation - WT_Noincubation	10	0.0368853	0.0177328	-0.626285	0.0570305	-0.555423	0.0570305	-0.138856	0.0142576	Not corrected	0.00296411	0	Protected
SARS-CoV-2	899	913	MAYRFNGIGVTQNVL	14	WT_3hrincubation - WT_Noincubation	10	-0.0180697	0.0327104	-1.07443	0.0335327	-2.22634	0.0670655	-0.159024	0.00479039	Not corrected	3.57029e-06	0	Protected
SARS-CoV-2	900	913	AYRFNGIGVTQNVL	13	WT_3hrincubation - WT_Noincubation	10	0.0138672	0.0358923	-1.03437	0.067192	-1.94841	0.134384	-0.149877	0.0103372	Not corrected	0.00147505	0	Protected
SARS-CoV-2	904	913	NGIGVTQNVL	9	WT_3hrincubation - WT_Noincubation	10	-0.0233422	0.0183044	-1.32904	0.0561531	-1.32497	0.0561531	-0.147219	0.00623924	Not corrected	0.000734717	0	Protected
SARS-CoV-2	906	913	IGVTQNVL	7	WT_3hrincubation - WT_Noincubation	10	-0.00968333	0.0181484	-1.20189	0.0573471	-1.20957	0.0573471	-0.172796	0.00819244	Not corrected	0.000266535	0	Protected
SARS-CoV-2	936	942	SSTASAL	6	WT_3hrincubation - WT_Noincubation	10	0.0639557	0.0281074	-0.34816	0.0328023	-0.335231	0.0328023	-0.0558718	0.00546706	Not corrected	0.000156164	0	Protected
SARS-CoV-2	943	958	GKLQDVVNQNAQALNT	15	WT_3hrincubation - WT_Noincubation	10	-0.010729	0.017061	-0.483574	0.0247918	-0.871392	0.0495835	-0.0580928	0.00330557	Not corrected	0.00019161	0	Protected
SARS-CoV-2	959	967	LVKQLSSNF	8	WT_3hrincubation - WT_Noincubation	10	0.008263	0.0133979	-0.277825	0.0127971	-0.379191	0.0255942	-0.0473988	0.00319927	Not corrected	2.49526e-05	0	Protected
SARS-CoV-2	959	974	LVKQLSSNFGAISSVL	15	WT_3hrincubation - WT_Noincubation	10	-0.0571837	0.0476221	-0.933285	0.0641214	-1.79645	0.128243	-0.119763	0.00854952	Not corrected	0.00114205	0	Protected
SARS-CoV-2	960	967	VKQLSSNF	7	WT_3hrincubation - WT_Noincubation	10	0.025317	0.00523746	-0.309725	0.00976476	-0.622135	0.0195295	-0.0888765	0.00278993	Not corrected	0.00414808	0	Protected
SARS-CoV-2	979	989	SRLDPPEAEVQ	8	WT_3hrincubation - WT_Noincubation	10	0.023	0.018574	-0.262057	0.0170879	-0.393392	0.0341757	-0.049174	0.00427197	Not corrected	7.67497e-05	0	Protected
SARS-CoV-2	988	993	VQIDRL	5	WT_3hrincubation - WT_Noincubation	10	0.021937	0.0145176	-0.822719	0.0360923	-0.732672	0.0360923	-0.146534	0.00721846	Not corrected	0.000127184	0	Protected
SARS-CoV-2	988	998	VQIDRLITGRL	10	WT_3hrincubation - WT_Noincubation	10	0.0252593	0.0478003	-0.988707	0.0469972	-2.81888	0.140992	-0.281888	0.0140992	Not corrected	6.23971e-05	0	Protected
SARS-CoV-2	990	998	IDRLITGRL	8	WT_3hrincubation - WT_Noincubation	10	0.014626	0.0195584	-0.705247	0.0782725	-1.36251	0.156545	-0.170313	0.0195681	Not corrected	0.00226286	0	Protected
SARS-CoV-2	994	998	ITGRL	4	WT_3hrincubation - WT_Noincubation	10	0.0719413	0.0210393	-0.62142	0.075112	-0.511619	0.075112	-0.127905	0.018778	Not corrected	0.00257425	0	Protected
SARS-CoV-2	1015	1021	IRASANL	6	WT_3hrincubation - WT_Noincubation	10	0.0645463	0.0435057	-0.474521	0.0391948	-0.397348	0.0391948	-0.0662246	0.00653247	Not corrected	0.000224945	0	Protected
SARS-CoV-2	1243	1248	VLLSTF	5	WT_3hrincubation - WT_Noincubation	10	-0.0366727	0.0372679	-0.410695	0.0514347	-0.440824	0.0514347	-0.0881649	0.0102869	Not corrected	0.000214691	0	Protected
SARS-CoV-2	820	830	FNKVTLADAGF	10	WT_3hrincubation - WT_Noincubation	10	0.00573567	0.0319916	0.096257	0.0130131	0.337861	0.0260263	0.0337861	0.00260263	Not corrected	0.00166011	0	Deprotected
SARS-CoV-2	1047	1059	MSFPQSAPHGVVF	10	WT_3hrincubation - WT_Noincubation	10	0.0114407	0.0470274	0.097833	0.0233108	0.355414	0.0466216	0.0355414	0.00466216	Not corrected	0.001767	0	Deprotected
