# Supplementary material for: Timeline of changes in spike conformational dynamics in emergent SARS-CoV-2 variants reveal progressive stabilization of trimer stalk with altered NTD dynamics
Source: eLife. 2023 Mar 17;12:e82584. doi: 10.7554/eLife.82584 (PMC10049203; doi:10.7554/eLife.82584)
Supplement: Figure 3—source data 1. [file elife-82584-fig3-data1.xlsx]

## Sheet: D614G vs. WT
Sequence	Start	End	Modification	1	2	10	30
FTRGVYYPDKV	32	42		-0.3224	-0.4732	-0.5401	-0.6188
FTRGVYYPDKVF	32	43		-0.5165	-0.6285	-0.7044	-0.7169
FTRGVYYPDKVFRSSVL	32	48		-0.5206	-0.5664	-0.7129	-0.7961
HSTQDL	49	54		-0.0966	-0.1321	-0.1118	-0.0974
HSTQDLF	49	55		-0.0785	-0.0797	-0.094	0.0522
FASTEKSNIIRG	92	103		0.0735	-0.1021	-0.0731	-0.0649
STEKSNIIRG	94	103		0.1347	-0.1081	-0.0758	-0.125
FASTEKSNIIRGWIF	92	106		0.0685	-0.0711	-0.0852	-0.02
WIFGTTL	104	110		-0.0994	-0.0849	-0.1186	-0.0386
DSKTQSL	111	117		0.0381	0.0161	0.0079	0.0303
MDLEGKQGNF	177	186		0.0826	-0.3033	-0.0886	-0.0641
MDLEGKQGNFKNLRE	177	191		0.2049	-0.0084	0.0519	0.0575
EGKQGNFKNLRE	180	191		0.1276	-0.0795	-0.07	0.0816
FVFKNIDG	192	199		0.072	-0.0636	-0.0344	-0.0778
FVFKNIDGY	192	200		-0.1845	-0.1512	-0.1313	-0.1046
FVFKNIDGYF	192	201		-0.1175	-0.1645	-0.124	-0.1222
YFKIYSKHTPINL	200	212		0.0508	-0.0438	0.1003	0.0469
FKIYSKHTPINL	201	212		-0.4588	-0.2359	-0.2698	-0.2113
KIYSKHTPINL	202	212		0.1299	0.1269	0.1214	0.0807
VRDLPQGF	213	220		-0.2013	-0.3238	-0.3457	-0.2301
ALHRSYLTPGDSSSGWTAGAAA	243	264			0.532	0.3538	0.1481
HRSYLTPGDSSSGWTAGAAA	245	264		0.1296	-0.2427	-0.2347	-0.4491
HRSYLTPGDSSSGWTAGAAAY	245	265		-0.0136	0.4795	0.4748	0.4484
YYVGYLQPRTFL	265	276		0.2512	0.1955	0.0418	-0.0276
YVGYLQPRTFL	266	276		0.1185	0.1395	-0.0021	-0.0635
VGYLQPRTFL	267	276		0.1872	0.1011	0.0934	-0.0434
YLQPRTFL	269	276		0.0508	0.1369	0.067	0.0352
CALDPLSETKCTL	291	303		-0.8129	-1.0132	-1.0586	-1.0032
FTVEKGIY	306	313		-0.0061	-0.002	-0.055	-0.1974
FTVEKGIYQTSN	306	317		0.154	0.2547	0.0127
FTVEKGIYQTSNF	306	318		0.154	0.3195	0.2056	-0.1041
QTSNF	314	318		0.1088	0.2033	0.0564	-0.0206
FRVQPTES	318	325		0.2279	0.2481	0.2672	0.2535
YNSASF	369	374		-0.0495	-0.1139	-0.2073	-0.1652
NDLCF	388	392		0.0788	0.0754	-0.0486	-0.0608
FVIRGDE	400	406		0.0893	0.105	0.1203	0.0355
VIRGDEVRQIAPGQTGKIAD	401	420		0.0909	0.1107	0.4363	0.38
VRQIAPGQTGKIAD	407	420		-0.3573	-0.4046	-0.3826	-0.4332
VRQIAPGQTGKIADY	407	421		-0.3673	-0.5128	-0.4663	-0.3109
VRQIAPGQTGKIADYN	407	422		-0.1618	-0.3122	-0.3263	-0.3359
NYKLPDDF	422	429		-0.1985	-0.2808	-0.2178	-0.2416
YKLPDDF	423	429		-0.1189	-0.1674	-0.1149	-0.1654
DSKVGGNYNYL	442	452		0.5922	0.2053	0.2049	0.2783
KVGGNYNYL	444	452		-0.0272	0.0303	-0.1928	-0.1417
YRLFRKSNLKPFERD	453	467		0.1517	-0.1482	-0.053	-0.1689
FRKSNLKPFERD	456	467		-0.0572	-0.1968	-0.2192	-0.1634
FRKSNLKPFERDIST	456	470		0.0233	-0.0889	-0.0958	-0.1979
FRKSNLKPFERDISTE	456	471		0.0265	-0.0754	0.0417	0.0273
VVLSF	511	515		0.0104	-0.0054	-0.0153	0.0493
NFNGLTGTGVL	542	552		-0.1667	-0.1636	-0.146	-0.2392
NGLTGTGVL	544	552		-0.2668	-0.3113	-0.202	-0.2691
TESNKKFLPFQQF	553	565		-1.1773	-1.3376	-1.2269	-1.0287
TESNKKFLPFQQFGRD	553	568		-1.066	-1.4114	-1.5303	-1.1896
AVRDPQTL	575	582		-0.0633	-0.0108	-0.0054	-0.1187
AVRDPQTLE	575	583		-0.0347	-0.0144	-0.0321	-0.1915
VRDPQTL	576	582		-0.0527	0.0351	0.1514	0.1803
DITPCSF	586	592		-0.4611	-0.6664	-0.7272	-0.7053
DQLTPTW	627	633		-0.2429	-0.2839	-0.4767	-0.4335
RVYSTGSNVF	634	643		-0.4044	-0.5366	-0.5232	-0.4917
ASQSIIA	685	691		0.1072	-0.0876	-0.2317	-0.3669
SIIAY	688	692		-0.0677	-0.1909	-0.4921	-0.8154
YTMSL	692	696		-0.3207	-0.4404	-0.3709	-0.2676
TISVT	716	720		-0.0261	-0.0041	-0.0193	0.0052
TEILPVS	721	727		-0.1374	-0.1355	-0.1104	-0.1082
TEILPVSM	721	728		-0.0079	-0.0533	-0.0073	0.0279
LLQYGSF	750	756		-0.1166	-0.2204	-0.1949	-0.0986
LQYGSF	751	756		-0.3966	-0.3758	-0.3985	-0.3434
IAVEQDKNTQEVF	767	779		-0.0499	-0.1635	-0.0259	-0.1987
VEQDKNTQEVF	769	779		0.0249	0.0336	0.0264	-0.0809
AQVKQIYKTPPIKD	780	793		-1.0199	-0.8962	-0.6243	-0.4567
IEDLL	815	819		-0.0257	-0.0535	-0.0365	-0.0548
LLFNKVTL	818	825		0.0185	-0.0601	-0.1163	0.051
LFNKVTL	819	825		0.2011	0.092	0.0584	0.1307
FNKVTL	820	825		0.0399	-0.0084	0.008	0.0586
FNKVTLADAG	820	829		0.0271	0.2358	0.0578	0.1987
FNKVTLADAGF	820	830		-0.0682	-0.0703	-0.2791	-0.1126
NKVTLADAGF	821	830		0.1615	0.3703	0.1117	0.1966
ADAGF	826	830		0.0661	0.0147	0.0087	0.0562
TVLPPLL	856	862		-0.6221	-0.6133	-0.373	-0.3463
IAQYTSAL	867	874		-0.1792	-0.3592	-0.6507	-0.9247
YTSAL	870	874		-0.1472	-0.2987	-0.5237	-0.7033
LAGTITSG	875	882		-1.4059	-1.5868	-1.5323	-1.6193
MAYRF	899	903		-0.1925	-0.3743	-0.7158	-0.9705
MAYRFNGIGVTQNVL	899	913		-0.5212	-0.7578	-1.0413	-1.2511
AYRFNGIGVTQNVL	900	913		-0.5476	-0.9251	-1.2844	-1.741
YRFNGIGVTQNVL	901	913		-0.5809	-0.9706	-1.6075	-1.6963
NGIGVTQNVL	904	913		-0.5306	-0.8786	-1.3367	-1.5878
IGVTQNVL	906	913		-0.5715	-0.8358	-1.1768	-1.3279
YENQKL	914	919		-0.2395	-0.2769	-0.1535	-0.0944
IANQF	920	924		-0.0303	-0.0946	-0.2293	-0.4076
IANQFNSAIGKIQDSL	920	935		-0.1042	-0.1487	-0.3345	-0.4623
NSAIGKIQDSL	925	935		-0.2013	-0.319	-0.115	-0.1343
IGKIQDSL	928	935		-0.045	-0.0416	0.3454	0.2048
IGKIQDSLSSTASAL	928	942		-0.6199	-0.9459	-0.626	-0.5306
NSAIGKIQDSLSSTASALGKLQD	925	947		-0.674	-0.6808	-0.8434	-0.6542
SSTASAL	936	942		-0.165	-0.3338	-0.3653	-0.3301
GKLQDVVNQNAQALNT	943	958		-0.7611	-1.034	-0.3272	0.0349
QALNT	954	958		-0.3588	-0.3971	-0.4167	-0.2287
LVKQLSSNF	959	967		-0.7234	-0.8219	-0.362	-0.1825
LVKQLSSNFGAISSVL	959	974		0.2341	0.4645	0.9764	0.7947
GAISSVL	968	974		-0.35	-0.3855	-0.0116	0.0759
ILSRLDPPEAE	977	987		-0.2827	-0.3901	0.0159	0.0376
SRLDPPEAE	979	987		-0.3958	-0.3146	0.1005	0.1312
SRLDPPEAEVQ	979	989		-0.7434	-0.7832	-0.1148	0.1468
VQIDRLITGRL	988	998		-0.1642	-0.2655	0.0325	-0.1114
IDRLITGRL	990	998		-0.9562	-1.2905	-1.6837	-1.7
ITGRL	994	998		-0.2978	-0.5137	-0.7446	-0.8159
QSLQT	999	1003		-0.1546	-0.1441	-0.2182	-0.3053
YVTQQL	1004	1009		-0.1737	-0.1448	-0.1879	-0.2276
AEIRASANL	1013	1021		-0.4633	-0.4926	-0.7317	-0.9504
IRASANL	1015	1021		-0.3525	-0.4772	-0.6565	-0.8316
MSFPQSAPHGVVF	1047	1059		-0.2113	-0.217	-0.2565	-0.2287
PREGVF	1087	1092		-0.1404	-0.1323	-0.1376	-0.1384
FVTQRNFYEPQIITT	1100	1114		-0.7346	-0.7957	-0.6195	-0.6641
FYEPQIITT	1106	1114		-0.4687	-0.5786	-0.3357	-0.4152
QELGKYEQY	1198	1206		0.386	0.2814	0.2717	0.355
GSGYI	1221	1225		-0.3546	-0.4084	-0.1468	-0.0054
YVRKDGEW	1235	1242		0.1237	0.0609	0.2027	0.1312
VLLST	1243	1247		0.4179	0.1186	0.1362	0.1615
VLLSTF	1243	1248		0.3921	0.1622	0.3063	0.3164
