# Supplementary material for: Timeline of changes in spike conformational dynamics in emergent SARS-CoV-2 variants reveal progressive stabilization of trimer stalk with altered NTD dynamics
Source: eLife. 2023 Mar 17;12:e82584. doi: 10.7554/eLife.82584 (PMC10049203; doi:10.7554/eLife.82584)
Supplement: Figure 3—source data 2. [file elife-82584-fig3-data2.xlsx]

## Sheet: D614Ginc_minus_D614Gnoinc
				D614G incubated minus unincubated (Da)
Peptide Number	Sequence	Start	End	1 min	2 min	10 min
1	FTRGVYYPDKV	32	42	-0.1824	-0.2755	-0.2404
2	FTRGVYYPDKVF	32	43	-0.2195	-0.3284	-0.2795
3	FTRGVYYPDKVFRSSVL	32	48	-0.1425	-0.2136	-0.1624
4	HSTQDL	49	54	0.0037	-0.019	0.02
5	HSTQDLF	49	55	-0.075	-0.0655	-0.0486
6	HSTQDLFL	49	56	-0.0087	-0.0126	-0.0248
7	FASTEKSNIIRG	92	103	-0.2656	-0.3135	-0.0859
8	STEKSNIIRG	94	103	-0.3043	-0.3617	-0.1863
9	FASTEKSNIIRGWIF	92	106	-0.1557	-0.0227	0.0009
10	WIFGTTL	104	110	-0.0857	-0.0336	-0.1462
11	DSKTQSL	111	117	-0.0505	-0.0531	-0.0333
12	DSKTQSLL	111	118	0.1321	0.154	0.1834
13	MDLEGKQGNF	177	186	-0.365	-0.5839	-0.1489
14	MDLEGKQGNFKNLRE	177	191		-0.1242	-0.0146
15	EGKQGNFKNLRE	180	191	-0.3756	-0.3811	-0.284
16	FVFKNIDGY	192	200	-0.0962	-0.1264	-0.0803
17	FVFKNIDGYF	192	201	0.0357	0.0126	0.1067
18	YFKIYSKHTPINL	200	212	-0.1267	-0.1242	-0.0193
19	FKIYSKHTPINL	201	212	-0.1331	-0.1184	0.0021
20	KIYSKHTPINL	202	212	-0.0344	-0.0131	0.0857
21	VRDLPQGF	213	220	-0.3376	-0.3832	-0.1821
22	ALHRSYLTPGDSSSGWTAGAAA	243	264	-0.0998	-0.2242	0.5985
23	HRSYLTPGDSSSGWTAGAAA	245	264	-0.6864	-0.6108	0.1989
24	HRSYLTPGDSSSGWTAGAAAY	245	265	-0.499	-0.3216	0.5929
25	YYVGYLQPRTFL	265	276	0.2561	0.2081	0.0888
26	YVGYLQPRTFL	266	276	0.2372	0.2349	0.1998
27	VGYLQPRTFL	267	276	0.025	-0.0203	-0.1172
28	YLQPRTFL	269	276	0.0474	0.0627	0.0695
29	CALDPLSETKCTL	291	303	-0.3349	-0.2532	-0.1844
30	FTVEKGIY	306	313	-0.0075	0.0253	0.0368
31	FTVEKGIYQTSN	306	317	0.0016	-0.1386	0.0932
32	FTVEKGIYQTSNF	306	318	0.1438	0.1827	0.2997
33	KGIYQTSNF	310	318	-0.0038	-0.0374	0.1553
34	QTSNF	314	318	0.0481	0.0682	0.0513
35	FRVQPTES	318	325	0.0068	0.0883	0.2328
36	YNSASF	369	374	-0.2617	-0.2848	-0.1465
37	NDLCF	388	392	-0.1482	-0.2002	-0.2437
38	YADSF	396	400	-0.0258	-0.0544	-0.0522
39	FVIRGDE	400	406	0.0663	0.069	0.1315
40	VIRGDEVRQIAPGQTGKIAD	401	420	-0.1109	-0.1481	0.0938
41	VIRGDEVRQIAPGQTGKIADY	401	421	-0.2308	-0.4091	0.0627
42	VRQIAPGQTGKIAD	407	420	-0.4215	-0.4636	-0.4094
43	VRQIAPGQTGKIADY	407	421	-0.2808	-0.55	-0.3286
44	VRQIAPGQTGKIADYN	407	422	-0.2925	-0.3769	-0.2957
45	YNYKLPDDF	421	429	-0.2669	-0.181	-0.2149
46	NYKLPDDF	422	429	-0.2546	-0.173	-0.0973
47	YKLPDDF	423	429	-0.0807	-0.0577	0.0003
48	DSKVGGNYNYL	442	452	-0.1805	-0.1095	-0.0333
49	KVGGNYNYL	444	452	-0.133	0.2594	0.2402
50	YRLFRKSNLKPFERD	453	467	0.0601	0.0928	0.2101
51	FRKSNLKPFERD	456	467	-0.0474	-0.0822	0.0075
52	FRKSNLKPFERDIST	456	470	-0.0491	0.0083	0.1174
53	FRKSNLKPFERDISTE	456	471	-0.0266	0.0694	0.267
54	VVLSF	511	515	0.0574	0.0408	0.0225
55	NFNGLTGTGVL	542	552	-0.091	-0.1264	-0.1388
56	NGLTGTGVL	544	552	-0.1663	-0.2178	-0.1586
57	TESNKKFLPFQQF	553	565	-0.902	-0.8633	-0.5082
58	TESNKKFLPFQQFGRD	553	568	-0.7962	-0.7221	-0.3286
59	AVRDPQTL	575	582	-0.1225	-0.0565	0.0216
60	AVRDPQTLE	575	583	-0.0472	-0.0305	-0.048
61	VRDPQTL	576	582	-0.1163	-0.1241	-0.0204
62	DITPCSF	586	592	-0.7369	-0.7405	-0.8652
63	DQLTPTW	627	633	-0.5057	-0.4471	-0.4864
64	RVYSTGSNVF	634	643	-0.458	-0.5425	-0.4107
65	VASQSIIA	684	691	0.0015	-0.1074	-0.1936
66	ASQSIIA	685	691	-0.0986	-0.1152	-0.2404
67	SIIAY	688	692	-0.033	-0.113	-0.3966
68	YTMSL	692	696	-0.2353	-0.259	-0.1189
69	TISVT	716	720	-0.0302	-0.0143	-0.0223
70	TEILPVS	721	727	-0.0506	-0.043	-0.0079
71	TEILPVSM	721	728	0.0633	0.0381	0.1364
72	LLQYGSF	750	756	-0.1316	-0.1638	-0.0153
73	LQYGSF	751	756	-0.2187	-0.2158	-0.1225
74	NRALTGIA	761	768	-0.1464	-0.2336	-0.0958
75	IAVEQDKNTQEVF	767	779	-0.0467	-0.0504	0.0564
76	VEQDKNTQEVF	769	779	-0.0334	-0.002	0.033
77	AQVKQIYKTPPIKD	780	793	-0.6888	-0.577	-0.1912
78	IEDLL	815	819	0.0008	-0.0268	-0.0248
79	LLFNKVTL	818	825	0.0589	0.1102	0.1728
80	LFNKVTL	819	825	0.116	0.0614	0.2369
81	FNKVTL	820	825	-0.0778	-0.0631	0.0571
82	FNKVTLADAG	820	829	-0.0148	0.11	0.353
83	FNKVTLADAGF	820	830	0.0513	0.1331	0.3666
84	NKVTLADAGF	821	830	0.022	0.181	0.4016
85	ADAGF	826	830	-0.0363	-0.0193	0.0949
86	TVLPPLL	856	862	-0.322	-0.3136	-0.2137
87	IAQYTSAL	867	874	-0.0142	-0.1428	-0.3635
88	YTSAL	870	874	-0.0813	-0.1722	-0.2849
89	LAGTITSG	875	882	-0.8033	-0.9371	-0.9287
90	MAYRF	899	903	-0.1217	-0.1934	-0.4211
91	AYRFNGIGVTQ	900	910	-0.5042	-0.6377	-0.8444
92	MAYRFNGIGVTQNVL	899	913	-0.205	-0.326	-0.4319
93	AYRFNGIGVTQNVL	900	913	-0.2899	-0.4775	-0.7066
94	YRFNGIGVTQNVL	901	913	-0.4461	-0.6466	-0.8683
95	NGIGVTQNVL	904	913	-0.3487	-0.5493	-0.7908
96	IGVTQNVL	906	913	-0.3708	-0.5685	-0.7865
97	YENQKL	914	919	-0.1493	-0.1313	0.0321
98	IANQF	920	924	0.0249	-0.0085	-0.1025
99	IANQFNSAIGKIQDSL	920	935	-0.294	-0.2906	-0.1715
100	NSAIGKIQDSL	925	935	-0.2001	-0.3478	0.106
101	IGKIQDSL	928	935	-0.2257	-0.2423	0.1112
102	IGKIQDSLSSTASAL	928	942	-0.615	-0.6122	-0.0926
103	NSAIGKIQDSLSSTASALGKLQD	925	947	-1.0941	-0.8648	-0.3511
104	SSTASAL	936	942	-0.4565	-0.4475	-0.3057
105	KLQDVVNQN	944	952	-0.7016	-0.8104	-0.4829
106	GKLQDVVNQNAQALNT	943	958	-0.6494	-0.7796	-0.2489
107	QALNT	954	958	-0.2744	-0.3378	-0.2678
108	LVKQLSSNF	959	967	-0.3945	-0.4373	-0.118
109	VKQLSSNF	960	967	-0.7762	-0.7084	-0.3403
110	LVKQLSSNFGAISSVL	959	974	-0.5719	-0.6831	-0.3327
111	GAISSVL	968	974	-0.244	-0.2239	0.0747
112	ILSRLDPPEAE	977	987	-0.4175	-0.3797	0.0133
113	SRLDPPEAE	979	987	-0.2305	-0.1949	0.155
114	SRLDPPEAEVQ	979	989	-0.4752	-0.5151	-0.0699
115	VQIDRL	988	993	-0.4851	-0.5936	-0.4881
116	VQIDRLITGRL	988	998	-0.2078	-0.2032	-0.3631
117	IDRLITGRL	990	998	-0.5757	-0.6922	-0.8721
118	ITGRL	994	998	-0.1699	-0.3417	-0.4262
119	QSLQT	999	1003	-0.0578	-0.0588	-0.1149
120	YVTQQL	1004	1009	-0.0077	-0.0068	-0.0102
121	AEIRASANL	1013	1021	-0.2186	-0.2544	-0.3629
122	IRASANL	1015	1021	-0.1057	-0.2032	-0.3529
123	MSFPQSAPHGVVF	1047	1059	0.0312	0.0564	0.0265
124	PREGVF	1087	1092	-0.126	-0.1061	-0.0404
125	FVTQRNFYEPQIITT	1100	1114	-0.386	-0.423	-0.293
126	FYEPQIITT	1106	1114	-0.2855	-0.3272	-0.1411
127	DSFKEEL	1143	1149	-0.2555	-0.4032	-0.4866
128	QELGKYEQY	1198	1206	0.0529	0.0261	0.2882
129	GSGYI	1221	1225	-0.2365	-0.2733	-0.1552
130	YVRKDGEW	1235	1242	-0.0379	-0.0739	0.0269
131	VLLST	1243	1247	-0.0408	-0.0504	0.0916
132	VLLSTF	1243	1248	-0.1506	-0.1615	-0.0873
