# Supplementary material for: Timeline of changes in spike conformational dynamics in emergent SARS-CoV-2 variants reveal progressive stabilization of trimer stalk with altered NTD dynamics
Source: eLife. 2023 Mar 17;12:e82584. doi: 10.7554/eLife.82584 (PMC10049203; doi:10.7554/eLife.82584)
Supplement: Figure 3—source data 3. [file elife-82584-fig3-data3.xlsx]

## Sheet: Figure 3-Source Data 3- D614G v
Protein	Start	End	Sequence	MaxUptake	State	Exposure	RT_diff_ave	RT_diff_SD	Center_diff_ave	Center_diff_SD	Uptake_diff_ave	Uptake_diff_SD	RU_diff_ave	RU_diff_SD	Correction	Welch_pValue	BH_sig	Significance
SARS-CoV-2	32	42	FTRGVYYPDKV	9	D614G BR2 - WT SEP	1	-0.0162468	0.00499043	-0.13542	0.0214312	-0.237321	0.0428625	-0.026369	0.0047625	Not corrected	0.0129728	0	Non significant
SARS-CoV-2	32	48	FTRGVYYPDKVFRSSVL	15	D614G BR2 - WT SEP	1	-0.0250013	0.00547546	-0.255484	0.0256342	-0.985336	0.102537	-0.065689	0.00683577	Not corrected	0.0254715	0	Non significant
SARS-CoV-2	49	54	HSTQDL	5	D614G BR2 - WT SEP	1	0.0054425	0.00966006	-0.0064435	0.0275982	0.0250703	0.0275982	0.00501406	0.00551963	Not corrected	0.370974	0	Non significant
SARS-CoV-2	49	55	HSTQDLF	6	D614G BR2 - WT SEP	1	-0.0206168	0.00500354	-0.0194265	0.0397337	-0.0110815	0.0397337	-0.00184691	0.00662228	Not corrected	0.708464	0	Non significant
SARS-CoV-2	49	56	HSTQDLFL	7	D614G BR2 - WT SEP	1	-0.0320472	0.00583069	0.0404643	0.0469901	0.0918657	0.0469901	0.0131237	0.00671287	Not corrected	0.0747258	0	Non significant
SARS-CoV-2	85	91	PFNDGVY	5	D614G BR2 - WT SEP	1	-0.0109197	0.00302218	-0.110426	0.0322705	-0.108556	0.0322705	-0.0217111	0.0064541	Not corrected	0.0311984	0	Non significant
SARS-CoV-2	92	103	FASTEKSNIIRG	11	D614G BR2 - WT SEP	1	-0.010669	0.00491097	0.0181983	0.0144157	0.128065	0.0288314	0.0116423	0.00262104	Not corrected	0.109858	0	Non significant
SARS-CoV-2	92	106	FASTEKSNIIRGWIF	14	D614G BR2 - WT SEP	1	-0.0490027	0.0159063	0.0797573	0.0350974	0.18881	0.105292	0.0134864	0.00752087	Not corrected	0.142186	0	Non significant
SARS-CoV-2	93	103	ASTEKSNIIRG	10	D614G BR2 - WT SEP	1	-0.0109393	0.00481976	-0.0207382	0.0218337	0.0529832	0.0436674	0.00529832	0.00436674	Not corrected	0.189212	0	Non significant
SARS-CoV-2	94	103	STEKSNIIRG	9	D614G BR2 - WT SEP	1	-0.00925217	0.00562073	-0.00169533	0.0123548	0.0433752	0.0247096	0.00481946	0.00274551	Not corrected	0.119149	0	Non significant
SARS-CoV-2	104	110	WIFGTTL	6	D614G BR2 - WT SEP	1	-0.041866	0.00643405	-0.0784233	0.0261437	-0.0463287	0.0261437	-0.00772145	0.00435728	Not corrected	0.16721	0	Non significant
SARS-CoV-2	111	117	DSKTQSL	6	D614G BR2 - WT SEP	1	0.00867	0.011306	0.0333225	0.015199	0.0570225	0.015199	0.00950376	0.00253316	Not corrected	0.012901	0	Non significant
SARS-CoV-2	111	118	DSKTQSLL	7	D614G BR2 - WT SEP	1	-0.0155528	0.00607553	0.00673167	0.0147815	0.0843092	0.029563	0.0120442	0.00422328	Not corrected	0.126865	0	Non significant
SARS-CoV-2	177	186	MDLEGKQGNF	9	D614G BR2 - WT SEP	1	-0.0118805	0.00555873	-0.0351367	0.0344848	0.0207202	0.0689696	0.00230225	0.00766329	Not corrected	0.687247	0	Non significant
SARS-CoV-2	177	191	MDLEGKQGNFKNLRE	14	D614G BR2 - WT SEP	1	-0.0106865	0.0042577	0.0453118	0.0194794	0.253835	0.0584381	0.018131	0.00417415	Not corrected	0.0166464	0	Non significant
SARS-CoV-2	180	191	EGKQGNFKNLRE	11	D614G BR2 - WT SEP	1	-0.0103515	0.00794962	0.0206547	0.0179407	0.0766548	0.0358814	0.00696862	0.00326195	Not corrected	0.0803992	0	Non significant
SARS-CoV-2	192	199	FVFKNIDG	7	D614G BR2 - WT SEP	1	-0.0228048	0.00470809	0.0167845	0.011513	0.0485093	0.023026	0.00692989	0.00328943	Not corrected	0.0674558	0	Non significant
SARS-CoV-2	192	200	FVFKNIDGY	8	D614G BR2 - WT SEP	1	-0.0286055	0.00838845	-0.0206152	0.0220612	-0.00289895	0.0441224	-0.000362369	0.0055153	Not corrected	0.943665	0	Non significant
SARS-CoV-2	192	201	FVFKNIDGYF	9	D614G BR2 - WT SEP	1	-0.0359867	0.00653931	-0.0252323	0.00764341	0.0649688	0.0152868	0.00721876	0.00169853	Not corrected	0.0432217	0	Non significant
SARS-CoV-2	195	201	KNIDGYF	6	D614G BR2 - WT SEP	1	-0.0206537	0.00498614	0.005165	0.0505788	0.0271877	0.0505788	0.00453129	0.00842979	Not corrected	0.656607	0	Non significant
SARS-CoV-2	200	212	YFKIYSKHTPINL	11	D614G BR2 - WT SEP	1	-0.0233023	0.00649204	-0.00603933	0.0253444	-0.0415038	0.0760333	-0.00377307	0.00691211	Not corrected	0.496969	0	Non significant
SARS-CoV-2	201	212	FKIYSKHTPINL	10	D614G BR2 - WT SEP	1	-0.0229253	0.00782904	-0.032918	0.0138146	-0.0574918	0.0414438	-0.00574918	0.00414438	Not corrected	0.319368	0	Non significant
SARS-CoV-2	202	212	KIYSKHTPINL	9	D614G BR2 - WT SEP	1	-0.0210887	0.00850117	0.0398092	0.0194206	0.138917	0.0388412	0.0154353	0.00431569	Not corrected	0.114527	0	Non significant
SARS-CoV-2	213	220	VRDLPQGF	6	D614G BR2 - WT SEP	1	-0.0218438	0.00582477	-0.0553148	0.1656	-0.0944592	0.3312	-0.0157432	0.0552001	Not corrected	0.701727	0	Non significant
SARS-CoV-2	245	264	HRSYLTPGDSSSGWTAGAAA	18	D614G BR2 - WT SEP	1	-0.0155108	0.00632858	0.016272	0.133874	0.0455218	0.267748	0.00252899	0.0148749	Not corrected	0.817115	0	Non significant
SARS-CoV-2	245	265	HRSYLTPGDSSSGWTAGAAAY	19	D614G BR2 - WT SEP	1	-0.0177845	0.00624509	-0.0216978	0.111561	-0.00425123	0.334682	-0.000223749	0.0176149	Not corrected	0.986091	0	Non significant
SARS-CoV-2	266	276	YVGYLQPRTFL	9	D614G BR2 - WT SEP	1	-0.0408185	0.00661417	0.127439	0.016631	0.410013	0.033262	0.045557	0.00369578	Not corrected	0.0236134	0	Non significant
SARS-CoV-2	269	276	YLQPRTFL	6	D614G BR2 - WT SEP	1	-0.0295727	0.00612743	0.131675	0.0239662	0.315438	0.0479324	0.052573	0.00798874	Not corrected	0.0579075	0	Non significant
SARS-CoV-2	291	303	CALDPLSETKCTL	11	D614G BR2 - WT SEP	1	-0.0303308	0.0077877	0.007896	0.0652762	0.0623571	0.130552	0.00566883	0.0118684	Not corrected	0.540431	0	Non significant
SARS-CoV-2	306	313	FTVEKGIY	7	D614G BR2 - WT SEP	1	-0.0169178	0.00573673	-0.0350358	0.0214801	-0.010542	0.0429603	-0.001506	0.00613718	Not corrected	0.740419	0	Non significant
SARS-CoV-2	306	317	FTVEKGIYQTSN	11	D614G BR2 - WT SEP	1	-0.0174582	0.00545542	0.143507	0.0267925	0.334278	0.0535849	0.0303889	0.00487136	Not corrected	0.0327813	0	Non significant
SARS-CoV-2	310	318	KGIYQTSNF	8	D614G BR2 - WT SEP	1	-0.0152013	0.00608058	0.0292317	0.0425581	0.147256	0.0851161	0.0184071	0.0106395	Not corrected	0.091068	0	Non significant
SARS-CoV-2	318	325	FRVQPTES	6	D614G BR2 - WT SEP	1	-0.00769667	0.0079737	0.14619	0.0819327	0.361477	0.163865	0.0602461	0.0273109	Not corrected	0.0717686	0	Non significant
SARS-CoV-2	369	374	YNSASF	5	D614G BR2 - WT SEP	1	-0.00726067	0.00415187	-0.133621	0.0918982	-0.106981	0.0918982	-0.0213961	0.0183796	Not corrected	0.20717	0	Non significant
SARS-CoV-2	388	392	NDLCF	4	D614G BR2 - WT SEP	1	-0.0263063	0.00511299	-0.0615567	0.0443896	-0.0349728	0.0443896	-0.00874319	0.0110974	Not corrected	0.343924	0	Non significant
SARS-CoV-2	396	400	YADSF	4	D614G BR2 - WT SEP	1	-0.009457	0.00391772	0.0358257	0.0483473	0.0483308	0.0483473	0.0120827	0.0120868	Not corrected	0.254701	0	Non significant
SARS-CoV-2	400	406	FVIRGDE	6	D614G BR2 - WT SEP	1	-0.0106225	0.00400591	0.0300973	0.01891	0.110854	0.0378201	0.0184756	0.00630335	Not corrected	0.103911	0	Non significant
SARS-CoV-2	401	420	VIRGDEVRQIAPGQTGKIAD	18	D614G BR2 - WT SEP	1	-0.00908683	0.00725654	-0.0223828	0.0754478	0.0397226	0.226343	0.00220681	0.0125746	Not corrected	0.811224	0	Non significant
SARS-CoV-2	401	421	VIRGDEVRQIAPGQTGKIADY	19	D614G BR2 - WT SEP	1	-0.015754	0.00693251	-0.0263885	0.0125899	-0.061656	0.0377696	-0.00324505	0.00198787	Not corrected	0.109691	0	Non significant
SARS-CoV-2	407	420	VRQIAPGQTGKIAD	12	D614G BR2 - WT SEP	1	-0.0129145	0.00521994	-0.106938	0.0679059	-0.16716	0.135812	-0.01393	0.0113177	Not corrected	0.192206	0	Non significant
SARS-CoV-2	407	422	VRQIAPGQTGKIADYN	14	D614G BR2 - WT SEP	1	-0.0112505	0.00585454	-0.0489378	0.0473605	-0.105981	0.094721	-0.00757006	0.00676578	Not corrected	0.21851	0	Non significant
SARS-CoV-2	421	429	YNYKLPDDF	7	D614G BR2 - WT SEP	1	-0.0268952	0.00520641	-0.108119	0.0388126	-0.163108	0.0776251	-0.0233012	0.0110893	Not corrected	0.204865	0	Non significant
SARS-CoV-2	422	429	NYKLPDDF	6	D614G BR2 - WT SEP	1	-0.0238682	0.00498741	-0.0814363	0.0452693	-0.132614	0.0905386	-0.0221023	0.0150898	Not corrected	0.15053	0	Non significant
SARS-CoV-2	423	429	YKLPDDF	5	D614G BR2 - WT SEP	1	-0.0250113	0.00580367	-0.0858828	0.0190921	-0.0920681	0.0381842	-0.0184136	0.00763685	Not corrected	0.0424512	0	Non significant
SARS-CoV-2	442	452	DSKVGGNYNYL	10	D614G BR2 - WT SEP	1	-0.0159852	0.00583674	-0.0562455	0.0743619	-0.081491	0.148724	-0.0081491	0.0148724	Not corrected	0.485305	0	Non significant
SARS-CoV-2	444	452	KVGGNYNYL	8	D614G BR2 - WT SEP	1	-0.023497	0.00765833	0.150965	0.0454171	0.344481	0.0908342	0.0430602	0.0113543	Not corrected	0.0491193	0	Non significant
SARS-CoV-2	456	467	FRKSNLKPFERD	10	D614G BR2 - WT SEP	1	-0.0100032	0.00487787	0.002727	0.0106242	0.0512263	0.0212483	0.00512263	0.00212483	Not corrected	0.0561171	0	Non significant
SARS-CoV-2	456	470	FRKSNLKPFERDIST	13	D614G BR2 - WT SEP	1	-0.014856	0.00782052	0.0408012	0.0300156	0.229221	0.120062	0.0176324	0.00923557	Not corrected	0.093129	0	Non significant
SARS-CoV-2	456	471	FRKSNLKPFERDISTE	14	D614G BR2 - WT SEP	1	-0.0118528	0.00539418	0.015123	0.0286102	0.107234	0.0858306	0.0076596	0.00613076	Not corrected	0.214525	0	Non significant
SARS-CoV-2	497	505	FQPTNGVGY	7	D614G BR2 - WT SEP	1	-0.031656	0.00637283	-0.0150185	0.0290756	-0.00681137	0.0290756	-0.000973053	0.00415365	Not corrected	0.756504	0	Non significant
SARS-CoV-2	511	515	VVLSF	4	D614G BR2 - WT SEP	1	-0.0322535	0.00676521	-0.0500187	0.0201385	0.0104764	0.0201385	0.0026191	0.00503463	Not corrected	0.536942	0	Non significant
SARS-CoV-2	542	552	NFNGLTGTGVL	10	D614G BR2 - WT SEP	1	-0.0308385	0.00647322	-0.0484823	0.0485164	-0.0420043	0.0485164	-0.00420043	0.00485164	Not corrected	0.301484	0	Non significant
SARS-CoV-2	544	552	NGLTGTGVL	8	D614G BR2 - WT SEP	1	-0.0241408	0.00583027	-0.216075	0.0330893	-0.195832	0.0330893	-0.024479	0.00413617	Not corrected	0.00898046	0	Non significant
SARS-CoV-2	553	568	TESNKKFLPFQQFGRD	14	D614G BR2 - WT SEP	1	-0.0206735	0.00568518	-0.799782	0.0528946	-2.28744	0.158684	-0.163388	0.0113346	Not corrected	0.0117352	0	Non significant
SARS-CoV-2	575	583	AVRDPQTLE	7	D614G BR2 - WT SEP	1	-0.014064	0.00406311	-0.0430182	0.0521706	-0.0026381	0.104341	-0.000376872	0.0149059	Not corrected	0.972523	0	Non significant
SARS-CoV-2	576	582	VRDPQTL	5	D614G BR2 - WT SEP	1	-0.0113428	0.00472515	-0.0148603	0.0150541	0.0143692	0.0150541	0.00287384	0.00301083	Not corrected	0.336398	0	Non significant
SARS-CoV-2	586	592	DITPCSF	5	D614G BR2 - WT SEP	1	-0.0231093	0.00620098	-0.617159	0.108581	-0.586852	0.108581	-0.11737	0.0217162	Not corrected	0.0139157	0	Non significant
SARS-CoV-2	627	633	DQLTPTW	5	D614G BR2 - WT SEP	1	-0.022212	0.00546839	0.363338	0.316422	0.379021	0.316422	0.0758041	0.0632844	Not corrected	0.204173	0	Non significant
SARS-CoV-2	634	643	RVYSTGSNVF	9	D614G BR2 - WT SEP	1	-0.0172747	0.00500133	0.060799	0.16135	0.0557911	0.16135	0.00619901	0.0179277	Not corrected	0.645775	0	Non significant
SARS-CoV-2	664	682	IPIGAGICASYQTQTNSPA	16	D614G BR2 - WT SEP	1	-0.0297158	0.00568407	-0.0957847	0.0386225	-0.207513	0.115868	-0.0129695	0.00724172	Not corrected	0.0873991	0	Non significant
SARS-CoV-2	685	691	ASQSIIA	6	D614G BR2 - WT SEP	1	-0.0117853	0.00426483	-0.0360192	0.131441	-0.0484793	0.131441	-0.00807988	0.0219068	Not corrected	0.624774	0	Non significant
SARS-CoV-2	688	692	SIIAY	4	D614G BR2 - WT SEP	1	-0.0183407	0.00580654	-0.161598	0.079987	-0.189224	0.079987	-0.047306	0.0199967	Not corrected	0.0827755	0	Non significant
SARS-CoV-2	716	720	TISVT	4	D614G BR2 - WT SEP	1	-0.008684	0.00432184	0.0226312	0.0373784	0.0367076	0.0373784	0.0091769	0.0093446	Not corrected	0.28791	0	Non significant
SARS-CoV-2	721	727	TEILPVS	5	D614G BR2 - WT SEP	1	-0.0239532	0.00784227	-0.0264887	0.0164824	-0.0532473	0.0164824	-0.0106495	0.00329649	Not corrected	0.155061	0	Non significant
SARS-CoV-2	721	728	TEILPVSM	6	D614G BR2 - WT SEP	1	-0.0327385	0.00755191	-0.0560285	0.0164533	-0.0191062	0.0164533	-0.00318436	0.00274221	Not corrected	0.240982	0	Non significant
SARS-CoV-2	750	756	LLQYGSF	6	D614G BR2 - WT SEP	1	-0.0272437	0.00542348	-0.222192	0.0601156	-0.206929	0.0601156	-0.0344881	0.0100193	Not corrected	0.0318685	0	Non significant
SARS-CoV-2	751	756	LQYGSF	5	D614G BR2 - WT SEP	1	-0.0191472	0.00427176	-0.240449	0.0672753	-0.23611	0.0672753	-0.047222	0.0134551	Not corrected	0.0317929	0	Non significant
SARS-CoV-2	761	768	NRALTGIA	7	D614G BR2 - WT SEP	1	-0.0132987	0.00524451	-0.103435	0.0146612	-0.0850804	0.0146612	-0.0121543	0.00209446	Not corrected	0.0505472	0	Non significant
SARS-CoV-2	767	779	IAVEQDKNTQEVF	12	D614G BR2 - WT SEP	1	-0.0212942	0.00545972	-0.0826553	0.0262349	-0.110686	0.0524697	-0.00922387	0.00437248	Not corrected	0.233977	0	Non significant
SARS-CoV-2	769	779	VEQDKNTQEVF	10	D614G BR2 - WT SEP	1	-0.0108803	0.00545575	-0.0389355	0.0126773	-0.0176232	0.0253545	-0.00176232	0.00253545	Not corrected	0.435411	0	Non significant
SARS-CoV-2	815	819	IEDLL	4	D614G BR2 - WT SEP	1	-0.0287932	0.00569239	-0.0821945	0.0113452	-0.0314414	0.0113452	-0.00786034	0.0028363	Not corrected	0.0736057	0	Non significant
SARS-CoV-2	818	825	LLFNKVTL	7	D614G BR2 - WT SEP	1	-0.0394353	0.00684688	0.0301685	0.0207457	0.133722	0.0414915	0.0191032	0.00592736	Not corrected	0.0373173	0	Non significant
SARS-CoV-2	819	825	LFNKVTL	6	D614G BR2 - WT SEP	1	-0.0289765	0.00751735	0.0991935	0.0174562	0.2167	0.0349124	0.0361167	0.00581874	Not corrected	0.0629803	0	Non significant
SARS-CoV-2	820	829	FNKVTLADAG	9	D614G BR2 - WT SEP	1	-0.0158143	0.00651769	0.070404	0.0566984	0.216933	0.113397	0.0241037	0.0125996	Not corrected	0.0740469	0	Non significant
SARS-CoV-2	820	830	FNKVTLADAGF	10	D614G BR2 - WT SEP	1	-0.0323663	0.00706975	0.0379572	0.0268239	0.168607	0.0536478	0.0168607	0.00536478	Not corrected	0.0378238	0	Non significant
SARS-CoV-2	821	830	NKVTLADAGF	9	D614G BR2 - WT SEP	1	-0.0246208	0.00583401	0.0421297	0.0147187	0.0896877	0.0294374	0.0099653	0.00327082	Not corrected	0.0241749	0	Non significant
SARS-CoV-2	826	830	ADAGF	4	D614G BR2 - WT SEP	1	-0.00603083	0.00317582	-0.021343	0.0190551	-0.0131456	0.0190551	-0.00328639	0.00476377	Not corrected	0.494076	0	Non significant
SARS-CoV-2	856	862	TVLPPLL	4	D614G BR2 - WT SEP	1	-0.0420428	0.00659395	-0.816352	0.0575227	-0.776216	0.0575227	-0.194054	0.0143807	Not corrected	0.0219099	0	Non significant
SARS-CoV-2	867	874	IAQYTSAL	7	D614G BR2 - WT SEP	1	-0.0151278	0.00568433	-0.348619	0.0558751	-0.342753	0.0558751	-0.0489647	0.00798216	Not corrected	0.0503437	0	Non significant
SARS-CoV-2	870	874	YTSAL	4	D614G BR2 - WT SEP	1	-0.01014	0.00421692	-0.245002	0.0486268	-0.234769	0.0486268	-0.0586923	0.0121567	Not corrected	0.0191679	0	Non significant
SARS-CoV-2	899	903	MAYRF	4	D614G BR2 - WT SEP	1	-0.0182813	0.00520003	-0.248188	0.0475832	-0.216196	0.0475832	-0.054049	0.0118958	Not corrected	0.0969186	0	Non significant
SARS-CoV-2	899	913	MAYRFNGIGVTQNVL	14	D614G BR2 - WT SEP	1	-0.0346603	0.00710242	-0.556352	0.0769314	-1.03429	0.153863	-0.0738776	0.0109902	Not corrected	0.07989	0	Non significant
SARS-CoV-2	900	910	AYRFNGIGVTQ	10	D614G BR2 - WT SEP	1	-0.0175537	0.00600246	-0.412866	0.0968641	-0.72598	0.193728	-0.072598	0.0193728	Not corrected	0.0172772	0	Non significant
SARS-CoV-2	900	913	AYRFNGIGVTQNVL	13	D614G BR2 - WT SEP	1	-0.028464	0.00764394	-0.531296	0.0646497	-1.02412	0.129299	-0.0787784	0.0099461	Not corrected	0.0333618	0	Non significant
SARS-CoV-2	901	913	YRFNGIGVTQNVL	12	D614G BR2 - WT SEP	1	-0.0290498	0.00659968	-0.561825	0.045545	-1.05765	0.0910899	-0.0881378	0.00759083	Not corrected	0.0485485	0	Non significant
SARS-CoV-2	904	913	NGIGVTQNVL	9	D614G BR2 - WT SEP	1	-0.0243122	0.00655796	-0.825865	0.0799855	-0.815037	0.0799855	-0.0905597	0.00888727	Not corrected	0.0221329	0	Non significant
SARS-CoV-2	906	913	IGVTQNVL	7	D614G BR2 - WT SEP	1	-0.023134	0.00675011	-0.746293	0.0833434	-0.699643	0.0833434	-0.099949	0.0119062	Not corrected	0.0121755	0	Non significant
SARS-CoV-2	914	919	YENQKL	5	D614G BR2 - WT SEP	1	-0.0149522	0.0120065	-0.281991	0.0276566	-0.514944	0.0553133	-0.102989	0.0110627	Not corrected	0.0150967	0	Non significant
SARS-CoV-2	920	924	IANQF	4	D614G BR2 - WT SEP	1	-0.00893317	0.00482457	-0.0986753	0.0137706	-0.0675316	0.0137706	-0.0168829	0.00344266	Not corrected	0.0282015	0	Non significant
SARS-CoV-2	920	935	IANQFNSAIGKIQDSL	15	D614G BR2 - WT SEP	1	-0.0371997	0.00552558	-0.0125865	0.0375776	-0.00942661	0.0751552	-0.000628441	0.00501034	Not corrected	0.885111	0	Non significant
SARS-CoV-2	925	935	NSAIGKIQDSL	10	D614G BR2 - WT SEP	1	-0.0224582	0.00550554	-0.0625938	0.0321334	-0.0890935	0.0642668	-0.00890935	0.00642668	Not corrected	0.141428	0	Non significant
SARS-CoV-2	925	947	NSAIGKIQDSLSSTASALGKLQD	22	D614G BR2 - WT SEP	1	-0.031287	0.0056594	-0.154269	0.0404646	-0.324757	0.0809292	-0.0147617	0.0036786	Not corrected	0.0545746	0	Non significant
SARS-CoV-2	928	935	IGKIQDSL	7	D614G BR2 - WT SEP	1	-0.0188507	0.00500345	-0.0728618	0.0520604	-0.101676	0.104121	-0.0145251	0.0148744	Not corrected	0.26771	0	Non significant
SARS-CoV-2	928	942	IGKIQDSLSSTASAL	14	D614G BR2 - WT SEP	1	-0.022426	0.00544419	-0.183402	0.0703643	-0.367653	0.140729	-0.0262609	0.010052	Not corrected	0.0360198	0	Non significant
SARS-CoV-2	936	942	SSTASAL	6	D614G BR2 - WT SEP	1	-0.006456	0.00366476	-0.315992	0.151703	-0.291028	0.151703	-0.0485047	0.0252838	Not corrected	0.0960411	0	Non significant
SARS-CoV-2	943	958	GKLQDVVNQNAQALNT	15	D614G BR2 - WT SEP	1	-0.00902933	0.00559052	-0.600448	0.104424	-1.23609	0.208848	-0.0824062	0.0139232	Not corrected	0.0828137	0	Non significant
SARS-CoV-2	954	958	QALNT	4	D614G BR2 - WT SEP	1	0.0024735	0.0117681	-0.384733	0.0540352	-0.38122	0.0540352	-0.0953051	0.0135088	Not corrected	0.0586209	0	Non significant
SARS-CoV-2	959	974	LVKQLSSNFGAISSVL	15	D614G BR2 - WT SEP	1	-0.0350733	0.00709955	-1.12968	0.201717	-2.25079	0.403435	-0.150053	0.0268957	Not corrected	0.0972226	0	Non significant
SARS-CoV-2	977	987	ILSRLDPPEAE	8	D614G BR2 - WT SEP	1	-0.0141817	0.00820577	-0.730792	0.0916225	-1.47308	0.183245	-0.184134	0.0229056	Not corrected	0.0595353	0	Non significant
SARS-CoV-2	979	989	SRLDPPEAEVQ	8	D614G BR2 - WT SEP	1	-0.0109783	0.00486607	-0.862798	0.0997894	-1.71598	0.199579	-0.214498	0.0249474	Not corrected	0.0264783	0	Non significant
SARS-CoV-2	988	993	VQIDRL	5	D614G BR2 - WT SEP	1	-0.0145952	0.00625577	-1.37238	0.104282	-1.32374	0.104282	-0.264748	0.0208564	Not corrected	0.0139983	0	Non significant
SARS-CoV-2	988	998	VQIDRLITGRL	10	D614G BR2 - WT SEP	1	-0.0265798	0.00525709	-0.894441	0.113922	-1.77336	0.227844	-0.177336	0.0227844	Not corrected	0.068543	0	Non significant
SARS-CoV-2	990	998	IDRLITGRL	8	D614G BR2 - WT SEP	1	-0.023121	0.00603842	-0.623884	0.0846525	-1.19802	0.169305	-0.149752	0.0211631	Not corrected	0.0607382	0	Non significant
SARS-CoV-2	999	1003	QSLQT	4	D614G BR2 - WT SEP	1	0.0045545	0.0160016	-0.0958872	0.0262509	-0.0325828	0.0262509	-0.0081457	0.00656271	Not corrected	0.39012	0	Non significant
SARS-CoV-2	1004	1009	YVTQQL	5	D614G BR2 - WT SEP	1	-0.00941933	0.00533167	-0.068352	0.0267604	-0.0246455	0.0267604	-0.0049291	0.00535207	Not corrected	0.36048	0	Non significant
SARS-CoV-2	1013	1017	AEIRA	4	D614G BR2 - WT SEP	1	0.00150017	0.00930604	-0.24654	0.038519	-0.209596	0.038519	-0.0523989	0.00962976	Not corrected	0.0821601	0	Non significant
SARS-CoV-2	1015	1021	IRASANL	6	D614G BR2 - WT SEP	1	-0.0115353	0.00468519	-0.241538	0.041656	-0.249408	0.041656	-0.041568	0.00694267	Not corrected	0.034478	0	Non significant
SARS-CoV-2	1047	1059	MSFPQSAPHGVVF	10	D614G BR2 - WT SEP	1	-0.0346225	0.00560214	-0.0105707	0.0225	0.0198688	0.0450001	0.00198688	0.00450001	Not corrected	0.563707	0	Non significant
SARS-CoV-2	1087	1092	PREGVF	4	D614G BR2 - WT SEP	1	-0.0142672	0.00519778	-0.091783	0.0327164	-0.063906	0.0327164	-0.0159765	0.0081791	Not corrected	0.0825807	0	Non significant
SARS-CoV-2	1100	1114	FVTQRNFYEPQIITT	13	D614G BR2 - WT SEP	1	-0.0294955	0.00555469	-0.356677	0.0405231	-0.692371	0.0810461	-0.0532593	0.00623432	Not corrected	0.0527354	0	Non significant
SARS-CoV-2	1106	1114	FYEPQIITT	7	D614G BR2 - WT SEP	1	-0.0257718	0.00799358	-0.337267	0.0466643	-0.345061	0.0466643	-0.0492944	0.00666633	Not corrected	0.0106118	0	Non significant
SARS-CoV-2	1243	1247	VLLST	4	D614G BR2 - WT SEP	1	-0.0166333	0.00489055	0.0399017	0.0277884	0.0483931	0.0277884	0.0120983	0.00694709	Not corrected	0.26424	0	Non significant
SARS-CoV-2	1243	1248	VLLSTF	5	D614G BR2 - WT SEP	1	-0.0337592	0.00700711	0.0117553	0.0951703	0.0310415	0.0951703	0.0062083	0.0190341	Not corrected	0.77583	0	Non significant
SARS-CoV-2	32	43	FTRGVYYPDKVF	10	D614G BR2 - WT SEP	1	-0.0263382	0.00605827	-0.20184	0.0298481	-0.578294	0.0895443	-0.0578294	0.00895443	Not corrected	0.00406581	0	Protected
SARS-CoV-2	569	574	IADTTD	5	D614G BR2 - WT SEP	1	0.0149972	0.00454217	-0.834742	0.0612318	-0.796669	0.0612318	-0.159334	0.0122464	Not corrected	0.00445448	0	Protected
SARS-CoV-2	692	696	YTMSL	4	D614G BR2 - WT SEP	1	-0.0201028	0.00466244	-0.744187	0.0451309	-0.705573	0.0451309	-0.176393	0.0112827	Not corrected	0.00434458	0	Protected
SARS-CoV-2	780	793	AQVKQIYKTPPIKD	11	D614G BR2 - WT SEP	1	-0.0140077	0.00453014	-0.636031	0.086698	-1.26478	0.173396	-0.11498	0.0157633	Not corrected	0.00312602	0	Protected
SARS-CoV-2	944	952	KLQDVVNQN	8	D614G BR2 - WT SEP	1	-0.011829	0.00611673	-1.41612	0.144607	-1.44615	0.144607	-0.180769	0.0180759	Not corrected	0.00448594	0	Protected
SARS-CoV-2	959	967	LVKQLSSNF	8	D614G BR2 - WT SEP	1	-0.0101162	0.00454629	-0.737707	0.0601551	-1.44944	0.12031	-0.181179	0.0150388	Not corrected	0.00171217	0	Protected
SARS-CoV-2	960	967	VKQLSSNF	7	D614G BR2 - WT SEP	1	-0.0135363	0.0056203	-0.726146	0.0422139	-1.40186	0.0844279	-0.200265	0.0120611	Not corrected	0.000240841	0	Protected
SARS-CoV-2	968	974	GAISSVL	6	D614G BR2 - WT SEP	1	-0.0216387	0.00592901	-0.931556	0.107777	-0.894785	0.107777	-0.149131	0.0179628	Not corrected	0.00133707	0	Protected
SARS-CoV-2	979	987	SRLDPPEAE	6	D614G BR2 - WT SEP	1	-0.0080565	0.00498939	-0.532681	0.0428396	-0.991184	0.0856792	-0.165197	0.0142799	Not corrected	0.00108651	0	Protected
SARS-CoV-2	994	998	ITGRL	4	D614G BR2 - WT SEP	1	-0.0116718	0.00542406	-0.466279	0.0488048	-0.431608	0.0488048	-0.107902	0.0122012	Not corrected	0.00173887	0	Protected
SARS-CoV-2	1088	1100	REGVFVSNGTHWF	12	D614G BR2 - WT SEP	1	-0.0265302	0.0082565	-0.371215	0.0220077	-0.760507	0.0440154	-0.0633756	0.00366795	Not corrected	0.000186146	0	Protected
SARS-CoV-2	1143	1149	DSFKEEL	6	D614G BR2 - WT SEP	1	-0.0107713	0.00387817	-1.08733	0.0382255	-1.06999	0.0382255	-0.178332	0.00637092	Not corrected	3.76986e-05	0	Protected
SARS-CoV-2	1221	1225	GSGYI	4	D614G BR2 - WT SEP	1	-0.0135338	0.00527299	-0.76065	0.0785818	-0.755568	0.0785818	-0.188892	0.0196455	Not corrected	0.00621634	0	Protected
SARS-CoV-2	243	264	ALHRSYLTPGDSSSGWTAGAAA	20	D614G BR2 - WT SEP	1	-0.0164115	0.0065499	0.139584	0.010089	0.427455	0.0302671	0.0213727	0.00151336	Not corrected	0.00128963	0	Deprotected
SARS-CoV-2	265	276	YYVGYLQPRTFL	10	D614G BR2 - WT SEP	1	-0.0459073	0.0063494	0.21223	0.0177546	0.494784	0.0355092	0.0494784	0.00355092	Not corrected	0.000309433	0	Deprotected
SARS-CoV-2	267	276	VGYLQPRTFL	8	D614G BR2 - WT SEP	1	-0.039945	0.00733221	0.135046	0.0357719	0.370118	0.0715439	0.0462648	0.00894299	Not corrected	0.00586681	0	Deprotected
SARS-CoV-2	306	318	FTVEKGIYQTSNF	12	D614G BR2 - WT SEP	1	-0.0275293	0.00518726	0.24109	0.00824951	0.564827	0.016499	0.0470689	0.00137492	Not corrected	3.43377e-05	0	Deprotected
SARS-CoV-2	314	318	QTSNF	4	D614G BR2 - WT SEP	1	-0.003301	0.0039225	0.395879	0.0521285	0.411432	0.0521285	0.102858	0.0130321	Not corrected	0.00551564	0	Deprotected
SARS-CoV-2	32	42	FTRGVYYPDKV	9	D614G BR2 - WT SEP	2	-0.021336	0.00215643	-0.140119	0.0235817	-0.246718	0.0471635	-0.0274131	0.00524039	Not corrected	0.00676685	0	Non significant
SARS-CoV-2	32	43	FTRGVYYPDKVF	10	D614G BR2 - WT SEP	2	-0.032052	0.00302732	-0.20735	0.0372709	-0.594825	0.111813	-0.0594825	0.0111813	Not corrected	0.0139122	0	Non significant
SARS-CoV-2	49	54	HSTQDL	5	D614G BR2 - WT SEP	2	0.010615	0.00395479	0.006219	0.0296691	0.0377328	0.0296691	0.00754656	0.00593381	Not corrected	0.150714	0	Non significant
SARS-CoV-2	49	55	HSTQDLF	6	D614G BR2 - WT SEP	2	-0.0260807	0.00195921	0.0167737	0.0202198	0.0251187	0.0202198	0.00418645	0.00336997	Not corrected	0.136026	0	Non significant
SARS-CoV-2	49	56	HSTQDLFL	7	D614G BR2 - WT SEP	2	-0.0362237	0.00320372	0.0922987	0.0400622	0.1437	0.0400622	0.0205286	0.00572317	Not corrected	0.00599761	0	Non significant
SARS-CoV-2	85	91	PFNDGVY	5	D614G BR2 - WT SEP	2	-0.0160647	0.00422176	-0.191041	0.0494446	-0.189171	0.0494446	-0.0378342	0.00988892	Not corrected	0.00496847	0	Non significant
SARS-CoV-2	92	103	FASTEKSNIIRG	11	D614G BR2 - WT SEP	2	-0.0179687	0.00225024	0.051116	0.0577711	0.1939	0.115542	0.0176273	0.0105038	Not corrected	0.122385	0	Non significant
SARS-CoV-2	92	106	FASTEKSNIIRGWIF	14	D614G BR2 - WT SEP	2	-0.061466	0.00828779	0.131654	0.0186938	0.344501	0.0560814	0.0246072	0.00400581	Not corrected	0.0014263	0	Non significant
SARS-CoV-2	93	103	ASTEKSNIIRG	10	D614G BR2 - WT SEP	2	-0.0185513	0.00210532	0.0161257	0.0384806	0.126711	0.0769612	0.0126711	0.00769612	Not corrected	0.097452	0	Non significant
SARS-CoV-2	94	103	STEKSNIIRG	9	D614G BR2 - WT SEP	2	-0.0160433	0.00198153	0.014383	0.0622749	0.0755318	0.12455	0.00839243	0.0138389	Not corrected	0.453406	0	Non significant
SARS-CoV-2	104	110	WIFGTTL	6	D614G BR2 - WT SEP	2	-0.0458257	0.00444084	0.035898	0.0534539	0.0679926	0.0534539	0.0113321	0.00890898	Not corrected	0.158393	0	Non significant
SARS-CoV-2	111	117	DSKTQSL	6	D614G BR2 - WT SEP	2	0.0133427	0.00465921	0.012214	0.0387631	0.035914	0.0387631	0.00598567	0.00646052	Not corrected	0.237968	0	Non significant
SARS-CoV-2	111	118	DSKTQSLL	7	D614G BR2 - WT SEP	2	-0.0222733	0.00111798	0.023347	0.0345753	0.11754	0.0691505	0.0167914	0.00987864	Not corrected	0.122409	0	Non significant
SARS-CoV-2	177	186	MDLEGKQGNF	9	D614G BR2 - WT SEP	2	-0.0190143	0.00141219	-0.0259547	0.0872284	0.0390842	0.174457	0.00434269	0.0193841	Not corrected	0.768289	0	Non significant
SARS-CoV-2	177	191	MDLEGKQGNFKNLRE	14	D614G BR2 - WT SEP	2	-0.017804	0.00304886	0.143208	0.0572999	0.547522	0.1719	0.0391087	0.0122786	Not corrected	0.0310645	0	Non significant
SARS-CoV-2	180	191	EGKQGNFKNLRE	11	D614G BR2 - WT SEP	2	-0.01275	0.00300537	0.0850523	0.0702806	0.20545	0.140561	0.0186773	0.0127783	Not corrected	0.15657	0	Non significant
SARS-CoV-2	192	199	FVFKNIDG	7	D614G BR2 - WT SEP	2	-0.0275857	0.00296189	0.0355193	0.0399883	0.0859789	0.0799766	0.0122827	0.0114252	Not corrected	0.240555	0	Non significant
SARS-CoV-2	192	200	FVFKNIDGY	8	D614G BR2 - WT SEP	2	-0.036564	0.00322282	0.0383217	0.0417823	0.114975	0.0835646	0.0143718	0.0104456	Not corrected	0.132889	0	Non significant
SARS-CoV-2	192	201	FVFKNIDGYF	9	D614G BR2 - WT SEP	2	-0.0405197	0.00534156	0.0123577	0.0291932	0.140149	0.0583864	0.0155721	0.00648738	Not corrected	0.0667215	0	Non significant
SARS-CoV-2	195	201	KNIDGYF	6	D614G BR2 - WT SEP	2	-0.0273867	0.00293744	0.0185173	0.0763001	0.0405401	0.0763001	0.00675668	0.0127167	Not corrected	0.502299	0	Non significant
SARS-CoV-2	200	212	YFKIYSKHTPINL	11	D614G BR2 - WT SEP	2	-0.0314817	0.00381563	0.0525317	0.023638	0.134209	0.0709139	0.0122008	0.00644672	Not corrected	0.0632021	0	Non significant
SARS-CoV-2	201	212	FKIYSKHTPINL	10	D614G BR2 - WT SEP	2	-0.0304037	0.00365978	0.040645	0.0268775	0.163197	0.0806325	0.0163197	0.00806325	Not corrected	0.0807055	0	Non significant
SARS-CoV-2	202	212	KIYSKHTPINL	9	D614G BR2 - WT SEP	2	-0.0329237	0.00317797	0.097874	0.037263	0.255047	0.074526	0.0283386	0.00828066	Not corrected	0.016199	0	Non significant
SARS-CoV-2	213	220	VRDLPQGF	6	D614G BR2 - WT SEP	2	-0.0264297	0.00158354	-0.0690457	0.0315659	-0.121921	0.0631317	-0.0203201	0.010522	Not corrected	0.0442953	0	Non significant
SARS-CoV-2	243	264	ALHRSYLTPGDSSSGWTAGAAA	20	D614G BR2 - WT SEP	2	-0.0231577	0.00234631	0.214501	0.175106	0.652207	0.525317	0.0326104	0.0262658	Not corrected	0.198537	0	Non significant
SARS-CoV-2	245	264	HRSYLTPGDSSSGWTAGAAA	18	D614G BR2 - WT SEP	2	-0.0237117	0.00320252	0.183028	0.183972	0.379033	0.367944	0.0210574	0.0204413	Not corrected	0.261679	0	Non significant
SARS-CoV-2	245	265	HRSYLTPGDSSSGWTAGAAAY	19	D614G BR2 - WT SEP	2	-0.02471	0.0029117	0.128256	0.150044	0.445609	0.450131	0.0234531	0.0236911	Not corrected	0.272755	0	Non significant
SARS-CoV-2	267	276	VGYLQPRTFL	8	D614G BR2 - WT SEP	2	-0.0426537	0.000841963	0.119123	0.0179483	0.338272	0.0358966	0.042284	0.00448708	Not corrected	0.00265611	0	Non significant
SARS-CoV-2	269	276	YLQPRTFL	6	D614G BR2 - WT SEP	2	-0.0328203	0.00293928	0.126217	0.0161596	0.304522	0.0323192	0.0507537	0.00538654	Not corrected	0.0036099	0	Non significant
SARS-CoV-2	291	303	CALDPLSETKCTL	11	D614G BR2 - WT SEP	2	-0.036266	0.00308928	-0.0240153	0.0481202	-0.00146557	0.0962404	-0.000133234	0.00874913	Not corrected	0.983094	0	Non significant
SARS-CoV-2	306	313	FTVEKGIY	7	D614G BR2 - WT SEP	2	-0.0246437	0.0024062	0.016025	0.0334966	0.0915797	0.0669931	0.0130828	0.00957044	Not corrected	0.146919	0	Non significant
SARS-CoV-2	310	318	KGIYQTSNF	8	D614G BR2 - WT SEP	2	-0.0223407	0.00371686	0.109651	0.0475136	0.308094	0.0950272	0.0385118	0.0118784	Not corrected	0.0131424	0	Non significant
SARS-CoV-2	369	374	YNSASF	5	D614G BR2 - WT SEP	2	-0.012535	0.00171559	-0.0266913	0.0977465	-5.1072e-05	0.0977465	-1.02144e-05	0.0195493	Not corrected	0.999438	0	Non significant
SARS-CoV-2	388	392	NDLCF	4	D614G BR2 - WT SEP	2	-0.0305097	0.00293701	-0.0912643	0.0393628	-0.0646804	0.0393628	-0.0161701	0.00984069	Not corrected	0.121476	0	Non significant
SARS-CoV-2	396	400	YADSF	4	D614G BR2 - WT SEP	2	-0.0134007	0.00228104	-0.0107633	0.0470245	0.00174176	0.0470245	0.00043544	0.0117561	Not corrected	0.960331	0	Non significant
SARS-CoV-2	400	406	FVIRGDE	6	D614G BR2 - WT SEP	2	-0.017129	0.0022116	0.0181833	0.0248478	0.0870259	0.0496955	0.0145043	0.00828259	Not corrected	0.0632803	0	Non significant
SARS-CoV-2	401	420	VIRGDEVRQIAPGQTGKIAD	18	D614G BR2 - WT SEP	2	-0.0176697	0.00270279	0.026043	0.0207283	0.185	0.0621848	0.0102778	0.00345471	Not corrected	0.0313337	0	Non significant
SARS-CoV-2	401	421	VIRGDEVRQIAPGQTGKIADY	19	D614G BR2 - WT SEP	2	-0.022808	0.00245975	-0.00660533	0.057534	-0.00230645	0.172602	-0.000121392	0.00908431	Not corrected	0.985805	0	Non significant
SARS-CoV-2	407	420	VRQIAPGQTGKIAD	12	D614G BR2 - WT SEP	2	-0.0156337	0.00367624	-0.0821823	0.0790475	-0.117649	0.158095	-0.00980412	0.0131746	Not corrected	0.379364	0	Non significant
SARS-CoV-2	407	422	VRQIAPGQTGKIADYN	14	D614G BR2 - WT SEP	2	-0.020369	0.00246312	-0.0387743	0.028844	-0.0856538	0.057688	-0.00611813	0.00412057	Not corrected	0.116736	0	Non significant
SARS-CoV-2	421	429	YNYKLPDDF	7	D614G BR2 - WT SEP	2	-0.0310407	0.00248166	-0.0904797	0.0198093	-0.127829	0.0396186	-0.0182613	0.0056598	Not corrected	0.0085398	0	Non significant
SARS-CoV-2	422	429	NYKLPDDF	6	D614G BR2 - WT SEP	2	-0.0276087	0.000878867	-0.0494633	0.0475182	-0.0686679	0.0950364	-0.0114446	0.0158394	Not corrected	0.390075	0	Non significant
SARS-CoV-2	423	429	YKLPDDF	5	D614G BR2 - WT SEP	2	-0.02782	0.00356076	-0.0562773	0.00975876	-0.0328571	0.0195175	-0.00657143	0.0039035	Not corrected	0.0651039	0	Non significant
SARS-CoV-2	442	452	DSKVGGNYNYL	10	D614G BR2 - WT SEP	2	-0.0211867	0.00242148	0.024043	0.0940034	0.079086	0.188007	0.0079086	0.0188007	Not corrected	0.592104	0	Non significant
SARS-CoV-2	444	452	KVGGNYNYL	8	D614G BR2 - WT SEP	2	-0.0264313	0.00300387	0.24597	0.0541928	0.53449	0.108386	0.0668113	0.0135482	Not corrected	0.0163941	0	Non significant
SARS-CoV-2	456	467	FRKSNLKPFERD	10	D614G BR2 - WT SEP	2	-0.0183277	0.00286364	0.0314347	0.0394025	0.108642	0.078805	0.0108642	0.0078805	Not corrected	0.165443	0	Non significant
SARS-CoV-2	456	470	FRKSNLKPFERDIST	13	D614G BR2 - WT SEP	2	-0.0270747	0.00410247	0.0687227	0.0250838	0.340907	0.100335	0.0262236	0.0077181	Not corrected	0.0317313	0	Non significant
SARS-CoV-2	456	471	FRKSNLKPFERDISTE	14	D614G BR2 - WT SEP	2	-0.0199492	0.00668778	0.0719672	0.0772812	0.277767	0.231843	0.0198405	0.0165602	Not corrected	0.410301	0	Non significant
SARS-CoV-2	497	505	FQPTNGVGY	7	D614G BR2 - WT SEP	2	-0.036489	0.00376459	-0.0567943	0.0418206	-0.0485872	0.0418206	-0.00694103	0.00597437	Not corrected	0.2134	0	Non significant
SARS-CoV-2	511	515	VVLSF	4	D614G BR2 - WT SEP	2	-0.037016	0.00328856	-0.0520617	0.0145085	0.0084334	0.0145085	0.00210835	0.00362713	Not corrected	0.451666	0	Non significant
SARS-CoV-2	542	552	NFNGLTGTGVL	10	D614G BR2 - WT SEP	2	-0.035604	0.00299475	0.012969	0.0230802	0.0194471	0.0230802	0.00194471	0.00230802	Not corrected	0.323308	0	Non significant
SARS-CoV-2	544	552	NGLTGTGVL	8	D614G BR2 - WT SEP	2	-0.0285947	0.00214152	-0.158947	0.0466069	-0.138705	0.0466069	-0.0173381	0.00582586	Not corrected	0.0113872	0	Non significant
SARS-CoV-2	569	574	IADTTD	5	D614G BR2 - WT SEP	2	0.0142193	0.00212342	-0.548906	0.147913	-0.510833	0.147913	-0.102167	0.0295827	Not corrected	0.0109189	0	Non significant
SARS-CoV-2	575	583	AVRDPQTLE	7	D614G BR2 - WT SEP	2	-0.0168457	0.00127711	0.0526817	0.0182989	0.188762	0.0365978	0.0269659	0.00522826	Not corrected	0.00542737	0	Non significant
SARS-CoV-2	576	582	VRDPQTL	5	D614G BR2 - WT SEP	2	-0.015112	0.00223701	0.1203	0.0467562	0.14953	0.0467562	0.0299059	0.00935125	Not corrected	0.0108908	0	Non significant
SARS-CoV-2	586	592	DITPCSF	5	D614G BR2 - WT SEP	2	-0.0275953	0.00257938	-0.583479	0.146001	-0.553172	0.146001	-0.110634	0.0292001	Not corrected	0.0275768	0	Non significant
SARS-CoV-2	627	633	DQLTPTW	5	D614G BR2 - WT SEP	2	-0.0239707	0.00256011	0.160865	0.104731	0.176548	0.104731	0.0353096	0.0209462	Not corrected	0.102819	0	Non significant
SARS-CoV-2	634	643	RVYSTGSNVF	9	D614G BR2 - WT SEP	2	-0.0241697	0.00228326	-0.0238143	0.0511421	-0.0288223	0.0511421	-0.00320247	0.00568245	Not corrected	0.448585	0	Non significant
SARS-CoV-2	664	682	IPIGAGICASYQTQTNSPA	16	D614G BR2 - WT SEP	2	-0.0332997	0.0020438	-0.0663493	0.0312561	-0.119207	0.0937683	-0.00745041	0.00586052	Not corrected	0.195786	0	Non significant
SARS-CoV-2	685	691	ASQSIIA	6	D614G BR2 - WT SEP	2	-0.0193813	0.00262694	-0.112052	0.0829545	-0.124512	0.0829545	-0.0207521	0.0138258	Not corrected	0.0886207	0	Non significant
SARS-CoV-2	688	692	SIIAY	4	D614G BR2 - WT SEP	2	-0.022468	0.00198247	-0.325837	0.0575735	-0.353462	0.0575735	-0.0883656	0.0143934	Not corrected	0.00452367	0	Non significant
SARS-CoV-2	716	720	TISVT	4	D614G BR2 - WT SEP	2	-0.014107	0.00115321	0.0375213	0.0165043	0.0515978	0.0165043	0.0128994	0.00412608	Not corrected	0.0330179	0	Non significant
SARS-CoV-2	721	727	TEILPVS	5	D614G BR2 - WT SEP	2	-0.0302527	0.00234413	-0.000142333	0.0326805	-0.026901	0.0326805	-0.0053802	0.00653609	Not corrected	0.334715	0	Non significant
SARS-CoV-2	721	728	TEILPVSM	6	D614G BR2 - WT SEP	2	-0.0386717	0.00242871	-0.071076	0.0256786	-0.0341537	0.0256786	-0.00569228	0.00427976	Not corrected	0.173112	0	Non significant
SARS-CoV-2	750	756	LLQYGSF	6	D614G BR2 - WT SEP	2	-0.0310917	0.00250685	-0.177803	0.0713626	-0.162539	0.0713626	-0.0270898	0.0118938	Not corrected	0.0684284	0	Non significant
SARS-CoV-2	751	756	LQYGSF	5	D614G BR2 - WT SEP	2	-0.0241673	0.00232995	-0.228479	0.0584766	-0.224139	0.0584766	-0.0448279	0.0116953	Not corrected	0.0172778	0	Non significant
SARS-CoV-2	761	768	NRALTGIA	7	D614G BR2 - WT SEP	2	-0.020162	0.00134365	-0.0820623	0.0156039	-0.0637074	0.0156039	-0.00910106	0.00222913	Not corrected	0.0146719	0	Non significant
SARS-CoV-2	767	779	IAVEQDKNTQEVF	12	D614G BR2 - WT SEP	2	-0.0276943	0.0016542	-0.04648	0.0153197	-0.0383357	0.0306395	-0.00319464	0.00255329	Not corrected	0.148193	0	Non significant
SARS-CoV-2	769	779	VEQDKNTQEVF	10	D614G BR2 - WT SEP	2	-0.0181537	0.00258361	0.0118817	0.0190909	0.0840112	0.0381817	0.00840112	0.00381817	Not corrected	0.0299509	0	Non significant
SARS-CoV-2	780	793	AQVKQIYKTPPIKD	11	D614G BR2 - WT SEP	2	-0.0194933	0.00134945	-0.332673	0.113271	-0.658068	0.226543	-0.0598244	0.0205948	Not corrected	0.029677	0	Non significant
SARS-CoV-2	815	819	IEDLL	4	D614G BR2 - WT SEP	2	-0.0339487	0.00206446	-0.0858823	0.0108492	-0.0351292	0.0108492	-0.0087823	0.00271229	Not corrected	0.0109835	0	Non significant
SARS-CoV-2	818	825	LLFNKVTL	7	D614G BR2 - WT SEP	2	-0.045296	0.00273455	0.0775917	0.013693	0.228569	0.027386	0.0326527	0.00391228	Not corrected	0.00263487	0	Non significant
SARS-CoV-2	819	825	LFNKVTL	6	D614G BR2 - WT SEP	2	-0.033817	0.00361225	0.120345	0.0535469	0.259003	0.107094	0.0431672	0.017849	Not corrected	0.0625509	0	Non significant
SARS-CoV-2	826	830	ADAGF	4	D614G BR2 - WT SEP	2	-0.0111073	0.00240615	0.12699	0.0353567	0.135187	0.0353567	0.0337969	0.00883916	Not corrected	0.00479586	0	Non significant
SARS-CoV-2	870	874	YTSAL	4	D614G BR2 - WT SEP	2	-0.0164433	0.00148711	-0.361265	0.0325626	-0.351032	0.0325626	-0.0877579	0.00814064	Not corrected	0.000693485	0	Non significant
SARS-CoV-2	899	903	MAYRF	4	D614G BR2 - WT SEP	2	-0.024531	0.00284644	-0.33976	0.061767	-0.307768	0.061767	-0.076942	0.0154418	Not corrected	0.00522271	0	Non significant
SARS-CoV-2	899	913	MAYRFNGIGVTQNVL	14	D614G BR2 - WT SEP	2	-0.0399503	0.0031109	-0.569762	0.109166	-1.06111	0.218333	-0.0757934	0.0155952	Not corrected	0.0135614	0	Non significant
SARS-CoV-2	900	910	AYRFNGIGVTQ	10	D614G BR2 - WT SEP	2	-0.0248943	0.00220948	-0.442436	0.0869486	-0.78512	0.173897	-0.078512	0.0173897	Not corrected	0.0101918	0	Non significant
SARS-CoV-2	914	919	YENQKL	5	D614G BR2 - WT SEP	2	-0.0118517	0.00444974	-0.175705	0.0250911	-0.302372	0.0501822	-0.0604744	0.0100364	Not corrected	0.00167592	0	Non significant
SARS-CoV-2	920	924	IANQF	4	D614G BR2 - WT SEP	2	-0.01375	0.00161725	-0.13112	0.0137459	-0.0999766	0.0137459	-0.0249942	0.00343648	Not corrected	0.000911836	0	Non significant
SARS-CoV-2	920	935	IANQFNSAIGKIQDSL	15	D614G BR2 - WT SEP	2	-0.0414433	0.0041888	0.144986	0.0224309	0.305719	0.0448617	0.0203813	0.00299078	Not corrected	0.00343209	0	Non significant
SARS-CoV-2	925	935	NSAIGKIQDSL	10	D614G BR2 - WT SEP	2	-0.0288507	0.00149768	0.0754523	0.0394059	0.186999	0.0788119	0.0186999	0.00788119	Not corrected	0.0261794	0	Non significant
SARS-CoV-2	928	935	IGKIQDSL	7	D614G BR2 - WT SEP	2	-0.0261133	0.00287628	0.127736	0.0465683	0.299519	0.0931366	0.0427885	0.0133052	Not corrected	0.0333371	0	Non significant
SARS-CoV-2	928	942	IGKIQDSLSSTASAL	14	D614G BR2 - WT SEP	2	-0.029553	0.00266552	0.0876963	0.0938892	0.174544	0.187778	0.0124674	0.0134127	Not corrected	0.291315	0	Non significant
SARS-CoV-2	936	942	SSTASAL	6	D614G BR2 - WT SEP	2	-0.00894367	0.00093402	-0.129489	0.0422055	-0.104525	0.0422055	-0.0174209	0.00703424	Not corrected	0.0215765	0	Non significant
SARS-CoV-2	954	958	QALNT	4	D614G BR2 - WT SEP	2	0.0111453	0.00461375	-0.316437	0.0907691	-0.312924	0.0907691	-0.0782311	0.0226923	Not corrected	0.00854034	0	Non significant
SARS-CoV-2	959	974	LVKQLSSNFGAISSVL	15	D614G BR2 - WT SEP	2	-0.0431437	0.00424953	-0.494507	0.23841	-0.980441	0.47682	-0.0653628	0.031788	Not corrected	0.0772195	0	Non significant
SARS-CoV-2	977	987	ILSRLDPPEAE	8	D614G BR2 - WT SEP	2	-0.022834	0.00218536	-0.343315	0.111705	-0.698122	0.22341	-0.0872652	0.0279263	Not corrected	0.0157228	0	Non significant
SARS-CoV-2	979	989	SRLDPPEAEVQ	8	D614G BR2 - WT SEP	2	-0.0174957	0.00104591	-0.570962	0.128773	-1.13231	0.257547	-0.141539	0.0321933	Not corrected	0.0163625	0	Non significant
SARS-CoV-2	988	998	VQIDRLITGRL	10	D614G BR2 - WT SEP	2	-0.0313217	0.00352525	-0.966875	0.249709	-1.91822	0.499417	-0.191822	0.0499417	Not corrected	0.0278198	0	Non significant
SARS-CoV-2	999	1003	QSLQT	4	D614G BR2 - WT SEP	2	0.0122793	0.00663774	-0.09574	0.0204539	-0.0324356	0.0204539	-0.00810891	0.00511349	Not corrected	0.0941817	0	Non significant
SARS-CoV-2	1004	1009	YVTQQL	5	D614G BR2 - WT SEP	2	-0.0157543	0.00188166	-0.0598823	0.0149401	-0.0161758	0.0149401	-0.00323517	0.00298802	Not corrected	0.181342	0	Non significant
SARS-CoV-2	1013	1017	AEIRA	4	D614G BR2 - WT SEP	2	0.004033	0.00297233	-0.278077	0.0282138	-0.241133	0.0282138	-0.0602833	0.00705344	Not corrected	0.00303152	0	Non significant
SARS-CoV-2	1015	1021	IRASANL	6	D614G BR2 - WT SEP	2	-0.0176133	0.00211939	-0.327595	0.028489	-0.335465	0.028489	-0.0559108	0.00474816	Not corrected	0.000260097	0	Non significant
SARS-CoV-2	1047	1059	MSFPQSAPHGVVF	10	D614G BR2 - WT SEP	2	-0.0386623	0.00321079	-0.004697	0.0126425	0.0316161	0.0252849	0.00316161	0.00252849	Not corrected	0.148161	0	Non significant
SARS-CoV-2	1087	1092	PREGVF	4	D614G BR2 - WT SEP	2	-0.021205	0.00247509	-0.036076	0.0164182	-0.00819901	0.0164182	-0.00204975	0.00410455	Not corrected	0.529915	0	Non significant
SARS-CoV-2	1088	1100	REGVFVSNGTHWF	12	D614G BR2 - WT SEP	2	-0.0306957	0.00458326	-0.332265	0.0825522	-0.682607	0.165104	-0.0568839	0.0137587	Not corrected	0.0124806	0	Non significant
SARS-CoV-2	1106	1114	FYEPQIITT	7	D614G BR2 - WT SEP	2	-0.030477	0.00178469	-0.349428	0.0655194	-0.357221	0.0655194	-0.0510316	0.00935992	Not corrected	0.0124695	0	Non significant
SARS-CoV-2	1243	1247	VLLST	4	D614G BR2 - WT SEP	2	-0.02199	0.00119875	0.0923267	0.0554301	0.100818	0.0554301	0.0252045	0.0138575	Not corrected	0.0780331	0	Non significant
SARS-CoV-2	1243	1248	VLLSTF	5	D614G BR2 - WT SEP	2	-0.038879	0.00278604	0.0367183	0.0917486	0.0560045	0.0917486	0.0112009	0.0183497	Not corrected	0.41327	0	Non significant
SARS-CoV-2	32	48	FTRGVYYPDKVFRSSVL	15	D614G BR2 - WT SEP	2	-0.0319427	0.00308125	-0.217834	0.0355822	-0.834736	0.142329	-0.055649	0.00948858	Not corrected	0.0010155	0	Protected
SARS-CoV-2	553	568	TESNKKFLPFQQFGRD	14	D614G BR2 - WT SEP	2	-0.0282783	0.00299296	-0.549661	0.0834497	-1.53707	0.250349	-0.109791	0.0178821	Not corrected	0.0038468	0	Protected
SARS-CoV-2	692	696	YTMSL	4	D614G BR2 - WT SEP	2	-0.02573	0.00272078	-0.648882	0.0902289	-0.610268	0.0902289	-0.152567	0.0225572	Not corrected	0.000723476	0	Protected
SARS-CoV-2	856	862	TVLPPLL	4	D614G BR2 - WT SEP	2	-0.047137	0.00395455	-0.70685	0.126236	-0.666714	0.126236	-0.166679	0.0315589	Not corrected	0.00343499	0	Protected
SARS-CoV-2	867	874	IAQYTSAL	7	D614G BR2 - WT SEP	2	-0.0201023	0.00202226	-0.550287	0.0864423	-0.544421	0.0864423	-0.0777745	0.0123489	Not corrected	0.00454143	0	Protected
SARS-CoV-2	875	882	LAGTITSG	7	D614G BR2 - WT SEP	2	-0.00673667	0.00242319	-2.22964	0.229226	-2.20487	0.229226	-0.314982	0.0327465	Not corrected	0.00144469	0	Protected
SARS-CoV-2	900	913	AYRFNGIGVTQNVL	13	D614G BR2 - WT SEP	2	-0.0344483	0.00305247	-0.567421	0.100079	-1.09637	0.200157	-0.084336	0.0153967	Not corrected	0.00418923	0	Protected
SARS-CoV-2	901	913	YRFNGIGVTQNVL	12	D614G BR2 - WT SEP	2	-0.0336687	0.0029667	-0.568777	0.0808602	-1.07156	0.16172	-0.0892964	0.0134767	Not corrected	0.00387292	0	Protected
SARS-CoV-2	904	913	NGIGVTQNVL	9	D614G BR2 - WT SEP	2	-0.0295577	0.00166765	-0.817682	0.170963	-0.806854	0.170963	-0.0896504	0.0189959	Not corrected	0.009024	0	Protected
SARS-CoV-2	906	913	IGVTQNVL	7	D614G BR2 - WT SEP	2	-0.029812	0.00318468	-0.860569	0.114771	-0.813919	0.114771	-0.116274	0.0163959	Not corrected	0.00704892	0	Protected
SARS-CoV-2	943	958	GKLQDVVNQNAQALNT	15	D614G BR2 - WT SEP	2	-0.015914	0.00332484	-0.417173	0.112889	-0.869542	0.225779	-0.0579695	0.0150519	Not corrected	0.00470911	0	Protected
SARS-CoV-2	944	952	KLQDVVNQN	8	D614G BR2 - WT SEP	2	-0.0198973	0.00224529	-1.10591	0.181491	-1.13594	0.181491	-0.141993	0.0226864	Not corrected	0.00133195	0	Protected
SARS-CoV-2	959	967	LVKQLSSNF	8	D614G BR2 - WT SEP	2	-0.0159917	0.00198933	-0.553196	0.106624	-1.08041	0.213248	-0.135052	0.026656	Not corrected	0.00216527	0	Protected
SARS-CoV-2	960	967	VKQLSSNF	7	D614G BR2 - WT SEP	2	-0.019061	0.00204876	-0.510334	0.0797571	-0.970233	0.159514	-0.138605	0.0227877	Not corrected	0.00518893	0	Protected
SARS-CoV-2	968	974	GAISSVL	6	D614G BR2 - WT SEP	2	-0.0291207	0.00241754	-0.495805	0.109085	-0.459034	0.109085	-0.0765057	0.0181808	Not corrected	0.00388502	0	Protected
SARS-CoV-2	979	987	SRLDPPEAE	6	D614G BR2 - WT SEP	2	-0.012374	0.00241017	-0.291349	0.0554404	-0.50852	0.110881	-0.0847533	0.0184801	Not corrected	0.00667365	0	Protected
SARS-CoV-2	988	993	VQIDRL	5	D614G BR2 - WT SEP	2	-0.0215917	0.00208283	-1.38462	0.190263	-1.33598	0.190263	-0.267196	0.0380527	Not corrected	0.00174167	0	Protected
SARS-CoV-2	990	998	IDRLITGRL	8	D614G BR2 - WT SEP	2	-0.031586	0.0029134	-0.694214	0.101418	-1.33868	0.202836	-0.167335	0.0253545	Not corrected	0.00751903	0	Protected
SARS-CoV-2	994	998	ITGRL	4	D614G BR2 - WT SEP	2	-0.016108	0.00179025	-0.597806	0.0560216	-0.563135	0.0560216	-0.140784	0.0140054	Not corrected	0.000131011	0	Protected
SARS-CoV-2	1100	1114	FVTQRNFYEPQIITT	13	D614G BR2 - WT SEP	2	-0.0352633	0.00282221	-0.270713	0.0355628	-0.520443	0.0711256	-0.0400341	0.0054712	Not corrected	0.000728862	0	Protected
SARS-CoV-2	1143	1149	DSFKEEL	6	D614G BR2 - WT SEP	2	-0.0182583	0.00151382	-0.801428	0.174497	-0.784093	0.174497	-0.130682	0.0290828	Not corrected	0.00259443	0	Protected
SARS-CoV-2	1221	1225	GSGYI	4	D614G BR2 - WT SEP	2	-0.019395	0.00105167	-0.684635	0.118736	-0.679553	0.118736	-0.169888	0.029684	Not corrected	0.001658	0	Protected
SARS-CoV-2	265	276	YYVGYLQPRTFL	10	D614G BR2 - WT SEP	2	-0.050061	0.003533	0.196809	0.024428	0.463942	0.0488561	0.0463942	0.00488561	Not corrected	0.000443558	0	Deprotected
SARS-CoV-2	266	276	YVGYLQPRTFL	9	D614G BR2 - WT SEP	2	-0.0462173	0.0036166	0.127676	0.0258961	0.410487	0.0517922	0.0456096	0.00575469	Not corrected	0.000608522	0	Deprotected
SARS-CoV-2	306	317	FTVEKGIYQTSN	11	D614G BR2 - WT SEP	2	-0.022478	0.00305663	0.162966	0.029597	0.373196	0.059194	0.0339269	0.00538127	Not corrected	0.00837182	0	Deprotected
SARS-CoV-2	306	318	FTVEKGIYQTSNF	12	D614G BR2 - WT SEP	2	-0.0309143	0.00280193	0.339456	0.0288821	0.761559	0.0577643	0.0634633	0.00481369	Not corrected	3.92392e-05	0	Deprotected
SARS-CoV-2	314	318	QTSNF	4	D614G BR2 - WT SEP	2	-0.006044	0.000356214	0.452216	0.0411012	0.46777	0.0411012	0.116943	0.0102753	Not corrected	9.98936e-05	0	Deprotected
SARS-CoV-2	318	325	FRVQPTES	6	D614G BR2 - WT SEP	2	-0.0136633	0.00241732	0.276438	0.0346683	0.621973	0.0693365	0.103662	0.0115561	Not corrected	0.000475428	0	Deprotected
SARS-CoV-2	820	829	FNKVTLADAG	9	D614G BR2 - WT SEP	2	-0.022914	0.00227178	0.272833	0.0433681	0.621791	0.0867362	0.0690879	0.00963735	Not corrected	0.00437951	0	Deprotected
SARS-CoV-2	820	830	FNKVTLADAGF	10	D614G BR2 - WT SEP	2	-0.0373573	0.00296569	0.217164	0.0245008	0.527021	0.0490017	0.0527021	0.00490017	Not corrected	0.00015033	0	Deprotected
SARS-CoV-2	821	830	NKVTLADAGF	9	D614G BR2 - WT SEP	2	-0.031643	0.00374494	0.268805	0.0439203	0.543038	0.0878407	0.0603376	0.00976008	Not corrected	0.00109743	0	Deprotected
SARS-CoV-2	925	947	NSAIGKIQDSLSSTASALGKLQD	22	D614G BR2 - WT SEP	2	-0.03903	0.00239663	0.325145	0.0572824	0.634071	0.114565	0.0288214	0.00520749	Not corrected	0.0039098	0	Deprotected
SARS-CoV-2	32	42	FTRGVYYPDKV	9	D614G BR2 - WT SEP	10	-0.0168703	0.00555844	-0.186476	0.0576527	-0.339432	0.115305	-0.0377146	0.0128117	Not corrected	0.0143645	0	Non significant
SARS-CoV-2	49	54	HSTQDL	5	D614G BR2 - WT SEP	10	-0.00721567	0.013554	0.079482	0.0525777	0.110996	0.0525777	0.0221992	0.0105155	Not corrected	0.0731996	0	Non significant
SARS-CoV-2	49	55	HSTQDLF	6	D614G BR2 - WT SEP	10	-0.022024	0.00533549	0.0568703	0.0412457	0.0652154	0.0412457	0.0108692	0.00687429	Not corrected	0.0826413	0	Non significant
SARS-CoV-2	49	56	HSTQDLFL	7	D614G BR2 - WT SEP	10	-0.032625	0.00610932	0.123982	0.0378567	0.175384	0.0378567	0.0250548	0.0054081	Not corrected	0.00291713	0	Non significant
SARS-CoV-2	85	91	PFNDGVY	5	D614G BR2 - WT SEP	10	-0.0133397	0.00413832	-0.196711	0.035178	-0.194841	0.035178	-0.0389682	0.0070356	Not corrected	0.0025438	0	Non significant
SARS-CoV-2	92	103	FASTEKSNIIRG	11	D614G BR2 - WT SEP	10	-0.0148847	0.00454671	0.105435	0.049485	0.302539	0.09897	0.0275035	0.00899728	Not corrected	0.0160361	0	Non significant
SARS-CoV-2	92	106	FASTEKSNIIRGWIF	14	D614G BR2 - WT SEP	10	-0.0459357	0.0128514	0.133806	0.0275011	0.350955	0.0825032	0.0250682	0.00589309	Not corrected	0.00590089	0	Non significant
SARS-CoV-2	93	103	ASTEKSNIIRG	10	D614G BR2 - WT SEP	10	-0.0150617	0.00565743	0.0715543	0.0508558	0.237568	0.101712	0.0237568	0.0101712	Not corrected	0.0249289	0	Non significant
SARS-CoV-2	94	103	STEKSNIIRG	9	D614G BR2 - WT SEP	10	-0.0132833	0.00423749	0.0789287	0.0436603	0.204623	0.0873207	0.0227359	0.0097023	Not corrected	0.0620265	0	Non significant
SARS-CoV-2	104	110	WIFGTTL	6	D614G BR2 - WT SEP	10	-0.0417333	0.00664717	0.0935093	0.0807264	0.125604	0.0807264	0.020934	0.0134544	Not corrected	0.112648	0	Non significant
SARS-CoV-2	111	117	DSKTQSL	6	D614G BR2 - WT SEP	10	-0.0115887	0.0209353	0.017577	0.0327815	0.041277	0.0327815	0.00687951	0.00546358	Not corrected	0.13414	0	Non significant
SARS-CoV-2	111	118	DSKTQSLL	7	D614G BR2 - WT SEP	10	-0.0188613	0.0051408	0.019536	0.0270953	0.109918	0.0541906	0.0157026	0.00774151	Not corrected	0.0799547	0	Non significant
SARS-CoV-2	177	186	MDLEGKQGNF	9	D614G BR2 - WT SEP	10	-0.015945	0.00421025	0.136901	0.124222	0.364795	0.248445	0.0405328	0.027605	Not corrected	0.0946151	0	Non significant
SARS-CoV-2	177	191	MDLEGKQGNFKNLRE	14	D614G BR2 - WT SEP	10	-0.0122693	0.00585087	0.200146	0.0586176	0.718337	0.175853	0.0513098	0.0125609	Not corrected	0.0136961	0	Non significant
SARS-CoV-2	180	191	EGKQGNFKNLRE	11	D614G BR2 - WT SEP	10	-0.021869	0.00968259	0.157559	0.0710721	0.350464	0.142144	0.0318604	0.0129222	Not corrected	0.0332956	0	Non significant
SARS-CoV-2	192	199	FVFKNIDG	7	D614G BR2 - WT SEP	10	-0.0239537	0.00613108	0.0842073	0.0493926	0.183355	0.0987851	0.0261936	0.0141122	Not corrected	0.0497935	0	Non significant
SARS-CoV-2	192	200	FVFKNIDGY	8	D614G BR2 - WT SEP	10	-0.0301293	0.00667845	0.0379307	0.030751	0.114193	0.061502	0.0142741	0.00768775	Not corrected	0.0563167	0	Non significant
SARS-CoV-2	192	201	FVFKNIDGYF	9	D614G BR2 - WT SEP	10	-0.036001	0.00742754	0.0541123	0.0338586	0.223658	0.0677172	0.0248509	0.00752414	Not corrected	0.0247892	0	Non significant
SARS-CoV-2	195	201	KNIDGYF	6	D614G BR2 - WT SEP	10	-0.0210047	0.00571223	0.0512177	0.114544	0.0732404	0.114544	0.0122067	0.0190906	Not corrected	0.393039	0	Non significant
SARS-CoV-2	200	212	YFKIYSKHTPINL	11	D614G BR2 - WT SEP	10	-0.0255307	0.00601494	0.068677	0.0348208	0.182645	0.104463	0.0166041	0.00949659	Not corrected	0.0608715	0	Non significant
SARS-CoV-2	201	212	FKIYSKHTPINL	10	D614G BR2 - WT SEP	10	-0.0247933	0.00622886	0.06554	0.0449907	0.237882	0.134972	0.0237882	0.0134972	Not corrected	0.0628909	0	Non significant
SARS-CoV-2	202	212	KIYSKHTPINL	9	D614G BR2 - WT SEP	10	-0.025349	0.00956621	0.073776	0.0454896	0.206851	0.0909792	0.0229835	0.0101088	Not corrected	0.0291503	0	Non significant
SARS-CoV-2	213	220	VRDLPQGF	6	D614G BR2 - WT SEP	10	-0.0219487	0.00645964	-0.0228467	0.0615975	-0.0295228	0.123195	-0.00492047	0.0205325	Not corrected	0.745832	0	Non significant
SARS-CoV-2	243	264	ALHRSYLTPGDSSSGWTAGAAA	20	D614G BR2 - WT SEP	10	-0.019794	0.00525302	0.389727	0.144364	1.17789	0.433092	0.0588943	0.0216546	Not corrected	0.0460648	0	Non significant
SARS-CoV-2	245	264	HRSYLTPGDSSSGWTAGAAA	18	D614G BR2 - WT SEP	10	-0.0204023	0.00565327	0.386476	0.218348	0.78593	0.436696	0.0436628	0.0242609	Not corrected	0.0554937	0	Non significant
SARS-CoV-2	245	265	HRSYLTPGDSSSGWTAGAAAY	19	D614G BR2 - WT SEP	10	-0.0212083	0.0055449	0.336336	0.125727	1.06985	0.37718	0.0563079	0.0198516	Not corrected	0.0340365	0	Non significant
SARS-CoV-2	265	276	YYVGYLQPRTFL	10	D614G BR2 - WT SEP	10	-0.0438283	0.00667618	0.0917297	0.0233473	0.253784	0.0466945	0.0253784	0.00466945	Not corrected	0.0119375	0	Non significant
SARS-CoV-2	266	276	YVGYLQPRTFL	9	D614G BR2 - WT SEP	10	-0.0408323	0.00718627	0.0627953	0.026302	0.280726	0.052604	0.0311918	0.00584489	Not corrected	0.00656312	0	Non significant
SARS-CoV-2	267	276	VGYLQPRTFL	8	D614G BR2 - WT SEP	10	-0.0414283	0.00648766	0.057951	0.0397872	0.215928	0.0795743	0.0269911	0.00994679	Not corrected	0.0506167	0	Non significant
SARS-CoV-2	269	276	YLQPRTFL	6	D614G BR2 - WT SEP	10	-0.0301997	0.00618646	0.079669	0.0282909	0.211426	0.0565818	0.0352377	0.00943031	Not corrected	0.0153245	0	Non significant
SARS-CoV-2	291	303	CALDPLSETKCTL	11	D614G BR2 - WT SEP	10	-0.03105	0.00548975	-0.0624877	0.0636032	-0.0784102	0.127206	-0.0071282	0.0115642	Not corrected	0.446596	0	Non significant
SARS-CoV-2	306	313	FTVEKGIY	7	D614G BR2 - WT SEP	10	-0.0198473	0.00454807	-0.136078	0.0599806	-0.212626	0.119961	-0.0303751	0.0171373	Not corrected	0.0757192	0	Non significant
SARS-CoV-2	306	317	FTVEKGIYQTSN	11	D614G BR2 - WT SEP	10	-0.01835	0.00493188	0.105811	0.0768918	0.258888	0.153784	0.0235353	0.0139803	Not corrected	0.103542	0	Non significant
SARS-CoV-2	306	318	FTVEKGIYQTSNF	12	D614G BR2 - WT SEP	10	-0.0259257	0.00570979	0.235177	0.0923807	0.553	0.184761	0.0460834	0.0153968	Not corrected	0.0265477	0	Non significant
SARS-CoV-2	310	318	KGIYQTSNF	8	D614G BR2 - WT SEP	10	-0.017695	0.0049002	0.118733	0.123451	0.32626	0.246901	0.0407825	0.0308627	Not corrected	0.155306	0	Non significant
SARS-CoV-2	314	318	QTSNF	4	D614G BR2 - WT SEP	10	-0.00711533	0.0046191	0.291588	0.0705847	0.307142	0.0705847	0.0767855	0.0176462	Not corrected	0.0101532	0	Non significant
SARS-CoV-2	318	325	FRVQPTES	6	D614G BR2 - WT SEP	10	-0.013519	0.00832336	0.284542	0.0739769	0.638181	0.147954	0.106363	0.024659	Not corrected	0.0200019	0	Non significant
SARS-CoV-2	369	374	YNSASF	5	D614G BR2 - WT SEP	10	-0.00944867	0.00374812	0.04069	0.142606	0.0673303	0.142606	0.0134661	0.0285212	Not corrected	0.524031	0	Non significant
SARS-CoV-2	388	392	NDLCF	4	D614G BR2 - WT SEP	10	-0.0252417	0.00610631	-0.183553	0.0665184	-0.156969	0.0665184	-0.0392422	0.0166296	Not corrected	0.0650505	0	Non significant
SARS-CoV-2	396	400	YADSF	4	D614G BR2 - WT SEP	10	-0.0111293	0.00474343	-0.0166483	0.028259	-0.00414324	0.028259	-0.00103581	0.00706475	Not corrected	0.845811	0	Non significant
SARS-CoV-2	400	406	FVIRGDE	6	D614G BR2 - WT SEP	10	-0.0144503	0.00449255	0.032556	0.0565278	0.115771	0.113056	0.0192952	0.0188426	Not corrected	0.217062	0	Non significant
SARS-CoV-2	401	420	VIRGDEVRQIAPGQTGKIAD	18	D614G BR2 - WT SEP	10	-0.0111957	0.00486267	0.112885	0.0894317	0.445527	0.268295	0.0247515	0.0149053	Not corrected	0.082612	0	Non significant
SARS-CoV-2	401	421	VIRGDEVRQIAPGQTGKIADY	19	D614G BR2 - WT SEP	10	-0.0177167	0.00571868	0.130334	0.100808	0.408511	0.302424	0.0215006	0.0159171	Not corrected	0.126691	0	Non significant
SARS-CoV-2	407	420	VRQIAPGQTGKIAD	12	D614G BR2 - WT SEP	10	-0.0216377	0.0069827	-0.0477353	0.0617697	-0.0487555	0.123539	-0.00406295	0.010295	Not corrected	0.589827	0	Non significant
SARS-CoV-2	407	422	VRQIAPGQTGKIADYN	14	D614G BR2 - WT SEP	10	-0.0149037	0.00471824	0.013796	0.0584849	0.0194869	0.11697	0.00139192	0.00835498	Not corrected	0.814993	0	Non significant
SARS-CoV-2	421	429	YNYKLPDDF	7	D614G BR2 - WT SEP	10	-0.0273127	0.00627085	-0.071004	0.0336935	-0.0888779	0.067387	-0.0126968	0.00962671	Not corrected	0.18296	0	Non significant
SARS-CoV-2	422	429	NYKLPDDF	6	D614G BR2 - WT SEP	10	-0.022626	0.00911242	-0.0261783	0.0473924	-0.0220979	0.0947848	-0.00368298	0.0157975	Not corrected	0.750857	0	Non significant
SARS-CoV-2	423	429	YKLPDDF	5	D614G BR2 - WT SEP	10	-0.023798	0.00598162	-0.027698	0.0247492	0.0243015	0.0494983	0.00486031	0.00989966	Not corrected	0.524582	0	Non significant
SARS-CoV-2	442	452	DSKVGGNYNYL	10	D614G BR2 - WT SEP	10	-0.016924	0.00466264	0.152794	0.114411	0.336587	0.228821	0.0336587	0.0228821	Not corrected	0.108724	0	Non significant
SARS-CoV-2	456	467	FRKSNLKPFERD	10	D614G BR2 - WT SEP	10	-0.014056	0.00635975	0.0673627	0.0408964	0.180498	0.0817928	0.0180498	0.00817928	Not corrected	0.0375629	0	Non significant
SARS-CoV-2	456	470	FRKSNLKPFERDIST	13	D614G BR2 - WT SEP	10	-0.018705	0.0091635	0.0658633	0.0475826	0.329469	0.19033	0.0253438	0.0146408	Not corrected	0.085623	0	Non significant
SARS-CoV-2	456	471	FRKSNLKPFERDISTE	14	D614G BR2 - WT SEP	10	-0.0197443	0.00246022	0.0715987	0.0325504	0.276661	0.0976511	0.0197615	0.00697508	Not corrected	0.0479708	0	Non significant
SARS-CoV-2	497	505	FQPTNGVGY	7	D614G BR2 - WT SEP	10	-0.033274	0.00859794	-0.0193487	0.0336076	-0.0111415	0.0336076	-0.00159165	0.00480109	Not corrected	0.646325	0	Non significant
SARS-CoV-2	511	515	VVLSF	4	D614G BR2 - WT SEP	10	-0.0333543	0.00582599	-0.057138	0.00753174	0.00335707	0.00753174	0.000839268	0.00188293	Not corrected	0.571537	0	Non significant
SARS-CoV-2	542	552	NFNGLTGTGVL	10	D614G BR2 - WT SEP	10	-0.0316117	0.00594134	0.0398273	0.0453748	0.0463054	0.0453748	0.00463054	0.00453748	Not corrected	0.238988	0	Non significant
SARS-CoV-2	544	552	NGLTGTGVL	8	D614G BR2 - WT SEP	10	-0.0240313	0.00481034	-0.068114	0.0486056	-0.0478717	0.0486056	-0.00598397	0.00607571	Not corrected	0.2246	0	Non significant
SARS-CoV-2	553	568	TESNKKFLPFQQFGRD	14	D614G BR2 - WT SEP	10	-0.0223603	0.00626118	-0.337796	0.0743797	-0.90148	0.223139	-0.0643914	0.0159385	Not corrected	0.0183214	0	Non significant
SARS-CoV-2	569	574	IADTTD	5	D614G BR2 - WT SEP	10	0.0116297	0.00346222	-0.15683	0.100818	-0.118757	0.100818	-0.0237514	0.0201636	Not corrected	0.17733	0	Non significant
SARS-CoV-2	575	583	AVRDPQTLE	7	D614G BR2 - WT SEP	10	-0.0140903	0.00643307	0.0742273	0.0227697	0.231853	0.0455394	0.0331218	0.00650564	Not corrected	0.00808186	0	Non significant
SARS-CoV-2	576	582	VRDPQTL	5	D614G BR2 - WT SEP	10	-0.016699	0.00477304	0.327569	0.0831358	0.356798	0.0831358	0.0713596	0.0166272	Not corrected	0.00690464	0	Non significant
SARS-CoV-2	627	633	DQLTPTW	5	D614G BR2 - WT SEP	10	-0.0227315	0.0057182	-0.278777	0.0637851	-0.263094	0.0637851	-0.0526188	0.012757	Not corrected	0.0224666	0	Non significant
SARS-CoV-2	634	643	RVYSTGSNVF	9	D614G BR2 - WT SEP	10	-0.0199947	0.00542233	-0.0304007	0.193271	-0.0354086	0.193271	-0.00393429	0.0214746	Not corrected	0.798739	0	Non significant
SARS-CoV-2	685	691	ASQSIIA	6	D614G BR2 - WT SEP	10	-0.0121663	0.00367403	-0.462755	0.114959	-0.475215	0.114959	-0.0792025	0.0191598	Not corrected	0.0193621	0	Non significant
SARS-CoV-2	716	720	TISVT	4	D614G BR2 - WT SEP	10	-0.016072	0.00390099	0.023473	0.0204294	0.0375494	0.0204294	0.00938736	0.00510735	Not corrected	0.0658642	0	Non significant
SARS-CoV-2	721	727	TEILPVS	5	D614G BR2 - WT SEP	10	-0.025297	0.00316723	0.0460557	0.0769259	0.019297	0.0769259	0.0038594	0.0153852	Not corrected	0.730154	0	Non significant
SARS-CoV-2	721	728	TEILPVSM	6	D614G BR2 - WT SEP	10	-0.0334997	0.00540361	-0.00416167	0.0480716	0.0327607	0.0480716	0.00546011	0.00801193	Not corrected	0.378503	0	Non significant
SARS-CoV-2	750	756	LLQYGSF	6	D614G BR2 - WT SEP	10	-0.0274283	0.00629729	-0.1476	0.0946038	-0.132337	0.0946038	-0.0220561	0.0157673	Not corrected	0.146702	0	Non significant
SARS-CoV-2	751	756	LQYGSF	5	D614G BR2 - WT SEP	10	-0.0195117	0.00501146	-0.266766	0.0491756	-0.262426	0.0491756	-0.0524852	0.00983511	Not corrected	0.00257144	0	Non significant
SARS-CoV-2	761	768	NRALTGIA	7	D614G BR2 - WT SEP	10	-0.0170193	0.00464785	0.0906647	0.0690054	0.10902	0.0690054	0.0155742	0.00985792	Not corrected	0.0954214	0	Non significant
SARS-CoV-2	767	779	IAVEQDKNTQEVF	12	D614G BR2 - WT SEP	10	-0.0226373	0.00551595	0.0337727	0.0384713	0.12217	0.0769426	0.0101808	0.00641188	Not corrected	0.126978	0	Non significant
SARS-CoV-2	769	779	VEQDKNTQEVF	10	D614G BR2 - WT SEP	10	-0.0140367	0.00567756	0.053794	0.0328026	0.167836	0.0656053	0.0167836	0.00656053	Not corrected	0.0233787	0	Non significant
SARS-CoV-2	780	793	AQVKQIYKTPPIKD	11	D614G BR2 - WT SEP	10	-0.0149853	0.00578454	-0.0692633	0.145586	-0.131248	0.291171	-0.0119317	0.0264701	Not corrected	0.548862	0	Non significant
SARS-CoV-2	815	819	IEDLL	4	D614G BR2 - WT SEP	10	-0.029821	0.00574352	-0.077739	0.0230552	-0.0269859	0.0230552	-0.00674647	0.00576379	Not corrected	0.161914	0	Non significant
SARS-CoV-2	818	825	LLFNKVTL	7	D614G BR2 - WT SEP	10	-0.0387213	0.00703768	0.081353	0.0657652	0.236091	0.13153	0.0337273	0.01879	Not corrected	0.0804161	0	Non significant
SARS-CoV-2	819	825	LFNKVTL	6	D614G BR2 - WT SEP	10	-0.030307	0.00577456	0.195899	0.0736076	0.410112	0.147215	0.068352	0.0245359	Not corrected	0.0361336	0	Non significant
SARS-CoV-2	820	829	FNKVTLADAG	9	D614G BR2 - WT SEP	10	-0.0187553	0.00444253	0.298262	0.129928	0.672649	0.259857	0.0747388	0.028873	Not corrected	0.0465372	0	Non significant
SARS-CoV-2	820	830	FNKVTLADAGF	10	D614G BR2 - WT SEP	10	-0.0339443	0.0054805	0.302364	0.145782	0.697421	0.291563	0.0697421	0.0291563	Not corrected	0.0617312	0	Non significant
SARS-CoV-2	821	830	NKVTLADAGF	9	D614G BR2 - WT SEP	10	-0.02513	0.00514666	0.361169	0.115753	0.727766	0.231506	0.0808629	0.0257229	Not corrected	0.0369291	0	Non significant
SARS-CoV-2	826	830	ADAGF	4	D614G BR2 - WT SEP	10	-0.00956867	0.00358288	0.138085	0.0839348	0.146282	0.0839348	0.0365705	0.0209837	Not corrected	0.118399	0	Non significant
SARS-CoV-2	899	913	MAYRFNGIGVTQNVL	14	D614G BR2 - WT SEP	10	-0.0351753	0.00684396	-1.12096	0.25448	-2.16349	0.50896	-0.154535	0.0363543	Not corrected	0.0229786	0	Non significant
SARS-CoV-2	914	919	YENQKL	5	D614G BR2 - WT SEP	10	-0.027312	0.0140061	-0.0555597	0.0311093	-0.0620811	0.0622185	-0.0124162	0.0124437	Not corrected	0.209233	0	Non significant
SARS-CoV-2	920	924	IANQF	4	D614G BR2 - WT SEP	10	-0.0118363	0.00383736	-0.290731	0.0803177	-0.259588	0.0803177	-0.0648969	0.0200794	Not corrected	0.0282808	0	Non significant
SARS-CoV-2	920	935	IANQFNSAIGKIQDSL	15	D614G BR2 - WT SEP	10	-0.0370467	0.00751768	0.210722	0.0777526	0.437191	0.155505	0.0291461	0.010367	Not corrected	0.0171482	0	Non significant
SARS-CoV-2	925	947	NSAIGKIQDSLSSTASALGKLQD	22	D614G BR2 - WT SEP	10	-0.0361103	0.00590139	0.453472	0.217292	0.890725	0.434584	0.0404875	0.0197538	Not corrected	0.0787128	0	Non significant
SARS-CoV-2	928	935	IGKIQDSL	7	D614G BR2 - WT SEP	10	-0.0251743	0.004925	0.312999	0.120496	0.670046	0.240992	0.0957209	0.0344274	Not corrected	0.0144637	0	Non significant
SARS-CoV-2	928	942	IGKIQDSLSSTASAL	14	D614G BR2 - WT SEP	10	-0.0260783	0.00361773	0.285292	0.182975	0.569736	0.36595	0.0406954	0.0261393	Not corrected	0.0959281	0	Non significant
SARS-CoV-2	936	942	SSTASAL	6	D614G BR2 - WT SEP	10	-0.0112303	0.00492661	-0.0461487	0.139716	-0.021185	0.139716	-0.00353084	0.023286	Not corrected	0.836212	0	Non significant
SARS-CoV-2	943	958	GKLQDVVNQNAQALNT	15	D614G BR2 - WT SEP	10	-0.0138883	0.00365946	-0.200027	0.106102	-0.435251	0.212203	-0.0290167	0.0141469	Not corrected	0.0798414	0	Non significant
SARS-CoV-2	944	952	KLQDVVNQN	8	D614G BR2 - WT SEP	10	-0.0181953	0.0055988	-0.306659	0.0962795	-0.336686	0.0962795	-0.0420858	0.0120349	Not corrected	0.0134995	0	Non significant
SARS-CoV-2	959	967	LVKQLSSNF	8	D614G BR2 - WT SEP	10	-0.0132697	0.00503501	-0.168516	0.0553421	-0.311053	0.110684	-0.0388816	0.0138355	Not corrected	0.0177045	0	Non significant
SARS-CoV-2	959	974	LVKQLSSNFGAISSVL	15	D614G BR2 - WT SEP	10	-0.041683	0.00636903	0.296109	0.103444	0.600791	0.206888	0.0400528	0.0137925	Not corrected	0.0474366	0	Non significant
SARS-CoV-2	960	967	VKQLSSNF	7	D614G BR2 - WT SEP	10	-0.0196303	0.00580479	-0.0989557	0.0502424	-0.147477	0.100485	-0.0210682	0.014355	Not corrected	0.0963467	0	Non significant
SARS-CoV-2	968	974	GAISSVL	6	D614G BR2 - WT SEP	10	-0.0265853	0.00413068	0.193648	0.148083	0.230419	0.148083	0.0384032	0.0246804	Not corrected	0.115475	0	Non significant
SARS-CoV-2	977	987	ILSRLDPPEAE	8	D614G BR2 - WT SEP	10	-0.0200947	0.00393571	0.102646	0.0544851	0.1938	0.10897	0.024225	0.0136213	Not corrected	0.0789875	0	Non significant
SARS-CoV-2	979	987	SRLDPPEAE	6	D614G BR2 - WT SEP	10	-0.015721	0.00529081	0.0938893	0.0456856	0.261956	0.0913713	0.0436594	0.0152285	Not corrected	0.0337843	0	Non significant
SARS-CoV-2	979	989	SRLDPPEAEVQ	8	D614G BR2 - WT SEP	10	-0.0145023	0.00371045	-0.0237957	0.0634324	-0.0379761	0.126865	-0.00474702	0.0158581	Not corrected	0.678175	0	Non significant
SARS-CoV-2	988	998	VQIDRLITGRL	10	D614G BR2 - WT SEP	10	-0.0247753	0.00772892	-1.208	0.330257	-2.40047	0.660514	-0.240047	0.0660514	Not corrected	0.0281702	0	Non significant
SARS-CoV-2	999	1003	QSLQT	4	D614G BR2 - WT SEP	10	-0.0238117	0.0271859	-0.205064	0.0121432	-0.14176	0.0121432	-0.0354399	0.00303579	Not corrected	0.000681764	0	Non significant
SARS-CoV-2	1004	1009	YVTQQL	5	D614G BR2 - WT SEP	10	-0.012458	0.00361974	-0.089926	0.0127095	-0.0462195	0.0127095	-0.0092439	0.0025419	Not corrected	0.0144305	0	Non significant
SARS-CoV-2	1047	1059	MSFPQSAPHGVVF	10	D614G BR2 - WT SEP	10	-0.0349953	0.00644877	-0.0281537	0.0179387	-0.0152972	0.0358773	-0.00152972	0.00358773	Not corrected	0.557685	0	Non significant
SARS-CoV-2	1087	1092	PREGVF	4	D614G BR2 - WT SEP	10	-0.017838	0.00557731	0.041514	0.0529922	0.069391	0.0529922	0.0173477	0.0132481	Not corrected	0.185225	0	Non significant
SARS-CoV-2	1100	1114	FVTQRNFYEPQIITT	13	D614G BR2 - WT SEP	10	-0.0296293	0.0061352	-0.170894	0.0245233	-0.320804	0.0490466	-0.0246772	0.00377282	Not corrected	0.00376735	0	Non significant
SARS-CoV-2	1106	1114	FYEPQIITT	7	D614G BR2 - WT SEP	10	-0.025868	0.00535079	-0.125699	0.0278409	-0.133492	0.0278409	-0.0190704	0.00397727	Not corrected	0.015312	0	Non significant
SARS-CoV-2	1143	1149	DSFKEEL	6	D614G BR2 - WT SEP	10	-0.0133307	0.00746154	-0.337382	0.209699	-0.320047	0.209699	-0.0533412	0.0349498	Not corrected	0.108288	0	Non significant
SARS-CoV-2	1221	1225	GSGYI	4	D614G BR2 - WT SEP	10	-0.0170943	0.00398717	-0.287443	0.0823643	-0.282361	0.0823643	-0.0705903	0.0205911	Not corrected	0.00964285	0	Non significant
SARS-CoV-2	1243	1247	VLLST	4	D614G BR2 - WT SEP	10	-0.019577	0.00330312	0.193413	0.0760414	0.201904	0.0760414	0.050476	0.0190103	Not corrected	0.0549348	0	Non significant
SARS-CoV-2	1243	1248	VLLSTF	5	D614G BR2 - WT SEP	10	-0.0337047	0.00584315	0.0857203	0.132648	0.105007	0.132648	0.0210013	0.0265295	Not corrected	0.315268	0	Non significant
SARS-CoV-2	32	43	FTRGVYYPDKVF	10	D614G BR2 - WT SEP	10	-0.0271663	0.00583169	-0.228155	0.0508733	-0.65724	0.15262	-0.065724	0.015262	Not corrected	0.00296494	0	Protected
SARS-CoV-2	32	48	FTRGVYYPDKVFRSSVL	15	D614G BR2 - WT SEP	10	-0.0253093	0.00646906	-0.23344	0.0349197	-0.897161	0.139679	-0.0598107	0.00931191	Not corrected	0.000679549	0	Protected
SARS-CoV-2	586	592	DITPCSF	5	D614G BR2 - WT SEP	10	-0.0236393	0.00600974	-0.645865	0.0862846	-0.615558	0.0862846	-0.123112	0.0172569	Not corrected	0.0018735	0	Protected
SARS-CoV-2	664	682	IPIGAGICASYQTQTNSPA	16	D614G BR2 - WT SEP	10	-0.027612	0.00558668	-0.175443	0.0356206	-0.446489	0.106862	-0.0279055	0.00667887	Not corrected	0.00363647	0	Protected
SARS-CoV-2	688	692	SIIAY	4	D614G BR2 - WT SEP	10	-0.016437	0.00430366	-1.06376	0.16159	-1.09139	0.16159	-0.272846	0.0403975	Not corrected	0.000545595	0	Protected
SARS-CoV-2	692	696	YTMSL	4	D614G BR2 - WT SEP	10	-0.021976	0.00460715	-0.44529	0.0641046	-0.406676	0.0641046	-0.101669	0.0160262	Not corrected	0.00294515	0	Protected
SARS-CoV-2	856	862	TVLPPLL	4	D614G BR2 - WT SEP	10	-0.0424643	0.00717211	-0.41888	0.0617289	-0.378744	0.0617289	-0.0946861	0.0154322	Not corrected	0.00514895	0	Protected
SARS-CoV-2	867	874	IAQYTSAL	7	D614G BR2 - WT SEP	10	-0.0159333	0.00426976	-1.36083	0.202295	-1.35497	0.202295	-0.193567	0.0288993	Not corrected	0.00314542	0	Protected
SARS-CoV-2	870	874	YTSAL	4	D614G BR2 - WT SEP	10	-0.014273	0.00383941	-0.700586	0.135051	-0.690353	0.135051	-0.172588	0.0337627	Not corrected	0.00227192	0	Protected
SARS-CoV-2	875	882	LAGTITSG	7	D614G BR2 - WT SEP	10	-0.00845567	0.00359888	-2.27941	0.175453	-2.25464	0.175453	-0.322092	0.0250648	Not corrected	4.67013e-05	0	Protected
SARS-CoV-2	899	903	MAYRF	4	D614G BR2 - WT SEP	10	-0.0187723	0.00541209	-0.922503	0.100309	-0.890511	0.100309	-0.222628	0.0250772	Not corrected	0.0036076	0	Protected
SARS-CoV-2	900	910	AYRFNGIGVTQ	10	D614G BR2 - WT SEP	10	-0.0190153	0.00415527	-0.810168	0.17497	-1.52058	0.34994	-0.152058	0.034994	Not corrected	0.00538296	0	Protected
SARS-CoV-2	900	913	AYRFNGIGVTQNVL	13	D614G BR2 - WT SEP	10	-0.0298263	0.00603016	-1.05926	0.166897	-2.08004	0.333793	-0.160003	0.0256764	Not corrected	0.00532203	0	Protected
SARS-CoV-2	901	913	YRFNGIGVTQNVL	12	D614G BR2 - WT SEP	10	-0.0284837	0.00606758	-1.07892	0.159504	-2.09184	0.319008	-0.17432	0.026584	Not corrected	0.00637498	0	Protected
SARS-CoV-2	904	913	NGIGVTQNVL	9	D614G BR2 - WT SEP	10	-0.0242057	0.00436081	-1.73752	0.19605	-1.7267	0.19605	-0.191855	0.0217834	Not corrected	0.000562004	0	Protected
SARS-CoV-2	906	913	IGVTQNVL	7	D614G BR2 - WT SEP	10	-0.0230023	0.0043523	-1.62411	0.130808	-1.57746	0.130808	-0.225351	0.0186868	Not corrected	0.000630015	0	Protected
SARS-CoV-2	954	958	QALNT	4	D614G BR2 - WT SEP	10	-0.012111	0.0166523	-0.405297	0.0692349	-0.401784	0.0692349	-0.100446	0.0173087	Not corrected	0.00272293	0	Protected
SARS-CoV-2	988	993	VQIDRL	5	D614G BR2 - WT SEP	10	-0.0173713	0.00499703	-1.21824	0.129395	-1.1696	0.129395	-0.23392	0.025879	Not corrected	0.000510429	0	Protected
SARS-CoV-2	990	998	IDRLITGRL	8	D614G BR2 - WT SEP	10	-0.0228223	0.00667328	-1.21806	0.152407	-2.38637	0.304814	-0.298296	0.0381018	Not corrected	0.00483502	0	Protected
SARS-CoV-2	994	998	ITGRL	4	D614G BR2 - WT SEP	10	-0.0175513	0.00622099	-1.0403	0.124043	-1.00563	0.124043	-0.251407	0.0310107	Not corrected	0.00273703	0	Protected
SARS-CoV-2	1013	1017	AEIRA	4	D614G BR2 - WT SEP	10	-0.0192243	0.0181678	-0.515427	0.0367261	-0.478483	0.0367261	-0.119621	0.00918154	Not corrected	0.00144968	0	Protected
SARS-CoV-2	1015	1021	IRASANL	6	D614G BR2 - WT SEP	10	-0.0155597	0.00485692	-0.743207	0.0828617	-0.751077	0.0828617	-0.125179	0.0138103	Not corrected	0.00133591	0	Protected
SARS-CoV-2	1088	1100	REGVFVSNGTHWF	12	D614G BR2 - WT SEP	10	-0.026369	0.0067093	-0.288764	0.0407838	-0.595605	0.0815676	-0.0496338	0.0067973	Not corrected	0.00736323	0	Protected
SARS-CoV-2	444	452	KVGGNYNYL	8	D614G BR2 - WT SEP	10	-0.0189467	0.00613929	0.383092	0.114696	0.808734	0.229392	0.101092	0.028674	Not corrected	0.00683313	0	Deprotected
SARS-CoV-2	925	935	NSAIGKIQDSL	10	D614G BR2 - WT SEP	10	-0.0274243	0.00420107	0.287355	0.0689798	0.610804	0.13796	0.0610804	0.013796	Not corrected	0.00636904	0	Deprotected
SARS-CoV-2	49	54	HSTQDL	5	D614G BR2 - WT SEP	30	-0.0147817	0.00769245	0.133116	0.0409158	0.16463	0.0409158	0.032926	0.00818315	Not corrected	0.0260324	0	Non significant
SARS-CoV-2	49	55	HSTQDLF	6	D614G BR2 - WT SEP	30	-0.0260833	0.00204242	0.172582	0.0600451	0.180927	0.0600451	0.0301545	0.0100075	Not corrected	0.0284865	0	Non significant
SARS-CoV-2	49	56	HSTQDLFL	7	D614G BR2 - WT SEP	30	-0.036284	0.00372884	0.127756	0.0189327	0.179157	0.0189327	0.0255939	0.00270467	Not corrected	0.00405357	0	Non significant
SARS-CoV-2	85	91	PFNDGVY	5	D614G BR2 - WT SEP	30	-0.0155297	0.00157622	-0.005991	0.0572129	-0.00412079	0.0572129	-0.000824158	0.0114426	Not corrected	0.919604	0	Non significant
SARS-CoV-2	92	103	FASTEKSNIIRG	11	D614G BR2 - WT SEP	30	-0.02175	0.00258768	0.07798	0.0186408	0.247628	0.0372815	0.0225117	0.00338923	Not corrected	0.00119647	0	Non significant
SARS-CoV-2	92	106	FASTEKSNIIRGWIF	14	D614G BR2 - WT SEP	30	-0.0493647	0.00375468	0.134607	0.0187371	0.35336	0.0562112	0.02524	0.00401509	Not corrected	0.00167593	0	Non significant
SARS-CoV-2	93	103	ASTEKSNIIRG	10	D614G BR2 - WT SEP	30	-0.021263	0.00314855	0.0663513	0.0404305	0.227162	0.0808609	0.0227162	0.00808609	Not corrected	0.013733	0	Non significant
SARS-CoV-2	94	103	STEKSNIIRG	9	D614G BR2 - WT SEP	30	-0.0200253	0.00308695	0.064949	0.0234893	0.176664	0.0469785	0.0196293	0.00521983	Not corrected	0.00486476	0	Non significant
SARS-CoV-2	104	110	WIFGTTL	6	D614G BR2 - WT SEP	30	-0.0432727	0.00298287	0.272892	0.0655348	0.304987	0.0655348	0.0508312	0.0109225	Not corrected	0.0028791	0	Non significant
SARS-CoV-2	111	117	DSKTQSL	6	D614G BR2 - WT SEP	30	-0.0169027	0.00809858	0.0708693	0.0458307	0.0945694	0.0458307	0.0157616	0.00763844	Not corrected	0.0893644	0	Non significant
SARS-CoV-2	111	118	DSKTQSLL	7	D614G BR2 - WT SEP	30	-0.0234233	0.00134093	0.0246073	0.0254293	0.120061	0.0508586	0.0171515	0.00726552	Not corrected	0.0410554	0	Non significant
SARS-CoV-2	177	186	MDLEGKQGNF	9	D614G BR2 - WT SEP	30	-0.0188393	0.00161835	0.0747	0.0233738	0.240394	0.0467477	0.0267104	0.00519418	Not corrected	0.00364168	0	Non significant
SARS-CoV-2	192	199	FVFKNIDG	7	D614G BR2 - WT SEP	30	-0.0272063	0.00239544	0.030041	0.0452795	0.0750223	0.0905591	0.0107175	0.012937	Not corrected	0.312473	0	Non significant
SARS-CoV-2	192	200	FVFKNIDGY	8	D614G BR2 - WT SEP	30	-0.033717	0.00255776	0.01024	0.0238714	0.0588114	0.0477429	0.00735142	0.00596786	Not corrected	0.144846	0	Non significant
SARS-CoV-2	192	201	FVFKNIDGYF	9	D614G BR2 - WT SEP	30	-0.0377183	0.00284296	0.0491883	0.0120833	0.21381	0.0241666	0.0237567	0.00268518	Not corrected	0.00372918	0	Non significant
SARS-CoV-2	195	201	KNIDGYF	6	D614G BR2 - WT SEP	30	-0.026247	0.0031574	0.102499	0.102921	0.124522	0.102921	0.0207537	0.0171534	Not corrected	0.165324	0	Non significant
SARS-CoV-2	200	212	YFKIYSKHTPINL	11	D614G BR2 - WT SEP	30	-0.0302317	0.00132708	0.055264	0.0106095	0.142406	0.0318286	0.012946	0.00289351	Not corrected	0.00256748	0	Non significant
SARS-CoV-2	201	212	FKIYSKHTPINL	10	D614G BR2 - WT SEP	30	-0.0291537	0.00140398	0.059896	0.0405869	0.22095	0.121761	0.022095	0.0121761	Not corrected	0.10306	0	Non significant
SARS-CoV-2	202	212	KIYSKHTPINL	9	D614G BR2 - WT SEP	30	-0.0320037	0.00328863	0.0521463	0.0108719	0.163592	0.0217437	0.0181769	0.00241597	Not corrected	0.00109129	0	Non significant
SARS-CoV-2	213	220	VRDLPQGF	6	D614G BR2 - WT SEP	30	-0.02598	0.00174486	-0.0339747	0.0205205	-0.0517788	0.0410409	-0.00862981	0.00684015	Not corrected	0.132024	0	Non significant
SARS-CoV-2	245	264	HRSYLTPGDSSSGWTAGAAA	18	D614G BR2 - WT SEP	30	-0.0233067	0.00127205	0.295083	0.123468	0.603144	0.246936	0.033508	0.0137187	Not corrected	0.0538328	0	Non significant
SARS-CoV-2	265	276	YYVGYLQPRTFL	10	D614G BR2 - WT SEP	30	-0.045328	0.00283261	0.0453213	0.0198742	0.160967	0.0397483	0.0160967	0.00397483	Not corrected	0.00919595	0	Non significant
SARS-CoV-2	266	276	YVGYLQPRTFL	9	D614G BR2 - WT SEP	30	-0.043595	0.00237995	0.00857167	0.0215047	0.172279	0.0430093	0.0191421	0.00477882	Not corrected	0.0133224	0	Non significant
SARS-CoV-2	267	276	VGYLQPRTFL	8	D614G BR2 - WT SEP	30	-0.0396193	0.00298485	-0.00201133	0.0299959	0.0960038	0.0599919	0.0120005	0.00749898	Not corrected	0.0769516	0	Non significant
SARS-CoV-2	269	276	YLQPRTFL	6	D614G BR2 - WT SEP	30	-0.0339367	0.00348697	0.0366667	0.0335535	0.125421	0.0671071	0.0209036	0.0111845	Not corrected	0.104739	0	Non significant
SARS-CoV-2	291	303	CALDPLSETKCTL	11	D614G BR2 - WT SEP	30	-0.0348163	0.00279842	-0.130816	0.0631627	-0.215066	0.126325	-0.0195515	0.0114841	Not corrected	0.102599	0	Non significant
SARS-CoV-2	306	317	FTVEKGIYQTSN	11	D614G BR2 - WT SEP	30	-0.02268	0.00220231	-0.188312	0.0566283	-0.329359	0.113257	-0.0299417	0.0102961	Not corrected	0.0333246	0	Non significant
SARS-CoV-2	306	318	FTVEKGIYQTSNF	12	D614G BR2 - WT SEP	30	-0.0279913	0.00226908	-0.13663	0.0344094	-0.190614	0.0688189	-0.0158845	0.0057349	Not corrected	0.0233299	0	Non significant
SARS-CoV-2	310	318	KGIYQTSNF	8	D614G BR2 - WT SEP	30	-0.021025	0.00232329	-0.201009	0.0445525	-0.313224	0.0891049	-0.039153	0.0111381	Not corrected	0.0280544	0	Non significant
SARS-CoV-2	314	318	QTSNF	4	D614G BR2 - WT SEP	30	-0.012669	0.00266991	0.0710327	0.0688515	0.0865864	0.0688515	0.0216466	0.0172129	Not corrected	0.182079	0	Non significant
SARS-CoV-2	318	325	FRVQPTES	6	D614G BR2 - WT SEP	30	-0.0179887	0.00248639	0.130904	0.0232447	0.330906	0.0464893	0.055151	0.00774822	Not corrected	0.00471924	0	Non significant
SARS-CoV-2	369	374	YNSASF	5	D614G BR2 - WT SEP	30	-0.0139997	0.00149843	0.0396563	0.0459059	0.0662966	0.0459059	0.0132593	0.00918118	Not corrected	0.127051	0	Non significant
SARS-CoV-2	388	392	NDLCF	4	D614G BR2 - WT SEP	30	-0.0287927	0.002137	-0.129112	0.0749287	-0.102528	0.0749287	-0.0256319	0.0187322	Not corrected	0.110637	0	Non significant
SARS-CoV-2	396	400	YADSF	4	D614G BR2 - WT SEP	30	-0.0147457	0.00241087	-0.0199247	0.0247062	-0.00741957	0.0247062	-0.00185489	0.00617655	Not corrected	0.676326	0	Non significant
SARS-CoV-2	400	406	FVIRGDE	6	D614G BR2 - WT SEP	30	-0.0182087	0.00208721	0.006997	0.0185174	0.0646532	0.0370347	0.0107755	0.00617245	Not corrected	0.0959462	0	Non significant
SARS-CoV-2	401	420	VIRGDEVRQIAPGQTGKIAD	18	D614G BR2 - WT SEP	30	-0.0189237	0.00291569	0.0575707	0.0578176	0.279583	0.173453	0.0155324	0.00963627	Not corrected	0.0815505	0	Non significant
SARS-CoV-2	401	421	VIRGDEVRQIAPGQTGKIADY	19	D614G BR2 - WT SEP	30	-0.021699	0.00213026	0.086428	0.0297219	0.276794	0.0891657	0.0145681	0.00469293	Not corrected	0.0224089	0	Non significant
SARS-CoV-2	407	420	VRQIAPGQTGKIAD	12	D614G BR2 - WT SEP	30	-0.0296277	0.00533109	-0.0855183	0.0712239	-0.124321	0.142448	-0.0103601	0.0118707	Not corrected	0.276942	0	Non significant
SARS-CoV-2	407	422	VRQIAPGQTGKIADYN	14	D614G BR2 - WT SEP	30	-0.019858	0.00143249	-0.0594607	0.016965	-0.127026	0.03393	-0.00907332	0.00242357	Not corrected	0.0149179	0	Non significant
SARS-CoV-2	421	429	YNYKLPDDF	7	D614G BR2 - WT SEP	30	-0.0316013	0.00264451	-0.105808	0.0229182	-0.158487	0.0458363	-0.0226409	0.00654805	Not corrected	0.0272072	0	Non significant
SARS-CoV-2	422	429	NYKLPDDF	6	D614G BR2 - WT SEP	30	-0.0260067	0.00241869	-0.049487	0.012674	-0.0687152	0.025348	-0.0114525	0.00422467	Not corrected	0.0185236	0	Non significant
SARS-CoV-2	423	429	YKLPDDF	5	D614G BR2 - WT SEP	30	-0.0276187	0.00367815	-0.0426933	0.0273783	-0.00568913	0.0547565	-0.00113783	0.0109513	Not corrected	0.889757	0	Non significant
SARS-CoV-2	442	452	DSKVGGNYNYL	10	D614G BR2 - WT SEP	30	-0.0199223	0.00173573	0.12146	0.0335805	0.273919	0.067161	0.0273919	0.0067161	Not corrected	0.00363039	0	Non significant
SARS-CoV-2	456	467	FRKSNLKPFERD	10	D614G BR2 - WT SEP	30	-0.0197897	0.00332439	0.089207	0.0207267	0.224186	0.0414533	0.0224186	0.00414533	Not corrected	0.0120463	0	Non significant
SARS-CoV-2	456	470	FRKSNLKPFERDIST	13	D614G BR2 - WT SEP	30	-0.025102	0.00218543	0.0589673	0.0241838	0.301885	0.0967353	0.023222	0.00744118	Not corrected	0.0280239	0	Non significant
SARS-CoV-2	456	471	FRKSNLKPFERDISTE	14	D614G BR2 - WT SEP	30	-0.018838	0.00414753	0.077852	0.0622304	0.295421	0.186691	0.0211015	0.0133351	Not corrected	0.0917046	0	Non significant
SARS-CoV-2	497	505	FQPTNGVGY	7	D614G BR2 - WT SEP	30	-0.037384	0.00259534	0.10381	0.0956064	0.112017	0.0956064	0.0160024	0.0136581	Not corrected	0.202945	0	Non significant
SARS-CoV-2	511	515	VVLSF	4	D614G BR2 - WT SEP	30	-0.0355623	0.00175182	-0.00198067	0.0279685	0.0585144	0.0279685	0.0146286	0.00699213	Not corrected	0.0407714	0	Non significant
SARS-CoV-2	542	552	NFNGLTGTGVL	10	D614G BR2 - WT SEP	30	-0.0340023	0.00240881	-0.041559	0.0477224	-0.0350809	0.0477224	-0.00350809	0.00477224	Not corrected	0.371448	0	Non significant
SARS-CoV-2	544	552	NGLTGTGVL	8	D614G BR2 - WT SEP	30	-0.027909	0.00194013	-0.0755837	0.0214979	-0.0553414	0.0214979	-0.00691767	0.00268724	Not corrected	0.023605	0	Non significant
SARS-CoV-2	569	574	IADTTD	5	D614G BR2 - WT SEP	30	0.010115	0.00365996	-0.0266487	0.047397	0.0114242	0.047397	0.00228483	0.0094794	Not corrected	0.7504	0	Non significant
SARS-CoV-2	575	583	AVRDPQTLE	7	D614G BR2 - WT SEP	30	-0.0195663	0.00358639	-0.0382527	0.0456453	0.0068929	0.0912906	0.000984699	0.0130415	Not corrected	0.918465	0	Non significant
SARS-CoV-2	576	582	VRDPQTL	5	D614G BR2 - WT SEP	30	-0.0254507	0.00331547	0.243383	0.0455048	0.272613	0.0455048	0.0545225	0.00910097	Not corrected	0.00187976	0	Non significant
SARS-CoV-2	586	592	DITPCSF	5	D614G BR2 - WT SEP	30	-0.0276177	0.00260515	-0.541282	0.109779	-0.510975	0.109779	-0.102195	0.0219558	Not corrected	0.0147243	0	Non significant
SARS-CoV-2	627	633	DQLTPTW	5	D614G BR2 - WT SEP	30	-0.0258357	0.00234538	-0.292875	0.0648174	-0.277192	0.0648174	-0.0554385	0.0129635	Not corrected	0.00359515	0	Non significant
SARS-CoV-2	634	643	RVYSTGSNVF	9	D614G BR2 - WT SEP	30	-0.0248607	0.00231839	-0.085725	0.0707919	-0.0907329	0.0707919	-0.0100814	0.00786576	Not corrected	0.128159	0	Non significant
SARS-CoV-2	692	696	YTMSL	4	D614G BR2 - WT SEP	30	-0.0244813	0.00202079	-0.360231	0.0546055	-0.321617	0.0546055	-0.0804043	0.0136514	Not corrected	0.00112969	0	Non significant
SARS-CoV-2	716	720	TISVT	4	D614G BR2 - WT SEP	30	-0.0221763	0.00206804	0.012536	0.0224642	0.0266124	0.0224642	0.00665311	0.00561605	Not corrected	0.177208	0	Non significant
SARS-CoV-2	721	727	TEILPVS	5	D614G BR2 - WT SEP	30	-0.028395	0.00209836	0.0147547	0.0796652	-0.012004	0.0796652	-0.0024008	0.015933	Not corrected	0.841844	0	Non significant
SARS-CoV-2	721	728	TEILPVSM	6	D614G BR2 - WT SEP	30	-0.036895	0.00250086	-0.001055	0.0330084	0.0358673	0.0330084	0.00597789	0.0055014	Not corrected	0.178923	0	Non significant
SARS-CoV-2	750	756	LLQYGSF	6	D614G BR2 - WT SEP	30	-0.030206	0.00261341	-0.056858	0.0419979	-0.0415942	0.0419979	-0.00693237	0.00699965	Not corrected	0.226624	0	Non significant
SARS-CoV-2	751	756	LQYGSF	5	D614G BR2 - WT SEP	30	-0.0239347	0.00172116	-0.162208	0.0453272	-0.157869	0.0453272	-0.0315738	0.00906543	Not corrected	0.0192957	0	Non significant
SARS-CoV-2	761	768	NRALTGIA	7	D614G BR2 - WT SEP	30	-0.0225243	0.00210979	0.273506	0.021026	0.291861	0.021026	0.0416944	0.00300372	Not corrected	0.00156096	0	Non significant
SARS-CoV-2	767	779	IAVEQDKNTQEVF	12	D614G BR2 - WT SEP	30	-0.0266263	0.00206135	-0.039946	0.0146676	-0.0252677	0.0293352	-0.00210564	0.0024446	Not corrected	0.309919	0	Non significant
SARS-CoV-2	769	779	VEQDKNTQEVF	10	D614G BR2 - WT SEP	30	-0.019159	0.0021936	-0.0135663	0.0226003	0.0331152	0.0452006	0.00331152	0.00452006	Not corrected	0.349286	0	Non significant
SARS-CoV-2	780	793	AQVKQIYKTPPIKD	11	D614G BR2 - WT SEP	30	-0.0219237	0.00181525	0.0472987	0.0737898	0.101876	0.14758	0.00926142	0.0134163	Not corrected	0.379291	0	Non significant
SARS-CoV-2	815	819	IEDLL	4	D614G BR2 - WT SEP	30	-0.03279	0.00179788	-0.0859517	0.0229153	-0.0351985	0.0229153	-0.00879963	0.00572882	Not corrected	0.0855291	0	Non significant
SARS-CoV-2	818	825	LLFNKVTL	7	D614G BR2 - WT SEP	30	-0.0418873	0.0034806	0.115029	0.00672727	0.303443	0.0134545	0.043349	0.00192208	Not corrected	5.18124e-06	0	Non significant
SARS-CoV-2	819	825	LFNKVTL	6	D614G BR2 - WT SEP	30	-0.034584	0.00222059	0.146556	0.0459076	0.311425	0.0918152	0.0519041	0.0153025	Not corrected	0.00704489	0	Non significant
SARS-CoV-2	826	830	ADAGF	4	D614G BR2 - WT SEP	30	-0.0149607	0.00190833	0.129842	0.0239616	0.138039	0.0239616	0.0345098	0.0059904	Not corrected	0.00102812	0	Non significant
SARS-CoV-2	856	862	TVLPPLL	4	D614G BR2 - WT SEP	30	-0.0452337	0.00305875	-0.35484	0.0481125	-0.314704	0.0481125	-0.0786759	0.0120281	Not corrected	0.000919327	0	Non significant
SARS-CoV-2	899	913	MAYRFNGIGVTQNVL	14	D614G BR2 - WT SEP	30	-0.0373403	0.00341686	-1.47761	0.265343	-2.87681	0.530686	-0.205486	0.0379061	Not corrected	0.0144291	0	Non significant
SARS-CoV-2	914	919	YENQKL	5	D614G BR2 - WT SEP	30	-0.04145	0.00956344	-0.0524427	0.0155448	-0.0558471	0.0310896	-0.0111694	0.00621792	Not corrected	0.0556912	0	Non significant
SARS-CoV-2	920	935	IANQFNSAIGKIQDSL	15	D614G BR2 - WT SEP	30	-0.038937	0.00315747	0.065645	0.0399877	0.147036	0.0799755	0.00980243	0.0053317	Not corrected	0.0835402	0	Non significant
SARS-CoV-2	925	935	NSAIGKIQDSL	10	D614G BR2 - WT SEP	30	-0.0284627	0.000830633	0.131921	0.0426628	0.299936	0.0853255	0.0299936	0.00853255	Not corrected	0.0243826	0	Non significant
SARS-CoV-2	928	942	IGKIQDSLSSTASAL	14	D614G BR2 - WT SEP	30	-0.0283457	0.00222504	0.114682	0.0495436	0.228516	0.0990872	0.0163226	0.00707766	Not corrected	0.0287231	0	Non significant
SARS-CoV-2	936	942	SSTASAL	6	D614G BR2 - WT SEP	30	-0.0174277	0.00354653	-0.149362	0.0954865	-0.124399	0.0954865	-0.0207331	0.0159144	Not corrected	0.162583	0	Non significant
SARS-CoV-2	943	958	GKLQDVVNQNAQALNT	15	D614G BR2 - WT SEP	30	-0.0193333	0.00230514	0.0837497	0.0389714	0.132302	0.0779427	0.00882015	0.00519618	Not corrected	0.0996809	0	Non significant
SARS-CoV-2	944	952	KLQDVVNQN	8	D614G BR2 - WT SEP	30	-0.0216667	0.00217672	-0.0269023	0.0437684	-0.0569301	0.0437684	-0.00711626	0.00547105	Not corrected	0.146	0	Non significant
SARS-CoV-2	954	958	QALNT	4	D614G BR2 - WT SEP	30	-0.0203913	0.00764245	-0.203016	0.0483793	-0.199503	0.0483793	-0.0498757	0.0120948	Not corrected	0.0121051	0	Non significant
SARS-CoV-2	959	967	LVKQLSSNF	8	D614G BR2 - WT SEP	30	-0.0180097	0.00161534	-0.029527	0.0265694	-0.0330757	0.0531388	-0.00413446	0.00664235	Not corrected	0.431274	0	Non significant
SARS-CoV-2	960	967	VKQLSSNF	7	D614G BR2 - WT SEP	30	-0.022154	0.00191919	0.0330407	0.0725519	0.116515	0.145104	0.016645	0.0207291	Not corrected	0.297656	0	Non significant
SARS-CoV-2	968	974	GAISSVL	6	D614G BR2 - WT SEP	30	-0.0303093	0.00163587	0.249934	0.0211308	0.286705	0.0211308	0.0477841	0.0035218	Not corrected	0.000849128	0	Non significant
SARS-CoV-2	977	987	ILSRLDPPEAE	8	D614G BR2 - WT SEP	30	-0.0241827	0.00137341	0.146142	0.0375963	0.280792	0.0751925	0.035099	0.00939906	Not corrected	0.00630184	0	Non significant
SARS-CoV-2	979	987	SRLDPPEAE	6	D614G BR2 - WT SEP	30	-0.0235107	0.0047448	0.120445	0.00927511	0.315067	0.0185502	0.0525111	0.0030917	Not corrected	1.9008e-05	0	Non significant
SARS-CoV-2	979	989	SRLDPPEAEVQ	8	D614G BR2 - WT SEP	30	-0.020274	0.00199199	0.117527	0.0271287	0.24467	0.0542575	0.0305837	0.00678218	Not corrected	0.00474274	0	Non significant
SARS-CoV-2	988	998	VQIDRLITGRL	10	D614G BR2 - WT SEP	30	-0.0290077	0.00279136	-1.16985	0.268199	-2.32417	0.536398	-0.232417	0.0536398	Not corrected	0.0196211	0	Non significant
SARS-CoV-2	999	1003	QSLQT	4	D614G BR2 - WT SEP	30	-0.035559	0.0155712	-0.324904	0.0609585	-0.261599	0.0609585	-0.0653998	0.0152396	Not corrected	0.0178044	0	Non significant
SARS-CoV-2	1004	1009	YVTQQL	5	D614G BR2 - WT SEP	30	-0.0166567	0.00148928	-0.150444	0.020748	-0.106737	0.020748	-0.0213474	0.0041496	Not corrected	0.00376922	0	Non significant
SARS-CoV-2	1047	1059	MSFPQSAPHGVVF	10	D614G BR2 - WT SEP	30	-0.0378823	0.00329918	-0.034711	0.0167954	-0.0284119	0.0335909	-0.00284119	0.00335909	Not corrected	0.319987	0	Non significant
SARS-CoV-2	1087	1092	PREGVF	4	D614G BR2 - WT SEP	30	-0.0226197	0.00315464	0.00342967	0.0221393	0.0313067	0.0221393	0.00782666	0.00553483	Not corrected	0.140934	0	Non significant
SARS-CoV-2	1100	1114	FVTQRNFYEPQIITT	13	D614G BR2 - WT SEP	30	-0.033626	0.0029051	-0.137797	0.0323161	-0.254611	0.0646322	-0.0195855	0.00497171	Not corrected	0.0168807	0	Non significant
SARS-CoV-2	1106	1114	FYEPQIITT	7	D614G BR2 - WT SEP	30	-0.0307923	0.00317762	-0.0679537	0.0530135	-0.0757475	0.0530135	-0.0108211	0.00757335	Not corrected	0.152213	0	Non significant
SARS-CoV-2	1143	1149	DSFKEEL	6	D614G BR2 - WT SEP	30	-0.01866	0.00265105	-0.026008	0.0910307	-0.00867291	0.0910307	-0.00144548	0.0151718	Not corrected	0.895632	0	Non significant
SARS-CoV-2	1221	1225	GSGYI	4	D614G BR2 - WT SEP	30	-0.0208783	0.00196786	-0.0216083	0.0308784	-0.0165264	0.0308784	-0.00413159	0.00771959	Not corrected	0.467314	0	Non significant
SARS-CoV-2	1243	1247	VLLST	4	D614G BR2 - WT SEP	30	-0.0249163	0.000662882	0.157012	0.0221505	0.165504	0.0221505	0.0413759	0.00553763	Not corrected	0.000497613	0	Non significant
SARS-CoV-2	1243	1248	VLLSTF	5	D614G BR2 - WT SEP	30	-0.036858	0.001781	0.081612	0.0470991	0.100898	0.0470991	0.0201796	0.00941982	Not corrected	0.0325106	0	Non significant
SARS-CoV-2	32	42	FTRGVYYPDKV	9	D614G BR2 - WT SEP	30	-0.0205387	0.00178835	-0.235874	0.0346899	-0.438228	0.0693798	-0.0486921	0.00770886	Not corrected	0.000705674	0	Protected
SARS-CoV-2	32	43	FTRGVYYPDKVF	10	D614G BR2 - WT SEP	30	-0.0301923	0.00217641	-0.209952	0.0300547	-0.602629	0.0901642	-0.0602629	0.00901642	Not corrected	0.00135251	0	Protected
SARS-CoV-2	32	48	FTRGVYYPDKVFRSSVL	15	D614G BR2 - WT SEP	30	-0.0293603	0.00217029	-0.22133	0.0216898	-0.84872	0.0867592	-0.0565813	0.00578394	Not corrected	0.00341454	0	Protected
SARS-CoV-2	306	313	FTVEKGIY	7	D614G BR2 - WT SEP	30	-0.0227023	0.00223871	-0.311861	0.0525631	-0.564192	0.105126	-0.0805988	0.015018	Not corrected	0.00510525	0	Protected
SARS-CoV-2	553	568	TESNKKFLPFQQFGRD	14	D614G BR2 - WT SEP	30	-0.0266353	0.0023114	-0.211763	0.0221191	-0.523382	0.0663574	-0.0373844	0.00473981	Not corrected	0.00236833	0	Protected
SARS-CoV-2	664	682	IPIGAGICASYQTQTNSPA	16	D614G BR2 - WT SEP	30	-0.031641	0.00208193	-0.378479	0.0324408	-1.0556	0.0973223	-0.0659748	0.00608265	Not corrected	8.88491e-05	0	Protected
SARS-CoV-2	685	691	ASQSIIA	6	D614G BR2 - WT SEP	30	-0.017843	0.00170666	-0.865337	0.1338	-0.877797	0.1338	-0.1463	0.0223	Not corrected	0.000874913	0	Protected
SARS-CoV-2	688	692	SIIAY	4	D614G BR2 - WT SEP	30	-0.0171367	0.00214424	-1.52849	0.279422	-1.55612	0.279422	-0.389029	0.0698554	Not corrected	0.00114818	0	Protected
SARS-CoV-2	867	874	IAQYTSAL	7	D614G BR2 - WT SEP	30	-0.0181237	0.00179113	-2.01033	0.25107	-2.00447	0.25107	-0.286353	0.0358671	Not corrected	0.00431293	0	Protected
SARS-CoV-2	870	874	YTSAL	4	D614G BR2 - WT SEP	30	-0.0182623	0.00208969	-0.964665	0.0864267	-0.954432	0.0864267	-0.238608	0.0216067	Not corrected	0.000170231	0	Protected
SARS-CoV-2	899	903	MAYRF	4	D614G BR2 - WT SEP	30	-0.0232607	0.0023949	-1.33993	0.12301	-1.30794	0.12301	-0.326984	0.0307526	Not corrected	0.00292806	0	Protected
SARS-CoV-2	900	910	AYRFNGIGVTQ	10	D614G BR2 - WT SEP	30	-0.0239607	0.00251451	-1.23938	0.108222	-2.37901	0.216445	-0.237901	0.0216445	Not corrected	0.00052653	0	Protected
SARS-CoV-2	900	913	AYRFNGIGVTQNVL	13	D614G BR2 - WT SEP	30	-0.032026	0.00278478	-1.45847	0.180743	-2.87847	0.361486	-0.221421	0.0278066	Not corrected	0.00353189	0	Protected
SARS-CoV-2	901	913	YRFNGIGVTQNVL	12	D614G BR2 - WT SEP	30	-0.0297337	0.00234193	-1.41671	0.197236	-2.76742	0.394472	-0.230619	0.0328727	Not corrected	0.00446039	0	Protected
SARS-CoV-2	904	913	NGIGVTQNVL	9	D614G BR2 - WT SEP	30	-0.0262117	0.00209113	-2.2591	0.240908	-2.24828	0.240908	-0.249808	0.0267675	Not corrected	0.000238411	0	Protected
SARS-CoV-2	906	913	IGVTQNVL	7	D614G BR2 - WT SEP	30	-0.0252577	0.00117674	-1.92665	0.2792	-1.88	0.2792	-0.268572	0.0398857	Not corrected	0.000990048	0	Protected
SARS-CoV-2	920	924	IANQF	4	D614G BR2 - WT SEP	30	-0.0161017	0.00208187	-0.467978	0.0654804	-0.436834	0.0654804	-0.109209	0.0163701	Not corrected	0.00433413	0	Protected
SARS-CoV-2	988	993	VQIDRL	5	D614G BR2 - WT SEP	30	-0.0223063	0.00228294	-0.919578	0.113176	-0.870937	0.113176	-0.174187	0.0226351	Not corrected	0.00625868	0	Protected
SARS-CoV-2	990	998	IDRLITGRL	8	D614G BR2 - WT SEP	30	-0.0264557	0.00268658	-1.32158	0.13386	-2.59341	0.26772	-0.324176	0.033465	Not corrected	0.00335916	0	Protected
SARS-CoV-2	994	998	ITGRL	4	D614G BR2 - WT SEP	30	-0.0244613	0.00451735	-1.1779	0.14518	-1.14323	0.14518	-0.285808	0.0362949	Not corrected	0.00637076	0	Protected
SARS-CoV-2	1013	1017	AEIRA	4	D614G BR2 - WT SEP	30	-0.029269	0.0186483	-0.564685	0.04659	-0.527741	0.04659	-0.131935	0.0116475	Not corrected	0.00248362	0	Protected
SARS-CoV-2	1015	1021	IRASANL	6	D614G BR2 - WT SEP	30	-0.0214867	0.00264717	-1.05406	0.100006	-1.06193	0.100006	-0.176989	0.0166676	Not corrected	0.00104847	0	Protected
SARS-CoV-2	1088	1100	REGVFVSNGTHWF	12	D614G BR2 - WT SEP	30	-0.0302877	0.00133754	-0.372012	0.0350639	-0.762102	0.0701277	-0.0635085	0.00584398	Not corrected	0.000715616	0	Protected
SARS-CoV-2	177	191	MDLEGKQGNFKNLRE	14	D614G BR2 - WT SEP	30	-0.0181523	0.00233042	0.165569	0.01367	0.614607	0.04101	0.0439005	0.00292928	Not corrected	2.7438e-05	0	Deprotected
SARS-CoV-2	180	191	EGKQGNFKNLRE	11	D614G BR2 - WT SEP	30	-0.034761	0.0105238	0.168399	0.0436495	0.372144	0.087299	0.0338313	0.00793627	Not corrected	0.00954482	0	Deprotected
SARS-CoV-2	243	264	ALHRSYLTPGDSSSGWTAGAAA	20	D614G BR2 - WT SEP	30	-0.0239203	0.00377963	0.275335	0.0303998	0.834708	0.0911993	0.0417354	0.00455996	Not corrected	0.000182471	0	Deprotected
SARS-CoV-2	245	265	HRSYLTPGDSSSGWTAGAAAY	19	D614G BR2 - WT SEP	30	-0.024894	0.0019574	0.226442	0.031219	0.740167	0.0936569	0.0389562	0.00492931	Not corrected	0.00181298	0	Deprotected
SARS-CoV-2	444	452	KVGGNYNYL	8	D614G BR2 - WT SEP	30	-0.0239873	0.0040984	0.282856	0.0480468	0.608262	0.0960937	0.0760327	0.0120117	Not corrected	0.00163855	0	Deprotected
SARS-CoV-2	820	829	FNKVTLADAG	9	D614G BR2 - WT SEP	30	-0.0235577	0.0011985	0.24102	0.0247585	0.558165	0.049517	0.0620183	0.00550189	Not corrected	0.00221515	0	Deprotected
SARS-CoV-2	820	830	FNKVTLADAGF	10	D614G BR2 - WT SEP	30	-0.036566	0.00306202	0.226331	0.0245051	0.545355	0.0490102	0.0545355	0.00490102	Not corrected	0.000150329	0	Deprotected
SARS-CoV-2	821	830	NKVTLADAGF	9	D614G BR2 - WT SEP	30	-0.030682	0.0024978	0.252856	0.0252295	0.511141	0.0504589	0.0567934	0.00560655	Not corrected	0.00344902	0	Deprotected
SARS-CoV-2	925	947	NSAIGKIQDSLSSTASALGKLQD	22	D614G BR2 - WT SEP	30	-0.0363547	0.00373679	0.267146	0.0500613	0.518073	0.100123	0.0235488	0.00455103	Not corrected	0.00278143	0	Deprotected
SARS-CoV-2	928	935	IGKIQDSL	7	D614G BR2 - WT SEP	30	-0.0272043	0.00239846	0.189387	0.063113	0.422821	0.126226	0.060403	0.0180323	Not corrected	0.00778162	0	Deprotected
SARS-CoV-2	959	974	LVKQLSSNFGAISSVL	15	D614G BR2 - WT SEP	30	-0.0451607	0.00266302	0.350732	0.0296279	0.710036	0.0592557	0.0473357	0.00395038	Not corrected	0.00270449	0	Deprotected
