# Supplementary material for: Timeline of changes in spike conformational dynamics in emergent SARS-CoV-2 variants reveal progressive stabilization of trimer stalk with altered NTD dynamics
Source: eLife. 2023 Mar 17;12:e82584. doi: 10.7554/eLife.82584 (PMC10049203; doi:10.7554/eLife.82584)
Supplement: Figure 4—source data 1. [file elife-82584-fig4-data1.xlsx]

## Sheet: Alpha_minus_D614G
				Alpha minus D614G (Da)
Plot Number	Sequence	Start	End	1 min	2 min	10 min	30 min
1	FTRGVYYPDKV	32	42	0.0556	0.1404	0.0301	0.1424
2	FTRGVYYPDKVF	32	43	-0.0971	-0.0145	-0.0821	-0.0284
3	FTRGVYYPDKVFRSSVL	32	48	-0.2866	-0.1419	-0.2276	-0.1738
4	HSTQDL	49	54	-0.0056	0.054	0.0225	0.0354
5	HSTQDLF	49	55	0.0336	0.0531	0.0386	-0.045
6	HSTQDLFL	49	56	-0.0636	-0.0906	-0.0974	-0.0581
7	FASTEKSNIIRG	92	103	0.5043	0.6115	0.556	0.5157
8	STEKSNIIRG	94	103	0.4547	0.6062	0.5712	0.5187
9	FASTEKSNIIRGWIF	92	106	0.2333	0.195	0.2083	0.037
10	WIFGTTL	104	110	0.0877	-0.0052	0.1078	-0.0979
11	DSKTQSL	111	117	0.0057	0.0418	-0.0021	-0.0157
12	DSKTQSLL	111	118	-0.0639	-0.0926	-0.1953	-0.0793
13	MDLEGKQGNF	177	186	0.3131	0.6636	0.2728	0.2441
14	MDLEGKQGNFKNLRE	177	191	0.4378	0.7443	0.7006	0.6278
15	EGKQGNFKNLRE	180	191	0.4886	0.7309	0.8135	0.6498
16	FVFKNIDG	192	199	-0.0456	-0.0082	-0.0496	-0.0654
17	FVFKNIDGY	192	200	0.0154	0.0071	-0.0172	-0.0184
18	FVFKNIDGYF	192	201	-0.1251	-0.0672	-0.1926	-0.2639
19	YFKIYSKHTPINL	200	212	0.3391	0.4442	0.0759	0.0772
20	FKIYSKHTPINL	201	212	0.5903	0.5458	0.2101	0.1102
21	KIYSKHTPINL	202	212	0.2613	0.3022	0.0564	0.0252
22	VRDLPQGF	213	220	0.3156	0.4331	0.2601	0.1811
23	ALHRSYLTPGDSSSGWTAGAAA	243	264	0.274	0.5305	-0.2987	-0.2145
24	HRSYLTPGDSSSGWTAGAAA	245	264	0.6446	0.8485	0.0914	0.149
25	HRSYLTPGDSSSGWTAGAAAY	245	265	0.5788	0.5833	-0.1532	-0.11
26	YYVGYLQPRTFL	265	276	-0.1182	-0.1024	-0.0244	-0.0944
27	YVGYLQPRTFL	266	276	-0.1199	-0.056	-0.1212	-0.1566
28	VGYLQPRTFL	267	276	-0.0096	-0.0057	-0.0829	-0.1199
29	YLQPRTFL	269	276	0.1024	0.0629	-0.006	-0.0431
30	CALDPLSETKCTL	291	303	0.2776	0.3703	0.0382	-0.3051
31	FTVEKGIY	306	313	-0.0178	0.0254	-0.0094	-0.0556
32	FTVEKGIYQTSN	306	317	0.0155	0.1223	-0.0874	-0.1045
33	FTVEKGIYQTSNF	306	318	-0.3692	-0.3695	-0.5543	-0.3679
34	KGIYQTSNF	310	318	-0.1706	-0.3395	-0.4845	-0.1689
35	QTSNF	314	318	-0.1355	-0.2323	-0.231	-0.0405
36	FRVQPTES	318	325	-0.1918	-0.162	-0.2723	-0.2228
37	YNSASF	369	374	0.1605	0.257	0.196	0.1927
38	NDLCF	388	392	0.1693	0.1473	0.1956	0.1814
39	YADSF	396	400	0.0307	0.0649	0.0487	0.0879
40	FVIRGDE	400	406	-0.1475	-0.1735	-0.1818	-0.0868
41	VIRGDEVRQIAPGQTGKIAD	401	420	-0.3147	-0.0843	-0.3584	-0.292
42	VIRGDEVRQIAPGQTGKIADY	401	421	-0.1112	0.1323	-0.2375	-0.1155
43	VRQIAPGQTGKIAD	407	420	0.0349	0.2119	0.1412	0.2372
44	VRQIAPGQTGKIADY	407	421	0.0531	0.2954	0.2245	0.0506
45	VRQIAPGQTGKIADYN	407	422	-0.0135	0.1332	0.0907	0.2102
46	YNYKLPDDF	421	429	0.0727	0.0616	0.1776	0.0923
47	NYKLPDDF	422	429	0.0908	0.0858	0.0107	0.0775
48	YKLPDDF	423	429	-0.0163	-0.0087	-0.0052	-0.0093
49	DSKVGGNYNYL	442	452	0.0651	0.3398	0.1954	0.1557
50	KVGGNYNYL	444	452	-0.1011	-0.0823	-0.2515	-0.2822
51	YRLFRKSNLKPFERD	453	467	-0.1382	-0.0353	-0.2369	-0.1513
52	FRKSNLKPFERD	456	467	-0.1576	-0.0735	-0.1821	-0.2881
53	FRKSNLKPFERDIST	456	470	-0.1669	-0.1316	-0.1488	-0.197
54	FRKSNLKPFERDISTE	456	471	-0.175	-0.2355	-0.3641	-0.343
55	VVLSF	511	515	-0.0008	-0.0051	0.0109	-0.0525
56	NFNGLTGTGVL	542	552	0.0558	0.1072	0.1246	0.0832
57	NGLTGTGVL	544	552	0.022	0.0769	0.018	0.0994
58	TESNKKFLPFQQF	553	565	0.0033	0.0907	-0.1113	-0.1885
59	TESNKKFLPFQQFGRD	553	568	-0.1624	-0.0553	-0.4047	-0.6399
60	AVRDPQTL	575	582	0.0751	-0.0326	-0.0711	-0.1118
61	AVRDPQTLE	575	583	0.0218	-0.05	-0.053	-0.0476
62	VRDPQTL	576	582	0.0002	-0.0361	-0.1192	-0.0929
63	DITPCSF	586	592	0.3812	0.4582	0.6061	0.5135
64	DQLTPTW	627	633	0.527	0.5718	0.4839	0.3381
65	RVYSTGSNVF	634	643	0.1736	0.3368	0.1155	0.1112
66	ASQSIIA	685	691	-0.1245	-0.0221	0.062	0.0354
67	SIIAY	688	692	-0.0421	0.0334	0.0763	0.1084
68	YTMSL	692	696	-0.0739	-0.0079	-0.1208	-0.1006
69	TISVT	716	720	-0.0324	-0.0345	-0.0281	-0.0074
70	TEILPVS	721	727	-0.0065	0.0054	-0.0091	0.0293
71	TEILPVSM	721	728	0.0013	0.049	-0.0178	0.0095
72	LLQYGSF	750	756	-0.2966	-0.1246	-0.1102	-0.1101
73	LQYGSF	751	756	-0.1853	-0.0922	-0.0248	-0.0569
74	NRALTGIA	761	768	-0.1261	-0.1332	-0.244	-0.1916
75	IAVEQDKNTQEVF	767	779	0.0171	0.0296	-0.0683	-0.1976
76	VEQDKNTQEVF	769	779	0.0214	0.022	-0.0819	-0.0564
77	AQVKQIYKTPPIKD	780	793	-0.2637	-0.1968	-0.1861	-0.306
78	IEDLL	815	819	0.0064	0.0499	0.0214	0.0541
79	LLFNKVTL	818	825	-0.1134	-0.0516	-0.0462	-0.1814
80	LFNKVTL	819	825	-0.3879	-0.1994	-0.318	-0.2629
81	FNKVTL	820	825	-0.0058	0.042	-0.0235	-0.0272
82	FNKVTLADAG	820	829	-0.1283	-0.1591	-0.3598	-0.2087
83	FNKVTLADAGF	820	830	-0.32	-0.2136	-0.3136	-0.274
84	NKVTLADAGF	821	830	-0.3139	-0.2851	-0.3215	-0.2218
85	ADAGF	826	830	-0.0301	-0.011	-0.0425	-0.0659
86	TVLPPLL	856	862	-0.1006	-0.1425	-0.3835	-0.2805
87	IAQYTSAL	867	874	-0.0338	0.0393	0.0564	0.1368
88	LAGTITSG	875	882	-0.1591	0.0125	0.0933	0.2595
89	MAYRF	899	903	-0.0438	-0.0063	0.0088	-0.0022
90	AYRFNGIGVTQ	900	910	0.0198	0.0694	-0.0695	0.3614
91	MAYRFNGIGVTQNVL	899	913	0.0201	0.0266	0.2261	0.0477
92	AYRFNGIGVTQNVL	900	913	-0.0797	0.0891	0.0287	0.0206
93	YRFNGIGVTQNVL	901	913	-0.067	0.0798	0.0521	0.1229
94	NGIGVTQNVL	904	913	-0.084	0.0493	-0.0509	-0.0169
95	IGVTQNVL	906	913	-0.0396	0.0075	-0.0024	-0.1112
96	YENQKL	914	919	-0.0842	-0.0202	-0.0469	-0.0338
97	IANQF	920	924	-0.0193	0.0212	0.0112	-0.0398
98	IANQFNSAIGKIQDSL	920	935	-0.3099	-0.2748	-0.2147	-0.1694
99	NSAIGKIQDSL	925	935	-0.2662	-0.1932	-0.2604	-0.1417
100	IGKIQDSL	928	935	-0.3108	-0.2482	-0.4518	-0.3308
101	IGKIQDSLSSTASAL	928	942	0.1665	0.3814	0.033	0.1151
102	NSAIGKIQDSLSSTASALGKLQD	925	947	0.2932	0.3305	0.2489	0.3365
103	SSTASAL	936	942	0.1587	0.2619	0.2904	0.3302
104	KLQDVVNQN	944	952	-0.3753	-0.1817	-0.2417	-0.197
105	GKLQDVVNQNAQALNT	943	958	-0.7535	-0.4278	-0.242	-0.3422
106	QALNT	954	958	-0.1619	-0.105	-0.0278	-0.0048
107	LVKQLSSNF	959	967	-0.4392	-0.2734	-0.3366	-0.2319
108	VKQLSSNF	960	967	-0.2446	-0.1804	-0.3421	-0.2298
109	LVKQLSSNFGAISSVL	959	974	-0.5822	-0.7055	-0.8173	-0.4847
110	GAISSVL	968	974	-0.4966	-0.3923	-0.4693	-0.2381
111	VQIDRL	988	993	-0.1811	0.0011	-0.0776	-0.1334
112	VQIDRLITGRL	988	998	-0.0826	-0.0771	-0.2463	-0.2089
113	IDRLITGRL	990	998	0.0459	0.0379	0.2216	0.3607
114	ITGRL	994	998	-0.0594	0.0109	0.0458	0.0647
115	QSLQT	999	1003	0.1632	0.1331	0.1421	0.0919
116	YVTQQL	1004	1009	0.1139	0.173	0.1511	0.1914
117	AEIRASANL	1013	1021	0.1907	0.2473	0.2611	0.314
118	IRASANL	1015	1021	0.2293	0.2458	0.2355	0.2502
119	MSFPQSAPHGVVF	1047	1059	0.1169	0.0095	0.0299	0.0585
120	PREGVF	1087	1092	0.0003	0.041	-0.0052	0.0045
121	FYEPQIITT	1106	1114	0.0415	0.2844	0.209	0.171
122	DSFKEEL	1143	1149	-0.4927	-0.1685	0.0037	0.0971
123	QELGKYEQY	1198	1206	-0.165	0.0171	-0.1449	-0.1236
124	GSGYI	1221	1225	-0.1862	-0.1193	-0.3543	-0.4057
125	YVRKDGEW	1235	1242	-0.0748	-0.0908	-0.1223	-0.1256
126	VLLST	1243	1247	-0.0518	-0.0112	-0.1185	-0.0347
127	VLLSTF	1243	1248	-0.1738	-0.0763	-0.2214	-0.1137
