# Supplementary material for: Timeline of changes in spike conformational dynamics in emergent SARS-CoV-2 variants reveal progressive stabilization of trimer stalk with altered NTD dynamics
Source: eLife. 2023 Mar 17;12:e82584. doi: 10.7554/eLife.82584 (PMC10049203; doi:10.7554/eLife.82584)
Supplement: Figure 4—source data 2. [file elife-82584-fig4-data2.xlsx]

## Sheet: Figure 4- Source Data 2- Alpha 
Protein	Start	End	Sequence	MaxUptake	State	Exposure	RT_diff_ave	RT_diff_SD	Center_diff_ave	Center_diff_SD	Uptake_diff_ave	Uptake_diff_SD	RU_diff_ave	RU_diff_SD	Correction	Welch_pValue	BH_sig	Significance
SARS-CoV-2	32	42	FTRGVYYPDKV	9	ALPHA - D614G BR2	1	0.165361	0.00524518	0.0463647	0.021517	0.0545515	0.043034	0.00606128	0.00478156	Not corrected	0.180289	0	Non significant
SARS-CoV-2	32	43	FTRGVYYPDKVF	10	ALPHA - D614G BR2	1	0.204798	0.0073953	-0.0123973	0.0262582	-0.0994155	0.0787747	-0.00994155	0.00787747	Not corrected	0.165264	0	Non significant
SARS-CoV-2	32	48	FTRGVYYPDKVFRSSVL	15	ALPHA - D614G BR2	1	0.222728	0.00810286	-0.0473163	0.0129054	-0.28695	0.0516215	-0.01913	0.00344143	Not corrected	0.0126597	0	Non significant
SARS-CoV-2	49	54	HSTQDL	5	ALPHA - D614G BR2	1	0.0878687	0.0151265	0.024272	0.0301967	-0.0062907	0.0301967	-0.00125814	0.00603935	Not corrected	0.771033	0	Non significant
SARS-CoV-2	49	55	HSTQDLF	6	ALPHA - D614G BR2	1	0.184501	0.00569908	0.0232987	0.0400645	0.0354147	0.0400645	0.00590246	0.00667741	Not corrected	0.289821	0	Non significant
SARS-CoV-2	49	56	HSTQDLFL	7	ALPHA - D614G BR2	1	0.229575	0.00641191	-0.0126717	0.0472997	-0.0686551	0.0472997	-0.00980787	0.0067571	Not corrected	0.129723	0	Non significant
SARS-CoV-2	85	91	PFNDGVY	5	ALPHA - D614G BR2	1	0.143012	0.00423922	0.152263	0.0259713	0.146189	0.0259713	0.0292378	0.00519426	Not corrected	0.00735572	0	Non significant
SARS-CoV-2	92	106	FASTEKSNIIRGWIF	14	ALPHA - D614G BR2	1	0.280037	0.00784866	0.0577643	0.0300779	0.237721	0.0902338	0.0169801	0.00644527	Not corrected	0.0210901	0	Non significant
SARS-CoV-2	104	110	WIFGTTL	6	ALPHA - D614G BR2	1	0.267688	0.00893257	0.074182	0.0608878	0.0914569	0.0608878	0.0152428	0.010148	Not corrected	0.134309	0	Non significant
SARS-CoV-2	111	117	DSKTQSL	6	ALPHA - D614G BR2	1	0.139656	0.0204793	0.0246983	0.0342792	0.0057233	0.0342792	0.000953883	0.0057132	Not corrected	0.820058	0	Non significant
SARS-CoV-2	111	118	DSKTQSLL	7	ALPHA - D614G BR2	1	0.163995	0.00597876	0.0444303	0.0228551	-0.0641907	0.0457101	-0.0091701	0.00653002	Not corrected	0.33737	0	Non significant
SARS-CoV-2	192	200	FVFKNIDGY	8	ALPHA - D614G BR2	1	0.197962	0.00804425	0.0106803	0.0140482	0.0149373	0.0280963	0.00186716	0.00351204	Not corrected	0.506027	0	Non significant
SARS-CoV-2	192	201	FVFKNIDGYF	9	ALPHA - D614G BR2	1	0.240727	0.00777712	-0.0427047	0.00796086	-0.12591	0.0159217	-0.01399	0.00176908	Not corrected	0.000402102	0	Non significant
SARS-CoV-2	195	201	KNIDGYF	6	ALPHA - D614G BR2	1	0.179724	0.00571168	-0.0205547	0.0141035	-0.0793005	0.0141035	-0.0132168	0.00235058	Not corrected	0.00145105	0	Non significant
SARS-CoV-2	202	212	KIYSKHTPINL	9	ALPHA - D614G BR2	1	0.178372	0.00825988	0.156641	0.0276515	0.258809	0.0553031	0.0287566	0.00614479	Not corrected	0.012198	0	Non significant
SARS-CoV-2	213	220	VRDLPQGF	6	ALPHA - D614G BR2	1	0.17649	0.00673073	0.155615	0.162462	0.27262	0.324923	0.0454366	0.0541538	Not corrected	0.328793	0	Non significant
SARS-CoV-2	245	264	HRSYLTPGDSSSGWTAGAAA	18	ALPHA - D614G BR2	1	0.168886	0.00620016	0.309134	0.13074	0.629393	0.261481	0.0349663	0.0145267	Not corrected	0.0606712	0	Non significant
SARS-CoV-2	245	265	HRSYLTPGDSSSGWTAGAAAY	19	ALPHA - D614G BR2	1	0.18297	0.00691023	0.198188	0.112798	0.572413	0.338394	0.030127	0.0178102	Not corrected	0.106602	0	Non significant
SARS-CoV-2	265	276	YYVGYLQPRTFL	10	ALPHA - D614G BR2	1	0.260137	0.00810408	-0.066011	0.0187783	-0.113504	0.0375565	-0.0113504	0.00375565	Not corrected	0.0127279	0	Non significant
SARS-CoV-2	266	276	YVGYLQPRTFL	9	ALPHA - D614G BR2	1	0.251236	0.00811374	-0.0278013	0.0131919	-0.120257	0.0263839	-0.0133619	0.00293154	Not corrected	0.00390141	0	Non significant
SARS-CoV-2	267	276	VGYLQPRTFL	8	ALPHA - D614G BR2	1	0.242137	0.00897527	0.0497107	0.0370939	-0.00649763	0.0741879	-0.000812204	0.00927348	Not corrected	0.902423	0	Non significant
SARS-CoV-2	269	276	YLQPRTFL	6	ALPHA - D614G BR2	1	0.228851	0.00689899	0.0597587	0.0106781	0.102623	0.0213563	0.0171038	0.00355938	Not corrected	0.00603104	0	Non significant
SARS-CoV-2	291	303	CALDPLSETKCTL	11	ALPHA - D614G BR2	1	0.232409	0.00843714	0.14525	0.0605893	0.293325	0.121179	0.0266659	0.0110162	Not corrected	0.0549067	0	Non significant
SARS-CoV-2	306	313	FTVEKGIY	7	ALPHA - D614G BR2	1	0.175023	0.00696145	0.010397	0.0286484	-0.0180492	0.0572968	-0.00257845	0.00818526	Not corrected	0.661208	0	Non significant
SARS-CoV-2	306	317	FTVEKGIYQTSN	11	ALPHA - D614G BR2	1	0.156599	0.00636937	0.00859933	0.0203992	0.0175983	0.0407984	0.00159984	0.00370894	Not corrected	0.553519	0	Non significant
SARS-CoV-2	310	318	KGIYQTSNF	8	ALPHA - D614G BR2	1	0.15446	0.00779064	-0.073307	0.0449444	-0.16852	0.0898888	-0.021065	0.0112361	Not corrected	0.0556618	0	Non significant
SARS-CoV-2	314	318	QTSNF	4	ALPHA - D614G BR2	1	0.099786	0.00725099	-0.125563	0.0517089	-0.133395	0.0517089	-0.0333488	0.0129272	Not corrected	0.0500049	0	Non significant
SARS-CoV-2	318	325	FRVQPTES	6	ALPHA - D614G BR2	1	0.126445	0.00564128	-0.203719	0.0265668	-0.193534	0.0265668	-0.0322557	0.0044278	Not corrected	0.0478813	0	Non significant
SARS-CoV-2	369	374	YNSASF	5	ALPHA - D614G BR2	1	0.121006	0.00461914	0.140529	0.09053	0.155969	0.09053	0.0311938	0.018106	Not corrected	0.110695	0	Non significant
SARS-CoV-2	388	392	NDLCF	4	ALPHA - D614G BR2	1	0.192014	0.00541804	0.144965	0.0454923	0.173856	0.0454923	0.0434639	0.0113731	Not corrected	0.0165448	0	Non significant
SARS-CoV-2	396	400	YADSF	4	ALPHA - D614G BR2	1	0.129935	0.00461589	0.0738693	0.058332	0.029071	0.058332	0.00726775	0.014583	Not corrected	0.498819	0	Non significant
SARS-CoV-2	400	406	FVIRGDE	6	ALPHA - D614G BR2	1	0.144528	0.0051241	-0.0627987	0.0117075	-0.147919	0.0234151	-0.0246531	0.00390251	Not corrected	0.00349472	0	Non significant
SARS-CoV-2	401	420	VIRGDEVRQIAPGQTGKIAD	18	ALPHA - D614G BR2	1	0.146267	0.00989902	-0.0595827	0.0734727	-0.287476	0.220418	-0.0159709	0.0122454	Not corrected	0.185267	0	Non significant
SARS-CoV-2	401	421	VIRGDEVRQIAPGQTGKIADY	19	ALPHA - D614G BR2	1	0.16881	0.0056631	-0.052864	0.0186378	-0.116084	0.0559135	-0.00610969	0.00294282	Not corrected	0.165599	0	Non significant
SARS-CoV-2	407	420	VRQIAPGQTGKIAD	12	ALPHA - D614G BR2	1	0.131312	0.00730125	0.0342493	0.0668454	0.0313102	0.133691	0.00260918	0.0111409	Not corrected	0.756315	0	Non significant
SARS-CoV-2	407	421	VRQIAPGQTGKIADY	13	ALPHA - D614G BR2	1	0.154712	0.00718412	0.0211745	0.0770714	0.078908	0.231214	0.00606984	0.0177857	Not corrected	0.770748	0	Non significant
SARS-CoV-2	407	422	VRQIAPGQTGKIADYN	14	ALPHA - D614G BR2	1	0.14165	0.00581171	-0.0166367	0.0485803	-0.0258153	0.0971605	-0.00184395	0.00694004	Not corrected	0.720916	0	Non significant
SARS-CoV-2	421	429	YNYKLPDDF	7	ALPHA - D614G BR2	1	0.201184	0.00702354	0.0627083	0.0222194	0.0712334	0.0444389	0.0101762	0.00634841	Not corrected	0.0757762	0	Non significant
SARS-CoV-2	422	429	NYKLPDDF	6	ALPHA - D614G BR2	1	0.194558	0.00568563	0.0708557	0.0425646	0.0889219	0.0851292	0.0148203	0.0141882	Not corrected	0.20667	0	Non significant
SARS-CoV-2	423	429	YKLPDDF	5	ALPHA - D614G BR2	1	0.195299	0.00679513	0.025381	0.0209519	-0.0171587	0.0419038	-0.00343173	0.00838076	Not corrected	0.574024	0	Non significant
SARS-CoV-2	442	452	DSKVGGNYNYL	10	ALPHA - D614G BR2	1	0.166186	0.00669548	0.0487573	0.0722641	0.0612791	0.144528	0.00612791	0.0144528	Not corrected	0.588979	0	Non significant
SARS-CoV-2	444	452	KVGGNYNYL	8	ALPHA - D614G BR2	1	0.183818	0.00377535	-0.0351985	0.0337147	-0.110982	0.0674294	-0.0138728	0.00842867	Not corrected	0.304554	0	Non significant
SARS-CoV-2	453	467	YRLFRKSNLKPFERD	13	ALPHA - D614G BR2	1	0.16203	0.00695173	-0.0394127	0.0169849	-0.172704	0.0679396	-0.0132849	0.00522612	Not corrected	0.0545245	0	Non significant
SARS-CoV-2	456	467	FRKSNLKPFERD	10	ALPHA - D614G BR2	1	0.137327	0.00593094	-0.0611437	0.010312	-0.159658	0.0206241	-0.0159658	0.00206241	Not corrected	0.00569867	0	Non significant
SARS-CoV-2	456	470	FRKSNLKPFERDIST	13	ALPHA - D614G BR2	1	0.158167	0.00777441	-0.0550793	0.0341722	-0.217924	0.136689	-0.0167634	0.0105145	Not corrected	0.0868606	0	Non significant
SARS-CoV-2	456	471	FRKSNLKPFERDISTE	14	ALPHA - D614G BR2	1	0.157968	0.00693646	-0.00230367	0.0247359	-0.183784	0.0742078	-0.0131274	0.00530056	Not corrected	0.0338179	0	Non significant
SARS-CoV-2	497	505	FQPTNGVGY	7	ALPHA - D614G BR2	1	0.23043	0.00699073	0.0518507	0.0409915	0.0537478	0.0409915	0.00767826	0.00585593	Not corrected	0.12295	0	Non significant
SARS-CoV-2	511	515	VVLSF	4	ALPHA - D614G BR2	1	0.220785	0.00707852	0.010667	0.0269489	0.00213509	0.0269489	0.000533772	0.00673722	Not corrected	0.91156	0	Non significant
SARS-CoV-2	542	552	NFNGLTGTGVL	10	ALPHA - D614G BR2	1	0.215785	0.00737815	0.0521847	0.0516021	0.0510897	0.0516021	0.00510897	0.00516021	Not corrected	0.23321	0	Non significant
SARS-CoV-2	544	552	NGLTGTGVL	8	ALPHA - D614G BR2	1	0.190807	0.0067555	0.0314113	0.0390554	0.022244	0.0390554	0.0027805	0.00488192	Not corrected	0.445494	0	Non significant
SARS-CoV-2	553	565	TESNKKFLPFQQF	11	ALPHA - D614G BR2	1	0.241787	0.00723575	-0.0262447	0.0774799	-0.011466	0.15496	-0.00104237	0.0140872	Not corrected	0.921173	0	Non significant
SARS-CoV-2	553	568	TESNKKFLPFQQFGRD	14	ALPHA - D614G BR2	1	0.208632	0.00676397	-0.0141363	0.0295508	-0.165549	0.0886523	-0.0118249	0.00633231	Not corrected	0.0902822	0	Non significant
SARS-CoV-2	575	582	AVRDPQTL	6	ALPHA - D614G BR2	1	0.126064	0.0050153	0.0784653	0.0274531	0.0745496	0.0549063	0.0124249	0.00915104	Not corrected	0.158583	0	Non significant
SARS-CoV-2	575	583	AVRDPQTLE	7	ALPHA - D614G BR2	1	0.126384	0.00584588	0.0520517	0.0597698	0.049852	0.11954	0.00712171	0.0170771	Not corrected	0.569235	0	Non significant
SARS-CoV-2	576	582	VRDPQTL	5	ALPHA - D614G BR2	1	0.129779	0.00667979	0.0288213	0.0174504	0.000639463	0.0174504	0.000127893	0.00349009	Not corrected	0.958943	0	Non significant
SARS-CoV-2	586	592	DITPCSF	5	ALPHA - D614G BR2	1	0.183165	0.00606665	0.376966	0.110955	0.368881	0.110955	0.0737763	0.0221909	Not corrected	0.0246561	0	Non significant
SARS-CoV-2	605	621	SNQVAVLYQGVNCTEVP	15	ALPHA - D614G BR2	1	0.210628	0.00714723	0.079292	0.045939	0.211762	0.137817	0.0141175	0.00918779	Not corrected	0.0841212	0	Non significant
SARS-CoV-2	627	633	DQLTPTW	5	ALPHA - D614G BR2	1	0.178064	0.00539446	0.477526	0.310193	0.477632	0.310193	0.0955264	0.0620386	Not corrected	0.140811	0	Non significant
SARS-CoV-2	634	643	RVYSTGSNVF	9	ALPHA - D614G BR2	1	0.165561	0.00672721	0.185633	0.158298	0.15436	0.158298	0.0171511	0.0175887	Not corrected	0.27505	0	Non significant
SARS-CoV-2	664	682	IPIGAGICASYQTQTNSPA	16	ALPHA - D614G BR2	1	0.21105	0.00709848	0.0848027	0.0365713	0.115291	0.109714	0.00720569	0.00685712	Not corrected	0.245301	0	Non significant
SARS-CoV-2	685	691	ASQSIIA	6	ALPHA - D614G BR2	1	0.149323	0.00478896	-0.145373	0.129187	-0.130131	0.129187	-0.0216886	0.0215312	Not corrected	0.257279	0	Non significant
SARS-CoV-2	688	692	SIIAY	4	ALPHA - D614G BR2	1	0.174008	0.00616597	-0.0585847	0.0611811	-0.0437146	0.0611811	-0.0109286	0.0152953	Not corrected	0.375939	0	Non significant
SARS-CoV-2	692	696	YTMSL	4	ALPHA - D614G BR2	1	0.179683	0.0064192	-0.05129	0.0313816	-0.0746023	0.0313816	-0.0186506	0.00784541	Not corrected	0.0444798	0	Non significant
SARS-CoV-2	716	720	TISVT	4	ALPHA - D614G BR2	1	0.132028	0.00708485	-0.031412	0.0316638	-0.0307193	0.0316638	-0.00767983	0.00791595	Not corrected	0.256853	0	Non significant
SARS-CoV-2	721	727	TEILPVS	5	ALPHA - D614G BR2	1	0.196988	0.00829411	-0.011273	0.0301269	-0.0051797	0.0301269	-0.00103594	0.00602537	Not corrected	0.819619	0	Non significant
SARS-CoV-2	721	728	TEILPVSM	6	ALPHA - D614G BR2	1	0.227551	0.008123	0.00499767	0.0202069	0.00147757	0.0202069	0.000246261	0.00336782	Not corrected	0.9182	0	Non significant
SARS-CoV-2	750	756	LLQYGSF	6	ALPHA - D614G BR2	1	0.195853	0.0063809	-0.315378	0.0585818	-0.299043	0.0585818	-0.0498404	0.00976364	Not corrected	0.0149307	0	Non significant
SARS-CoV-2	751	756	LQYGSF	5	ALPHA - D614G BR2	1	0.166503	0.00705913	-0.205333	0.0659284	-0.186588	0.0659284	-0.0373177	0.0131857	Not corrected	0.0468533	0	Non significant
SARS-CoV-2	761	768	NRALTGIA	7	ALPHA - D614G BR2	1	0.157878	0.00691129	-0.13806	0.00930178	-0.126253	0.00930178	-0.0180361	0.00132883	Not corrected	5.15536e-05	0	Non significant
SARS-CoV-2	767	779	IAVEQDKNTQEVF	12	ALPHA - D614G BR2	1	0.175867	0.00629485	0.031943	0.038739	0.0169038	0.0774781	0.00140865	0.00645651	Not corrected	0.772309	0	Non significant
SARS-CoV-2	769	779	VEQDKNTQEVF	10	ALPHA - D614G BR2	1	0.153716	0.00591027	0.029025	0.0128794	0.0227321	0.0257588	0.00227321	0.00257588	Not corrected	0.257757	0	Non significant
SARS-CoV-2	780	793	AQVKQIYKTPPIKD	11	ALPHA - D614G BR2	1	0.15396	0.00634226	-0.118526	0.0795598	-0.246547	0.15912	-0.0224134	0.0144654	Not corrected	0.09971	0	Non significant
SARS-CoV-2	815	819	IEDLL	4	ALPHA - D614G BR2	1	0.208506	0.00741142	0.0102553	0.0080594	0.00667817	0.0080594	0.00166954	0.00201485	Not corrected	0.323899	0	Non significant
SARS-CoV-2	818	825	LLFNKVTL	7	ALPHA - D614G BR2	1	0.250728	0.00833072	-0.041691	0.0241189	-0.117222	0.0482379	-0.0167459	0.00689112	Not corrected	0.0276929	0	Non significant
SARS-CoV-2	820	825	FNKVTL	5	ALPHA - D614G BR2	1	0.190168	0.00717088	-0.009792	0.0603831	-0.0106342	0.0603831	-0.00212685	0.0120766	Not corrected	0.812565	0	Non significant
SARS-CoV-2	820	829	FNKVTLADAG	9	ALPHA - D614G BR2	1	0.158424	0.00689971	-0.0270947	0.0530878	-0.126969	0.106176	-0.0141076	0.0117973	Not corrected	0.180865	0	Non significant
SARS-CoV-2	821	830	NKVTLADAGF	9	ALPHA - D614G BR2	1	0.193686	0.00661937	-0.157733	0.0442558	-0.311241	0.0885116	-0.0345823	0.00983462	Not corrected	0.0240303	0	Non significant
SARS-CoV-2	826	830	ADAGF	4	ALPHA - D614G BR2	1	0.110212	0.00456741	-0.0219433	0.0568824	-0.0251224	0.0568824	-0.00628061	0.0142206	Not corrected	0.570624	0	Non significant
SARS-CoV-2	856	862	TVLPPLL	4	ALPHA - D614G BR2	1	0.267237	0.00836372	-0.0730387	0.0571746	-0.107258	0.0571746	-0.0268145	0.0142937	Not corrected	0.0704642	0	Non significant
SARS-CoV-2	867	874	IAQYTSAL	7	ALPHA - D614G BR2	1	0.165143	0.00583169	-0.0334807	0.0294546	-0.0364126	0.0294546	-0.0052018	0.00420781	Not corrected	0.166496	0	Non significant
SARS-CoV-2	899	903	MAYRF	4	ALPHA - D614G BR2	1	0.17543	0.00549627	-0.0228527	0.0246017	-0.0434843	0.0246017	-0.0108711	0.00615043	Not corrected	0.0569982	0	Non significant
SARS-CoV-2	899	913	MAYRFNGIGVTQNVL	14	ALPHA - D614G BR2	1	0.234044	0.00837013	0.0309632	0.0142706	0.0181491	0.0285412	0.00129636	0.00203866	Not corrected	0.427186	0	Non significant
SARS-CoV-2	900	910	AYRFNGIGVTQ	10	ALPHA - D614G BR2	1	0.175329	0.00706588	0.0502977	0.0967527	0.0358518	0.193505	0.00358518	0.0193505	Not corrected	0.801916	0	Non significant
SARS-CoV-2	900	913	AYRFNGIGVTQNVL	13	ALPHA - D614G BR2	1	0.224341	0.00758524	-0.0465377	0.0325565	-0.0814749	0.0651129	-0.0062673	0.00500869	Not corrected	0.195143	0	Non significant
SARS-CoV-2	901	913	YRFNGIGVTQNVL	12	ALPHA - D614G BR2	1	0.228133	0.00869468	-0.0137497	0.0132724	-0.0674465	0.0265448	-0.00562054	0.00221206	Not corrected	0.0425222	0	Non significant
SARS-CoV-2	904	913	NGIGVTQNVL	9	ALPHA - D614G BR2	1	0.194442	0.00766579	-0.0760817	0.0538001	-0.0843169	0.0538001	-0.00936854	0.00597779	Not corrected	0.0800443	0	Non significant
SARS-CoV-2	906	913	IGVTQNVL	7	ALPHA - D614G BR2	1	0.191427	0.00683058	0.0360167	0.0609692	-0.0404518	0.0609692	-0.00577883	0.00870988	Not corrected	0.392726	0	Non significant
SARS-CoV-2	914	919	YENQKL	5	ALPHA - D614G BR2	1	0.125052	0.0133685	-0.038373	0.0167635	-0.0865964	0.033527	-0.0173193	0.00670539	Not corrected	0.0558261	0	Non significant
SARS-CoV-2	920	924	IANQF	4	ALPHA - D614G BR2	1	0.131735	0.00512263	0.00565467	0.0111844	-0.0193145	0.0111844	-0.00482862	0.00279609	Not corrected	0.0681252	0	Non significant
SARS-CoV-2	928	935	IGKIQDSL	7	ALPHA - D614G BR2	1	0.172945	0.00476026	-0.140035	0.065637	-0.327595	0.131274	-0.0467992	0.0187534	Not corrected	0.0211466	0	Non significant
SARS-CoV-2	928	942	IGKIQDSLSSTASAL	14	ALPHA - D614G BR2	1	0.194309	0.00630779	0.076699	0.0952602	0.176415	0.19052	0.0126011	0.0136086	Not corrected	0.237674	0	Non significant
SARS-CoV-2	936	942	SSTASAL	6	ALPHA - D614G BR2	1	0.12187	0.00692515	0.167959	0.148253	0.150658	0.148253	0.0251096	0.0247089	Not corrected	0.261971	0	Non significant
SARS-CoV-2	943	958	GKLQDVVNQNAQALNT	15	ALPHA - D614G BR2	1	0.156549	0.00627791	-0.365233	0.111604	-0.731228	0.223208	-0.0487486	0.0148805	Not corrected	0.030037	0	Non significant
SARS-CoV-2	944	952	KLQDVVNQN	8	ALPHA - D614G BR2	1	0.174478	0.00634408	-0.409149	0.110881	-0.38201	0.110881	-0.0477513	0.0138601	Not corrected	0.0195942	0	Non significant
SARS-CoV-2	954	958	QALNT	4	ALPHA - D614G BR2	1	0.099773	0.0166058	-0.182667	0.0348674	-0.160068	0.0348674	-0.0400169	0.00871686	Not corrected	0.00377602	0	Non significant
SARS-CoV-2	960	967	VKQLSSNF	7	ALPHA - D614G BR2	1	0.154666	0.00672687	-0.0957627	0.0423282	-0.248722	0.0846564	-0.0355317	0.0120938	Not corrected	0.0247292	0	Non significant
SARS-CoV-2	988	993	VQIDRL	5	ALPHA - D614G BR2	1	0.173231	0.00675929	-0.161175	0.057046	-0.183549	0.057046	-0.0367098	0.0114092	Not corrected	0.0353439	0	Non significant
SARS-CoV-2	988	998	VQIDRLITGRL	10	ALPHA - D614G BR2	1	0.23166	0.00722079	-0.0413943	0.0235347	-0.0828156	0.0470695	-0.00828156	0.00470695	Not corrected	0.0762595	0	Non significant
SARS-CoV-2	990	998	IDRLITGRL	8	ALPHA - D614G BR2	1	0.191745	0.00657599	0.0499277	0.0348268	0.0486187	0.0696537	0.00607733	0.00870671	Not corrected	0.361503	0	Non significant
SARS-CoV-2	994	998	ITGRL	4	ALPHA - D614G BR2	1	0.139963	0.00750483	-0.0256987	0.046891	-0.0621667	0.046891	-0.0155417	0.0117228	Not corrected	0.167305	0	Non significant
SARS-CoV-2	999	1003	QSLQT	4	ALPHA - D614G BR2	1	0.131666	0.0206018	0.169187	0.0198442	0.162636	0.0198442	0.040659	0.00496104	Not corrected	0.00322051	0	Non significant
SARS-CoV-2	1004	1009	YVTQQL	5	ALPHA - D614G BR2	1	0.140796	0.00542069	0.118987	0.0439977	0.116388	0.0439977	0.0232775	0.00879954	Not corrected	0.0319214	0	Non significant
SARS-CoV-2	1013	1017	AEIRA	4	ALPHA - D614G BR2	1	0.09359	0.014226	0.15776	0.0456421	0.13879	0.0456421	0.0346975	0.0114105	Not corrected	0.0328977	0	Non significant
SARS-CoV-2	1013	1021	AEIRASANL	8	ALPHA - D614G BR2	1	0.145754	0.00660244	0.196245	0.154173	0.196244	0.154173	0.0245305	0.0192716	Not corrected	0.194645	0	Non significant
SARS-CoV-2	1015	1021	IRASANL	6	ALPHA - D614G BR2	1	0.140132	0.00610642	0.216124	0.0525713	0.230137	0.0525713	0.0383562	0.00876189	Not corrected	0.00727137	0	Non significant
SARS-CoV-2	1047	1059	MSFPQSAPHGVVF	10	ALPHA - D614G BR2	1	0.229928	0.00706646	0.046521	0.0279787	0.120993	0.0559574	0.0120993	0.00559574	Not corrected	0.0333022	0	Non significant
SARS-CoV-2	1087	1092	PREGVF	4	ALPHA - D614G BR2	1	0.160385	0.00492488	0.03449	0.0374919	0.00179781	0.0374919	0.000449452	0.00937297	Not corrected	0.946112	0	Non significant
SARS-CoV-2	1088	1100	REGVFVSNGTHWF	12	ALPHA - D614G BR2	1	0.206672	0.00797359	0.0592977	0.0214294	0.139102	0.0428588	0.0115919	0.00357157	Not corrected	0.0197469	0	Non significant
SARS-CoV-2	1106	1114	FYEPQIITT	7	ALPHA - D614G BR2	1	0.195429	0.00739535	-0.0144107	0.146376	0.0247997	0.146376	0.00354282	0.0209108	Not corrected	0.821167	0	Non significant
SARS-CoV-2	1198	1206	QELGKYEQY	8	ALPHA - D614G BR2	1	0.128376	0.00579866	-0.168714	0.0373744	-0.167386	0.0373744	-0.0209233	0.00467179	Not corrected	0.012362	0	Non significant
SARS-CoV-2	1221	1225	GSGYI	4	ALPHA - D614G BR2	1	0.166183	0.00603444	-0.222692	0.0577855	-0.188864	0.0577855	-0.047216	0.0144464	Not corrected	0.0242396	0	Non significant
SARS-CoV-2	1235	1242	YVRKDGEW	7	ALPHA - D614G BR2	1	0.128573	0.0075675	-0.0887233	0.0859267	-0.0915008	0.0859267	-0.0130715	0.0122752	Not corrected	0.25115	0	Non significant
SARS-CoV-2	1243	1247	VLLST	4	ALPHA - D614G BR2	1	0.165556	0.00751161	-0.0615963	0.0646944	-0.0428431	0.0646944	-0.0107108	0.0161736	Not corrected	0.420417	0	Non significant
SARS-CoV-2	1243	1248	VLLSTF	5	ALPHA - D614G BR2	1	0.22685	0.00762558	-0.185733	0.0264125	-0.173951	0.0264125	-0.0347902	0.0052825	Not corrected	0.00118364	0	Non significant
SARS-CoV-2	306	318	FTVEKGIYQTSNF	12	ALPHA - D614G BR2	1	0.191871	0.00615255	-0.138063	0.0135524	-0.368697	0.0271048	-0.0307248	0.00225873	Not corrected	0.000172824	0	Protected
SARS-CoV-2	819	825	LFNKVTL	6	ALPHA - D614G BR2	1	0.214284	0.0075055	-0.165239	0.00723809	-0.388041	0.0144762	-0.0646735	0.0024127	Not corrected	0.000169397	0	Protected
SARS-CoV-2	820	830	FNKVTLADAGF	10	ALPHA - D614G BR2	1	0.216244	0.00727113	-0.124963	0.0268872	-0.32377	0.0537744	-0.032377	0.00537744	Not corrected	0.00745872	0	Protected
SARS-CoV-2	920	935	IANQFNSAIGKIQDSL	15	ALPHA - D614G BR2	1	0.228259	0.00614763	-0.154547	0.0376383	-0.314302	0.0752767	-0.0209535	0.00501845	Not corrected	0.00333342	0	Protected
SARS-CoV-2	925	935	NSAIGKIQDSL	10	ALPHA - D614G BR2	1	0.18818	0.00626787	-0.118623	0.0393615	-0.267177	0.078723	-0.0267177	0.0078723	Not corrected	0.00723827	0	Protected
SARS-CoV-2	959	967	LVKQLSSNF	8	ALPHA - D614G BR2	1	0.181298	0.00607432	-0.209063	0.0489681	-0.442124	0.0979361	-0.0552655	0.012242	Not corrected	0.00959362	0	Protected
SARS-CoV-2	959	974	LVKQLSSNFGAISSVL	15	ALPHA - D614G BR2	1	0.259547	0.00873764	-0.333399	0.0349209	-0.585449	0.0698419	-0.0390299	0.00465613	Not corrected	0.00498655	0	Protected
SARS-CoV-2	968	974	GAISSVL	6	ALPHA - D614G BR2	1	0.197256	0.00670346	-0.499214	0.103482	-0.498401	0.103482	-0.0830669	0.017247	Not corrected	0.0061421	0	Protected
SARS-CoV-2	92	103	FASTEKSNIIRG	11	ALPHA - D614G BR2	1	0.139982	0.00625193	0.273864	0.0147349	0.504684	0.0294697	0.0458804	0.00267906	Not corrected	0.000630962	0	Deprotected
SARS-CoV-2	93	103	ASTEKSNIIRG	10	ALPHA - D614G BR2	1	0.140288	0.00520273	0.296128	0.0367455	0.591844	0.073491	0.0591844	0.0073491	Not corrected	0.000535377	0	Deprotected
SARS-CoV-2	94	103	STEKSNIIRG	9	ALPHA - D614G BR2	1	0.139648	0.00496739	0.240582	0.0144766	0.4557	0.0289532	0.0506333	0.00321702	Not corrected	2.22889e-05	0	Deprotected
SARS-CoV-2	177	186	MDLEGKQGNF	9	ALPHA - D614G BR2	1	0.158876	0.00456855	0.180184	0.0409356	0.316754	0.0818712	0.0351949	0.0090968	Not corrected	0.00563177	0	Deprotected
SARS-CoV-2	177	191	MDLEGKQGNFKNLRE	14	ALPHA - D614G BR2	1	0.145393	0.00572401	0.189715	0.0156301	0.519123	0.0468903	0.0370802	0.00334931	Not corrected	0.00169554	0	Deprotected
SARS-CoV-2	180	191	EGKQGNFKNLRE	11	ALPHA - D614G BR2	1	0.120074	0.00887284	0.268157	0.0208056	0.488898	0.0416112	0.0444453	0.00378284	Not corrected	0.000163597	0	Deprotected
SARS-CoV-2	200	212	YFKIYSKHTPINL	11	ALPHA - D614G BR2	1	0.207819	0.00740523	0.120073	0.0277077	0.350178	0.0831232	0.0318343	0.00755665	Not corrected	0.00392287	0	Deprotected
SARS-CoV-2	201	212	FKIYSKHTPINL	10	ALPHA - D614G BR2	1	0.197979	0.00803304	0.20931	0.0139371	0.589571	0.0418114	0.0589571	0.00418114	Not corrected	0.000348124	0	Deprotected
SARS-CoV-2	243	264	ALHRSYLTPGDSSSGWTAGAAA	20	ALPHA - D614G BR2	1	0.169711	0.00771572	0.0898543	0.0119682	0.273526	0.0359046	0.0136763	0.00179523	Not corrected	0.000420634	0	Deprotected
SARS-CoV-2	925	947	NSAIGKIQDSLSSTASALGKLQD	22	ALPHA - D614G BR2	1	0.222753	0.00778501	0.121756	0.029759	0.291132	0.0595181	0.0132333	0.00270537	Not corrected	0.00732295	0	Deprotected
SARS-CoV-2	32	42	FTRGVYYPDKV	9	ALPHA - D614G BR2	2	0.171139	0.00253658	0.0889603	0.0295036	0.139743	0.0590071	0.015527	0.00655635	Not corrected	0.024138	0	Non significant
SARS-CoV-2	32	43	FTRGVYYPDKVF	10	ALPHA - D614G BR2	2	0.209226	0.00362128	0.0164877	0.0382788	-0.0127605	0.114836	-0.00127605	0.0114836	Not corrected	0.881205	0	Non significant
SARS-CoV-2	32	48	FTRGVYYPDKVFRSSVL	15	ALPHA - D614G BR2	2	0.228022	0.0035853	-0.0107483	0.0238747	-0.140678	0.095499	-0.00937855	0.0063666	Not corrected	0.144719	0	Non significant
SARS-CoV-2	49	54	HSTQDL	5	ALPHA - D614G BR2	2	0.103702	0.0107285	0.0847253	0.0140372	0.0541626	0.0140372	0.0108325	0.00280744	Not corrected	0.0278375	0	Non significant
SARS-CoV-2	49	55	HSTQDLF	6	ALPHA - D614G BR2	2	0.190024	0.00259356	0.0410357	0.0204323	0.0531517	0.0204323	0.00885862	0.00340538	Not corrected	0.0175342	0	Non significant
SARS-CoV-2	49	56	HSTQDLFL	7	ALPHA - D614G BR2	2	0.232054	0.00439053	-0.034348	0.0606499	-0.0903314	0.0606499	-0.0129045	0.00866428	Not corrected	0.10683	0	Non significant
SARS-CoV-2	85	91	PFNDGVY	5	ALPHA - D614G BR2	2	0.14638	0.00422839	0.160715	0.0719013	0.15464	0.0719013	0.0309281	0.0143803	Not corrected	0.197889	0	Non significant
SARS-CoV-2	92	103	FASTEKSNIIRG	11	ALPHA - D614G BR2	2	0.148442	0.00304666	0.324541	0.0577227	0.606039	0.115445	0.0550944	0.010495	Not corrected	0.0138366	0	Non significant
SARS-CoV-2	92	106	FASTEKSNIIRGWIF	14	ALPHA - D614G BR2	2	0.283471	0.00522759	0.0446877	0.0326779	0.198491	0.0980336	0.0141779	0.0070024	Not corrected	0.0727617	0	Non significant
SARS-CoV-2	94	103	STEKSNIIRG	9	ALPHA - D614G BR2	2	0.146087	0.00393953	0.314807	0.0619589	0.60415	0.123918	0.0671277	0.0137686	Not corrected	0.0158341	0	Non significant
SARS-CoV-2	104	110	WIFGTTL	6	ALPHA - D614G BR2	2	0.270625	0.00497239	-0.0204303	0.0793942	-0.00315543	0.0793942	-0.000525905	0.0132324	Not corrected	0.955495	0	Non significant
SARS-CoV-2	111	117	DSKTQSL	6	ALPHA - D614G BR2	2	0.164848	0.017939	0.0601193	0.0356827	0.0411443	0.0356827	0.00685738	0.00594711	Not corrected	0.16628	0	Non significant
SARS-CoV-2	111	118	DSKTQSLL	7	ALPHA - D614G BR2	2	0.174142	0.00116508	0.0291058	0.0359765	-0.0948397	0.071953	-0.0135485	0.010279	Not corrected	0.168887	0	Non significant
SARS-CoV-2	177	186	MDLEGKQGNF	9	ALPHA - D614G BR2	2	0.164698	0.00154104	0.353869	0.0887853	0.664123	0.177571	0.0737914	0.0197301	Not corrected	0.0248356	0	Non significant
SARS-CoV-2	177	191	MDLEGKQGNFKNLRE	14	ALPHA - D614G BR2	2	0.151909	0.00360179	0.246822	0.0558106	0.690443	0.167432	0.0493173	0.0119594	Not corrected	0.0228478	0	Non significant
SARS-CoV-2	192	199	FVFKNIDG	7	ALPHA - D614G BR2	2	0.193575	0.00355548	-0.0193895	0.0417436	-0.0106437	0.0834872	-0.00152053	0.0119267	Not corrected	0.862379	0	Non significant
SARS-CoV-2	192	200	FVFKNIDGY	8	ALPHA - D614G BR2	2	0.203981	0.00315266	0.00580433	0.0381024	0.00518528	0.0762048	0.00064816	0.00952559	Not corrected	0.927413	0	Non significant
SARS-CoV-2	192	201	FVFKNIDGYF	9	ALPHA - D614G BR2	2	0.244191	0.00575938	-0.015965	0.0290539	-0.0724303	0.0581078	-0.00804781	0.00645643	Not corrected	0.20172	0	Non significant
SARS-CoV-2	195	201	KNIDGYF	6	ALPHA - D614G BR2	2	0.184331	0.00313607	0.067153	0.0774833	0.00840713	0.0774833	0.00140119	0.0129139	Not corrected	0.883748	0	Non significant
SARS-CoV-2	202	212	KIYSKHTPINL	9	ALPHA - D614G BR2	2	0.189072	0.00362189	0.177636	0.0352297	0.3008	0.0704593	0.0334222	0.00782881	Not corrected	0.0151294	0	Non significant
SARS-CoV-2	243	264	ALHRSYLTPGDSSSGWTAGAAA	20	ALPHA - D614G BR2	2	0.176207	0.00347452	0.161934	0.173832	0.489766	0.521495	0.0244883	0.0260748	Not corrected	0.292917	0	Non significant
SARS-CoV-2	245	264	HRSYLTPGDSSSGWTAGAAA	18	ALPHA - D614G BR2	2	0.174915	0.00354949	0.41804	0.183903	0.847204	0.367805	0.0470669	0.0204336	Not corrected	0.0741243	0	Non significant
SARS-CoV-2	245	265	HRSYLTPGDSSSGWTAGAAAY	19	ALPHA - D614G BR2	2	0.187283	0.0032198	0.196436	0.151236	0.567158	0.453708	0.0298504	0.0238794	Not corrected	0.194489	0	Non significant
SARS-CoV-2	265	276	YYVGYLQPRTFL	10	ALPHA - D614G BR2	2	0.263531	0.00404293	-0.0624707	0.0213083	-0.106423	0.0426166	-0.0106423	0.00426166	Not corrected	0.0566838	0	Non significant
SARS-CoV-2	266	276	YVGYLQPRTFL	9	ALPHA - D614G BR2	2	0.254229	0.00411749	0.00496967	0.0149094	-0.0547149	0.0298189	-0.00607943	0.00331321	Not corrected	0.0943396	0	Non significant
SARS-CoV-2	267	276	VGYLQPRTFL	8	ALPHA - D614G BR2	2	0.247711	0.00302677	0.049153	0.0181482	-0.00761296	0.0362964	-0.000951621	0.00453705	Not corrected	0.778213	0	Non significant
SARS-CoV-2	269	276	YLQPRTFL	6	ALPHA - D614G BR2	2	0.23006	0.00344721	0.0395133	0.0136546	0.0621324	0.0273091	0.0103554	0.00455152	Not corrected	0.0653022	0	Non significant
SARS-CoV-2	306	313	FTVEKGIY	7	ALPHA - D614G BR2	2	0.180125	0.00300622	0.0323497	0.0353171	0.0258562	0.0706342	0.00369374	0.0100906	Not corrected	0.620729	0	Non significant
SARS-CoV-2	306	317	FTVEKGIYQTSN	11	ALPHA - D614G BR2	2	0.161459	0.00324799	0.0612713	0.032638	0.122942	0.065276	0.0111766	0.00593419	Not corrected	0.0664133	0	Non significant
SARS-CoV-2	314	318	QTSNF	4	ALPHA - D614G BR2	2	0.109217	0.00377034	-0.224276	0.0280757	-0.232109	0.0280757	-0.0580272	0.00701894	Not corrected	0.00148869	0	Non significant
SARS-CoV-2	318	325	FRVQPTES	6	ALPHA - D614G BR2	2	0.138102	0.00434291	-0.171776	0.0915145	-0.161591	0.0915145	-0.0269318	0.0152524	Not corrected	0.0737018	0	Non significant
SARS-CoV-2	369	374	YNSASF	5	ALPHA - D614G BR2	2	0.126389	0.00199527	0.24679	0.0982866	0.262229	0.0982866	0.0524459	0.0196573	Not corrected	0.0448445	0	Non significant
SARS-CoV-2	388	392	NDLCF	4	ALPHA - D614G BR2	2	0.19486	0.00381549	0.119714	0.0394318	0.148604	0.0394318	0.0371511	0.00985794	Not corrected	0.0237292	0	Non significant
SARS-CoV-2	396	400	YADSF	4	ALPHA - D614G BR2	2	0.133931	0.00321235	0.109444	0.0466376	0.0646457	0.0466376	0.0161614	0.0116594	Not corrected	0.165166	0	Non significant
SARS-CoV-2	400	406	FVIRGDE	6	ALPHA - D614G BR2	2	0.150188	0.00270441	-0.07627	0.0179342	-0.174861	0.0358683	-0.0291436	0.00597805	Not corrected	0.00301464	0	Non significant
SARS-CoV-2	401	420	VIRGDEVRQIAPGQTGKIAD	18	ALPHA - D614G BR2	2	0.1572	0.00444717	0.00783967	0.0156485	-0.085209	0.0469455	-0.00473383	0.00260809	Not corrected	0.0761872	0	Non significant
SARS-CoV-2	401	421	VIRGDEVRQIAPGQTGKIADY	19	ALPHA - D614G BR2	2	0.171217	0.00333386	0.0303803	0.0577537	0.133649	0.173261	0.00703415	0.00911901	Not corrected	0.363819	0	Non significant
SARS-CoV-2	407	420	VRQIAPGQTGKIAD	12	ALPHA - D614G BR2	2	0.138237	0.00407336	0.127945	0.0790247	0.218701	0.158049	0.0182251	0.0131708	Not corrected	0.172354	0	Non significant
SARS-CoV-2	407	422	VRQIAPGQTGKIADYN	14	ALPHA - D614G BR2	2	0.149072	0.00361727	0.063384	0.0284947	0.134226	0.0569894	0.00958757	0.00407067	Not corrected	0.0441429	0	Non significant
SARS-CoV-2	421	429	YNYKLPDDF	7	ALPHA - D614G BR2	2	0.204994	0.00306508	0.0592053	0.0197206	0.0642274	0.0394412	0.00917535	0.00563445	Not corrected	0.0715227	0	Non significant
SARS-CoV-2	422	429	NYKLPDDF	6	ALPHA - D614G BR2	2	0.197492	0.00408386	0.0704217	0.0478675	0.0880539	0.095735	0.0146756	0.0159558	Not corrected	0.296537	0	Non significant
SARS-CoV-2	423	429	YKLPDDF	5	ALPHA - D614G BR2	2	0.19896	0.00484867	0.0295517	0.0223905	-0.00881733	0.044781	-0.00176347	0.00895619	Not corrected	0.79107	0	Non significant
SARS-CoV-2	442	452	DSKVGGNYNYL	10	ALPHA - D614G BR2	2	0.170092	0.00288328	0.18951	0.0938391	0.342784	0.187678	0.0342784	0.0187678	Not corrected	0.111303	0	Non significant
SARS-CoV-2	444	452	KVGGNYNYL	8	ALPHA - D614G BR2	2	0.183049	0.00457403	-0.0197667	0.0169348	-0.0801187	0.0338695	-0.0100148	0.00423369	Not corrected	0.0611399	0	Non significant
SARS-CoV-2	453	467	YRLFRKSNLKPFERD	13	ALPHA - D614G BR2	2	0.167269	0.00223367	-0.00583667	0.0131261	-0.0384002	0.0525044	-0.00295386	0.0040388	Not corrected	0.36932	0	Non significant
SARS-CoV-2	456	467	FRKSNLKPFERD	10	ALPHA - D614G BR2	2	0.144997	0.00441867	-0.0175793	0.0402998	-0.0725291	0.0805995	-0.00725291	0.00805995	Not corrected	0.292718	0	Non significant
SARS-CoV-2	456	470	FRKSNLKPFERDIST	13	ALPHA - D614G BR2	2	0.16832	0.00411057	-0.0324223	0.0252034	-0.127296	0.100814	-0.00979202	0.00775489	Not corrected	0.188408	0	Non significant
SARS-CoV-2	456	471	FRKSNLKPFERDISTE	14	ALPHA - D614G BR2	2	0.164679	0.0071167	-0.0150215	0.0773323	-0.221938	0.231997	-0.0158527	0.0165712	Not corrected	0.480979	0	Non significant
SARS-CoV-2	497	505	FQPTNGVGY	7	ALPHA - D614G BR2	2	0.233767	0.004457	0.076319	0.0676677	0.0782161	0.0676677	0.0111737	0.00966681	Not corrected	0.163093	0	Non significant
SARS-CoV-2	511	515	VVLSF	4	ALPHA - D614G BR2	2	0.224562	0.00378883	0.003375	0.00849994	-0.00515691	0.00849994	-0.00128923	0.00212499	Not corrected	0.414275	0	Non significant
SARS-CoV-2	542	552	NFNGLTGTGVL	10	ALPHA - D614G BR2	2	0.219903	0.00363674	0.108948	0.0352509	0.107853	0.0352509	0.0107853	0.00352509	Not corrected	0.0109435	0	Non significant
SARS-CoV-2	544	552	NGLTGTGVL	8	ALPHA - D614G BR2	2	0.196095	0.00295335	0.0861427	0.0552402	0.0769753	0.0552402	0.00962191	0.00690503	Not corrected	0.108044	0	Non significant
SARS-CoV-2	553	565	TESNKKFLPFQQF	11	ALPHA - D614G BR2	2	0.246577	0.00357879	0.0251757	0.0211503	0.0913746	0.0423006	0.00830679	0.00384551	Not corrected	0.0722265	0	Non significant
SARS-CoV-2	553	568	TESNKKFLPFQQFGRD	14	ALPHA - D614G BR2	2	0.215196	0.00360851	0.022299	0.0339644	-0.056243	0.101893	-0.00401736	0.00727809	Not corrected	0.491096	0	Non significant
SARS-CoV-2	575	582	AVRDPQTL	6	ALPHA - D614G BR2	2	0.133654	0.00448452	0.024601	0.0107944	-0.0331791	0.0215888	-0.00552984	0.00359813	Not corrected	0.0923415	0	Non significant
SARS-CoV-2	575	583	AVRDPQTLE	7	ALPHA - D614G BR2	2	0.131882	0.0035029	0.00205067	0.0113409	-0.05015	0.0226819	-0.00716429	0.00324027	Not corrected	0.0296286	0	Non significant
SARS-CoV-2	576	582	VRDPQTL	5	ALPHA - D614G BR2	2	0.139633	0.00494612	-0.00639533	0.0395751	-0.0345772	0.0395751	-0.00691544	0.00791502	Not corrected	0.302755	0	Non significant
SARS-CoV-2	586	592	DITPCSF	5	ALPHA - D614G BR2	2	0.188374	0.00327751	0.471275	0.149512	0.46319	0.149512	0.0926381	0.0299025	Not corrected	0.0341313	0	Non significant
SARS-CoV-2	605	621	SNQVAVLYQGVNCTEVP	15	ALPHA - D614G BR2	2	0.214885	0.00369865	0.055556	0.0316782	0.140554	0.0950346	0.00937028	0.00633564	Not corrected	0.0907764	0	Non significant
SARS-CoV-2	664	682	IPIGAGICASYQTQTNSPA	16	ALPHA - D614G BR2	2	0.214703	0.00299468	0.045472	0.0328849	-0.00270103	0.0986548	-0.000168814	0.00616593	Not corrected	0.970363	0	Non significant
SARS-CoV-2	685	691	ASQSIIA	6	ALPHA - D614G BR2	2	0.157924	0.00340489	-0.0398953	0.0654645	-0.0246538	0.0654645	-0.00410896	0.0109107	Not corrected	0.620393	0	Non significant
SARS-CoV-2	688	692	SIIAY	4	ALPHA - D614G BR2	2	0.178082	0.00276794	0.0177613	0.0534635	0.0326314	0.0534635	0.00815785	0.0133659	Not corrected	0.456363	0	Non significant
SARS-CoV-2	692	696	YTMSL	4	ALPHA - D614G BR2	2	0.185149	0.0034673	0.0131783	0.0557594	-0.010134	0.0557594	-0.00253349	0.0139399	Not corrected	0.809753	0	Non significant
SARS-CoV-2	716	720	TISVT	4	ALPHA - D614G BR2	2	0.1422	0.00527057	-0.0352583	0.0110449	-0.0345656	0.0110449	-0.00864141	0.00276124	Not corrected	0.0238518	0	Non significant
SARS-CoV-2	721	727	TEILPVS	5	ALPHA - D614G BR2	2	0.202204	0.00249589	-0.000839167	0.00655381	0.00525413	0.00655381	0.00105083	0.00131076	Not corrected	0.334389	0	Non significant
SARS-CoV-2	721	728	TEILPVSM	6	ALPHA - D614G BR2	2	0.23297	0.00320514	0.052908	0.0172618	0.0493879	0.0172618	0.00823132	0.00287696	Not corrected	0.0349634	0	Non significant
SARS-CoV-2	750	756	LLQYGSF	6	ALPHA - D614G BR2	2	0.199478	0.00347436	-0.142555	0.0710974	-0.12622	0.0710974	-0.0210366	0.0118496	Not corrected	0.109718	0	Non significant
SARS-CoV-2	751	756	LQYGSF	5	ALPHA - D614G BR2	2	0.173468	0.00440048	-0.110364	0.06636	-0.0916193	0.06636	-0.0183239	0.013272	Not corrected	0.1174	0	Non significant
SARS-CoV-2	761	768	NRALTGIA	7	ALPHA - D614G BR2	2	0.166026	0.00276156	-0.144727	0.0242869	-0.132919	0.0242869	-0.0189885	0.00346956	Not corrected	0.00160165	0	Non significant
SARS-CoV-2	767	779	IAVEQDKNTQEVF	12	ALPHA - D614G BR2	2	0.180693	0.00305994	0.037782	0.0350241	0.0285818	0.0700482	0.00238182	0.00583735	Not corrected	0.589333	0	Non significant
SARS-CoV-2	769	779	VEQDKNTQEVF	10	ALPHA - D614G BR2	2	0.159825	0.00337754	0.0289752	0.0171068	0.0226324	0.0342136	0.00226324	0.00342136	Not corrected	0.44387	0	Non significant
SARS-CoV-2	780	793	AQVKQIYKTPPIKD	11	ALPHA - D614G BR2	2	0.159763	0.00320085	-0.0885973	0.111068	-0.18669	0.222135	-0.0169718	0.0201941	Not corrected	0.314665	0	Non significant
SARS-CoV-2	815	819	IEDLL	4	ALPHA - D614G BR2	2	0.213423	0.00332302	0.053345	0.0169473	0.0497678	0.0169473	0.012442	0.00423681	Not corrected	0.0174074	0	Non significant
SARS-CoV-2	818	825	LLFNKVTL	7	ALPHA - D614G BR2	2	0.254587	0.00341915	-0.00897633	0.016112	-0.0517923	0.032224	-0.0073989	0.00460343	Not corrected	0.11912	0	Non significant
SARS-CoV-2	819	825	LFNKVTL	6	ALPHA - D614G BR2	2	0.217956	0.00424317	-0.0699063	0.0572323	-0.197377	0.114465	-0.0328961	0.0190774	Not corrected	0.0910092	0	Non significant
SARS-CoV-2	820	825	FNKVTL	5	ALPHA - D614G BR2	2	0.197473	0.00271433	0.044434	0.0757629	0.0435918	0.0757629	0.00871835	0.0151526	Not corrected	0.464224	0	Non significant
SARS-CoV-2	820	829	FNKVTLADAG	9	ALPHA - D614G BR2	2	0.161719	0.00297789	-0.044275	0.0473642	-0.161329	0.0947284	-0.0179255	0.0105254	Not corrected	0.0799192	0	Non significant
SARS-CoV-2	820	830	FNKVTLADAGF	10	ALPHA - D614G BR2	2	0.220641	0.00387408	-0.0709387	0.0197604	-0.215721	0.0395208	-0.0215721	0.00395208	Not corrected	0.0141803	0	Non significant
SARS-CoV-2	826	830	ADAGF	4	ALPHA - D614G BR2	2	0.118964	0.0051072	-0.00595967	0.0320645	-0.00913876	0.0320645	-0.00228469	0.00801612	Not corrected	0.693799	0	Non significant
SARS-CoV-2	856	862	TVLPPLL	4	ALPHA - D614G BR2	2	0.274748	0.00395694	-0.10765	0.0652015	-0.141869	0.0652015	-0.0354674	0.0163004	Not corrected	0.0653746	0	Non significant
SARS-CoV-2	867	874	IAQYTSAL	7	ALPHA - D614G BR2	2	0.169252	0.00252012	0.0403447	0.0431272	0.0374127	0.0431272	0.00534467	0.00616103	Not corrected	0.263154	0	Non significant
SARS-CoV-2	875	882	LAGTITSG	7	ALPHA - D614G BR2	2	0.137997	0.00569031	0.0122617	0.117287	0.0130161	0.117287	0.00185945	0.0167552	Not corrected	0.87588	0	Non significant
SARS-CoV-2	899	903	MAYRF	4	ALPHA - D614G BR2	2	0.180927	0.00363518	0.014629	0.0326887	-0.00600263	0.0326887	-0.00150066	0.00817217	Not corrected	0.799184	0	Non significant
SARS-CoV-2	899	913	MAYRFNGIGVTQNVL	14	ALPHA - D614G BR2	2	0.239873	0.00411798	0.0348513	0.0289695	0.0259254	0.057939	0.00185181	0.0041385	Not corrected	0.548048	0	Non significant
SARS-CoV-2	900	910	AYRFNGIGVTQ	10	ALPHA - D614G BR2	2	0.181915	0.00433698	0.0699787	0.0838933	0.0752138	0.167787	0.00752138	0.0167787	Not corrected	0.562694	0	Non significant
SARS-CoV-2	900	913	AYRFNGIGVTQNVL	13	ALPHA - D614G BR2	2	0.227908	0.00375759	0.038534	0.0451675	0.0886685	0.0903349	0.00682065	0.00694884	Not corrected	0.269179	0	Non significant
SARS-CoV-2	901	913	YRFNGIGVTQNVL	12	ALPHA - D614G BR2	2	0.2326	0.00303998	0.0601483	0.0409908	0.0803495	0.0819816	0.00669579	0.0068318	Not corrected	0.324184	0	Non significant
SARS-CoV-2	904	913	NGIGVTQNVL	9	ALPHA - D614G BR2	2	0.198074	0.00327626	0.057992	0.0629986	0.0497568	0.0629986	0.00552853	0.00699984	Not corrected	0.356931	0	Non significant
SARS-CoV-2	906	913	IGVTQNVL	7	ALPHA - D614G BR2	2	0.197177	0.00357556	0.083316	0.0236874	0.00684754	0.0236874	0.00097822	0.00338391	Not corrected	0.690668	0	Non significant
SARS-CoV-2	914	919	YENQKL	5	ALPHA - D614G BR2	2	0.130687	0.00566417	-0.005654	0.0139615	-0.0211584	0.0279229	-0.00423167	0.00558458	Not corrected	0.363362	0	Non significant
SARS-CoV-2	920	924	IANQF	4	ALPHA - D614G BR2	2	0.136776	0.0034008	0.046219	0.0196286	0.0212499	0.0196286	0.00531247	0.00490715	Not corrected	0.214736	0	Non significant
SARS-CoV-2	925	935	NSAIGKIQDSL	10	ALPHA - D614G BR2	2	0.192294	0.00225761	-0.0814077	0.044241	-0.192746	0.088482	-0.0192746	0.0088482	Not corrected	0.030862	0	Non significant
SARS-CoV-2	925	947	NSAIGKIQDSLSSTASALGKLQD	22	ALPHA - D614G BR2	2	0.228505	0.00313779	0.142545	0.0585338	0.332711	0.117068	0.0151232	0.00532125	Not corrected	0.0218366	0	Non significant
SARS-CoV-2	928	935	IGKIQDSL	7	ALPHA - D614G BR2	2	0.1779	0.00321267	-0.101746	0.0769156	-0.251016	0.153831	-0.0358594	0.0219759	Not corrected	0.0764042	0	Non significant
SARS-CoV-2	928	942	IGKIQDSLSSTASAL	14	ALPHA - D614G BR2	2	0.199413	0.00344727	0.181874	0.119975	0.386765	0.239951	0.0276261	0.0171393	Not corrected	0.0752158	0	Non significant
SARS-CoV-2	943	958	GKLQDVVNQNAQALNT	15	ALPHA - D614G BR2	2	0.161901	0.00365445	-0.194967	0.10838	-0.390696	0.216759	-0.0260464	0.0144506	Not corrected	0.0569646	0	Non significant
SARS-CoV-2	944	952	KLQDVVNQN	8	ALPHA - D614G BR2	2	0.18124	0.00281123	-0.207796	0.104634	-0.180656	0.104634	-0.0225821	0.0130792	Not corrected	0.107155	0	Non significant
SARS-CoV-2	954	958	QALNT	4	ALPHA - D614G BR2	2	0.115258	0.0128858	-0.123557	0.0749505	-0.100958	0.0749505	-0.0252396	0.0187376	Not corrected	0.171557	0	Non significant
SARS-CoV-2	959	967	LVKQLSSNF	8	ALPHA - D614G BR2	2	0.186804	0.00286795	-0.124279	0.065421	-0.272555	0.130842	-0.0340694	0.0163553	Not corrected	0.0796355	0	Non significant
SARS-CoV-2	959	974	LVKQLSSNFGAISSVL	15	ALPHA - D614G BR2	2	0.265619	0.00463511	-0.397723	0.113075	-0.714096	0.22615	-0.0476064	0.0150767	Not corrected	0.0133713	0	Non significant
SARS-CoV-2	960	967	VKQLSSNF	7	ALPHA - D614G BR2	2	0.16029	0.00235574	-0.0630817	0.0426107	-0.18336	0.0852214	-0.0261943	0.0121745	Not corrected	0.0329761	0	Non significant
SARS-CoV-2	968	974	GAISSVL	6	ALPHA - D614G BR2	2	0.201323	0.00365456	-0.391626	0.0875469	-0.390813	0.0875469	-0.0651355	0.0145912	Not corrected	0.0177775	0	Non significant
SARS-CoV-2	988	993	VQIDRL	5	ALPHA - D614G BR2	2	0.179463	0.00267355	0.0244573	0.0984962	0.00208362	0.0984962	0.000416724	0.0196992	Not corrected	0.976758	0	Non significant
SARS-CoV-2	988	998	VQIDRLITGRL	10	ALPHA - D614G BR2	2	0.235991	0.00378552	-0.0381667	0.0343255	-0.0763602	0.068651	-0.00763602	0.0068651	Not corrected	0.172826	0	Non significant
SARS-CoV-2	990	998	IDRLITGRL	8	ALPHA - D614G BR2	2	0.198355	0.00288335	0.044608	0.0242212	0.0379793	0.0484424	0.00474742	0.0060553	Not corrected	0.3195	0	Non significant
SARS-CoV-2	994	998	ITGRL	4	ALPHA - D614G BR2	2	0.15031	0.00490283	0.0465997	0.044936	0.0101316	0.044936	0.00253291	0.011234	Not corrected	0.761955	0	Non significant
SARS-CoV-2	999	1003	QSLQT	4	ALPHA - D614G BR2	2	0.150785	0.0139797	0.139259	0.0166916	0.132708	0.0166916	0.033177	0.00417291	Not corrected	0.000444506	0	Non significant
SARS-CoV-2	1004	1009	YVTQQL	5	ALPHA - D614G BR2	2	0.146453	0.00290682	0.176548	0.0252762	0.173949	0.0252762	0.0347897	0.00505524	Not corrected	0.00314239	0	Non significant
SARS-CoV-2	1013	1017	AEIRA	4	ALPHA - D614G BR2	2	0.110316	0.010977	0.111992	0.0167655	0.0930223	0.0167655	0.0232556	0.00419137	Not corrected	0.00298153	0	Non significant
SARS-CoV-2	1013	1021	AEIRASANL	8	ALPHA - D614G BR2	2	0.153432	0.00426367	0.247549	0.0701984	0.247548	0.0701984	0.0309434	0.0087748	Not corrected	0.00852055	0	Non significant
SARS-CoV-2	1015	1021	IRASANL	6	ALPHA - D614G BR2	2	0.148599	0.00466065	0.231569	0.0196508	0.245583	0.0196508	0.0409305	0.00327513	Not corrected	4.91177e-05	0	Non significant
SARS-CoV-2	1047	1059	MSFPQSAPHGVVF	10	ALPHA - D614G BR2	2	0.232563	0.00410031	-0.00956467	0.0347985	0.00882137	0.069597	0.000882137	0.0069597	Not corrected	0.907996	0	Non significant
SARS-CoV-2	1087	1092	PREGVF	4	ALPHA - D614G BR2	2	0.167214	0.00309201	0.0733643	0.0214484	0.0406721	0.0214484	0.010168	0.00536211	Not corrected	0.0479597	0	Non significant
SARS-CoV-2	1088	1100	REGVFVSNGTHWF	12	ALPHA - D614G BR2	2	0.215612	0.00415027	0.0769337	0.0776171	0.174374	0.155234	0.0145312	0.0129362	Not corrected	0.228427	0	Non significant
SARS-CoV-2	1106	1114	FYEPQIITT	7	ALPHA - D614G BR2	2	0.199254	0.00306615	0.242908	0.0687917	0.282118	0.0687917	0.0403026	0.00982739	Not corrected	0.0140787	0	Non significant
SARS-CoV-2	1198	1206	QELGKYEQY	8	ALPHA - D614G BR2	2	0.133888	0.00287711	0.0106357	0.140411	0.0119632	0.140411	0.0014954	0.0175513	Not corrected	0.909297	0	Non significant
SARS-CoV-2	1221	1225	GSGYI	4	ALPHA - D614G BR2	2	0.17248	0.00215292	-0.152421	0.0692328	-0.118594	0.0692328	-0.0296484	0.0173082	Not corrected	0.114205	0	Non significant
SARS-CoV-2	1235	1242	YVRKDGEW	7	ALPHA - D614G BR2	2	0.133678	0.00499864	-0.088626	0.0251362	-0.0914035	0.0251362	-0.0130576	0.00359088	Not corrected	0.00889941	0	Non significant
SARS-CoV-2	1243	1247	VLLST	4	ALPHA - D614G BR2	2	0.170414	0.00304371	-0.029237	0.0540881	-0.0104837	0.0540881	-0.00262093	0.013522	Not corrected	0.793013	0	Non significant
SARS-CoV-2	1243	1248	VLLSTF	5	ALPHA - D614G BR2	2	0.230633	0.00357557	-0.0883923	0.0605623	-0.0766098	0.0605623	-0.015322	0.0121125	Not corrected	0.18333	0	Non significant
SARS-CoV-2	306	318	FTVEKGIYQTSNF	12	ALPHA - D614G BR2	2	0.196381	0.00383823	-0.13868	0.0204493	-0.369931	0.0408986	-0.0308276	0.00340822	Not corrected	0.003593	0	Protected
SARS-CoV-2	821	830	NKVTLADAGF	9	ALPHA - D614G BR2	2	0.197178	0.00420606	-0.141349	0.0377754	-0.278473	0.0755507	-0.0309414	0.00839453	Not corrected	0.00525576	0	Protected
SARS-CoV-2	920	935	IANQFNSAIGKIQDSL	15	ALPHA - D614G BR2	2	0.231128	0.0045621	-0.135443	0.0231675	-0.276093	0.046335	-0.0184062	0.003089	Not corrected	0.00333749	0	Protected
SARS-CoV-2	93	103	ASTEKSNIIRG	10	ALPHA - D614G BR2	2	0.148871	0.00368958	0.313688	0.0369045	0.626963	0.0738089	0.0626963	0.00738089	Not corrected	0.00291079	0	Deprotected
SARS-CoV-2	180	191	EGKQGNFKNLRE	11	ALPHA - D614G BR2	2	0.127996	0.00588186	0.385743	0.0743514	0.724069	0.148703	0.0658245	0.0135184	Not corrected	0.0092767	0	Deprotected
SARS-CoV-2	200	212	YFKIYSKHTPINL	11	ALPHA - D614G BR2	2	0.212575	0.00375495	0.153115	0.0208798	0.449302	0.0626393	0.0408456	0.00569448	Not corrected	0.0077207	0	Deprotected
SARS-CoV-2	201	212	FKIYSKHTPINL	10	ALPHA - D614G BR2	2	0.204744	0.00367334	0.193034	0.0263786	0.540742	0.0791357	0.0540742	0.00791357	Not corrected	0.0079683	0	Deprotected
SARS-CoV-2	213	220	VRDLPQGF	6	ALPHA - D614G BR2	2	0.182287	0.00228307	0.237337	0.0309799	0.436062	0.0619599	0.0726771	0.0103266	Not corrected	0.00046572	0	Deprotected
SARS-CoV-2	291	303	CALDPLSETKCTL	11	ALPHA - D614G BR2	2	0.23533	0.00316963	0.181505	0.0463811	0.365835	0.0927621	0.0332577	0.00843292	Not corrected	0.00967222	0	Deprotected
SARS-CoV-2	407	421	VRQIAPGQTGKIADY	13	ALPHA - D614G BR2	2	0.158581	0.0047691	0.0932793	0.0142964	0.295222	0.0428891	0.0227094	0.00329916	Not corrected	0.000527608	0	Deprotected
SARS-CoV-2	627	633	DQLTPTW	5	ALPHA - D614G BR2	2	0.180174	0.00324193	0.569839	0.0655455	0.569944	0.0655455	0.113989	0.0131091	Not corrected	0.00119044	0	Deprotected
SARS-CoV-2	634	643	RVYSTGSNVF	9	ALPHA - D614G BR2	2	0.171322	0.00331177	0.36883	0.0648881	0.337557	0.0648881	0.0375064	0.00720979	Not corrected	0.00174919	0	Deprotected
SARS-CoV-2	936	942	SSTASAL	6	ALPHA - D614G BR2	2	0.131714	0.00519877	0.278897	0.0556999	0.261596	0.0556999	0.0435994	0.00928331	Not corrected	0.00313026	0	Deprotected
SARS-CoV-2	32	42	FTRGVYYPDKV	9	ALPHA - D614G BR2	10	0.168861	0.00296967	0.032995	0.0480667	0.0278122	0.0961335	0.00309024	0.0106815	Not corrected	0.703076	0	Non significant
SARS-CoV-2	32	43	FTRGVYYPDKVF	10	ALPHA - D614G BR2	10	0.206995	0.00267239	-0.00504633	0.0373533	-0.0773625	0.11206	-0.00773625	0.011206	Not corrected	0.400642	0	Non significant
SARS-CoV-2	32	48	FTRGVYYPDKVFRSSVL	15	ALPHA - D614G BR2	10	0.223443	0.00411613	-0.032224	0.0265519	-0.226581	0.106207	-0.0151054	0.0070805	Not corrected	0.0746581	0	Non significant
SARS-CoV-2	49	54	HSTQDL	5	ALPHA - D614G BR2	10	0.089713	0.0127701	0.052523	0.0184166	0.0219603	0.0184166	0.00439206	0.00368333	Not corrected	0.148628	0	Non significant
SARS-CoV-2	49	55	HSTQDLF	6	ALPHA - D614G BR2	10	0.184705	0.00205833	0.0262513	0.0313407	0.0383674	0.0313407	0.00639457	0.00522345	Not corrected	0.143254	0	Non significant
SARS-CoV-2	49	56	HSTQDLFL	7	ALPHA - D614G BR2	10	0.228009	0.00320113	-0.0407363	0.0280828	-0.0967198	0.0280828	-0.0138171	0.00401184	Not corrected	0.00871746	0	Non significant
SARS-CoV-2	85	91	PFNDGVY	5	ALPHA - D614G BR2	10	0.146568	0.00272902	0.19613	0.0355807	0.190056	0.0355807	0.0380112	0.00711614	Not corrected	0.00295649	0	Non significant
SARS-CoV-2	92	106	FASTEKSNIIRGWIF	14	ALPHA - D614G BR2	10	0.278357	0.0048496	0.047944	0.015142	0.20826	0.0454259	0.0148757	0.00324471	Not corrected	0.0105372	0	Non significant
SARS-CoV-2	104	110	WIFGTTL	6	ALPHA - D614G BR2	10	0.269323	0.00553102	0.105334	0.101489	0.122609	0.101489	0.0204348	0.0169149	Not corrected	0.144645	0	Non significant
SARS-CoV-2	111	117	DSKTQSL	6	ALPHA - D614G BR2	10	0.137096	0.01893	0.0155253	0.023925	-0.0034497	0.023925	-0.00057495	0.0039875	Not corrected	0.842317	0	Non significant
SARS-CoV-2	111	118	DSKTQSLL	7	ALPHA - D614G BR2	10	0.167927	0.00195035	-0.0217553	0.0367588	-0.196562	0.0735176	-0.0280803	0.0105025	Not corrected	0.0160018	0	Non significant
SARS-CoV-2	177	186	MDLEGKQGNF	9	ALPHA - D614G BR2	10	0.162744	0.00219598	0.159916	0.0810965	0.276218	0.162193	0.0306909	0.0180214	Not corrected	0.115859	0	Non significant
SARS-CoV-2	192	199	FVFKNIDG	7	ALPHA - D614G BR2	10	0.189968	0.00288944	-0.0388448	0.0364176	-0.0495544	0.0728351	-0.00707919	0.010405	Not corrected	0.395435	0	Non significant
SARS-CoV-2	192	200	FVFKNIDGY	8	ALPHA - D614G BR2	10	0.200356	0.00322326	-0.00541633	0.0176414	-0.017256	0.0352828	-0.00215701	0.00441035	Not corrected	0.538702	0	Non significant
SARS-CoV-2	192	201	FVFKNIDGYF	9	ALPHA - D614G BR2	10	0.241007	0.00575119	-0.0765447	0.0137027	-0.19359	0.0274054	-0.02151	0.00304505	Not corrected	0.000658754	0	Non significant
SARS-CoV-2	195	201	KNIDGYF	6	ALPHA - D614G BR2	10	0.17966	0.00369313	-0.00934433	0.0847836	-0.0680902	0.0847836	-0.0113484	0.0141306	Not corrected	0.312318	0	Non significant
SARS-CoV-2	200	212	YFKIYSKHTPINL	11	ALPHA - D614G BR2	10	0.208185	0.00343602	0.0311353	0.0224048	0.0833637	0.0672145	0.00757852	0.00611041	Not corrected	0.197417	0	Non significant
SARS-CoV-2	201	212	FKIYSKHTPINL	10	ALPHA - D614G BR2	10	0.201092	0.00264861	0.0818503	0.0368865	0.207192	0.110659	0.0207192	0.0110659	Not corrected	0.100116	0	Non significant
SARS-CoV-2	202	212	KIYSKHTPINL	9	ALPHA - D614G BR2	10	0.185193	0.00379893	0.0552153	0.0314829	0.0559588	0.0629657	0.00621765	0.00699619	Not corrected	0.277988	0	Non significant
SARS-CoV-2	243	264	ALHRSYLTPGDSSSGWTAGAAA	20	ALPHA - D614G BR2	10	0.172708	0.00354903	-0.102146	0.0356772	-0.302475	0.107031	-0.0151238	0.00535157	Not corrected	0.0311357	0	Non significant
SARS-CoV-2	245	264	HRSYLTPGDSSSGWTAGAAA	18	ALPHA - D614G BR2	10	0.171559	0.00336589	0.0386097	0.142046	0.0883441	0.284091	0.00490801	0.0157829	Not corrected	0.686707	0	Non significant
SARS-CoV-2	245	265	HRSYLTPGDSSSGWTAGAAAY	19	ALPHA - D614G BR2	10	0.185361	0.00289094	-0.0447483	0.0446599	-0.156395	0.13398	-0.00823133	0.00705157	Not corrected	0.196448	0	Non significant
SARS-CoV-2	265	276	YYVGYLQPRTFL	10	ALPHA - D614G BR2	10	0.258605	0.00488787	-0.0227067	0.0266947	-0.0268951	0.0533893	-0.00268951	0.00533893	Not corrected	0.500748	0	Non significant
SARS-CoV-2	266	276	YVGYLQPRTFL	9	ALPHA - D614G BR2	10	0.250797	0.0049947	-0.028495	0.0123787	-0.121644	0.0247575	-0.013516	0.00275083	Not corrected	0.0022147	0	Non significant
SARS-CoV-2	267	276	VGYLQPRTFL	8	ALPHA - D614G BR2	10	0.245213	0.00408534	0.010833	0.0419129	-0.084253	0.0838258	-0.0105316	0.0104782	Not corrected	0.244079	0	Non significant
SARS-CoV-2	269	276	YLQPRTFL	6	ALPHA - D614G BR2	10	0.228289	0.00423938	0.00429567	0.027965	-0.00830295	0.05593	-0.00138382	0.00932167	Not corrected	0.84032	0	Non significant
SARS-CoV-2	291	303	CALDPLSETKCTL	11	ALPHA - D614G BR2	10	0.232789	0.00385312	0.0221897	0.0631546	0.0472034	0.126309	0.00429122	0.0114826	Not corrected	0.629154	0	Non significant
SARS-CoV-2	306	313	FTVEKGIY	7	ALPHA - D614G BR2	10	0.176385	0.00316956	0.0145127	0.0311908	-0.00981785	0.0623816	-0.00140255	0.00891165	Not corrected	0.828862	0	Non significant
SARS-CoV-2	306	317	FTVEKGIYQTSN	11	ALPHA - D614G BR2	10	0.158964	0.00276561	-0.043567	0.0345209	-0.0867344	0.0690417	-0.00788495	0.00627652	Not corrected	0.132943	0	Non significant
SARS-CoV-2	314	318	QTSNF	4	ALPHA - D614G BR2	10	0.102748	0.00266306	-0.222687	0.0277308	-0.230519	0.0277308	-0.0576298	0.00693269	Not corrected	0.00532239	0	Non significant
SARS-CoV-2	369	374	YNSASF	5	ALPHA - D614G BR2	10	0.122785	0.00087373	0.182291	0.0818499	0.19773	0.0818499	0.0395461	0.01637	Not corrected	0.0496082	0	Non significant
SARS-CoV-2	388	392	NDLCF	4	ALPHA - D614G BR2	10	0.191921	0.00355347	0.171846	0.0858659	0.200736	0.0858659	0.050184	0.0214665	Not corrected	0.0258174	0	Non significant
SARS-CoV-2	396	400	YADSF	4	ALPHA - D614G BR2	10	0.132232	0.00252564	0.0927023	0.0365595	0.047904	0.0365595	0.011976	0.00913987	Not corrected	0.123022	0	Non significant
SARS-CoV-2	400	406	FVIRGDE	6	ALPHA - D614G BR2	10	0.14857	0.00292477	-0.0786837	0.0492147	-0.179689	0.0984294	-0.0299481	0.0164049	Not corrected	0.110226	0	Non significant
SARS-CoV-2	401	420	VIRGDEVRQIAPGQTGKIAD	18	ALPHA - D614G BR2	10	0.151651	0.0033622	-0.0816477	0.0955161	-0.353671	0.286548	-0.0196484	0.0159193	Not corrected	0.144509	0	Non significant
SARS-CoV-2	401	421	VIRGDEVRQIAPGQTGKIADY	19	ALPHA - D614G BR2	10	0.16779	0.0036549	-0.0912667	0.097716	-0.231292	0.293148	-0.0121733	0.0154288	Not corrected	0.319495	0	Non significant
SARS-CoV-2	407	420	VRQIAPGQTGKIAD	12	ALPHA - D614G BR2	10	0.139871	0.00606553	0.090564	0.0346632	0.143939	0.0693265	0.011995	0.00577721	Not corrected	0.0888158	0	Non significant
SARS-CoV-2	407	421	VRQIAPGQTGKIADY	13	ALPHA - D614G BR2	10	0.157601	0.00250285	0.0714595	0.0225261	0.229763	0.0675782	0.0176741	0.00519832	Not corrected	0.0342059	0	Non significant
SARS-CoV-2	407	422	VRQIAPGQTGKIADYN	14	ALPHA - D614G BR2	10	0.145589	0.00258945	0.0423207	0.0428215	0.0920994	0.085643	0.00657853	0.00611736	Not corrected	0.24029	0	Non significant
SARS-CoV-2	421	429	YNYKLPDDF	7	ALPHA - D614G BR2	10	0.200812	0.00357992	0.113499	0.041691	0.172815	0.083382	0.0246878	0.0119117	Not corrected	0.0400011	0	Non significant
SARS-CoV-2	422	429	NYKLPDDF	6	ALPHA - D614G BR2	10	0.193068	0.00738606	0.0369887	0.0429879	0.0211879	0.0859758	0.00353131	0.0143293	Not corrected	0.746837	0	Non significant
SARS-CoV-2	423	429	YKLPDDF	5	ALPHA - D614G BR2	10	0.194685	0.00361908	0.0316693	0.0239686	-0.004582	0.0479372	-0.0009164	0.00958744	Not corrected	0.897965	0	Non significant
SARS-CoV-2	442	452	DSKVGGNYNYL	10	ALPHA - D614G BR2	10	0.16576	0.00394362	0.118478	0.0598917	0.200721	0.119783	0.0200721	0.0119783	Not corrected	0.109413	0	Non significant
SARS-CoV-2	444	452	KVGGNYNYL	8	ALPHA - D614G BR2	10	0.175202	0.00395009	-0.114301	0.0915634	-0.269187	0.183127	-0.0336483	0.0228908	Not corrected	0.0966163	0	Non significant
SARS-CoV-2	456	467	FRKSNLKPFERD	10	ALPHA - D614G BR2	10	0.14026	0.00219288	-0.0713357	0.0346407	-0.180042	0.0692814	-0.0180042	0.00692814	Not corrected	0.0573327	0	Non significant
SARS-CoV-2	456	470	FRKSNLKPFERDIST	13	ALPHA - D614G BR2	10	0.164806	0.00443161	-0.0376413	0.0440848	-0.148172	0.176339	-0.0113979	0.0135646	Not corrected	0.325738	0	Non significant
SARS-CoV-2	456	471	FRKSNLKPFERDISTE	14	ALPHA - D614G BR2	10	0.157357	0.00258715	-0.0609557	0.0358467	-0.35974	0.10754	-0.0256957	0.00768145	Not corrected	0.0142606	0	Non significant
SARS-CoV-2	497	505	FQPTNGVGY	7	ALPHA - D614G BR2	10	0.230146	0.00522028	0.0822647	0.0822121	0.0841618	0.0822121	0.0120231	0.0117446	Not corrected	0.241712	0	Non significant
SARS-CoV-2	511	515	VVLSF	4	ALPHA - D614G BR2	10	0.222724	0.00415278	0.0190703	0.00891088	0.0105384	0.00891088	0.0026346	0.00222772	Not corrected	0.163031	0	Non significant
SARS-CoV-2	542	552	NFNGLTGTGVL	10	ALPHA - D614G BR2	10	0.217103	0.00399209	0.125967	0.0162874	0.124872	0.0162874	0.0124872	0.00162874	Not corrected	0.00489443	0	Non significant
SARS-CoV-2	544	552	NGLTGTGVL	8	ALPHA - D614G BR2	10	0.19376	0.0032529	0.0272367	0.0327194	0.0180693	0.0327194	0.00225866	0.00408993	Not corrected	0.458521	0	Non significant
SARS-CoV-2	553	565	TESNKKFLPFQQF	11	ALPHA - D614G BR2	10	0.243107	0.00414281	-0.0758877	0.017439	-0.110752	0.0348779	-0.0100684	0.00317072	Not corrected	0.00954364	0	Non significant
SARS-CoV-2	575	582	AVRDPQTL	6	ALPHA - D614G BR2	10	0.1306	0.00205342	0.00501933	0.0319075	-0.0723424	0.063815	-0.0120571	0.0106358	Not corrected	0.168485	0	Non significant
SARS-CoV-2	575	583	AVRDPQTLE	7	ALPHA - D614G BR2	10	0.127671	0.00347648	-0.000879	0.0246053	-0.0560093	0.0492106	-0.00800133	0.00703008	Not corrected	0.180815	0	Non significant
SARS-CoV-2	576	582	VRDPQTL	5	ALPHA - D614G BR2	10	0.133464	0.00244378	-0.0924323	0.0437678	-0.120614	0.0437678	-0.0241228	0.00875355	Not corrected	0.0294838	0	Non significant
SARS-CoV-2	605	621	SNQVAVLYQGVNCTEVP	15	ALPHA - D614G BR2	10	0.210742	0.00496173	0.101117	0.0298059	0.277238	0.0894176	0.0184825	0.00596117	Not corrected	0.0105603	0	Non significant
SARS-CoV-2	634	643	RVYSTGSNVF	9	ALPHA - D614G BR2	10	0.167876	0.00313877	0.14454	0.109421	0.113267	0.109421	0.0125853	0.0121579	Not corrected	0.260189	0	Non significant
SARS-CoV-2	664	682	IPIGAGICASYQTQTNSPA	16	ALPHA - D614G BR2	10	0.212214	0.00365575	0.023259	0.0284892	-0.06934	0.0854677	-0.00433375	0.00534173	Not corrected	0.330837	0	Non significant
SARS-CoV-2	685	691	ASQSIIA	6	ALPHA - D614G BR2	10	0.154208	0.00225519	0.0463323	0.0554468	0.0615739	0.0554468	0.0102623	0.00924113	Not corrected	0.192628	0	Non significant
SARS-CoV-2	688	692	SIIAY	4	ALPHA - D614G BR2	10	0.175651	0.00220017	0.0639887	0.112647	0.0788588	0.112647	0.0197147	0.0281617	Not corrected	0.397047	0	Non significant
SARS-CoV-2	692	696	YTMSL	4	ALPHA - D614G BR2	10	0.182686	0.00322802	-0.0984717	0.0283241	-0.121784	0.0283241	-0.030446	0.00708102	Not corrected	0.018387	0	Non significant
SARS-CoV-2	716	720	TISVT	4	ALPHA - D614G BR2	10	0.137041	0.00312719	-0.0294713	0.0147488	-0.0287786	0.0147488	-0.00719466	0.00368719	Not corrected	0.0431069	0	Non significant
SARS-CoV-2	721	727	TEILPVS	5	ALPHA - D614G BR2	10	0.200824	0.00311718	-0.012668	0.0669218	-0.0065747	0.0669218	-0.00131494	0.0133844	Not corrected	0.896026	0	Non significant
SARS-CoV-2	721	728	TEILPVSM	6	ALPHA - D614G BR2	10	0.230985	0.00372601	-0.0138563	0.0272813	-0.0173764	0.0272813	-0.00289607	0.00454688	Not corrected	0.405869	0	Non significant
SARS-CoV-2	750	756	LLQYGSF	6	ALPHA - D614G BR2	10	0.197107	0.00387211	-0.126636	0.0358619	-0.110301	0.0358619	-0.0183835	0.00597699	Not corrected	0.014863	0	Non significant
SARS-CoV-2	751	756	LQYGSF	5	ALPHA - D614G BR2	10	0.16753	0.00368425	-0.043399	0.042173	-0.024654	0.042173	-0.00493079	0.0084346	Not corrected	0.432218	0	Non significant
SARS-CoV-2	761	768	NRALTGIA	7	ALPHA - D614G BR2	10	0.160481	0.0014927	-0.257013	0.0624533	-0.245205	0.0624533	-0.0350293	0.00892191	Not corrected	0.00698774	0	Non significant
SARS-CoV-2	767	779	IAVEQDKNTQEVF	12	ALPHA - D614G BR2	10	0.177953	0.00271809	-0.011351	0.035082	-0.0696842	0.070164	-0.00580702	0.005847	Not corrected	0.25976	0	Non significant
SARS-CoV-2	769	779	VEQDKNTQEVF	10	ALPHA - D614G BR2	10	0.155814	0.00327577	-0.0228103	0.0261079	-0.0809386	0.0522158	-0.00809386	0.00522158	Not corrected	0.0806831	0	Non significant
SARS-CoV-2	780	793	AQVKQIYKTPPIKD	11	ALPHA - D614G BR2	10	0.155709	0.00310262	-0.0870653	0.0674262	-0.183626	0.134852	-0.0166933	0.0122593	Not corrected	0.154377	0	Non significant
SARS-CoV-2	815	819	IEDLL	4	ALPHA - D614G BR2	10	0.210105	0.00372682	0.0248387	0.0209482	0.0212615	0.0209482	0.00531538	0.00523705	Not corrected	0.228286	0	Non significant
SARS-CoV-2	818	825	LLFNKVTL	7	ALPHA - D614G BR2	10	0.250325	0.00477992	-0.00570033	0.0281739	-0.0452403	0.0563478	-0.0064629	0.00804969	Not corrected	0.337165	0	Non significant
SARS-CoV-2	820	825	FNKVTL	5	ALPHA - D614G BR2	10	0.193824	0.00328342	-0.0227147	0.069294	-0.0235569	0.069294	-0.00471138	0.0138588	Not corrected	0.653096	0	Non significant
SARS-CoV-2	820	829	FNKVTLADAG	9	ALPHA - D614G BR2	10	0.161276	0.00260708	-0.142767	0.0394408	-0.358313	0.0788816	-0.0398126	0.00876462	Not corrected	0.0102801	0	Non significant
SARS-CoV-2	826	830	ADAGF	4	ALPHA - D614G BR2	10	0.115804	0.00256036	-0.039724	0.0210443	-0.0429031	0.0210443	-0.0107258	0.00526107	Not corrected	0.066043	0	Non significant
SARS-CoV-2	867	874	IAQYTSAL	7	ALPHA - D614G BR2	10	0.168056	0.00260151	0.057167	0.0820572	0.054235	0.0820572	0.00774786	0.0117225	Not corrected	0.418347	0	Non significant
SARS-CoV-2	875	882	LAGTITSG	7	ALPHA - D614G BR2	10	0.1327	0.00295472	0.095071	0.14463	0.0958255	0.14463	0.0136894	0.0206614	Not corrected	0.39689	0	Non significant
SARS-CoV-2	899	903	MAYRF	4	ALPHA - D614G BR2	10	0.175536	0.00296985	0.0295913	0.0259386	0.0089597	0.0259386	0.00223993	0.00648464	Not corrected	0.641666	0	Non significant
SARS-CoV-2	899	913	MAYRFNGIGVTQNVL	14	ALPHA - D614G BR2	10	0.237291	0.00481513	0.13603	0.0694623	0.228283	0.138925	0.016306	0.00992318	Not corrected	0.112819	0	Non significant
SARS-CoV-2	900	910	AYRFNGIGVTQ	10	ALPHA - D614G BR2	10	0.17995	0.00237803	-0.00917733	0.15195	-0.0830982	0.303901	-0.00830982	0.0303901	Not corrected	0.719087	0	Non significant
SARS-CoV-2	900	913	AYRFNGIGVTQNVL	13	ALPHA - D614G BR2	10	0.224811	0.00393027	0.00814833	0.0633977	0.0278971	0.126795	0.00214593	0.00975349	Not corrected	0.762315	0	Non significant
SARS-CoV-2	901	913	YRFNGIGVTQNVL	12	ALPHA - D614G BR2	10	0.227064	0.00345021	0.046268	0.0480029	0.0525888	0.0960059	0.0043824	0.00800049	Not corrected	0.468323	0	Non significant
SARS-CoV-2	904	913	NGIGVTQNVL	9	ALPHA - D614G BR2	10	0.195927	0.00302207	-0.0418917	0.120061	-0.0501269	0.120061	-0.00556965	0.0133401	Not corrected	0.571436	0	Non significant
SARS-CoV-2	906	913	IGVTQNVL	7	ALPHA - D614G BR2	10	0.193531	0.00258563	0.0722587	0.067306	-0.00420979	0.067306	-0.000601399	0.00961514	Not corrected	0.929949	0	Non significant
SARS-CoV-2	914	919	YENQKL	5	ALPHA - D614G BR2	10	0.130463	0.0129965	-0.018036	0.024837	-0.0459224	0.049674	-0.00918447	0.00993481	Not corrected	0.251026	0	Non significant
SARS-CoV-2	920	924	IANQF	4	ALPHA - D614G BR2	10	0.1345	0.00105538	0.0361707	0.0253537	0.0112015	0.0253537	0.00280038	0.00633841	Not corrected	0.560247	0	Non significant
SARS-CoV-2	920	935	IANQFNSAIGKIQDSL	15	ALPHA - D614G BR2	10	0.228378	0.00609318	-0.103857	0.061874	-0.212921	0.123748	-0.0141947	0.00824987	Not corrected	0.061324	0	Non significant
SARS-CoV-2	925	935	NSAIGKIQDSL	10	ALPHA - D614G BR2	10	0.189064	0.0019632	-0.11541	0.0368494	-0.26075	0.0736988	-0.026075	0.00736988	Not corrected	0.0136229	0	Non significant
SARS-CoV-2	925	947	NSAIGKIQDSLSSTASALGKLQD	22	ALPHA - D614G BR2	10	0.224725	0.00497993	0.100612	0.0857211	0.248845	0.171442	0.0113111	0.00779283	Not corrected	0.0985558	0	Non significant
SARS-CoV-2	928	935	IGKIQDSL	7	ALPHA - D614G BR2	10	0.174346	0.00313859	-0.205828	0.0952287	-0.459181	0.190457	-0.0655973	0.0272082	Not corrected	0.0290246	0	Non significant
SARS-CoV-2	928	942	IGKIQDSLSSTASAL	14	ALPHA - D614G BR2	10	0.196724	0.0026644	0.00704567	0.0999537	0.0371088	0.199907	0.00265063	0.0142791	Not corrected	0.800526	0	Non significant
SARS-CoV-2	936	942	SSTASAL	6	ALPHA - D614G BR2	10	0.12428	0.0034763	0.309656	0.0548742	0.292355	0.0548742	0.0487258	0.0091457	Not corrected	0.0142589	0	Non significant
SARS-CoV-2	943	958	GKLQDVVNQNAQALNT	15	ALPHA - D614G BR2	10	0.158262	0.0026769	-0.104402	0.0250302	-0.209566	0.0500604	-0.0139711	0.00333736	Not corrected	0.0209577	0	Non significant
SARS-CoV-2	944	952	KLQDVVNQN	8	ALPHA - D614G BR2	10	0.178613	0.00360806	-0.268515	0.0494854	-0.241375	0.0494854	-0.0301719	0.00618567	Not corrected	0.00561593	0	Non significant
SARS-CoV-2	954	958	QALNT	4	ALPHA - D614G BR2	10	0.101301	0.0157679	-0.049716	0.0370482	-0.027117	0.0370482	-0.00677924	0.00926204	Not corrected	0.356816	0	Non significant
SARS-CoV-2	959	967	LVKQLSSNF	8	ALPHA - D614G BR2	10	0.182246	0.00309834	-0.155308	0.0315932	-0.334613	0.0631863	-0.0418267	0.00789829	Not corrected	0.0126002	0	Non significant
SARS-CoV-2	960	967	VKQLSSNF	7	ALPHA - D614G BR2	10	0.159732	0.00284106	-0.147098	0.062115	-0.351392	0.12423	-0.0501989	0.0177472	Not corrected	0.0211146	0	Non significant
SARS-CoV-2	988	993	VQIDRL	5	ALPHA - D614G BR2	10	0.175534	0.00240588	-0.0543813	0.0681752	-0.076755	0.0681752	-0.015351	0.013635	Not corrected	0.229112	0	Non significant
SARS-CoV-2	988	998	VQIDRLITGRL	10	ALPHA - D614G BR2	10	0.230713	0.00543043	-0.124793	0.0632391	-0.249614	0.126478	-0.0249614	0.0126478	Not corrected	0.0599358	0	Non significant
SARS-CoV-2	990	998	IDRLITGRL	8	ALPHA - D614G BR2	10	0.193163	0.00341536	0.137136	0.0528264	0.223035	0.105653	0.0278793	0.0132066	Not corrected	0.0347403	0	Non significant
SARS-CoV-2	994	998	ITGRL	4	ALPHA - D614G BR2	10	0.143956	0.00297265	0.0815893	0.044606	0.0451213	0.044606	0.0112803	0.0111515	Not corrected	0.241237	0	Non significant
SARS-CoV-2	999	1003	QSLQT	4	ALPHA - D614G BR2	10	0.136726	0.0257114	0.148474	0.0114445	0.141923	0.0114445	0.0354808	0.00286112	Not corrected	0.000466867	0	Non significant
SARS-CoV-2	1004	1009	YVTQQL	5	ALPHA - D614G BR2	10	0.14444	0.00219921	0.153792	0.0217662	0.151192	0.0217662	0.0302385	0.00435324	Not corrected	0.00112859	0	Non significant
SARS-CoV-2	1013	1017	AEIRA	4	ALPHA - D614G BR2	10	0.10315	0.0174492	0.192781	0.0262697	0.173811	0.0262697	0.0434528	0.00656742	Not corrected	0.00433495	0	Non significant
SARS-CoV-2	1013	1021	AEIRASANL	8	ALPHA - D614G BR2	10	0.149522	0.00208887	0.258358	0.0597656	0.258357	0.0597656	0.0322946	0.0074707	Not corrected	0.00574016	0	Non significant
SARS-CoV-2	1015	1021	IRASANL	6	ALPHA - D614G BR2	10	0.144239	0.00178415	0.220422	0.0335163	0.234436	0.0335163	0.0390726	0.00558605	Not corrected	0.00851325	0	Non significant
SARS-CoV-2	1047	1059	MSFPQSAPHGVVF	10	ALPHA - D614G BR2	10	0.231153	0.0044094	-0.00110433	0.0331153	0.025742	0.0662306	0.0025742	0.00662306	Not corrected	0.604166	0	Non significant
SARS-CoV-2	1087	1092	PREGVF	4	ALPHA - D614G BR2	10	0.162247	0.00191144	0.0277363	0.0161776	-0.00495586	0.0161776	-0.00123896	0.0040444	Not corrected	0.68122	0	Non significant
SARS-CoV-2	1088	1100	REGVFVSNGTHWF	12	ALPHA - D614G BR2	10	0.211209	0.00371678	-0.013007	0.00667434	-0.00550695	0.0133487	-0.000458912	0.00111239	Not corrected	0.570521	0	Non significant
SARS-CoV-2	1106	1114	FYEPQIITT	7	ALPHA - D614G BR2	10	0.196685	0.00245079	0.170924	0.142877	0.210134	0.142877	0.0300192	0.020411	Not corrected	0.343675	0	Non significant
SARS-CoV-2	1198	1206	QELGKYEQY	8	ALPHA - D614G BR2	10	0.130642	0.00273041	-0.146887	0.0599792	-0.14556	0.0599792	-0.018195	0.0074974	Not corrected	0.0435295	0	Non significant
SARS-CoV-2	1235	1242	YVRKDGEW	7	ALPHA - D614G BR2	10	0.1281	0.00268272	-0.118423	0.0342891	-0.121201	0.0342891	-0.0173144	0.00489844	Not corrected	0.00662902	0	Non significant
SARS-CoV-2	1243	1247	VLLST	4	ALPHA - D614G BR2	10	0.168194	0.00187798	-0.136141	0.0108964	-0.117387	0.0108964	-0.0293468	0.0027241	Not corrected	0.000244056	0	Non significant
SARS-CoV-2	1243	1248	VLLSTF	5	ALPHA - D614G BR2	10	0.227636	0.00463802	-0.227531	0.118298	-0.215748	0.118298	-0.0431496	0.0236597	Not corrected	0.0978128	0	Non significant
SARS-CoV-2	306	318	FTVEKGIYQTSNF	12	ALPHA - D614G BR2	10	0.192376	0.00338595	-0.230424	0.0381803	-0.55342	0.0763606	-0.0461183	0.00636339	Not corrected	0.00263679	0	Protected
SARS-CoV-2	310	318	KGIYQTSNF	8	ALPHA - D614G BR2	10	0.157226	0.00324851	-0.235344	0.0519065	-0.492594	0.103813	-0.0615743	0.0129766	Not corrected	0.00498346	0	Protected
SARS-CoV-2	318	325	FRVQPTES	6	ALPHA - D614G BR2	10	0.133825	0.00151925	-0.282871	0.0335725	-0.272687	0.0335725	-0.0454478	0.00559542	Not corrected	0.000698297	0	Protected
SARS-CoV-2	453	467	YRLFRKSNLKPFERD	13	ALPHA - D614G BR2	10	0.161503	0.00414532	-0.0620997	0.0101517	-0.263452	0.0406069	-0.0202656	0.00312361	Not corrected	0.00149497	0	Protected
SARS-CoV-2	553	568	TESNKKFLPFQQFGRD	14	ALPHA - D614G BR2	10	0.210374	0.00446317	-0.0941753	0.0201051	-0.405666	0.0603153	-0.0289761	0.00430824	Not corrected	0.00917503	0	Protected
SARS-CoV-2	819	825	LFNKVTL	6	ALPHA - D614G BR2	10	0.215376	0.00384326	-0.130893	0.0279089	-0.319349	0.0558179	-0.0532249	0.00930298	Not corrected	0.00246881	0	Protected
SARS-CoV-2	820	830	FNKVTLADAGF	10	ALPHA - D614G BR2	10	0.218091	0.00360072	-0.119382	0.0311961	-0.312607	0.0623922	-0.0312607	0.00623922	Not corrected	0.00872979	0	Protected
SARS-CoV-2	821	830	NKVTLADAGF	9	ALPHA - D614G BR2	10	0.193445	0.00279162	-0.162019	0.0364346	-0.319814	0.0728692	-0.0355349	0.00809658	Not corrected	0.00384189	0	Protected
SARS-CoV-2	856	862	TVLPPLL	4	ALPHA - D614G BR2	10	0.27078	0.0058525	-0.348849	0.0252968	-0.383068	0.0252968	-0.0957671	0.0063242	Not corrected	8.50178e-05	0	Protected
SARS-CoV-2	959	974	LVKQLSSNFGAISSVL	15	ALPHA - D614G BR2	10	0.264372	0.00474872	-0.449393	0.0479358	-0.817437	0.0958716	-0.0544958	0.00639144	Not corrected	0.00448353	0	Protected
SARS-CoV-2	968	974	GAISSVL	6	ALPHA - D614G BR2	10	0.20014	0.00295823	-0.4683	0.0597074	-0.467487	0.0597074	-0.0779145	0.00995124	Not corrected	0.00156774	0	Protected
SARS-CoV-2	1221	1225	GSGYI	4	ALPHA - D614G BR2	10	0.17028	0.00155826	-0.387729	0.0505655	-0.353901	0.0505655	-0.0884753	0.0126414	Not corrected	0.00246366	0	Protected
SARS-CoV-2	92	103	FASTEKSNIIRG	11	ALPHA - D614G BR2	10	0.143546	0.00155028	0.299081	0.025892	0.555118	0.051784	0.0504653	0.00470764	Not corrected	0.00291572	0	Deprotected
SARS-CoV-2	93	103	ASTEKSNIIRG	10	ALPHA - D614G BR2	10	0.143436	0.00164495	0.309935	0.0475958	0.619458	0.0951917	0.0619458	0.00951917	Not corrected	0.000637448	0	Deprotected
SARS-CoV-2	94	103	STEKSNIIRG	9	ALPHA - D614G BR2	10	0.142382	0.00172712	0.298302	0.0107531	0.571141	0.0215061	0.0634601	0.00238957	Not corrected	9.99694e-05	0	Deprotected
SARS-CoV-2	177	191	MDLEGKQGNFKNLRE	14	ALPHA - D614G BR2	10	0.148168	0.00382548	0.247795	0.0285438	0.693364	0.0856315	0.049526	0.00611654	Not corrected	0.000267139	0	Deprotected
SARS-CoV-2	180	191	EGKQGNFKNLRE	11	ALPHA - D614G BR2	10	0.126244	0.00772521	0.429646	0.0414454	0.811877	0.0828908	0.073807	0.00753552	Not corrected	0.000218063	0	Deprotected
SARS-CoV-2	213	220	VRDLPQGF	6	ALPHA - D614G BR2	10	0.178456	0.00453593	0.150334	0.0290614	0.262057	0.0581228	0.0436762	0.00968714	Not corrected	0.00343884	0	Deprotected
SARS-CoV-2	586	592	DITPCSF	5	ALPHA - D614G BR2	10	0.184965	0.00404548	0.614448	0.0393926	0.606364	0.0393926	0.121273	0.00787853	Not corrected	0.00137349	0	Deprotected
SARS-CoV-2	627	633	DQLTPTW	5	ALPHA - D614G BR2	10	0.180513	0.00415482	0.484092	0.0254141	0.484198	0.0254141	0.0968396	0.00508283	Not corrected	0.000558143	0	Deprotected
SARS-CoV-2	32	42	FTRGVYYPDKV	9	ALPHA - D614G BR2	30	0.173159	0.00207655	0.0910363	0.0264496	0.143895	0.0528991	0.0159883	0.00587768	Not corrected	0.0410187	0	Non significant
SARS-CoV-2	32	43	FTRGVYYPDKVF	10	ALPHA - D614G BR2	30	0.211241	0.00261752	0.0122963	0.0266857	-0.0253345	0.0800572	-0.00253345	0.00800572	Not corrected	0.675686	0	Non significant
SARS-CoV-2	32	48	FTRGVYYPDKVFRSSVL	15	ALPHA - D614G BR2	30	0.230225	0.00228515	-0.018649	0.00724353	-0.172281	0.0289741	-0.0114854	0.00193161	Not corrected	0.00148141	0	Non significant
SARS-CoV-2	49	54	HSTQDL	5	ALPHA - D614G BR2	30	0.121637	0.0117062	0.0653807	0.0458827	0.034818	0.0458827	0.00696359	0.00917654	Not corrected	0.338249	0	Non significant
SARS-CoV-2	49	55	HSTQDLF	6	ALPHA - D614G BR2	30	0.191826	0.00170031	-0.054512	0.0590579	-0.0423959	0.0590579	-0.00706599	0.00984299	Not corrected	0.377587	0	Non significant
SARS-CoV-2	49	56	HSTQDLFL	7	ALPHA - D614G BR2	30	0.23546	0.00377467	-0.00197	0.0270463	-0.0579534	0.0270463	-0.00827906	0.00386375	Not corrected	0.0821242	0	Non significant
SARS-CoV-2	85	91	PFNDGVY	5	ALPHA - D614G BR2	30	0.151396	0.00155773	-0.0361847	0.0482162	-0.0422589	0.0482162	-0.00845178	0.00964324	Not corrected	0.258939	0	Non significant
SARS-CoV-2	92	106	FASTEKSNIIRGWIF	14	ALPHA - D614G BR2	30	0.28518	0.00297165	-0.0102502	0.0195846	0.0336777	0.0587537	0.00240555	0.00419669	Not corrected	0.494176	0	Non significant
SARS-CoV-2	104	110	WIFGTTL	6	ALPHA - D614G BR2	30	0.273935	0.00336158	-0.0352757	0.154832	-0.0180008	0.154832	-0.00300013	0.0258053	Not corrected	0.875854	0	Non significant
SARS-CoV-2	111	117	DSKTQSL	6	ALPHA - D614G BR2	30	0.182923	0.0148556	0.00251	0.0519938	-0.016465	0.0519938	-0.00274417	0.00866563	Not corrected	0.666438	0	Non significant
SARS-CoV-2	111	118	DSKTQSLL	7	ALPHA - D614G BR2	30	0.17418	0.00158414	0.0366597	0.0235694	-0.079732	0.0471388	-0.0113903	0.00673412	Not corrected	0.113958	0	Non significant
SARS-CoV-2	177	186	MDLEGKQGNF	9	ALPHA - D614G BR2	30	0.166583	0.000695119	0.145115	0.0224903	0.246616	0.0449807	0.0274018	0.00499785	Not corrected	0.00478173	0	Non significant
SARS-CoV-2	192	199	FVFKNIDG	7	ALPHA - D614G BR2	30	0.195045	0.00175852	-0.0451157	0.0433459	-0.062096	0.0866918	-0.00887086	0.0123845	Not corrected	0.38197	0	Non significant
SARS-CoV-2	192	200	FVFKNIDGY	8	ALPHA - D614G BR2	30	0.20477	0.00312735	-0.00527333	0.0205316	-0.01697	0.0410632	-0.00212126	0.00513289	Not corrected	0.58651	0	Non significant
SARS-CoV-2	195	201	KNIDGYF	6	ALPHA - D614G BR2	30	0.186506	0.00318333	-0.0869807	0.0942867	-0.145727	0.0942867	-0.0242878	0.0157145	Not corrected	0.128728	0	Non significant
SARS-CoV-2	200	212	YFKIYSKHTPINL	11	ALPHA - D614G BR2	30	0.214552	0.0036643	0.0323363	0.00786224	0.0869667	0.0235867	0.00790606	0.00214425	Not corrected	0.0214635	0	Non significant
SARS-CoV-2	201	212	FKIYSKHTPINL	10	ALPHA - D614G BR2	30	0.205311	0.00142022	0.049107	0.0397971	0.108962	0.119391	0.0108962	0.0119391	Not corrected	0.303813	0	Non significant
SARS-CoV-2	202	212	KIYSKHTPINL	9	ALPHA - D614G BR2	30	0.18893	0.00422222	0.040368	0.0122924	0.0262642	0.0245847	0.00291824	0.00273163	Not corrected	0.186388	0	Non significant
SARS-CoV-2	213	220	VRDLPQGF	6	ALPHA - D614G BR2	30	0.185193	0.0022499	0.109984	0.0194122	0.181357	0.0388244	0.0302262	0.00647073	Not corrected	0.00218513	0	Non significant
SARS-CoV-2	243	264	ALHRSYLTPGDSSSGWTAGAAA	20	ALPHA - D614G BR2	30	0.178478	0.00321038	-0.071962	0.0237506	-0.211923	0.0712517	-0.0105962	0.00356259	Not corrected	0.0359391	0	Non significant
SARS-CoV-2	245	264	HRSYLTPGDSSSGWTAGAAA	18	ALPHA - D614G BR2	30	0.175765	0.00120775	0.0697577	0.121941	0.15064	0.243882	0.00836889	0.013549	Not corrected	0.444168	0	Non significant
SARS-CoV-2	245	265	HRSYLTPGDSSSGWTAGAAAY	19	ALPHA - D614G BR2	30	0.191159	0.0012851	-0.0289883	0.0334088	-0.109115	0.100226	-0.00574291	0.00527507	Not corrected	0.191935	0	Non significant
SARS-CoV-2	265	276	YYVGYLQPRTFL	10	ALPHA - D614G BR2	30	0.264264	0.00302501	-0.057797	0.017122	-0.0970758	0.034244	-0.00970758	0.0034244	Not corrected	0.0191824	0	Non significant
SARS-CoV-2	266	276	YVGYLQPRTFL	9	ALPHA - D614G BR2	30	0.258672	0.00260045	-0.0458023	0.00810248	-0.156259	0.016205	-0.0173621	0.00180055	Not corrected	0.00397685	0	Non significant
SARS-CoV-2	267	276	VGYLQPRTFL	8	ALPHA - D614G BR2	30	0.247038	0.00304305	-0.00639233	0.0326109	-0.118704	0.0652218	-0.014838	0.00815272	Not corrected	0.0585303	0	Non significant
SARS-CoV-2	269	276	YLQPRTFL	6	ALPHA - D614G BR2	30	0.235149	0.00338259	-0.012965	0.0339213	-0.0428243	0.0678426	-0.00713738	0.0113071	Not corrected	0.438355	0	Non significant
SARS-CoV-2	291	303	CALDPLSETKCTL	11	ALPHA - D614G BR2	30	0.238376	0.00301627	-0.149347	0.0599883	-0.295869	0.119977	-0.0268972	0.010907	Not corrected	0.0652176	0	Non significant
SARS-CoV-2	306	313	FTVEKGIY	7	ALPHA - D614G BR2	30	0.182435	0.00259673	-0.00974033	0.0252806	-0.0583238	0.0505612	-0.00833198	0.00722303	Not corrected	0.17613	0	Non significant
SARS-CoV-2	306	317	FTVEKGIYQTSN	11	ALPHA - D614G BR2	30	0.164701	0.00227267	-0.051977	0.019561	-0.103554	0.039122	-0.00941404	0.00355655	Not corrected	0.0362296	0	Non significant
SARS-CoV-2	310	318	KGIYQTSNF	8	ALPHA - D614G BR2	30	0.163758	0.00217963	-0.0711557	0.0553847	-0.164217	0.110769	-0.0205271	0.0138462	Not corrected	0.34341	0	Non significant
SARS-CoV-2	314	318	QTSNF	4	ALPHA - D614G BR2	30	0.1175	0.00364452	-0.030923	0.0712382	-0.0387557	0.0712382	-0.00968893	0.0178096	Not corrected	0.482239	0	Non significant
SARS-CoV-2	318	325	FRVQPTES	6	ALPHA - D614G BR2	30	0.147142	0.00192078	-0.235276	0.0754947	-0.225092	0.0754947	-0.0375153	0.0125824	Not corrected	0.0242505	0	Non significant
SARS-CoV-2	369	374	YNSASF	5	ALPHA - D614G BR2	30	0.130028	0.00112425	0.178558	0.0430571	0.193998	0.0430571	0.0387996	0.00861142	Not corrected	0.016425	0	Non significant
SARS-CoV-2	388	392	NDLCF	4	ALPHA - D614G BR2	30	0.197192	0.00250662	0.155765	0.0592524	0.184656	0.0592524	0.0461639	0.0148131	Not corrected	0.0296493	0	Non significant
SARS-CoV-2	396	400	YADSF	4	ALPHA - D614G BR2	30	0.137887	0.00149018	0.130612	0.0224351	0.0858137	0.0224351	0.0214534	0.00560878	Not corrected	0.00732805	0	Non significant
SARS-CoV-2	400	406	FVIRGDE	6	ALPHA - D614G BR2	30	0.154048	0.00161395	-0.033331	0.0181519	-0.0889835	0.0363037	-0.0148306	0.00605062	Not corrected	0.0530029	0	Non significant
SARS-CoV-2	401	420	VIRGDEVRQIAPGQTGKIAD	18	ALPHA - D614G BR2	30	0.158821	0.00265917	-0.0637963	0.0531521	-0.300117	0.159456	-0.0166732	0.00885868	Not corrected	0.0693259	0	Non significant
SARS-CoV-2	401	421	VIRGDEVRQIAPGQTGKIADY	19	ALPHA - D614G BR2	30	0.172443	0.0026491	-0.0556637	0.0293636	-0.124483	0.0880907	-0.00655174	0.00463635	Not corrected	0.135833	0	Non significant
SARS-CoV-2	407	420	VRQIAPGQTGKIAD	12	ALPHA - D614G BR2	30	0.153017	0.00542759	0.13933	0.062453	0.241472	0.124906	0.0201227	0.0104088	Not corrected	0.096458	0	Non significant
SARS-CoV-2	407	421	VRQIAPGQTGKIADY	13	ALPHA - D614G BR2	30	0.158335	0.000843522	0.0128433	0.0911198	0.0539145	0.273359	0.00414727	0.0210276	Not corrected	0.793941	0	Non significant
SARS-CoV-2	407	422	VRQIAPGQTGKIADYN	14	ALPHA - D614G BR2	30	0.152571	0.00141377	0.0998623	0.021029	0.207183	0.042058	0.0147988	0.00300414	Not corrected	0.00186855	0	Non significant
SARS-CoV-2	421	429	YNYKLPDDF	7	ALPHA - D614G BR2	30	0.208337	0.00207719	0.0716637	0.0392568	0.0891441	0.0785137	0.0127349	0.0112162	Not corrected	0.172919	0	Non significant
SARS-CoV-2	422	429	NYKLPDDF	6	ALPHA - D614G BR2	30	0.19954	0.00622997	0.0656667	0.0107234	0.0785439	0.0214469	0.0130906	0.00357448	Not corrected	0.00538776	0	Non significant
SARS-CoV-2	423	429	YKLPDDF	5	ALPHA - D614G BR2	30	0.200924	0.00435715	0.0286067	0.0306627	-0.0107073	0.0613255	-0.00214147	0.0122651	Not corrected	0.809977	0	Non significant
SARS-CoV-2	442	452	DSKVGGNYNYL	10	ALPHA - D614G BR2	30	0.171718	0.00162046	0.0971887	0.0242324	0.158142	0.0484648	0.0158142	0.00484648	Not corrected	0.0384884	0	Non significant
SARS-CoV-2	453	467	YRLFRKSNLKPFERD	13	ALPHA - D614G BR2	30	0.166211	0.00220183	-0.0230427	0.0299323	-0.107224	0.119729	-0.00824802	0.00920992	Not corrected	0.308318	0	Non significant
SARS-CoV-2	456	470	FRKSNLKPFERDIST	13	ALPHA - D614G BR2	30	0.165404	0.00224604	-0.0493723	0.0237286	-0.195096	0.0949144	-0.0150074	0.00730111	Not corrected	0.0760254	0	Non significant
SARS-CoV-2	456	471	FRKSNLKPFERDISTE	14	ALPHA - D614G BR2	30	0.162908	0.00181111	-0.0500017	0.0540306	-0.326878	0.162092	-0.0233484	0.011578	Not corrected	0.0905006	0	Non significant
SARS-CoV-2	497	505	FQPTNGVGY	7	ALPHA - D614G BR2	30	0.237976	0.00212886	-0.00944	0.112607	-0.00754286	0.112607	-0.00107755	0.0160866	Not corrected	0.925305	0	Non significant
SARS-CoV-2	511	515	VVLSF	4	ALPHA - D614G BR2	30	0.227267	0.0020444	-0.0440617	0.0229713	-0.0525936	0.0229713	-0.0131484	0.00574282	Not corrected	0.0748483	0	Non significant
SARS-CoV-2	542	552	NFNGLTGTGVL	10	ALPHA - D614G BR2	30	0.221246	0.00264618	0.08424	0.02185	0.083145	0.02185	0.0083145	0.002185	Not corrected	0.00598979	0	Non significant
SARS-CoV-2	544	552	NGLTGTGVL	8	ALPHA - D614G BR2	30	0.197527	0.00197548	0.109464	0.0429745	0.100296	0.0429745	0.012537	0.00537182	Not corrected	0.0437812	0	Non significant
SARS-CoV-2	553	565	TESNKKFLPFQQF	11	ALPHA - D614G BR2	30	0.248235	0.00204032	-0.11221	0.0460673	-0.183396	0.0921346	-0.0166724	0.00837587	Not corrected	0.0854692	0	Non significant
SARS-CoV-2	575	582	AVRDPQTL	6	ALPHA - D614G BR2	30	0.143129	0.0043807	-0.0150373	0.0089239	-0.112456	0.0178478	-0.0187426	0.00297463	Not corrected	0.000736453	0	Non significant
SARS-CoV-2	575	583	AVRDPQTLE	7	ALPHA - D614G BR2	30	0.140379	0.00331979	0.002629	0.0226237	-0.0489933	0.0452474	-0.00699905	0.00646392	Not corrected	0.181884	0	Non significant
SARS-CoV-2	576	582	VRDPQTL	5	ALPHA - D614G BR2	30	0.151388	0.00380834	-0.0663953	0.0400921	-0.0945772	0.0400921	-0.0189154	0.00801843	Not corrected	0.0581757	0	Non significant
SARS-CoV-2	586	592	DITPCSF	5	ALPHA - D614G BR2	30	0.189515	0.00242068	0.52261	0.125803	0.514526	0.125803	0.102905	0.0251606	Not corrected	0.0109315	0	Non significant
SARS-CoV-2	605	621	SNQVAVLYQGVNCTEVP	15	ALPHA - D614G BR2	30	0.214904	0.00218342	0.0592847	0.0291072	0.15174	0.0873215	0.010116	0.00582144	Not corrected	0.0599997	0	Non significant
SARS-CoV-2	634	643	RVYSTGSNVF	9	ALPHA - D614G BR2	30	0.173624	0.00221174	0.147457	0.0998393	0.116184	0.0998393	0.0129093	0.0110933	Not corrected	0.168948	0	Non significant
SARS-CoV-2	664	682	IPIGAGICASYQTQTNSPA	16	ALPHA - D614G BR2	30	0.216848	0.0024717	-0.031206	0.0265667	-0.232735	0.0797001	-0.0145459	0.00498126	Not corrected	0.0152819	0	Non significant
SARS-CoV-2	685	691	ASQSIIA	6	ALPHA - D614G BR2	30	0.163401	0.0024177	0.0302107	0.131589	0.0454522	0.131589	0.00757537	0.0219314	Not corrected	0.720951	0	Non significant
SARS-CoV-2	688	692	SIIAY	4	ALPHA - D614G BR2	30	0.180807	0.00195876	0.094748	0.211319	0.109618	0.211319	0.0274045	0.0528297	Not corrected	0.505905	0	Non significant
SARS-CoV-2	692	696	YTMSL	4	ALPHA - D614G BR2	30	0.186418	0.00256594	-0.078939	0.03487	-0.102251	0.03487	-0.0255628	0.0087175	Not corrected	0.0401091	0	Non significant
SARS-CoV-2	716	720	TISVT	4	ALPHA - D614G BR2	30	0.153828	0.00357167	-0.008759	0.0206512	-0.0080663	0.0206512	-0.00201658	0.0051628	Not corrected	0.613112	0	Non significant
SARS-CoV-2	721	727	TEILPVS	5	ALPHA - D614G BR2	30	0.203165	0.00195679	0.026304	0.0796619	0.0323973	0.0796619	0.00647946	0.0159324	Not corrected	0.602943	0	Non significant
SARS-CoV-2	721	728	TEILPVSM	6	ALPHA - D614G BR2	30	0.234497	0.00270043	0.012699	0.0240034	0.0091789	0.0240034	0.00152982	0.00400057	Not corrected	0.612171	0	Non significant
SARS-CoV-2	750	756	LLQYGSF	6	ALPHA - D614G BR2	30	0.201467	0.0028348	-0.126118	0.0383844	-0.109782	0.0383844	-0.018297	0.0063974	Not corrected	0.0324391	0	Non significant
SARS-CoV-2	751	756	LQYGSF	5	ALPHA - D614G BR2	30	0.173806	0.0023895	-0.0755057	0.0178702	-0.0567606	0.0178702	-0.0113521	0.00357404	Not corrected	0.0232032	0	Non significant
SARS-CoV-2	761	768	NRALTGIA	7	ALPHA - D614G BR2	30	0.169172	0.00246997	-0.203679	0.0139603	-0.191871	0.0139603	-0.0274102	0.00199432	Not corrected	0.000951005	0	Non significant
SARS-CoV-2	767	779	IAVEQDKNTQEVF	12	ALPHA - D614G BR2	30	0.184473	0.001483	-0.0760077	0.018884	-0.198998	0.037768	-0.0165831	0.00314733	Not corrected	0.00146181	0	Non significant
SARS-CoV-2	769	779	VEQDKNTQEVF	10	ALPHA - D614G BR2	30	0.163164	0.00156074	-0.0102913	0.028521	-0.0559006	0.0570421	-0.00559006	0.00570421	Not corrected	0.215614	0	Non significant
SARS-CoV-2	780	793	AQVKQIYKTPPIKD	11	ALPHA - D614G BR2	30	0.163548	0.00187913	-0.144311	0.0917191	-0.298118	0.183438	-0.0271017	0.0166762	Not corrected	0.0715349	0	Non significant
SARS-CoV-2	815	819	IEDLL	4	ALPHA - D614G BR2	30	0.21592	0.00263392	0.0574783	0.027102	0.0539012	0.027102	0.0134753	0.00677551	Not corrected	0.041531	0	Non significant
SARS-CoV-2	818	825	LLFNKVTL	7	ALPHA - D614G BR2	30	0.256098	0.00324694	-0.074083	0.0105992	-0.182006	0.0211985	-0.0260008	0.00302836	Not corrected	0.000900707	0	Non significant
SARS-CoV-2	819	825	LFNKVTL	6	ALPHA - D614G BR2	30	0.221703	0.00201553	-0.103	0.0412582	-0.263565	0.0825163	-0.0439274	0.0137527	Not corrected	0.0101395	0	Non significant
SARS-CoV-2	820	825	FNKVTL	5	ALPHA - D614G BR2	30	0.19834	0.00182769	-0.02725	0.0274769	-0.0280922	0.0274769	-0.00561845	0.00549538	Not corrected	0.256862	0	Non significant
SARS-CoV-2	820	829	FNKVTLADAG	9	ALPHA - D614G BR2	30	0.165548	0.000966139	-0.0674125	0.00907368	-0.207604	0.0181474	-0.0230671	0.00201637	Not corrected	0.00979602	0	Non significant
SARS-CoV-2	821	830	NKVTLADAGF	9	ALPHA - D614G BR2	30	0.19909	0.00259908	-0.111865	0.0192683	-0.219506	0.0385366	-0.0243896	0.00428184	Not corrected	0.0101567	0	Non significant
SARS-CoV-2	826	830	ADAGF	4	ALPHA - D614G BR2	30	0.125337	0.00109312	-0.060338	0.0314331	-0.0635171	0.0314331	-0.0158793	0.00785828	Not corrected	0.0454908	0	Non significant
SARS-CoV-2	856	862	TVLPPLL	4	ALPHA - D614G BR2	30	0.273208	0.00348335	-0.262392	0.100389	-0.296611	0.100389	-0.0741527	0.0250973	Not corrected	0.0350389	0	Non significant
SARS-CoV-2	867	874	IAQYTSAL	7	ALPHA - D614G BR2	30	0.172225	0.00182376	0.136682	0.0743536	0.13375	0.0743536	0.0191071	0.0106219	Not corrected	0.0636516	0	Non significant
SARS-CoV-2	899	903	MAYRF	4	ALPHA - D614G BR2	30	0.182979	0.00175306	0.017801	0.0329825	-0.00283063	0.0329825	-0.000707657	0.00824563	Not corrected	0.903815	0	Non significant
SARS-CoV-2	899	913	MAYRFNGIGVTQNVL	14	ALPHA - D614G BR2	30	0.242615	0.00350535	0.048488	0.0976153	0.0531987	0.195231	0.00379991	0.013945	Not corrected	0.720225	0	Non significant
SARS-CoV-2	900	910	AYRFNGIGVTQ	10	ALPHA - D614G BR2	30	0.183991	0.00340456	0.216754	0.0516241	0.368765	0.103248	0.0368765	0.0103248	Not corrected	0.0221296	0	Non significant
SARS-CoV-2	900	913	AYRFNGIGVTQNVL	13	ALPHA - D614G BR2	30	0.230564	0.00300554	0.00417767	0.0560129	0.0199558	0.112026	0.00153506	0.00861737	Not corrected	0.810563	0	Non significant
SARS-CoV-2	901	913	YRFNGIGVTQNVL	12	ALPHA - D614G BR2	30	0.231545	0.0028091	0.0818963	0.0630788	0.123845	0.126158	0.0103205	0.0105131	Not corrected	0.264194	0	Non significant
SARS-CoV-2	904	913	NGIGVTQNVL	9	ALPHA - D614G BR2	30	0.199632	0.00210435	-0.011235	0.144933	-0.0194702	0.144933	-0.00216336	0.0161037	Not corrected	0.858871	0	Non significant
SARS-CoV-2	906	913	IGVTQNVL	7	ALPHA - D614G BR2	30	0.197629	0.0016895	-0.0290997	0.168296	-0.105568	0.168296	-0.0150812	0.0240422	Not corrected	0.426964	0	Non significant
SARS-CoV-2	914	919	YENQKL	5	ALPHA - D614G BR2	30	0.157133	0.00963182	-0.012021	0.0116173	-0.0338924	0.0232346	-0.00677847	0.00464691	Not corrected	0.112486	0	Non significant
SARS-CoV-2	920	924	IANQF	4	ALPHA - D614G BR2	30	0.142016	0.00120245	-0.0164567	0.0265105	-0.0414258	0.0265105	-0.0103565	0.00662763	Not corrected	0.0901841	0	Non significant
SARS-CoV-2	920	935	IANQFNSAIGKIQDSL	15	ALPHA - D614G BR2	30	0.234789	0.00282298	-0.0823707	0.0208009	-0.169949	0.0416018	-0.0113299	0.00277345	Not corrected	0.00363605	0	Non significant
SARS-CoV-2	925	935	NSAIGKIQDSL	10	ALPHA - D614G BR2	30	0.191928	0.00168912	-0.0596223	0.056373	-0.149175	0.112746	-0.0149175	0.0112746	Not corrected	0.118404	0	Non significant
SARS-CoV-2	928	935	IGKIQDSL	7	ALPHA - D614G BR2	30	0.180935	0.00334421	-0.143472	0.0536671	-0.334469	0.107334	-0.0477813	0.0153334	Not corrected	0.0187773	0	Non significant
SARS-CoV-2	928	942	IGKIQDSLSSTASAL	14	ALPHA - D614G BR2	30	0.200141	0.00239005	0.051895	0.0443154	0.126807	0.0886308	0.00905767	0.00633077	Not corrected	0.0988267	0	Non significant
SARS-CoV-2	936	942	SSTASAL	6	ALPHA - D614G BR2	30	0.142482	0.0055166	0.346818	0.0921579	0.329517	0.0921579	0.0549195	0.0153597	Not corrected	0.0260742	0	Non significant
SARS-CoV-2	944	952	KLQDVVNQN	8	ALPHA - D614G BR2	30	0.182513	0.00207388	-0.22448	0.0304419	-0.19734	0.0304419	-0.0246676	0.00380524	Not corrected	0.000674164	0	Non significant
SARS-CoV-2	954	958	QALNT	4	ALPHA - D614G BR2	30	0.137069	0.0122204	-0.0270847	0.0230298	-0.00448563	0.0230298	-0.00112141	0.00575746	Not corrected	0.785658	0	Non significant
SARS-CoV-2	959	967	LVKQLSSNF	8	ALPHA - D614G BR2	30	0.18655	0.00182244	-0.103789	0.02163	-0.231576	0.0432599	-0.028947	0.00540749	Not corrected	0.00513101	0	Non significant
SARS-CoV-2	959	974	LVKQLSSNFGAISSVL	15	ALPHA - D614G BR2	30	0.267019	0.00275918	-0.279244	0.0540132	-0.477139	0.108026	-0.0318092	0.00720176	Not corrected	0.0215497	0	Non significant
SARS-CoV-2	960	967	VKQLSSNF	7	ALPHA - D614G BR2	30	0.161903	0.00138962	-0.0842653	0.0569395	-0.225727	0.113879	-0.0322468	0.0162684	Not corrected	0.0449016	0	Non significant
SARS-CoV-2	968	974	GAISSVL	6	ALPHA - D614G BR2	30	0.202894	0.00220333	-0.238192	0.0212249	-0.237379	0.0212249	-0.0395631	0.00353748	Not corrected	0.00125887	0	Non significant
SARS-CoV-2	988	993	VQIDRL	5	ALPHA - D614G BR2	30	0.181517	0.00177452	-0.111249	0.0197216	-0.133623	0.0197216	-0.0267245	0.00394432	Not corrected	0.00171758	0	Non significant
SARS-CoV-2	988	998	VQIDRLITGRL	10	ALPHA - D614G BR2	30	0.237596	0.00276211	-0.111748	0.126187	-0.223524	0.252375	-0.0223524	0.0252375	Not corrected	0.288138	0	Non significant
SARS-CoV-2	994	998	ITGRL	4	ALPHA - D614G BR2	30	0.160205	0.00475369	0.10135	0.0201178	0.0648816	0.0201178	0.0162204	0.00502944	Not corrected	0.0148424	0	Non significant
SARS-CoV-2	999	1003	QSLQT	4	ALPHA - D614G BR2	30	0.183278	0.0186744	0.0983127	0.0189767	0.0917619	0.0189767	0.0229405	0.00474419	Not corrected	0.00197165	0	Non significant
SARS-CoV-2	1004	1009	YVTQQL	5	ALPHA - D614G BR2	30	0.150489	0.00107702	0.194811	0.0177574	0.192212	0.0177574	0.0384424	0.00355147	Not corrected	0.000173917	0	Non significant
SARS-CoV-2	1013	1017	AEIRA	4	ALPHA - D614G BR2	30	0.138187	0.0212374	0.177537	0.0345351	0.158567	0.0345351	0.0396417	0.00863377	Not corrected	0.0146491	0	Non significant
SARS-CoV-2	1013	1021	AEIRASANL	8	ALPHA - D614G BR2	30	0.157211	0.0015059	0.310897	0.0645847	0.310896	0.0645847	0.038862	0.00807308	Not corrected	0.0119554	0	Non significant
SARS-CoV-2	1015	1021	IRASANL	6	ALPHA - D614G BR2	30	0.156715	0.00262149	0.235129	0.0473135	0.249143	0.0473135	0.0415238	0.00788559	Not corrected	0.00188598	0	Non significant
SARS-CoV-2	1047	1059	MSFPQSAPHGVVF	10	ALPHA - D614G BR2	30	0.23458	0.00331227	0.0212477	0.0733719	0.070446	0.146744	0.0070446	0.0146744	Not corrected	0.545852	0	Non significant
SARS-CoV-2	1087	1092	PREGVF	4	ALPHA - D614G BR2	30	0.169051	0.00251451	0.036431	0.0139566	0.00373881	0.0139566	0.000934702	0.00348914	Not corrected	0.71156	0	Non significant
SARS-CoV-2	1088	1100	REGVFVSNGTHWF	12	ALPHA - D614G BR2	30	0.216008	0.00203148	0.0967267	0.0396756	0.21396	0.0793513	0.01783	0.00661261	Not corrected	0.0182081	0	Non significant
SARS-CoV-2	1106	1114	FYEPQIITT	7	ALPHA - D614G BR2	30	0.202937	0.00366248	0.147955	0.186934	0.187166	0.186934	0.0267379	0.0267048	Not corrected	0.451912	0	Non significant
SARS-CoV-2	1198	1206	QELGKYEQY	8	ALPHA - D614G BR2	30	0.136538	0.00115839	-0.125751	0.032196	-0.124423	0.032196	-0.0155529	0.0040245	Not corrected	0.0146376	0	Non significant
SARS-CoV-2	1235	1242	YVRKDGEW	7	ALPHA - D614G BR2	30	0.136279	0.00192396	-0.128223	0.0741511	-0.131	0.0741511	-0.0187144	0.010593	Not corrected	0.292617	0	Non significant
SARS-CoV-2	1243	1247	VLLST	4	ALPHA - D614G BR2	30	0.176189	0.00176905	-0.046347	0.0282726	-0.0275937	0.0282726	-0.00689843	0.00706814	Not corrected	0.236593	0	Non significant
SARS-CoV-2	1243	1248	VLLSTF	5	ALPHA - D614G BR2	30	0.23308	0.00178804	-0.147241	0.0883031	-0.135458	0.0883031	-0.0270916	0.0176606	Not corrected	0.115998	0	Non significant
SARS-CoV-2	192	201	FVFKNIDGYF	9	ALPHA - D614G BR2	30	0.245913	0.00272283	-0.111496	0.00542188	-0.263492	0.0108438	-0.0292769	0.00120486	Not corrected	2.48916e-05	0	Protected
SARS-CoV-2	306	318	FTVEKGIYQTSNF	12	ALPHA - D614G BR2	30	0.196856	0.00269111	-0.13785	0.0238627	-0.368272	0.0477255	-0.0306893	0.00397712	Not corrected	0.000318784	0	Protected
SARS-CoV-2	444	452	KVGGNYNYL	8	ALPHA - D614G BR2	30	0.178289	0.00484497	-0.121601	0.0272947	-0.283788	0.0545895	-0.0354735	0.00682368	Not corrected	0.00608281	0	Protected
SARS-CoV-2	456	467	FRKSNLKPFERD	10	ALPHA - D614G BR2	30	0.149583	0.0027473	-0.125089	0.0211225	-0.287548	0.0422449	-0.0287548	0.00422449	Not corrected	0.00791999	0	Protected
SARS-CoV-2	553	568	TESNKKFLPFQQFGRD	14	ALPHA - D614G BR2	30	0.216492	0.00239582	-0.172906	0.0215949	-0.641858	0.0647848	-0.045847	0.00462749	Not corrected	0.00193972	0	Protected
SARS-CoV-2	820	830	FNKVTLADAGF	10	ALPHA - D614G BR2	30	0.222925	0.00331815	-0.0997807	0.0204611	-0.273405	0.0409222	-0.0273405	0.00409222	Not corrected	0.0070759	0	Protected
SARS-CoV-2	943	958	GKLQDVVNQNAQALNT	15	ALPHA - D614G BR2	30	0.162418	0.0020528	-0.168726	0.0266073	-0.338214	0.0532146	-0.0225476	0.00354764	Not corrected	0.00179625	0	Protected
SARS-CoV-2	1221	1225	GSGYI	4	ALPHA - D614G BR2	30	0.175644	0.00230443	-0.438872	0.0221633	-0.405045	0.0221633	-0.101261	0.00554082	Not corrected	0.000410783	0	Protected
SARS-CoV-2	92	103	FASTEKSNIIRG	11	ALPHA - D614G BR2	30	0.15479	0.00159046	0.279232	0.0159953	0.51542	0.0319906	0.0468564	0.00290824	Not corrected	0.00108768	0	Deprotected
SARS-CoV-2	93	103	ASTEKSNIIRG	10	ALPHA - D614G BR2	30	0.154112	0.00134776	0.287722	0.028612	0.575032	0.057224	0.0575032	0.0057224	Not corrected	0.00212615	0	Deprotected
SARS-CoV-2	94	103	STEKSNIIRG	9	ALPHA - D614G BR2	30	0.152394	0.00279367	0.272016	0.0211926	0.518568	0.0423852	0.0576186	0.00470946	Not corrected	7.16035e-05	0	Deprotected
SARS-CoV-2	177	191	MDLEGKQGNFKNLRE	14	ALPHA - D614G BR2	30	0.154217	0.00281301	0.21889	0.0172759	0.606648	0.0518277	0.043332	0.00370198	Not corrected	0.000229859	0	Deprotected
SARS-CoV-2	180	191	EGKQGNFKNLRE	11	ALPHA - D614G BR2	30	0.149602	0.010549	0.346298	0.0454845	0.645179	0.090969	0.0586527	0.00826991	Not corrected	0.00145558	0	Deprotected
SARS-CoV-2	627	633	DQLTPTW	5	ALPHA - D614G BR2	30	0.185348	0.0023407	0.34054	0.0536269	0.340646	0.0536269	0.0681292	0.0107254	Not corrected	0.00531292	0	Deprotected
SARS-CoV-2	925	947	NSAIGKIQDSLSSTASALGKLQD	22	ALPHA - D614G BR2	30	0.229937	0.00388267	0.145741	0.0454666	0.339103	0.0909331	0.0154138	0.00413332	Not corrected	0.00636699	0	Deprotected
SARS-CoV-2	990	998	IDRLITGRL	8	ALPHA - D614G BR2	30	0.199025	0.00207439	0.203575	0.0386647	0.355913	0.0773294	0.0444891	0.00966617	Not corrected	0.00231786	0	Deprotected
