# Supplementary material for: Timeline of changes in spike conformational dynamics in emergent SARS-CoV-2 variants reveal progressive stabilization of trimer stalk with altered NTD dynamics
Source: eLife. 2023 Mar 17;12:e82584. doi: 10.7554/eLife.82584 (PMC10049203; doi:10.7554/eLife.82584)
Supplement: Figure 5—source data 1. [file elife-82584-fig5-data1.xlsx]

## Sheet: Delta_minus_Alpha
				Delta minus Alpha (Da)
Plot Number	Sequence	Start	End	1 min	2 min	10 min	30 min
1	FTRGVYYPDKV	32	42	-0.135	-0.1663	-0.0889	-0.1495
2	FTRGVYYPDKVF	32	43	0.0973	0.1034	0.1104	0.0871
3	FTRGVYYPDKVFRSSVL	32	48	0.0653	-0.0104	0.0411	-0.025
4	HSTQDL	49	54	0.002	-0.0926	-0.1195	-0.1963
5	HSTQDLF	49	55	-0.0712	-0.1677	-0.147	-0.1122
6	HSTQDLFL	49	56	-0.0128	-0.0648	-0.0721	-0.0788
7	FASTEKSNIIRG	92	103	-0.3836	-0.6207	-0.681	-0.5838
8	STEKSNIIRG	94	103	-0.3671	-0.5805	-0.7045	-0.5722
9	FASTEKSNIIRGWIF	92	106	-0.2238	-0.3278	-0.3766	-0.1924
10	WIFGTTL	104	110	-0.0298	-0.0141	-0.0698	0.101
11	DSKTQSL	111	117	-0.0061	-0.051	0.0059	-0.01
12	DSKTQSLL	111	118	0.0179	0.0449	0.1754	0.0438
13	MDLEGKQGNF	177	186	-0.4578	-0.9054	-0.9408	-0.9249
14	MDLEGKQGNFKNLRE	177	191	-0.6845	-1.3762	-1.5303	-1.3861
15	EGKQGNFKNLRE	180	191	-0.691	-1.1698	-1.4114	-1.2194
16	FVFKNIDG	192	199	-0.0805	-0.2098	-0.3697	-0.0504
17	FVFKNIDGY	192	200	-0.0537	-0.2522	-0.2654	-0.146
18	FVFKNIDGYF	192	201	0.0451	-0.1646	-0.1507	-0.0071
19	YFKIYSKHTPINL	200	212	-0.401	-0.6261	-0.3058	-0.2705
20	FKIYSKHTPINL	201	212	-0.5514	-0.6494	-0.4096	-0.2888
21	KIYSKHTPINL	202	212	-0.5111	-0.7038	-0.4331	-0.3884
22	VRDLPQGF	213	220	-0.2077	-0.4014	-0.2743	-0.3379
23	ALHRSYLTPGDSSSGWTAGAAA	243	264	-0.7057	-1.6004	-1.2923	-1.0921
24	HRSYLTPGDSSSGWTAGAAA	245	264	-0.6741	-1.5414	-1.358	-1.161
25	HRSYLTPGDSSSGWTAGAAAY	245	265	-0.4929	-1.4116	-1.4016	-1.2269
26	YYVGYLQPRTFL	265	276	-0.0348	-0.0599	-0.085	-0.0587
27	YVGYLQPRTFL	266	276	0.0241	-0.1236	-0.0175	0.0334
28	VGYLQPRTFL	267	276	-0.0957	-0.1458	0.0371	-0.0577
29	YLQPRTFL	269	276	-0.0819	-0.1905	-0.0744	0.0351
30	CALDPLSETKCTL	291	303	0.0881	-0.0847	0.202	0.226
31	FTVEKGIY	306	313	0.01	-0.2581	-0.2224	-0.2124
32	FTVEKGIYQTSN	306	317	-0.153	-0.5761	-0.5158	-0.2954
33	FTVEKGIYQTSNF	306	318	0.1767	-0.286	-0.2105	-0.1945
34	QTSNF	314	318	0.0773	-0.0218	0.0261	-0.1144
35	FRVQPTES	318	325	-0.0171	-0.2792	-0.2311	-0.1312
36	YNSASF	369	374	-0.1299	-0.3694	-0.3008	-0.2729
37	NDLCF	388	392	-0.201	-0.1866	-0.1733	-0.1864
38	YADSF	396	400	-0.0128	-0.0304	-0.0354	-0.0722
39	FVIRGDE	400	406	0.0849	0.0892	0.0448	0.0449
40	VIRGDEVRQIAPGQTGKIAD	401	420	0.1569	-0.3565	-0.2126	-0.3219
41	VIRGDEVRQIAPGQTGKIADY	401	421	0.0788	-0.2569	-0.3211	-0.2019
42	VRQIAPGQTGKIAD	407	420	0.0014	-0.195	-0.1845	-0.375
43	VRQIAPGQTGKIADY	407	421	-0.0407	-0.236	-0.2033	-0.3081
44	VRQIAPGQTGKIADYN	407	422	0.0472	-0.1636	-0.1678	-0.1918
45	YKLPDDF	423	429	0.0693	0.024	-0.0524	0.0458
46	FRKSNLKPFERD	456	467	0.0568	-0.0758	0.0223	0.0551
47	FRKSNLKPFERDIST	456	470	0.0145	-0.2028	-0.1827	-0.2565
48	FRKSNLKPFERDISTE	456	471	-0.0428	-0.1354	-0.0688	-0.0635
49	VVLSF	511	515	0.0097	0.0179	-0.0007	-0.0083
50	ELLHAPATVCGPKKSTNL	516	533	-0.5742	-0.7169	-0.6454	-0.487
51	NFNGLTGTGVL	542	552	-0.1176	-0.2438	-0.2677	-0.216
52	NGLTGTGVL	544	552	-0.0319	-0.1471	-0.1566	-0.2014
53	TESNKKFLPFQQF	553	565	-0.0492	-0.0611	0.0826	0.1464
54	TESNKKFLPFQQFGRD	553	568	-0.0419	-0.1248	0.1673	0.3767
55	AVRDPQTL	575	582	-0.1694	-0.1898	-0.2903	-0.1952
56	AVRDPQTLE	575	583	-0.1723	-0.1923	-0.3547	-0.3002
57	VRDPQTL	576	582	-0.0825	-0.1749	-0.278	-0.2277
58	DITPCSF	586	592	-0.0094	-0.1626	-0.2197	-0.3373
59	DQLTPTW	627	633	-0.2597	-0.53	-0.4192	-0.2755
60	RVYSTGSNVF	634	643	-0.1464	-0.5005	-0.4682	-0.4623
61	QTQTNSPASVASQSI	675	689	-0.1874	-0.0582		-0.3926
62	ASQSIIA	685	691	-0.0518	-0.1738	-0.2823	-0.1196
63	SIIAY	688	692	-0.0522	-0.0493	-0.0731	-0.0925
64	YTMSL	692	696	-0.0072	-0.0612	-0.0516	-0.0529
65	TISVT	716	720	-0.0392	-0.0584	-0.0015	-0.0202
66	VTTEIL	719	724	0.0551	-0.1712	-0.1699	-0.0815
67	TEILPVS	721	727	-0.056	-0.0476	-0.0397	-0.0786
68	TEILPVSM	721	728	0.0112	-0.0793	-0.0329	-0.0599
69	LLQYGSF	750	756	0.1054	-0.1091	-0.127	-0.1538
70	LQYGSF	751	756	0.0894	-0.1132	-0.1416	-0.1419
71	NRALTGIA	761	768	0.1262	0.131	0.1543	0.0617
72	IAVEQDKNTQEVF	767	779	0.0194	0.0355	0.0534	0.1755
73	VEQDKNTQEVF	769	779	-0.0893	-0.1068	-0.0643	-0.0513
74	AQVKQIYKTPPIKD	780	793	0.0264	-0.3626	-0.4965	-0.4314
75	IEDLL	815	819	-0.0098	-0.038	-0.0231	-0.0501
76	LLFNKVTL	818	825	0.0393	-0.2884	-0.2807	-0.1523
77	LFNKVTL	819	825	0.1983	-0.2211	-0.1133	-0.0515
78	FNKVTL	820	825	-0.0356	-0.3291	-0.2941	-0.2344
79	FNKVTLADAG	820	829	-0.0827	-0.7105	-0.344	-0.4867
80	FNKVTLADAGF	820	830	0.1561	-0.4911	-0.3428	-0.1841
81	NKVTLADAGF	821	830	0.1258	-0.5151	-0.4713	-0.3339
82	ADAGF	826	830	-0.0215	-0.2046	-0.1314	-0.0991
83	TVLPPLL	856	862	0.2291	0.24	0.4145	0.2698
84	IAQYTSAL	867	874	-0.0383	-0.0262	-0.0741	-0.1058
85	LAGTITSG	875	882	0.119	0.2936	-0.0214	-0.1719
86	MAYRF	899	903	-0.0005	0.0037	-0.0586	0.0338
87	AYRFNGIGVTQ	900	910	-0.297	-0.47	-0.2377	-0.5984
88	MAYRFNGIGVTQNVL	899	913	-0.2442	-0.2927	-0.4498	-0.2426
89	AYRFNGIGVTQNVL	900	913	-0.272	-0.4232	-0.4049	-0.2582
90	YRFNGIGVTQNVL	901	913	-0.2645	-0.3781	-0.264	-0.0999
91	NGIGVTQNVL	904	913	-0.1327	-0.2635	-0.2533	-0.1657
92	IGVTQNVL	906	913	-0.0275	-0.0485	-0.0832	-0.0201
93	YENQKL	914	919	-0.126	-0.2084	-0.148	-0.1179
94	IANQF	920	924	0.0019	-0.0279	-0.0648	-0.0706
95	IANQFNSAIGKIQDSL	920	935	0.1091	-0.2867	-0.2688	-0.1516
96	NSAIGKIQDSL	925	935	0.1817	-0.2182	-0.2541	-0.1592
97	IGKIQDSL	928	935	0.2807	-0.0354	-0.181	0.0319
98	IGKIQDSLSSTASAL	928	942	-0.3457	-1.1713	-1.0638	-0.7694
99	SSTASAL	936	942	-0.203	-0.621	-0.6832	-0.6695
100	KLQDVVNQN	944	952	0.1122	-0.0196	-0.0728	-0.1049
101	GKLQDVVNQNAQALNT	943	958	1.2268	0.5121	-0.2635	-0.5166
102	QALNT	954	958	0.0589	0.0737	0.0571	-0.0395
103	LVKQLSSNF	959	967	0.1724	0.0534	-0.0007	-0.074
104	VKQLSSNF	960	967	-0.0764	-0.0932	-0.1003	-0.1451
105	LVKQLSSNFGAISSVL	959	974	0.1531	-0.1442	-0.2512	-0.2661
106	GAISSVL	968	974	0.2412	0.0312	0.0122	-0.0585
107	VQIDRL	988	993	0.0729	0.0717	-0.0515	-0.0925
108	VQIDRLITGRL	988	998	0.0046	0.2042	0.1591	-0.0594
109	IDRLITGRL	990	998	-0.2082	-0.093	-0.228	-0.4218
110	ITGRL	994	998	-0.0014	0.0053	-0.064	-0.0476
111	QSLQT	999	1003	-0.1091	-0.1004	-0.0935	-0.0736
112	YVTQQL	1004	1009	-0.0618	-0.1314	-0.1152	-0.16
113	AEIRASANL	1013	1021	-0.1304	-0.1849	-0.1485	-0.1718
114	IRASANL	1015	1021	-0.1438	-0.1064	-0.1175	-0.1235
115	MSFPQSAPHGVVF	1047	1059	-0.109	-0.0061	-0.0211	-0.1034
116	PREGVF	1087	1092	0.0347	-0.0841	-0.0843	-0.0339
117	FVTQRNF	1100	1106	-0.1655	-0.269	0.0673	0.022
118	FYEPQIITT	1106	1114	0.0254	-0.1581	-0.1162	-0.0725
119	QELGKYEQY	1198	1206	-0.1226	-0.6305	-0.4764	-0.3764
120	GSGYI	1221	1225	0.079	0.1067	0.187	0.2113
121	YVRKDGEW	1235	1242	-0.0594	-0.1654	-0.0728	-0.0449
122	VLLST	1243	1247	-0.0663	-0.152	-0.0829	-0.1562
123	VLLSTF	1243	1248	0.0021	-0.1794	-0.1076	-0.1736
