# Supplementary material for: Timeline of changes in spike conformational dynamics in emergent SARS-CoV-2 variants reveal progressive stabilization of trimer stalk with altered NTD dynamics
Source: eLife. 2023 Mar 17;12:e82584. doi: 10.7554/eLife.82584 (PMC10049203; doi:10.7554/eLife.82584)
Supplement: Figure 5—source data 2. [file elife-82584-fig5-data2.xlsx]

## Sheet: Figure 5- Source Data 2- Delta 
Protein	Start	End	Sequence	MaxUptake	State	Exposure	RT_diff_ave	RT_diff_SD	Center_diff_ave	Center_diff_SD	Uptake_diff_ave	Uptake_diff_SD	RU_diff_ave	RU_diff_SD	Correction	Welch_pValue	BH_sig	Significance
SARS-CoV-2	32	42	FTRGVYYPDKV	9	DELTA - ALPHA	1	-0.159238	0.0138566	-0.077375	0.00844618	-0.135414	0.0168924	-0.015046	0.00187693	Not corrected	0.000280551	0	Non significant
SARS-CoV-2	32	43	FTRGVYYPDKVF	10	DELTA - ALPHA	1	-0.185791	0.0165409	0.0136563	0.0133333	0.0972565	0.0399998	0.00972565	0.00399998	Not corrected	0.0229163	0	Non significant
SARS-CoV-2	32	48	FTRGVYYPDKVFRSSVL	15	DELTA - ALPHA	1	-0.194523	0.0139051	-0.00804067	0.0177797	0.0616214	0.0711187	0.0041081	0.00474125	Not corrected	0.321299	0	Non significant
SARS-CoV-2	49	54	HSTQDL	5	DELTA - ALPHA	1	-0.0998113	0.0220578	-0.0438407	0.0267384	-7.36235e-05	0.0267384	-1.47247e-05	0.00534769	Not corrected	0.996961	0	Non significant
SARS-CoV-2	49	55	HSTQDLF	6	DELTA - ALPHA	1	-0.175746	0.0166826	-0.0330563	0.0545739	-0.0773342	0.0545739	-0.012889	0.00909565	Not corrected	0.150576	0	Non significant
SARS-CoV-2	49	56	HSTQDLFL	7	DELTA - ALPHA	1	-0.198648	0.0129209	-0.0351043	0.0259725	-0.0108977	0.0259725	-0.00155681	0.00371036	Not corrected	0.563377	0	Non significant
SARS-CoV-2	85	91	PFNDGVY	5	DELTA - ALPHA	1	-0.150475	0.0217788	-0.198935	0.0412208	-0.195756	0.0412208	-0.0391512	0.00824417	Not corrected	0.0154407	0	Non significant
SARS-CoV-2	92	106	FASTEKSNIIRGWIF	14	DELTA - ALPHA	1	-0.224205	0.0225158	-0.0507747	0.0388528	-0.238103	0.116558	-0.0170074	0.00832559	Not corrected	0.0571393	0	Non significant
SARS-CoV-2	104	110	WIFGTTL	6	DELTA - ALPHA	1	-0.21571	0.00935037	-0.0387973	0.083968	-0.0421863	0.083968	-0.00703105	0.0139947	Not corrected	0.493051	0	Non significant
SARS-CoV-2	111	117	DSKTQSL	6	DELTA - ALPHA	1	-0.154419	0.0307469	-0.0598987	0.0315479	-0.00674479	0.0315479	-0.00112413	0.00525798	Not corrected	0.778817	0	Non significant
SARS-CoV-2	111	118	DSKTQSLL	7	DELTA - ALPHA	1	-0.147274	0.00758065	-0.0229947	0.0364655	0.0142975	0.072931	0.0020425	0.0104187	Not corrected	0.812952	0	Non significant
SARS-CoV-2	177	186	MDLEGKQGNF	9	DELTA - ALPHA	1	-0.160382	0.0185562	-0.249391	0.0998623	-0.475743	0.199725	-0.0528603	0.0221916	Not corrected	0.0587869	0	Non significant
SARS-CoV-2	192	200	FVFKNIDGY	8	DELTA - ALPHA	1	-0.177842	0.0191967	-0.0463957	0.0217076	-0.0533194	0.0434152	-0.00666492	0.0054269	Not corrected	0.204724	0	Non significant
SARS-CoV-2	192	201	FVFKNIDGYF	9	DELTA - ALPHA	1	-0.20546	0.0140831	0.0145793	0.024495	0.0411009	0.0489901	0.00456677	0.00544334	Not corrected	0.321693	0	Non significant
SARS-CoV-2	195	201	KNIDGYF	6	DELTA - ALPHA	1	-0.166129	0.0211581	-0.0226538	0.0130753	-0.0624982	0.0130753	-0.0104164	0.00217922	Not corrected	0.00677179	0	Non significant
SARS-CoV-2	213	220	VRDLPQGF	6	DELTA - ALPHA	1	-0.168017	0.0162983	-0.111639	0.0336784	-0.208269	0.0673567	-0.0347115	0.0112261	Not corrected	0.0140995	0	Non significant
SARS-CoV-2	245	265	HRSYLTPGDSSSGWTAGAAAY	19	DELTA - ALPHA	1	-0.172971	0.0172441	-0.127507	0.058297	-0.502151	0.174891	-0.026429	0.00920479	Not corrected	0.0159685	0	Non significant
SARS-CoV-2	265	276	YYVGYLQPRTFL	10	DELTA - ALPHA	1	-0.213507	0.0115223	-0.00966967	0.0269998	-0.0425452	0.0539996	-0.00425452	0.00539996	Not corrected	0.328056	0	Non significant
SARS-CoV-2	266	276	YVGYLQPRTFL	9	DELTA - ALPHA	1	-0.206565	0.0117991	0.000332333	0.0122971	0.0225394	0.0245942	0.00250438	0.00273269	Not corrected	0.264129	0	Non significant
SARS-CoV-2	267	276	VGYLQPRTFL	8	DELTA - ALPHA	1	-0.202755	0.011718	-0.107665	0.0259373	-0.0979956	0.0518745	-0.0122494	0.00648432	Not corrected	0.0559781	0	Non significant
SARS-CoV-2	269	276	YLQPRTFL	6	DELTA - ALPHA	1	-0.196246	0.0121404	-0.0698437	0.0422379	-0.0799665	0.0844759	-0.0133277	0.0140793	Not corrected	0.288597	0	Non significant
SARS-CoV-2	291	303	CALDPLSETKCTL	11	DELTA - ALPHA	1	-0.190064	0.00867724	0.029239	0.0295434	0.081145	0.0590868	0.00737682	0.00537153	Not corrected	0.119628	0	Non significant
SARS-CoV-2	306	313	FTVEKGIY	7	DELTA - ALPHA	1	-0.165375	0.0149524	-0.0195497	0.0289683	0.00807558	0.0579367	0.00115365	0.00827667	Not corrected	0.84463	0	Non significant
SARS-CoV-2	306	317	FTVEKGIYQTSN	11	DELTA - ALPHA	1	-0.149051	0.0140543	-0.087011	0.0511513	-0.164374	0.102303	-0.0149431	0.00930024	Not corrected	0.121427	0	Non significant
SARS-CoV-2	306	318	FTVEKGIYQTSNF	12	DELTA - ALPHA	1	-0.173704	0.0167116	0.0469723	0.0369636	0.173178	0.0739271	0.0144315	0.00616059	Not corrected	0.053717	0	Non significant
SARS-CoV-2	314	318	QTSNF	4	DELTA - ALPHA	1	-0.121471	0.023253	0.0693747	0.053616	0.0722492	0.053616	0.0180623	0.013404	Not corrected	0.167043	0	Non significant
SARS-CoV-2	318	325	FRVQPTES	6	DELTA - ALPHA	1	-0.121024	0.0106893	0.0249222	0.031043	-0.0186833	0.031043	-0.00311388	0.00517383	Not corrected	0.547983	0	Non significant
SARS-CoV-2	351	361	YAWNRKRISNC	10	DELTA - ALPHA	1	-0.138926	0.0251409	-0.0590557	0.0529636	-0.135061	0.158891	-0.0135061	0.0158891	Not corrected	0.352508	0	Non significant
SARS-CoV-2	369	374	YNSASF	5	DELTA - ALPHA	1	-0.136142	0.0233144	-0.132371	0.0441888	-0.133402	0.0441888	-0.0266804	0.00883776	Not corrected	0.0197407	0	Non significant
SARS-CoV-2	388	392	NDLCF	4	DELTA - ALPHA	1	-0.175928	0.0170927	-0.173586	0.0258486	-0.200999	0.0258486	-0.0502498	0.00646215	Not corrected	0.000448949	0	Non significant
SARS-CoV-2	396	400	YADSF	4	DELTA - ALPHA	1	-0.150186	0.0237077	-0.0278557	0.0506161	-0.0148749	0.0506161	-0.00371874	0.012654	Not corrected	0.682126	0	Non significant
SARS-CoV-2	400	406	FVIRGDE	6	DELTA - ALPHA	1	-0.139494	0.0119858	0.0230463	0.00487637	0.0844056	0.00975275	0.0140676	0.00162546	Not corrected	0.00385673	0	Non significant
SARS-CoV-2	401	420	VIRGDEVRQIAPGQTGKIAD	18	DELTA - ALPHA	1	-0.139942	0.00906425	0.0487815	0.0119485	0.1555	0.0358455	0.00863887	0.00199142	Not corrected	0.0123404	0	Non significant
SARS-CoV-2	401	421	VIRGDEVRQIAPGQTGKIADY	19	DELTA - ALPHA	1	-0.155353	0.00942741	0.0253057	0.0151843	0.0791331	0.045553	0.0041649	0.00239753	Not corrected	0.304778	0	Non significant
SARS-CoV-2	407	420	VRQIAPGQTGKIAD	12	DELTA - ALPHA	1	-0.123543	0.0127373	-0.0170103	0.0189404	0.00443674	0.0378808	0.000369729	0.00315673	Not corrected	0.869221	0	Non significant
SARS-CoV-2	407	421	VRQIAPGQTGKIADY	13	DELTA - ALPHA	1	-0.148461	0.013367	-0.0162083	0.0375178	-0.0443149	0.112553	-0.00340884	0.00865795	Not corrected	0.608805	0	Non significant
SARS-CoV-2	407	422	VRQIAPGQTGKIADYN	14	DELTA - ALPHA	1	-0.135484	0.0108438	0.0265933	0.0215592	0.0463692	0.0431185	0.00331209	0.00307989	Not corrected	0.188454	0	Non significant
SARS-CoV-2	423	429	YKLPDDF	5	DELTA - ALPHA	1	-0.181856	0.018702	-0.00434233	0.0200577	0.0695586	0.0401154	0.0139117	0.00802307	Not corrected	0.0616452	0	Non significant
SARS-CoV-2	456	467	FRKSNLKPFERD	10	DELTA - ALPHA	1	-0.138925	0.014022	0.0125603	0.0348906	0.0543541	0.0697812	0.00543541	0.00697812	Not corrected	0.362471	0	Non significant
SARS-CoV-2	456	470	FRKSNLKPFERDIST	13	DELTA - ALPHA	1	-0.154623	0.0178828	0.0145737	0.0272588	0.0523454	0.109035	0.00402657	0.00838731	Not corrected	0.511663	0	Non significant
SARS-CoV-2	456	471	FRKSNLKPFERDISTE	14	DELTA - ALPHA	1	-0.158407	0.0164799	-0.0220423	0.0615381	-0.084566	0.184614	-0.00604043	0.0131867	Not corrected	0.558856	0	Non significant
SARS-CoV-2	497	505	FQPTNGVGY	7	DELTA - ALPHA	1	-0.193208	0.0104554	-0.0735132	0.0728719	-0.0570127	0.0728719	-0.00814467	0.0104103	Not corrected	0.506184	0	Non significant
SARS-CoV-2	511	515	VVLSF	4	DELTA - ALPHA	1	-0.180711	0.00857734	0.002647	0.0390028	0.00699987	0.0390028	0.00174997	0.0097507	Not corrected	0.802978	0	Non significant
SARS-CoV-2	516	533	ELLHAPATVCGPKKSTNL	15	DELTA - ALPHA	1	-0.156748	0.00659499	-0.162579	0.0994801	-0.499927	0.29844	-0.0333284	0.019896	Not corrected	0.154655	0	Non significant
SARS-CoV-2	542	552	NFNGLTGTGVL	10	DELTA - ALPHA	1	-0.175609	0.00889202	-0.111297	0.0345807	-0.1189	0.0345807	-0.01189	0.00345807	Not corrected	0.00672574	0	Non significant
SARS-CoV-2	544	552	NGLTGTGVL	8	DELTA - ALPHA	1	-0.159991	0.00709929	-0.014114	0.039412	-0.0363559	0.039412	-0.00454449	0.00492651	Not corrected	0.245765	0	Non significant
SARS-CoV-2	553	565	TESNKKFLPFQQF	11	DELTA - ALPHA	1	-0.209482	0.0142019	-0.0280447	0.0276402	-0.0534154	0.0552804	-0.00485594	0.00502549	Not corrected	0.235956	0	Non significant
SARS-CoV-2	553	568	TESNKKFLPFQQFGRD	14	DELTA - ALPHA	1	-0.188124	0.0161932	-0.0452083	0.0120275	-0.0427724	0.0360826	-0.00305517	0.00257733	Not corrected	0.150306	0	Non significant
SARS-CoV-2	575	582	AVRDPQTL	6	DELTA - ALPHA	1	-0.132307	0.0141636	-0.0999053	0.0299154	-0.175607	0.0598307	-0.0292679	0.00997179	Not corrected	0.0204205	0	Non significant
SARS-CoV-2	575	583	AVRDPQTLE	7	DELTA - ALPHA	1	-0.124506	0.0146927	-0.0880403	0.0438808	-0.174228	0.0877616	-0.0248897	0.0125374	Not corrected	0.043369	0	Non significant
SARS-CoV-2	576	582	VRDPQTL	5	DELTA - ALPHA	1	-0.13008	0.0155258	-0.104235	0.0162799	-0.0840081	0.0162799	-0.0168016	0.00325599	Not corrected	0.00285839	0	Non significant
SARS-CoV-2	586	592	DITPCSF	5	DELTA - ALPHA	1	-0.162956	0.0125552	-0.0439033	0.0654476	-0.00927347	0.0654476	-0.00185469	0.0130895	Not corrected	0.843731	0	Non significant
SARS-CoV-2	605	621	SNQVAVLYQGVNCTEVP	15	DELTA - ALPHA	1	-0.178405	0.00969116	-0.072853	0.0478496	-0.184519	0.143549	-0.0123012	0.00956991	Not corrected	0.1264	0	Non significant
SARS-CoV-2	627	633	DQLTPTW	5	DELTA - ALPHA	1	-0.163394	0.0159993	-0.251872	0.0951335	-0.264785	0.0951335	-0.0529569	0.0190267	Not corrected	0.0204642	0	Non significant
SARS-CoV-2	634	643	RVYSTGSNVF	9	DELTA - ALPHA	1	-0.164904	0.0211951	-0.15666	0.0858599	-0.154551	0.0858599	-0.0171724	0.00953999	Not corrected	0.0945317	0	Non significant
SARS-CoV-2	664	682	IPIGAGICASYQTQTNSPA	16	DELTA - ALPHA	1	-0.177616	0.00932965	-0.0322343	0.0136116	0.014549	0.0408349	0.000909314	0.00255218	Not corrected	0.624869	0	Non significant
SARS-CoV-2	685	691	ASQSIIA	6	DELTA - ALPHA	1	-0.133165	0.00437073	-0.0333967	0.0326995	-0.0535378	0.0326995	-0.00892297	0.00544992	Not corrected	0.10296	0	Non significant
SARS-CoV-2	688	692	SIIAY	4	DELTA - ALPHA	1	-0.154958	0.0102377	-0.0435237	0.0316362	-0.0477812	0.0316362	-0.0119453	0.00790906	Not corrected	0.0874965	0	Non significant
SARS-CoV-2	692	696	YTMSL	4	DELTA - ALPHA	1	-0.163397	0.0134313	-0.009768	0.014619	-0.00668139	0.014619	-0.00167035	0.00365474	Not corrected	0.536728	0	Non significant
SARS-CoV-2	709	727	IAIPTNFTISVTTEILPVS	16	DELTA - ALPHA	1	-0.180729	0.0119485	0.00389733	0.0421054	0.110593	0.168421	0.00691209	0.0105263	Not corrected	0.426629	0	Non significant
SARS-CoV-2	716	720	TISVT	4	DELTA - ALPHA	1	-0.120526	0.00796276	-0.045284	0.0200807	-0.0407487	0.0200807	-0.0101872	0.00502018	Not corrected	0.0461825	0	Non significant
SARS-CoV-2	719	724	VTTEIL	5	DELTA - ALPHA	1	-0.155591	0.00583011	0.055606	0.0539009	0.0617219	0.0539009	0.0123444	0.0107802	Not corrected	0.165529	0	Non significant
SARS-CoV-2	721	727	TEILPVS	5	DELTA - ALPHA	1	-0.152376	0.00880584	-0.0630983	0.0640462	-0.0651391	0.0640462	-0.0130278	0.0128092	Not corrected	0.223802	0	Non significant
SARS-CoV-2	721	728	TEILPVSM	6	DELTA - ALPHA	1	-0.173082	0.00872473	0.0233383	0.0203598	0.0112366	0.0203598	0.00187277	0.00339331	Not corrected	0.456168	0	Non significant
SARS-CoV-2	750	756	LLQYGSF	6	DELTA - ALPHA	1	-0.174403	0.0156828	0.133115	0.0331288	0.10669	0.0331288	0.0177816	0.00552146	Not corrected	0.0317155	0	Non significant
SARS-CoV-2	751	756	LQYGSF	5	DELTA - ALPHA	1	-0.16113	0.0205134	0.109946	0.0126609	0.0885801	0.0126609	0.017716	0.00253218	Not corrected	0.000909406	0	Non significant
SARS-CoV-2	761	768	NRALTGIA	7	DELTA - ALPHA	1	-0.143509	0.00850319	0.116238	0.0297537	0.125338	0.0297537	0.0179054	0.00425052	Not corrected	0.0200156	0	Non significant
SARS-CoV-2	767	779	IAVEQDKNTQEVF	12	DELTA - ALPHA	1	-0.163229	0.0150556	-0.00335467	0.0482958	0.0145374	0.0965915	0.00121145	0.00804929	Not corrected	0.833025	0	Non significant
SARS-CoV-2	769	779	VEQDKNTQEVF	10	DELTA - ALPHA	1	-0.156248	0.0167169	-0.0558917	0.0122219	-0.089157	0.0244437	-0.0089157	0.00244437	Not corrected	0.005492	0	Non significant
SARS-CoV-2	780	793	AQVKQIYKTPPIKD	11	DELTA - ALPHA	1	-0.139201	0.00854851	0.007999	0.0680083	0.0277698	0.136017	0.00252453	0.0123651	Not corrected	0.776622	0	Non significant
SARS-CoV-2	815	819	IEDLL	4	DELTA - ALPHA	1	-0.176246	0.00997294	0.000262333	0.00995779	-0.00937532	0.00995779	-0.00234383	0.00248945	Not corrected	0.281858	0	Non significant
SARS-CoV-2	818	825	LLFNKVTL	7	DELTA - ALPHA	1	-0.200147	0.00872864	0.0261013	0.014166	0.0390817	0.028332	0.0055831	0.00404742	Not corrected	0.149346	0	Non significant
SARS-CoV-2	819	825	LFNKVTL	6	DELTA - ALPHA	1	-0.179981	0.00834346	0.0843337	0.0189329	0.200497	0.0378658	0.0334162	0.00631097	Not corrected	0.0142325	0	Non significant
SARS-CoV-2	820	825	FNKVTL	5	DELTA - ALPHA	1	-0.173174	0.009845	-0.043002	0.0495304	-0.0372238	0.0495304	-0.00744475	0.00990609	Not corrected	0.351783	0	Non significant
SARS-CoV-2	820	829	FNKVTLADAG	9	DELTA - ALPHA	1	-0.144167	0.00995696	-0.0583733	0.0438993	-0.080893	0.0877986	-0.00898811	0.00975539	Not corrected	0.259098	0	Non significant
SARS-CoV-2	820	830	FNKVTLADAGF	10	DELTA - ALPHA	1	-0.185538	0.0135868	0.060244	0.0199144	0.152767	0.0398288	0.0152767	0.00398288	Not corrected	0.0152152	0	Non significant
SARS-CoV-2	821	830	NKVTLADAGF	9	DELTA - ALPHA	1	-0.174774	0.0148374	0.058735	0.047625	0.123321	0.0952501	0.0137024	0.0105833	Not corrected	0.148369	0	Non significant
SARS-CoV-2	826	830	ADAGF	4	DELTA - ALPHA	1	-0.128866	0.0201588	-0.0185803	0.0714108	-0.0295778	0.0714108	-0.00739444	0.0178527	Not corrected	0.569486	0	Non significant
SARS-CoV-2	856	862	TVLPPLL	4	DELTA - ALPHA	1	-0.193223	0.0136785	0.190172	0.0788463	0.215312	0.0788463	0.053828	0.0197116	Not corrected	0.0155442	0	Non significant
SARS-CoV-2	867	874	IAQYTSAL	7	DELTA - ALPHA	1	-0.150626	0.00974554	-0.0361387	0.0132499	-0.0385072	0.0132499	-0.00550103	0.00189284	Not corrected	0.0306486	0	Non significant
SARS-CoV-2	875	882	LAGTITSG	7	DELTA - ALPHA	1	-0.118221	0.00934198	0.06049	0.247474	0.0785612	0.247474	0.011223	0.0353534	Not corrected	0.679644	0	Non significant
SARS-CoV-2	899	903	MAYRF	4	DELTA - ALPHA	1	-0.173537	0.0211644	-0.00882967	0.01796	-0.00080557	0.01796	-0.000201392	0.00449001	Not corrected	0.952219	0	Non significant
SARS-CoV-2	900	910	AYRFNGIGVTQ	10	DELTA - ALPHA	1	-0.168542	0.00634907	-0.175118	0.0403836	-0.304807	0.0807672	-0.0304807	0.00807672	Not corrected	0.0134011	0	Non significant
SARS-CoV-2	901	913	YRFNGIGVTQNVL	12	DELTA - ALPHA	1	-0.19017	0.0118103	-0.121862	0.0506839	-0.264461	0.101368	-0.0220384	0.00844731	Not corrected	0.0488032	0	Non significant
SARS-CoV-2	904	913	NGIGVTQNVL	9	DELTA - ALPHA	1	-0.158596	0.00754204	-0.136574	0.0399223	-0.134237	0.0399223	-0.0149152	0.00443581	Not corrected	0.0136769	0	Non significant
SARS-CoV-2	906	913	IGVTQNVL	7	DELTA - ALPHA	1	-0.156203	0.006161	-0.0953353	0.0538176	-0.0251632	0.0538176	-0.00359475	0.00768822	Not corrected	0.529064	0	Non significant
SARS-CoV-2	914	919	YENQKL	5	DELTA - ALPHA	1	-0.135388	0.0322989	-0.054756	0.0082628	-0.126846	0.0165256	-0.0253692	0.00330512	Not corrected	0.00333569	0	Non significant
SARS-CoV-2	920	924	IANQF	4	DELTA - ALPHA	1	-0.137571	0.0175842	-0.00394933	0.00965864	0.00239947	0.00965864	0.000599868	0.00241466	Not corrected	0.728622	0	Non significant
SARS-CoV-2	920	935	IANQFNSAIGKIQDSL	15	DELTA - ALPHA	1	-0.189447	0.0127646	0.0655497	0.0396119	0.104255	0.0792238	0.00695031	0.00528159	Not corrected	0.12088	0	Non significant
SARS-CoV-2	925	935	NSAIGKIQDSL	10	DELTA - ALPHA	1	-0.171929	0.0153245	0.093647	0.0343381	0.180497	0.0686762	0.0180497	0.00686762	Not corrected	0.017942	0	Non significant
SARS-CoV-2	928	935	IGKIQDSL	7	DELTA - ALPHA	1	-0.157734	0.00893062	0.137312	0.0443067	0.287698	0.0886134	0.0410997	0.0126591	Not corrected	0.0271972	0	Non significant
SARS-CoV-2	928	942	IGKIQDSLSSTASAL	14	DELTA - ALPHA	1	-0.167243	0.00890184	-0.176386	0.11135	-0.364601	0.222701	-0.026043	0.0159072	Not corrected	0.0726703	0	Non significant
SARS-CoV-2	936	942	SSTASAL	6	DELTA - ALPHA	1	-0.120258	0.0105921	-0.205884	0.0370074	-0.202259	0.0370074	-0.0337098	0.0061679	Not corrected	0.00184979	0	Non significant
SARS-CoV-2	944	952	KLQDVVNQN	8	DELTA - ALPHA	1	-0.162829	0.0130465	0.107085	0.0422712	0.112552	0.0422712	0.014069	0.0052839	Not corrected	0.045952	0	Non significant
SARS-CoV-2	954	958	QALNT	4	DELTA - ALPHA	1	-0.107077	0.0244288	0.0662207	0.0341662	0.0579841	0.0341662	0.014496	0.00854156	Not corrected	0.0754434	0	Non significant
SARS-CoV-2	959	967	LVKQLSSNF	8	DELTA - ALPHA	1	-0.170833	0.00999529	0.0812973	0.0265769	0.170481	0.0531537	0.0213101	0.00664422	Not corrected	0.00858958	0	Non significant
SARS-CoV-2	959	974	LVKQLSSNFGAISSVL	15	DELTA - ALPHA	1	-0.203272	0.00951033	0.118003	0.0263559	0.141514	0.0527119	0.00943429	0.00351413	Not corrected	0.0473719	0	Non significant
SARS-CoV-2	960	967	VKQLSSNF	7	DELTA - ALPHA	1	-0.154664	0.0167104	-0.0301287	0.0182134	-0.0778912	0.0364268	-0.0111273	0.00520382	Not corrected	0.0739903	0	Non significant
SARS-CoV-2	968	974	GAISSVL	6	DELTA - ALPHA	1	-0.161287	0.00616737	0.254597	0.0823638	0.247044	0.0823638	0.0411741	0.0137273	Not corrected	0.0150427	0	Non significant
SARS-CoV-2	988	993	VQIDRL	5	DELTA - ALPHA	1	-0.16005	0.0109934	0.0673057	0.0273256	0.0734216	0.0273256	0.0146843	0.00546511	Not corrected	0.034383	0	Non significant
SARS-CoV-2	988	998	VQIDRLITGRL	10	DELTA - ALPHA	1	-0.192436	0.00935842	0.0149193	0.0218261	-0.00275586	0.0436523	-0.000275586	0.00436523	Not corrected	0.930111	0	Non significant
SARS-CoV-2	990	998	IDRLITGRL	8	DELTA - ALPHA	1	-0.166008	0.0100867	-0.121496	0.0212413	-0.209819	0.0424826	-0.0262274	0.00531033	Not corrected	0.00739765	0	Non significant
SARS-CoV-2	994	998	ITGRL	4	DELTA - ALPHA	1	-0.134791	0.0138682	-0.023582	0.0256233	-0.000184721	0.0256233	-4.61802e-05	0.00640583	Not corrected	0.992014	0	Non significant
SARS-CoV-2	999	1003	QSLQT	4	DELTA - ALPHA	1	-0.145162	0.0369412	-0.112083	0.0304104	-0.109864	0.0304104	-0.0274659	0.0076026	Not corrected	0.00646997	0	Non significant
SARS-CoV-2	1004	1009	YVTQQL	5	DELTA - ALPHA	1	-0.138101	0.0121369	-0.0578457	0.0406846	-0.0632597	0.0406846	-0.0126519	0.00813691	Not corrected	0.135606	0	Non significant
SARS-CoV-2	1013	1017	AEIRA	4	DELTA - ALPHA	1	-0.108182	0.0314649	-0.102662	0.0758497	-0.105584	0.0758497	-0.026396	0.0189624	Not corrected	0.112803	0	Non significant
SARS-CoV-2	1013	1021	AEIRASANL	8	DELTA - ALPHA	1	-0.13689	0.01007	-0.150022	0.176387	-0.147243	0.176387	-0.0184054	0.0220484	Not corrected	0.295281	0	Non significant
SARS-CoV-2	1015	1021	IRASANL	6	DELTA - ALPHA	1	-0.131191	0.00906746	-0.155353	0.0596322	-0.147393	0.0596322	-0.0245655	0.0099387	Not corrected	0.02266	0	Non significant
SARS-CoV-2	1047	1059	MSFPQSAPHGVVF	10	DELTA - ALPHA	1	-0.193687	0.0110732	-0.0324597	0.0214875	-0.113276	0.042975	-0.0113276	0.0042975	Not corrected	0.021364	0	Non significant
SARS-CoV-2	1087	1092	PREGVF	4	DELTA - ALPHA	1	-0.161138	0.0177398	0.002457	0.0341097	0.0314214	0.0341097	0.00785535	0.00852743	Not corrected	0.242067	0	Non significant
SARS-CoV-2	1100	1106	FVTQRNF	6	DELTA - ALPHA	1	-0.151721	0.0157755	-0.214915	0.0978734	-0.173003	0.0978734	-0.0288338	0.0163122	Not corrected	0.0580184	0	Non significant
SARS-CoV-2	1106	1114	FYEPQIITT	7	DELTA - ALPHA	1	-0.160024	0.00692652	0.077021	0.143686	0.0369813	0.143686	0.00528304	0.0205266	Not corrected	0.735832	0	Non significant
SARS-CoV-2	1198	1206	QELGKYEQY	8	DELTA - ALPHA	1	-0.141324	0.0227547	-0.0998927	0.0129812	-0.121631	0.0129812	-0.0152039	0.00162265	Not corrected	0.00134976	0	Non significant
SARS-CoV-2	1221	1225	GSGYI	4	DELTA - ALPHA	1	-0.152733	0.0104651	0.105737	0.0723568	0.0833754	0.0723568	0.0208438	0.0180892	Not corrected	0.208641	0	Non significant
SARS-CoV-2	1235	1242	YVRKDGEW	7	DELTA - ALPHA	1	-0.156149	0.0296421	-0.0537553	0.0923138	-0.0442061	0.0923138	-0.00631516	0.0131877	Not corrected	0.531573	0	Non significant
SARS-CoV-2	1243	1247	VLLST	4	DELTA - ALPHA	1	-0.14069	0.00702853	-0.068006	0.0762026	-0.0756129	0.0762026	-0.0189032	0.0190506	Not corrected	0.221938	0	Non significant
SARS-CoV-2	1243	1248	VLLSTF	5	DELTA - ALPHA	1	-0.181337	0.00776103	0.0294307	0.039101	0.00210324	0.039101	0.000420648	0.0078202	Not corrected	0.941446	0	Non significant
SARS-CoV-2	92	103	FASTEKSNIIRG	11	DELTA - ALPHA	1	-0.13318	0.010058	-0.213539	0.0328898	-0.39015	0.0657797	-0.0354682	0.00597997	Not corrected	0.00359394	0	Protected
SARS-CoV-2	93	103	ASTEKSNIIRG	10	DELTA - ALPHA	1	-0.134219	0.00955481	-0.227388	0.0327266	-0.449263	0.0654532	-0.0449263	0.00654532	Not corrected	0.00335882	0	Protected
SARS-CoV-2	94	103	STEKSNIIRG	9	DELTA - ALPHA	1	-0.134523	0.00903101	-0.190729	0.0349499	-0.371585	0.0698999	-0.0412872	0.00776665	Not corrected	0.00849296	0	Protected
SARS-CoV-2	177	191	MDLEGKQGNFKNLRE	14	DELTA - ALPHA	1	-0.144251	0.0174274	-0.280341	0.0048984	-0.788244	0.0146952	-0.0563031	0.00104966	Not corrected	1.15374e-05	0	Protected
SARS-CoV-2	180	191	EGKQGNFKNLRE	11	DELTA - ALPHA	1	-0.136501	0.0301442	-0.375901	0.0414319	-0.70567	0.0828637	-0.0641518	0.00753307	Not corrected	0.00330105	0	Protected
SARS-CoV-2	200	212	YFKIYSKHTPINL	11	DELTA - ALPHA	1	-0.186546	0.013412	-0.141811	0.0204336	-0.401409	0.0613008	-0.0364917	0.0055728	Not corrected	0.0011467	0	Protected
SARS-CoV-2	201	212	FKIYSKHTPINL	10	DELTA - ALPHA	1	-0.176497	0.0100319	-0.200061	0.0234597	-0.552008	0.0703792	-0.0552008	0.00703792	Not corrected	0.000707251	0	Protected
SARS-CoV-2	202	212	KIYSKHTPINL	9	DELTA - ALPHA	1	-0.158086	0.0106702	-0.215189	0.034442	-0.379533	0.068884	-0.0421703	0.00765378	Not corrected	0.00133549	0	Protected
SARS-CoV-2	243	264	ALHRSYLTPGDSSSGWTAGAAA	20	DELTA - ALPHA	1	-0.158031	0.0143889	-0.221828	0.0265902	-0.702885	0.0797705	-0.0351442	0.00398852	Not corrected	0.00205522	0	Protected
SARS-CoV-2	245	264	HRSYLTPGDSSSGWTAGAAA	18	DELTA - ALPHA	1	-0.160752	0.0147555	-0.332418	0.0593555	-0.680308	0.118711	-0.0377949	0.00659506	Not corrected	0.00345693	0	Protected
SARS-CoV-2	899	913	MAYRFNGIGVTQNVL	14	DELTA - ALPHA	1	-0.191847	0.0106409	-0.12491	0.0160747	-0.249266	0.0321494	-0.0178047	0.00229639	Not corrected	0.00628765	0	Protected
SARS-CoV-2	900	913	AYRFNGIGVTQNVL	13	DELTA - ALPHA	1	-0.186878	0.0101519	-0.130291	0.016577	-0.270914	0.0331541	-0.0208395	0.00255031	Not corrected	0.00309423	0	Protected
SARS-CoV-2	453	467	YRLFRKSNLKPFERD	13	DELTA - ALPHA	1	-0.354047	0.0158173	-0.0187483	0.0287204	0.667447	0.114882	0.0513421	0.00883705	Not corrected	0.00150357	0	Deprotected
SARS-CoV-2	849	855	AQKFNGL	6	DELTA - ALPHA	1	-0.156429	0.0167699	0.203166	0.0390294	0.481174	0.0780588	0.0801956	0.0130098	Not corrected	0.00520917	0	Deprotected
SARS-CoV-2	943	958	GKLQDVVNQNAQALNT	15	DELTA - ALPHA	1	-0.438193	0.0114373	0.502901	0.116127	1.21963	0.232255	0.0813084	0.0154836	Not corrected	0.00689756	0	Deprotected
SARS-CoV-2	32	42	FTRGVYYPDKV	9	DELTA - ALPHA	2	-0.158527	0.00889395	-0.0968203	0.0360389	-0.174304	0.0720779	-0.0193671	0.00800865	Not corrected	0.00950751	0	Non significant
SARS-CoV-2	32	43	FTRGVYYPDKVF	10	DELTA - ALPHA	2	-0.185647	0.00999822	0.0119622	0.0402849	0.0921743	0.120855	0.00921743	0.0120855	Not corrected	0.253908	0	Non significant
SARS-CoV-2	32	48	FTRGVYYPDKVFRSSVL	15	DELTA - ALPHA	2	-0.197951	0.00894751	-0.0306336	0.0527477	-0.0287502	0.210991	-0.00191668	0.0140661	Not corrected	0.821195	0	Non significant
SARS-CoV-2	49	54	HSTQDL	5	DELTA - ALPHA	2	-0.118723	0.0221423	-0.136638	0.0330803	-0.0928713	0.0330803	-0.0185743	0.00661607	Not corrected	0.0146489	0	Non significant
SARS-CoV-2	49	55	HSTQDLF	6	DELTA - ALPHA	2	-0.173646	0.00977431	-0.122717	0.0171224	-0.166995	0.0171224	-0.0278324	0.00285373	Not corrected	0.000368773	0	Non significant
SARS-CoV-2	49	56	HSTQDLFL	7	DELTA - ALPHA	2	-0.199999	0.00991602	-0.0902453	0.0578652	-0.0660387	0.0578652	-0.0094341	0.00826646	Not corrected	0.191612	0	Non significant
SARS-CoV-2	85	91	PFNDGVY	5	DELTA - ALPHA	2	-0.146528	0.0124118	-0.0363333	0.111087	-0.0331547	0.111087	-0.00663094	0.0222175	Not corrected	0.718404	0	Non significant
SARS-CoV-2	92	106	FASTEKSNIIRGWIF	14	DELTA - ALPHA	2	-0.228662	0.0200095	-0.0825711	0.0369083	-0.333492	0.110725	-0.0238209	0.00790891	Not corrected	0.0154562	0	Non significant
SARS-CoV-2	104	110	WIFGTTL	6	DELTA - ALPHA	2	-0.223721	0.0143432	-0.0110426	0.0896133	-0.0144315	0.0896133	-0.00240526	0.0149355	Not corrected	0.805233	0	Non significant
SARS-CoV-2	111	117	DSKTQSL	6	DELTA - ALPHA	2	-0.177055	0.0311178	-0.105318	0.0274043	-0.052164	0.0274043	-0.00869399	0.00456738	Not corrected	0.0386866	0	Non significant
SARS-CoV-2	111	118	DSKTQSLL	7	DELTA - ALPHA	2	-0.155983	0.00696976	-0.0079215	0.0183264	0.0444438	0.0366527	0.00634912	0.0052361	Not corrected	0.109837	0	Non significant
SARS-CoV-2	192	199	FVFKNIDG	7	DELTA - ALPHA	2	-0.167853	0.00560461	-0.131578	0.0328249	-0.216995	0.0656498	-0.0309993	0.00937854	Not corrected	0.0218273	0	Non significant
SARS-CoV-2	192	201	FVFKNIDGYF	9	DELTA - ALPHA	2	-0.207222	0.0117518	-0.0875475	0.0192646	-0.163153	0.0385292	-0.0181281	0.00428102	Not corrected	0.00434213	0	Non significant
SARS-CoV-2	195	201	KNIDGYF	6	DELTA - ALPHA	2	-0.167957	0.0163129	-0.270502	0.069971	-0.310346	0.069971	-0.0517244	0.0116618	Not corrected	0.10739	0	Non significant
SARS-CoV-2	265	276	YYVGYLQPRTFL	10	DELTA - ALPHA	2	-0.218062	0.0119135	-0.0192935	0.0140074	-0.0617929	0.0280148	-0.00617929	0.00280148	Not corrected	0.0188413	0	Non significant
SARS-CoV-2	266	276	YVGYLQPRTFL	9	DELTA - ALPHA	2	-0.210793	0.0118796	-0.0721142	0.0151513	-0.122354	0.0303026	-0.0135948	0.00336695	Not corrected	0.00285763	0	Non significant
SARS-CoV-2	267	276	VGYLQPRTFL	8	DELTA - ALPHA	2	-0.207523	0.0122294	-0.130681	0.0280539	-0.144028	0.0561078	-0.0180035	0.00701348	Not corrected	0.0150871	0	Non significant
SARS-CoV-2	269	276	YLQPRTFL	6	DELTA - ALPHA	2	-0.199202	0.00983567	-0.123627	0.0227396	-0.187533	0.0454792	-0.0312555	0.00757987	Not corrected	0.000983438	0	Non significant
SARS-CoV-2	291	303	CALDPLSETKCTL	11	DELTA - ALPHA	2	-0.197943	0.0132823	-0.0431829	0.0590543	-0.0636988	0.118109	-0.0057908	0.0107371	Not corrected	0.395797	0	Non significant
SARS-CoV-2	314	318	QTSNF	4	DELTA - ALPHA	2	-0.119614	0.0181463	-0.0228125	0.0795179	-0.019938	0.0795179	-0.00498449	0.0198795	Not corrected	0.680731	0	Non significant
SARS-CoV-2	388	392	NDLCF	4	DELTA - ALPHA	2	-0.176665	0.0097522	-0.170694	0.0678107	-0.198107	0.0678107	-0.0495268	0.0169527	Not corrected	0.0454414	0	Non significant
SARS-CoV-2	396	400	YADSF	4	DELTA - ALPHA	2	-0.140503	0.014271	-0.0387325	0.0454971	-0.0257518	0.0454971	-0.00643794	0.0113743	Not corrected	0.378379	0	Non significant
SARS-CoV-2	400	406	FVIRGDE	6	DELTA - ALPHA	2	-0.140822	0.00902846	0.0275572	0.0177894	0.0934274	0.0355788	0.0155712	0.0059298	Not corrected	0.00689417	0	Non significant
SARS-CoV-2	401	421	VIRGDEVRQIAPGQTGKIADY	19	DELTA - ALPHA	2	-0.155673	0.00727905	-0.0866167	0.0463469	-0.256634	0.139041	-0.013507	0.00731794	Not corrected	0.0409234	0	Non significant
SARS-CoV-2	407	420	VRQIAPGQTGKIAD	12	DELTA - ALPHA	2	-0.130765	0.01138	-0.127657	0.0496338	-0.216856	0.0992676	-0.0180714	0.0082723	Not corrected	0.0272954	0	Non significant
SARS-CoV-2	407	421	VRQIAPGQTGKIADY	13	DELTA - ALPHA	2	-0.150042	0.00771463	-0.0877952	0.0433689	-0.259075	0.130107	-0.0199289	0.0100082	Not corrected	0.0303828	0	Non significant
SARS-CoV-2	407	422	VRQIAPGQTGKIADYN	14	DELTA - ALPHA	2	-0.138224	0.0077989	-0.078404	0.0519315	-0.163625	0.103863	-0.0116875	0.00741878	Not corrected	0.05713	0	Non significant
SARS-CoV-2	423	429	YKLPDDF	5	DELTA - ALPHA	2	-0.178487	0.0112642	-0.0276279	0.0264757	0.0229875	0.0529514	0.00459749	0.0105903	Not corrected	0.535211	0	Non significant
SARS-CoV-2	456	467	FRKSNLKPFERD	10	DELTA - ALPHA	2	-0.13935	0.010609	-0.0488908	0.0322349	-0.0685482	0.0644697	-0.00685482	0.00644697	Not corrected	0.133417	0	Non significant
SARS-CoV-2	456	470	FRKSNLKPFERDIST	13	DELTA - ALPHA	2	-0.155134	0.011286	-0.0500837	0.0149186	-0.206284	0.0596743	-0.015868	0.00459033	Not corrected	0.0035187	0	Non significant
SARS-CoV-2	497	505	FQPTNGVGY	7	DELTA - ALPHA	2	-0.201475	0.0116926	-0.0991941	0.103647	-0.0826936	0.103647	-0.0118134	0.0148067	Not corrected	0.2334	0	Non significant
SARS-CoV-2	511	515	VVLSF	4	DELTA - ALPHA	2	-0.18764	0.0117551	0.0144013	0.0252835	0.0187541	0.0252835	0.00468853	0.00632087	Not corrected	0.265286	0	Non significant
SARS-CoV-2	544	552	NGLTGTGVL	8	DELTA - ALPHA	2	-0.16705	0.0102484	-0.127926	0.0564984	-0.150168	0.0564984	-0.018771	0.0070623	Not corrected	0.0138877	0	Non significant
SARS-CoV-2	553	565	TESNKKFLPFQQF	11	DELTA - ALPHA	2	-0.211483	0.0110325	-0.035312	0.0763274	-0.06795	0.152655	-0.00617727	0.0138777	Not corrected	0.479338	0	Non significant
SARS-CoV-2	553	568	TESNKKFLPFQQFGRD	14	DELTA - ALPHA	2	-0.189402	0.0108236	-0.0745702	0.0764338	-0.130858	0.229301	-0.00934701	0.0163787	Not corrected	0.377343	0	Non significant
SARS-CoV-2	575	582	AVRDPQTL	6	DELTA - ALPHA	2	-0.127538	0.00601065	-0.106152	0.0303939	-0.1881	0.0607877	-0.03135	0.0101313	Not corrected	0.030814	0	Non significant
SARS-CoV-2	575	583	AVRDPQTLE	7	DELTA - ALPHA	2	-0.12573	0.0111406	-0.0972173	0.0199724	-0.192581	0.0399448	-0.0275116	0.0057064	Not corrected	0.000680827	0	Non significant
SARS-CoV-2	576	582	VRDPQTL	5	DELTA - ALPHA	2	-0.134709	0.0120774	-0.196693	0.0257177	-0.176466	0.0257177	-0.0352933	0.00514353	Not corrected	0.000119672	0	Non significant
SARS-CoV-2	586	592	DITPCSF	5	DELTA - ALPHA	2	-0.16478	0.0105721	-0.218403	0.133789	-0.183773	0.133789	-0.0367546	0.0267578	Not corrected	0.0766539	0	Non significant
SARS-CoV-2	605	621	SNQVAVLYQGVNCTEVP	15	DELTA - ALPHA	2	-0.183279	0.0110895	-0.0354759	0.0386822	-0.0723873	0.116047	-0.00482582	0.00773645	Not corrected	0.342901	0	Non significant
SARS-CoV-2	664	682	IPIGAGICASYQTQTNSPA	16	DELTA - ALPHA	2	-0.183606	0.0106594	-0.0279012	0.0257104	0.0275485	0.0771313	0.00172178	0.00482071	Not corrected	0.564727	0	Non significant
SARS-CoV-2	685	691	ASQSIIA	6	DELTA - ALPHA	2	-0.141769	0.00554002	-0.159082	0.0578332	-0.179223	0.0578332	-0.0298705	0.00963887	Not corrected	0.00526466	0	Non significant
SARS-CoV-2	688	692	SIIAY	4	DELTA - ALPHA	2	-0.15662	0.00814278	-0.0472067	0.0600956	-0.0514643	0.0600956	-0.0128661	0.0150239	Not corrected	0.218927	0	Non significant
SARS-CoV-2	692	696	YTMSL	4	DELTA - ALPHA	2	-0.16359	0.00860361	-0.0664713	0.0846421	-0.0633847	0.0846421	-0.0158462	0.0211605	Not corrected	0.267124	0	Non significant
SARS-CoV-2	709	727	IAIPTNFTISVTTEILPVS	16	DELTA - ALPHA	2	-0.186911	0.00830352	-0.00871758	0.0169907	0.0601337	0.067963	0.00375836	0.00424768	Not corrected	0.197638	0	Non significant
SARS-CoV-2	716	720	TISVT	4	DELTA - ALPHA	2	-0.132192	0.00657907	-0.0629421	0.0125856	-0.0584068	0.0125856	-0.0146017	0.00314639	Not corrected	0.00319996	0	Non significant
SARS-CoV-2	719	724	VTTEIL	5	DELTA - ALPHA	2	-0.165448	0.00957339	-0.17965	0.0275828	-0.173534	0.0275828	-0.0347069	0.00551656	Not corrected	0.000588948	0	Non significant
SARS-CoV-2	721	727	TEILPVS	5	DELTA - ALPHA	2	-0.167735	0.0132601	-0.0438713	0.0247599	-0.045912	0.0247599	-0.00918241	0.00495198	Not corrected	0.0409109	0	Non significant
SARS-CoV-2	721	728	TEILPVSM	6	DELTA - ALPHA	2	-0.189243	0.0160316	-0.0672988	0.0273634	-0.0794006	0.0273634	-0.0132334	0.00456057	Not corrected	0.00479463	0	Non significant
SARS-CoV-2	750	756	LLQYGSF	6	DELTA - ALPHA	2	-0.173251	0.0111659	-0.0833874	0.1113	-0.109813	0.1113	-0.0183022	0.01855	Not corrected	0.169987	0	Non significant
SARS-CoV-2	751	756	LQYGSF	5	DELTA - ALPHA	2	-0.158978	0.0125688	-0.0944282	0.118328	-0.115794	0.118328	-0.0231588	0.0236656	Not corrected	0.161154	0	Non significant
SARS-CoV-2	761	768	NRALTGIA	7	DELTA - ALPHA	2	-0.151374	0.00558175	0.118716	0.0585949	0.127817	0.0585949	0.0182595	0.0083707	Not corrected	0.0186335	0	Non significant
SARS-CoV-2	767	779	IAVEQDKNTQEVF	12	DELTA - ALPHA	2	-0.161949	0.0108332	0.00682642	0.035134	0.0348995	0.0702681	0.00290829	0.00585567	Not corrected	0.513593	0	Non significant
SARS-CoV-2	769	779	VEQDKNTQEVF	10	DELTA - ALPHA	2	-0.152251	0.0105169	-0.0651485	0.0260799	-0.107671	0.0521598	-0.0107671	0.00521598	Not corrected	0.0280159	0	Non significant
SARS-CoV-2	780	793	AQVKQIYKTPPIKD	11	DELTA - ALPHA	2	-0.145563	0.00650414	-0.192755	0.158637	-0.373738	0.317275	-0.0339762	0.0288432	Not corrected	0.114278	0	Non significant
SARS-CoV-2	815	819	IEDLL	4	DELTA - ALPHA	2	-0.181207	0.0102488	-0.0289633	0.0170397	-0.038601	0.0170397	-0.00965025	0.00425992	Not corrected	0.0355059	0	Non significant
SARS-CoV-2	819	825	LFNKVTL	6	DELTA - ALPHA	2	-0.184746	0.00993132	-0.127617	0.0247479	-0.223403	0.0494958	-0.0372339	0.0082493	Not corrected	0.00800425	0	Non significant
SARS-CoV-2	826	830	ADAGF	4	DELTA - ALPHA	2	-0.123368	0.0156737	-0.195435	0.0414122	-0.206433	0.0414122	-0.0516082	0.010353	Not corrected	0.000526519	0	Non significant
SARS-CoV-2	849	855	AQKFNGL	6	DELTA - ALPHA	2	-0.155273	0.0108182	0.113687	0.0611484	0.302216	0.122297	0.0503693	0.0203828	Not corrected	0.0132048	0	Non significant
SARS-CoV-2	867	874	IAQYTSAL	7	DELTA - ALPHA	2	-0.152586	0.00836773	-0.0261074	0.0736284	-0.028476	0.0736284	-0.004068	0.0105183	Not corrected	0.534384	0	Non significant
SARS-CoV-2	875	882	LAGTITSG	7	DELTA - ALPHA	2	-0.129934	0.00739561	0.265631	0.33173	0.283703	0.33173	0.0405289	0.0473901	Not corrected	0.211015	0	Non significant
SARS-CoV-2	899	903	MAYRF	4	DELTA - ALPHA	2	-0.167679	0.0122834	-0.00464508	0.0231363	0.00337901	0.0231363	0.000844753	0.00578408	Not corrected	0.825765	0	Non significant
SARS-CoV-2	899	913	MAYRFNGIGVTQNVL	14	DELTA - ALPHA	2	-0.20046	0.012478	-0.149282	0.0544133	-0.29801	0.108827	-0.0212864	0.00777333	Not corrected	0.0105996	0	Non significant
SARS-CoV-2	900	913	AYRFNGIGVTQNVL	13	DELTA - ALPHA	2	-0.192133	0.0115901	-0.210711	0.0836367	-0.431755	0.167273	-0.0332119	0.0128672	Not corrected	0.0172829	0	Non significant
SARS-CoV-2	901	913	YRFNGIGVTQNVL	12	DELTA - ALPHA	2	-0.197928	0.0110876	-0.184002	0.104525	-0.388741	0.209051	-0.0323951	0.0174209	Not corrected	0.0331739	0	Non significant
SARS-CoV-2	904	913	NGIGVTQNVL	9	DELTA - ALPHA	2	-0.167664	0.0109872	-0.274667	0.124944	-0.272331	0.124944	-0.030259	0.0138827	Not corrected	0.0289258	0	Non significant
SARS-CoV-2	906	913	IGVTQNVL	7	DELTA - ALPHA	2	-0.165767	0.0104325	-0.125511	0.118933	-0.0553386	0.118933	-0.00790552	0.0169904	Not corrected	0.461027	0	Non significant
SARS-CoV-2	914	919	YENQKL	5	DELTA - ALPHA	2	-0.135253	0.0320939	-0.0961226	0.0461883	-0.209579	0.0923766	-0.0419158	0.0184753	Not corrected	0.0255638	0	Non significant
SARS-CoV-2	920	924	IANQF	4	DELTA - ALPHA	2	-0.133849	0.0117693	-0.0343842	0.0194144	-0.0280354	0.0194144	-0.00700886	0.00485361	Not corrected	0.135203	0	Non significant
SARS-CoV-2	920	935	IANQFNSAIGKIQDSL	15	DELTA - ALPHA	2	-0.191678	0.0130323	-0.136256	0.0966301	-0.299357	0.19326	-0.0199571	0.012884	Not corrected	0.0656978	0	Non significant
SARS-CoV-2	925	935	NSAIGKIQDSL	10	DELTA - ALPHA	2	-0.1697	0.0100654	-0.110143	0.0668081	-0.227082	0.133616	-0.0227082	0.0133616	Not corrected	0.0349388	0	Non significant
SARS-CoV-2	928	935	IGKIQDSL	7	DELTA - ALPHA	2	-0.159523	0.00803285	-0.0289232	0.0739396	-0.0447717	0.147879	-0.00639596	0.0211256	Not corrected	0.666494	0	Non significant
SARS-CoV-2	943	958	GKLQDVVNQNAQALNT	15	DELTA - ALPHA	2	-0.437203	0.00800992	0.150986	0.210935	0.515796	0.421869	0.0343864	0.0281246	Not corrected	0.0986006	0	Non significant
SARS-CoV-2	944	952	KLQDVVNQN	8	DELTA - ALPHA	2	-0.164446	0.00877097	-0.0199992	0.262	-0.0145318	0.262	-0.00181648	0.03275	Not corrected	0.926414	0	Non significant
SARS-CoV-2	954	958	QALNT	4	DELTA - ALPHA	2	-0.127863	0.025665	0.0780387	0.106854	0.0698021	0.106854	0.0174505	0.0267134	Not corrected	0.320312	0	Non significant
SARS-CoV-2	959	967	LVKQLSSNF	8	DELTA - ALPHA	2	-0.17436	0.00779681	0.0280751	0.102494	0.0640363	0.204989	0.00800454	0.0256236	Not corrected	0.611133	0	Non significant
SARS-CoV-2	959	974	LVKQLSSNFGAISSVL	15	DELTA - ALPHA	2	-0.214106	0.0142917	-0.0387327	0.168304	-0.171956	0.336608	-0.0114637	0.0224405	Not corrected	0.429195	0	Non significant
SARS-CoV-2	960	967	VKQLSSNF	7	DELTA - ALPHA	2	-0.151469	0.0113039	-0.0359502	0.101417	-0.0895342	0.202833	-0.0127906	0.0289762	Not corrected	0.480158	0	Non significant
SARS-CoV-2	968	974	GAISSVL	6	DELTA - ALPHA	2	-0.169039	0.0101084	0.0297759	0.160258	0.0222229	0.160258	0.00370382	0.0267096	Not corrected	0.81812	0	Non significant
SARS-CoV-2	988	993	VQIDRL	5	DELTA - ALPHA	2	-0.161943	0.0069541	0.0581332	0.179991	0.0642492	0.179991	0.0128498	0.0359982	Not corrected	0.563278	0	Non significant
SARS-CoV-2	988	998	VQIDRLITGRL	10	DELTA - ALPHA	2	-0.200802	0.0110981	0.109984	0.0703662	0.187373	0.140732	0.0187373	0.0140732	Not corrected	0.0766316	0	Non significant
SARS-CoV-2	990	998	IDRLITGRL	8	DELTA - ALPHA	2	-0.169925	0.00796155	-0.0785862	0.0658286	-0.123999	0.131657	-0.0154999	0.0164571	Not corrected	0.181216	0	Non significant
SARS-CoV-2	994	998	ITGRL	4	DELTA - ALPHA	2	-0.141559	0.0113151	-0.0188229	0.0984377	0.00457436	0.0984377	0.00114359	0.0246094	Not corrected	0.938325	0	Non significant
SARS-CoV-2	999	1003	QSLQT	4	DELTA - ALPHA	2	-0.164207	0.0393485	-0.102137	0.0188326	-0.0999183	0.0188326	-0.0249796	0.00470815	Not corrected	0.000697724	0	Non significant
SARS-CoV-2	1004	1009	YVTQQL	5	DELTA - ALPHA	2	-0.138134	0.0083128	-0.127574	0.0237188	-0.132988	0.0237188	-0.0265976	0.00474376	Not corrected	0.010791	0	Non significant
SARS-CoV-2	1013	1017	AEIRA	4	DELTA - ALPHA	2	-0.109117	0.0114967	-0.0316233	0.0197724	-0.0345456	0.0197724	-0.00863641	0.00494309	Not corrected	0.0592285	0	Non significant
SARS-CoV-2	1013	1021	AEIRASANL	8	DELTA - ALPHA	2	-0.14234	0.00676076	-0.187353	0.0619994	-0.184574	0.0619994	-0.0230718	0.00774992	Not corrected	0.02967	0	Non significant
SARS-CoV-2	1015	1021	IRASANL	6	DELTA - ALPHA	2	-0.138986	0.00754201	-0.115215	0.0193312	-0.107255	0.0193312	-0.0178758	0.00322187	Not corrected	0.0004938	0	Non significant
SARS-CoV-2	1047	1059	MSFPQSAPHGVVF	10	DELTA - ALPHA	2	-0.197923	0.013585	0.0192763	0.0365274	-0.00980447	0.0730547	-0.000980447	0.00730547	Not corrected	0.898723	0	Non significant
SARS-CoV-2	1087	1092	PREGVF	4	DELTA - ALPHA	2	-0.158722	0.0117122	-0.113116	0.0196235	-0.0841518	0.0196235	-0.0210379	0.00490588	Not corrected	0.00164605	0	Non significant
SARS-CoV-2	1100	1106	FVTQRNF	6	DELTA - ALPHA	2	-0.145617	0.0110117	-0.31995	0.148142	-0.278037	0.148142	-0.0463395	0.0246903	Not corrected	0.0330781	0	Non significant
SARS-CoV-2	1106	1114	FYEPQIITT	7	DELTA - ALPHA	2	-0.166861	0.012208	-0.123373	0.0809855	-0.163413	0.0809855	-0.0233447	0.0115694	Not corrected	0.0257973	0	Non significant
SARS-CoV-2	1221	1225	GSGYI	4	DELTA - ALPHA	2	-0.156252	0.00686186	0.129296	0.0937395	0.106934	0.0937395	0.0267335	0.0234349	Not corrected	0.126772	0	Non significant
SARS-CoV-2	1235	1242	YVRKDGEW	7	DELTA - ALPHA	2	-0.140849	0.0202937	-0.173912	0.0222578	-0.164363	0.0222578	-0.0234804	0.00317968	Not corrected	6.62274e-05	0	Non significant
SARS-CoV-2	1243	1247	VLLST	4	DELTA - ALPHA	2	-0.149977	0.00741809	-0.148593	0.0373663	-0.1562	0.0373663	-0.03905	0.00934158	Not corrected	0.00089365	0	Non significant
SARS-CoV-2	1243	1248	VLLSTF	5	DELTA - ALPHA	2	-0.18993	0.0126859	-0.157929	0.043983	-0.185257	0.043983	-0.0370513	0.00879661	Not corrected	0.00170737	0	Non significant
SARS-CoV-2	92	103	FASTEKSNIIRG	11	DELTA - ALPHA	2	-0.138215	0.00695662	-0.330475	0.0218519	-0.624022	0.0437038	-0.0567293	0.00397307	Not corrected	7.41678e-06	0	Protected
SARS-CoV-2	93	103	ASTEKSNIIRG	10	DELTA - ALPHA	2	-0.138805	0.00729554	-0.311734	0.0396578	-0.617956	0.0793156	-0.0617956	0.00793156	Not corrected	0.000249098	0	Protected
SARS-CoV-2	94	103	STEKSNIIRG	9	DELTA - ALPHA	2	-0.137479	0.0077369	-0.295852	0.013246	-0.581832	0.0264919	-0.064648	0.00294355	Not corrected	3.00568e-06	0	Protected
SARS-CoV-2	177	186	MDLEGKQGNF	9	DELTA - ALPHA	2	-0.155699	0.0107846	-0.466063	0.0544431	-0.909087	0.108886	-0.10101	0.0120985	Not corrected	0.000118093	0	Protected
SARS-CoV-2	177	191	MDLEGKQGNFKNLRE	14	DELTA - ALPHA	2	-0.147286	0.0110783	-0.46009	0.018533	-1.32749	0.0555991	-0.0948209	0.00397136	Not corrected	5.33332e-07	0	Protected
SARS-CoV-2	180	191	EGKQGNFKNLRE	11	DELTA - ALPHA	2	-0.136737	0.0331538	-0.61133	0.0369238	-1.17653	0.0738476	-0.106957	0.00671342	Not corrected	4.43968e-06	0	Protected
SARS-CoV-2	192	200	FVFKNIDGY	8	DELTA - ALPHA	2	-0.175221	0.0124979	-0.146437	0.0189352	-0.253402	0.0378703	-0.0316752	0.00473379	Not corrected	0.000196525	0	Protected
SARS-CoV-2	200	212	YFKIYSKHTPINL	11	DELTA - ALPHA	2	-0.189215	0.0083809	-0.216855	0.00307586	-0.626542	0.00922759	-0.0569584	0.000838872	Not corrected	2.91501e-07	0	Protected
SARS-CoV-2	201	212	FKIYSKHTPINL	10	DELTA - ALPHA	2	-0.18064	0.00930824	-0.232216	0.0194952	-0.648472	0.0584855	-0.0648472	0.00584855	Not corrected	0.00012596	0	Protected
SARS-CoV-2	202	212	KIYSKHTPINL	9	DELTA - ALPHA	2	-0.166859	0.0072223	-0.311726	0.0133346	-0.572608	0.0266691	-0.0636231	0.00296324	Not corrected	6.97014e-06	0	Protected
SARS-CoV-2	213	220	VRDLPQGF	6	DELTA - ALPHA	2	-0.165236	0.00940667	-0.212992	0.0566191	-0.410976	0.113238	-0.0684959	0.018873	Not corrected	0.00260095	0	Protected
SARS-CoV-2	243	264	ALHRSYLTPGDSSSGWTAGAAA	20	DELTA - ALPHA	2	-0.159293	0.0101608	-0.522441	0.0349447	-1.60472	0.104834	-0.0802362	0.0052417	Not corrected	6.39927e-06	0	Protected
SARS-CoV-2	245	264	HRSYLTPGDSSSGWTAGAAA	18	DELTA - ALPHA	2	-0.159977	0.00984523	-0.767537	0.054295	-1.55055	0.10859	-0.0861415	0.00603278	Not corrected	8.27271e-05	0	Protected
SARS-CoV-2	245	265	HRSYLTPGDSSSGWTAGAAAY	19	DELTA - ALPHA	2	-0.170381	0.0110009	-0.430928	0.0482519	-1.41242	0.144756	-0.0743376	0.00761872	Not corrected	1.54412e-05	0	Protected
SARS-CoV-2	306	313	FTVEKGIY	7	DELTA - ALPHA	2	-0.163422	0.00970961	-0.154218	0.0257963	-0.26126	0.0515926	-0.0373229	0.00737037	Not corrected	0.000481008	0	Protected
SARS-CoV-2	306	317	FTVEKGIYQTSN	11	DELTA - ALPHA	2	-0.1479	0.0097091	-0.287961	0.0355469	-0.566275	0.0710937	-0.0514795	0.00646306	Not corrected	7.26641e-05	0	Protected
SARS-CoV-2	306	318	FTVEKGIYQTSNF	12	DELTA - ALPHA	2	-0.172437	0.0109011	-0.181027	0.022452	-0.282821	0.044904	-0.0235685	0.003742	Not corrected	0.000859089	0	Protected
SARS-CoV-2	318	325	FRVQPTES	6	DELTA - ALPHA	2	-0.130499	0.00775133	-0.239161	0.0550804	-0.282767	0.0550804	-0.0471278	0.00918007	Not corrected	0.00219986	0	Protected
SARS-CoV-2	351	361	YAWNRKRISNC	10	DELTA - ALPHA	2	-0.136835	0.0151076	-0.12649	0.0113894	-0.337365	0.0341681	-0.0337365	0.00341681	Not corrected	0.000196232	0	Protected
SARS-CoV-2	369	374	YNSASF	5	DELTA - ALPHA	2	-0.127667	0.0148197	-0.385838	0.102159	-0.386869	0.102159	-0.0773738	0.0204318	Not corrected	0.00367064	0	Protected
SARS-CoV-2	401	420	VIRGDEVRQIAPGQTGKIAD	18	DELTA - ALPHA	2	-0.141615	0.00980563	-0.121803	0.0406364	-0.356253	0.121909	-0.0197918	0.00677273	Not corrected	0.00648114	0	Protected
SARS-CoV-2	456	471	FRKSNLKPFERDISTE	14	DELTA - ALPHA	2	-0.155977	0.0105355	-0.0859135	0.0201241	-0.276179	0.0603723	-0.0197271	0.00431231	Not corrected	0.000599481	0	Protected
SARS-CoV-2	516	533	ELLHAPATVCGPKKSTNL	15	DELTA - ALPHA	2	-0.167233	0.00763514	-0.247973	0.069518	-0.756107	0.208554	-0.0504071	0.0139036	Not corrected	0.00400984	0	Protected
SARS-CoV-2	542	552	NFNGLTGTGVL	10	DELTA - ALPHA	2	-0.183174	0.0121885	-0.238581	0.0426581	-0.246184	0.0426581	-0.0246184	0.00426581	Not corrected	0.000257486	0	Protected
SARS-CoV-2	627	633	DQLTPTW	5	DELTA - ALPHA	2	-0.163122	0.0112417	-0.517961	0.0683661	-0.530873	0.0683661	-0.106175	0.0136732	Not corrected	0.00101411	0	Protected
SARS-CoV-2	634	643	RVYSTGSNVF	9	DELTA - ALPHA	2	-0.160023	0.0131331	-0.507705	0.0867404	-0.505596	0.0867404	-0.0561774	0.00963783	Not corrected	0.00019378	0	Protected
SARS-CoV-2	818	825	LLFNKVTL	7	DELTA - ALPHA	2	-0.208426	0.0131316	-0.141214	0.0410186	-0.295549	0.0820371	-0.0422213	0.0117196	Not corrected	0.00264377	0	Protected
SARS-CoV-2	820	825	FNKVTL	5	DELTA - ALPHA	2	-0.177128	0.00738041	-0.337701	0.0629645	-0.331923	0.0629645	-0.0663846	0.0125929	Not corrected	0.000548261	0	Protected
SARS-CoV-2	820	829	FNKVTLADAG	9	DELTA - ALPHA	2	-0.144486	0.00746846	-0.374383	0.0304543	-0.712913	0.0609087	-0.0792126	0.00676763	Not corrected	7.27557e-05	0	Protected
SARS-CoV-2	820	830	FNKVTLADAGF	10	DELTA - ALPHA	2	-0.186428	0.0107553	-0.262109	0.00964783	-0.49194	0.0192957	-0.049194	0.00192957	Not corrected	1.35465e-05	0	Protected
SARS-CoV-2	821	830	NKVTLADAGF	9	DELTA - ALPHA	2	-0.171177	0.00962088	-0.262922	0.0309446	-0.519992	0.0618893	-0.0577769	0.00687658	Not corrected	0.0012177	0	Protected
SARS-CoV-2	900	910	AYRFNGIGVTQ	10	DELTA - ALPHA	2	-0.162975	0.0107104	-0.260828	0.0780697	-0.476226	0.156139	-0.0476226	0.0156139	Not corrected	0.00696072	0	Protected
SARS-CoV-2	928	942	IGKIQDSLSSTASAL	14	DELTA - ALPHA	2	-0.170419	0.00968769	-0.586006	0.117724	-1.18384	0.235448	-0.0845601	0.0168177	Not corrected	0.000524799	0	Protected
SARS-CoV-2	936	942	SSTASAL	6	DELTA - ALPHA	2	-0.128864	0.00994082	-0.631394	0.129244	-0.627768	0.129244	-0.104628	0.0215407	Not corrected	0.000932076	0	Protected
SARS-CoV-2	1198	1206	QELGKYEQY	8	DELTA - ALPHA	2	-0.133068	0.0148959	-0.616539	0.0746244	-0.638278	0.0746244	-0.0797847	0.00932805	Not corrected	9.87477e-05	0	Protected
SARS-CoV-2	453	467	YRLFRKSNLKPFERD	13	DELTA - ALPHA	2	-0.352177	0.0099707	-0.0828459	0.0272471	0.411056	0.108988	0.0316197	0.00838373	Not corrected	0.00530625	0	Deprotected
SARS-CoV-2	856	862	TVLPPLL	4	DELTA - ALPHA	2	-0.216159	0.019871	0.214586	0.0503693	0.239726	0.0503693	0.0599314	0.0125923	Not corrected	0.000861695	0	Deprotected
SARS-CoV-2	32	42	FTRGVYYPDKV	9	DELTA - ALPHA	10	-0.152555	0.00481361	-0.0544497	0.0126746	-0.089563	0.0253493	-0.00995144	0.00281659	Not corrected	0.00961502	0	Non significant
SARS-CoV-2	32	43	FTRGVYYPDKVF	10	DELTA - ALPHA	10	-0.179169	0.00781804	0.0180013	0.0191894	0.110292	0.0575681	0.0110292	0.00575681	Not corrected	0.0680939	0	Non significant
SARS-CoV-2	32	48	FTRGVYYPDKVFRSSVL	15	DELTA - ALPHA	10	-0.193256	0.00820856	-0.013735	0.0108903	0.0388441	0.0435611	0.00258961	0.00290407	Not corrected	0.262145	0	Non significant
SARS-CoV-2	49	54	HSTQDL	5	DELTA - ALPHA	10	-0.106481	0.0284768	-0.165814	0.0737787	-0.122047	0.0737787	-0.0244094	0.0147557	Not corrected	0.124252	0	Non significant
SARS-CoV-2	49	55	HSTQDLF	6	DELTA - ALPHA	10	-0.164964	0.00592834	-0.110245	0.0582306	-0.154523	0.0582306	-0.0257538	0.0097051	Not corrected	0.03915	0	Non significant
SARS-CoV-2	49	56	HSTQDLFL	7	DELTA - ALPHA	10	-0.194457	0.00815895	-0.107124	0.0621944	-0.082917	0.0621944	-0.0118453	0.00888491	Not corrected	0.166929	0	Non significant
SARS-CoV-2	85	91	PFNDGVY	5	DELTA - ALPHA	10	-0.134119	0.006228	-0.093913	0.0661778	-0.0907343	0.0661778	-0.0181469	0.0132356	Not corrected	0.131663	0	Non significant
SARS-CoV-2	92	103	FASTEKSNIIRG	11	DELTA - ALPHA	10	-0.132252	0.00535905	-0.36716	0.0594531	-0.697393	0.118906	-0.0633993	0.0108096	Not corrected	0.012211	0	Non significant
SARS-CoV-2	92	106	FASTEKSNIIRGWIF	14	DELTA - ALPHA	10	-0.226246	0.0160177	-0.105897	0.0429796	-0.40347	0.128939	-0.0288193	0.0092099	Not corrected	0.0401188	0	Non significant
SARS-CoV-2	94	103	STEKSNIIRG	9	DELTA - ALPHA	10	-0.132576	0.00524139	-0.365444	0.0672389	-0.721015	0.134478	-0.0801128	0.014942	Not corrected	0.0148026	0	Non significant
SARS-CoV-2	104	110	WIFGTTL	6	DELTA - ALPHA	10	-0.224481	0.0119633	-0.088329	0.106276	-0.091718	0.106276	-0.0152863	0.0177127	Not corrected	0.266826	0	Non significant
SARS-CoV-2	111	117	DSKTQSL	6	DELTA - ALPHA	10	-0.161144	0.0440714	-0.0479103	0.0247624	0.00524354	0.0247624	0.000873923	0.00412706	Not corrected	0.771597	0	Non significant
SARS-CoV-2	111	118	DSKTQSLL	7	DELTA - ALPHA	10	-0.147813	0.00557587	0.057195	0.0302832	0.174677	0.0605664	0.0249538	0.00865234	Not corrected	0.0182413	0	Non significant
SARS-CoV-2	177	186	MDLEGKQGNF	9	DELTA - ALPHA	10	-0.146974	0.00542529	-0.489054	0.0827291	-0.955068	0.165458	-0.106119	0.0183842	Not corrected	0.010352	0	Non significant
SARS-CoV-2	180	191	EGKQGNFKNLRE	11	DELTA - ALPHA	10	-0.115223	0.00401987	-0.743941	0.0865146	-1.44175	0.173029	-0.131068	0.0157299	Not corrected	0.0562301	0	Non significant
SARS-CoV-2	192	200	FVFKNIDGY	8	DELTA - ALPHA	10	-0.166605	0.0107181	-0.158284	0.0531599	-0.277097	0.10632	-0.0346371	0.01329	Not corrected	0.0595057	0	Non significant
SARS-CoV-2	192	201	FVFKNIDGYF	9	DELTA - ALPHA	10	-0.201995	0.0120549	-0.0845533	0.0320879	-0.157164	0.0641759	-0.0174627	0.00713065	Not corrected	0.0545364	0	Non significant
SARS-CoV-2	200	212	YFKIYSKHTPINL	11	DELTA - ALPHA	10	-0.182169	0.0063512	-0.113477	0.0414821	-0.316409	0.124446	-0.0287644	0.0113133	Not corrected	0.060905	0	Non significant
SARS-CoV-2	201	212	FKIYSKHTPINL	10	DELTA - ALPHA	10	-0.177632	0.00553918	-0.154002	0.0317088	-0.413829	0.0951264	-0.0413829	0.00951264	Not corrected	0.0185278	0	Non significant
SARS-CoV-2	202	212	KIYSKHTPINL	9	DELTA - ALPHA	10	-0.161736	0.0034111	-0.180414	0.0394911	-0.309984	0.0789823	-0.0344426	0.00877581	Not corrected	0.0153916	0	Non significant
SARS-CoV-2	243	264	ALHRSYLTPGDSSSGWTAGAAA	20	DELTA - ALPHA	10	-0.152804	0.00671809	-0.423775	0.147419	-1.30873	0.442256	-0.0654363	0.0221128	Not corrected	0.0458043	0	Non significant
SARS-CoV-2	245	264	HRSYLTPGDSSSGWTAGAAA	18	DELTA - ALPHA	10	-0.152425	0.00550013	-0.695673	0.207481	-1.40682	0.414961	-0.0781566	0.0230534	Not corrected	0.0365105	0	Non significant
SARS-CoV-2	245	265	HRSYLTPGDSSSGWTAGAAAY	19	DELTA - ALPHA	10	-0.163632	0.00765998	-0.441031	0.148548	-1.44272	0.445643	-0.0759328	0.0234549	Not corrected	0.0383117	0	Non significant
SARS-CoV-2	265	276	YYVGYLQPRTFL	10	DELTA - ALPHA	10	-0.214727	0.010872	-0.0339863	0.0252502	-0.0911786	0.0505004	-0.00911786	0.00505004	Not corrected	0.063675	0	Non significant
SARS-CoV-2	266	276	YVGYLQPRTFL	9	DELTA - ALPHA	10	-0.208019	0.0114184	-0.0210513	0.0143583	-0.0202279	0.0287166	-0.00224755	0.00319074	Not corrected	0.360365	0	Non significant
SARS-CoV-2	267	276	VGYLQPRTFL	8	DELTA - ALPHA	10	-0.203553	0.010572	-0.047018	0.0653388	0.0232984	0.130678	0.0029123	0.0163347	Not corrected	0.812034	0	Non significant
SARS-CoV-2	269	276	YLQPRTFL	6	DELTA - ALPHA	10	-0.19478	0.00813027	-0.0690563	0.0362149	-0.0783918	0.0724299	-0.0130653	0.0120716	Not corrected	0.22861	0	Non significant
SARS-CoV-2	291	303	CALDPLSETKCTL	11	DELTA - ALPHA	10	-0.196725	0.0108776	0.0862487	0.0319858	0.195164	0.0639717	0.0177422	0.0058156	Not corrected	0.0309217	0	Non significant
SARS-CoV-2	306	313	FTVEKGIY	7	DELTA - ALPHA	10	-0.155509	0.00679311	-0.138858	0.0540549	-0.230542	0.10811	-0.0329345	0.0154443	Not corrected	0.0717035	0	Non significant
SARS-CoV-2	306	317	FTVEKGIYQTSN	11	DELTA - ALPHA	10	-0.141354	0.00562413	-0.273318	0.0952402	-0.536989	0.19048	-0.0488172	0.0173164	Not corrected	0.0415268	0	Non significant
SARS-CoV-2	306	318	FTVEKGIYQTSNF	12	DELTA - ALPHA	10	-0.164946	0.00916927	-0.153922	0.111159	-0.228611	0.222318	-0.0190509	0.0185265	Not corrected	0.258626	0	Non significant
SARS-CoV-2	314	318	QTSNF	4	DELTA - ALPHA	10	-0.104882	0.00489659	0.0175793	0.0708166	0.0204539	0.0708166	0.00511347	0.0177041	Not corrected	0.706819	0	Non significant
SARS-CoV-2	318	325	FRVQPTES	6	DELTA - ALPHA	10	-0.126029	0.00978057	-0.204334	0.118022	-0.247939	0.118022	-0.0413232	0.0196704	Not corrected	0.0753915	0	Non significant
SARS-CoV-2	351	361	YAWNRKRISNC	10	DELTA - ALPHA	10	-0.124486	0.0049972	-0.0938757	0.0699834	-0.239521	0.20995	-0.0239521	0.020995	Not corrected	0.19011	0	Non significant
SARS-CoV-2	369	374	YNSASF	5	DELTA - ALPHA	10	-0.114774	0.00473404	-0.311305	0.120462	-0.312335	0.120462	-0.062467	0.0240924	Not corrected	0.0513602	0	Non significant
SARS-CoV-2	388	392	NDLCF	4	DELTA - ALPHA	10	-0.165359	0.00959072	-0.147189	0.060966	-0.174603	0.060966	-0.0436507	0.0152415	Not corrected	0.0269807	0	Non significant
SARS-CoV-2	396	400	YADSF	4	DELTA - ALPHA	10	-0.128266	0.00385396	-0.0533623	0.048668	-0.0403816	0.048668	-0.0100954	0.012167	Not corrected	0.298879	0	Non significant
SARS-CoV-2	400	406	FVIRGDE	6	DELTA - ALPHA	10	-0.134974	0.0042838	0.00282267	0.00619022	0.0439582	0.0123804	0.00732637	0.00206341	Not corrected	0.00793618	0	Non significant
SARS-CoV-2	401	420	VIRGDEVRQIAPGQTGKIAD	18	DELTA - ALPHA	10	-0.138204	0.00463094	-0.082374	0.101364	-0.237967	0.304092	-0.0132204	0.016894	Not corrected	0.314434	0	Non significant
SARS-CoV-2	401	421	VIRGDEVRQIAPGQTGKIADY	19	DELTA - ALPHA	10	-0.145685	0.00321151	-0.114545	0.0725246	-0.340419	0.217574	-0.0179168	0.0114513	Not corrected	0.204199	0	Non significant
SARS-CoV-2	407	420	VRQIAPGQTGKIAD	12	DELTA - ALPHA	10	-0.133611	0.0182418	-0.120276	0.0585119	-0.202094	0.117024	-0.0168412	0.00975198	Not corrected	0.12203	0	Non significant
SARS-CoV-2	407	421	VRQIAPGQTGKIADY	13	DELTA - ALPHA	10	-0.143264	0.00394353	-0.0750572	0.0609573	-0.220861	0.182872	-0.0169893	0.0140671	Not corrected	0.202246	0	Non significant
SARS-CoV-2	407	422	VRQIAPGQTGKIADYN	14	DELTA - ALPHA	10	-0.13189	0.00383814	-0.0824217	0.0729738	-0.171661	0.145948	-0.0122615	0.0104248	Not corrected	0.216948	0	Non significant
SARS-CoV-2	423	429	YKLPDDF	5	DELTA - ALPHA	10	-0.170544	0.00823383	-0.0658407	0.0282798	-0.053438	0.0565597	-0.0106876	0.0113119	Not corrected	0.283667	0	Non significant
SARS-CoV-2	453	467	YRLFRKSNLKPFERD	13	DELTA - ALPHA	10	-0.343126	0.00356231	-0.026754	0.0283646	0.635424	0.113458	0.0488788	0.00872757	Not corrected	0.0112047	0	Non significant
SARS-CoV-2	456	467	FRKSNLKPFERD	10	DELTA - ALPHA	10	-0.132815	0.0042081	-0.00990933	0.0512619	0.00941477	0.102524	0.000941477	0.0102524	Not corrected	0.902918	0	Non significant
SARS-CoV-2	456	470	FRKSNLKPFERDIST	13	DELTA - ALPHA	10	-0.148529	0.00525404	-0.0472163	0.0360277	-0.194815	0.144111	-0.0149857	0.0110854	Not corrected	0.164342	0	Non significant
SARS-CoV-2	456	471	FRKSNLKPFERDISTE	14	DELTA - ALPHA	10	-0.144251	0.00264799	-0.0737153	0.067234	-0.239585	0.201702	-0.0171132	0.0144073	Not corrected	0.201264	0	Non significant
SARS-CoV-2	497	505	FQPTNGVGY	7	DELTA - ALPHA	10	-0.196153	0.00811872	-0.114993	0.113494	-0.0984925	0.113494	-0.0140704	0.0162135	Not corrected	0.263132	0	Non significant
SARS-CoV-2	511	515	VVLSF	4	DELTA - ALPHA	10	-0.185292	0.0112815	-0.00587633	0.0186371	-0.00152347	0.0186371	-0.000380867	0.00465927	Not corrected	0.912364	0	Non significant
SARS-CoV-2	516	533	ELLHAPATVCGPKKSTNL	15	DELTA - ALPHA	10	-0.162809	0.00207784	-0.216938	0.11854	-0.663003	0.355619	-0.0442002	0.0237079	Not corrected	0.256605	0	Non significant
SARS-CoV-2	542	552	NFNGLTGTGVL	10	DELTA - ALPHA	10	-0.180412	0.01145	-0.267566	0.0559642	-0.275169	0.0559642	-0.0275169	0.00559642	Not corrected	0.0174239	0	Non significant
SARS-CoV-2	544	552	NGLTGTGVL	8	DELTA - ALPHA	10	-0.165686	0.00902907	-0.136426	0.0267338	-0.158668	0.0267338	-0.0198335	0.00334173	Not corrected	0.000880717	0	Non significant
SARS-CoV-2	553	565	TESNKKFLPFQQF	11	DELTA - ALPHA	10	-0.205584	0.0103731	0.0349523	0.0489138	0.0725786	0.0978277	0.00659806	0.00889343	Not corrected	0.367707	0	Non significant
SARS-CoV-2	553	568	TESNKKFLPFQQFGRD	14	DELTA - ALPHA	10	-0.182892	0.00763658	0.023448	0.0192735	0.163197	0.0578204	0.0116569	0.00413003	Not corrected	0.0499675	0	Non significant
SARS-CoV-2	576	582	VRDPQTL	5	DELTA - ALPHA	10	-0.128402	0.00973717	-0.305418	0.0606934	-0.285191	0.0606934	-0.0570382	0.0121387	Not corrected	0.0119245	0	Non significant
SARS-CoV-2	586	592	DITPCSF	5	DELTA - ALPHA	10	-0.159231	0.0108069	-0.264867	0.114573	-0.230237	0.114573	-0.0460474	0.0229145	Not corrected	0.0938668	0	Non significant
SARS-CoV-2	605	621	SNQVAVLYQGVNCTEVP	15	DELTA - ALPHA	10	-0.179324	0.00807221	-0.0798023	0.0647937	-0.205367	0.194381	-0.0136911	0.0129587	Not corrected	0.22607	0	Non significant
SARS-CoV-2	627	633	DQLTPTW	5	DELTA - ALPHA	10	-0.155666	0.0101603	-0.429787	0.1842	-0.442699	0.1842	-0.0885398	0.0368401	Not corrected	0.0656122	0	Non significant
SARS-CoV-2	634	643	RVYSTGSNVF	9	DELTA - ALPHA	10	-0.149503	0.00487976	-0.509553	0.209674	-0.507445	0.209674	-0.0563828	0.0232972	Not corrected	0.0680938	0	Non significant
SARS-CoV-2	664	682	IPIGAGICASYQTQTNSPA	16	DELTA - ALPHA	10	-0.182431	0.00908641	-0.0264233	0.00858494	0.031982	0.0257548	0.00199888	0.00160968	Not corrected	0.189265	0	Non significant
SARS-CoV-2	685	691	ASQSIIA	6	DELTA - ALPHA	10	-0.14194	0.00573164	-0.266154	0.107402	-0.286295	0.107402	-0.0477158	0.0179003	Not corrected	0.0284098	0	Non significant
SARS-CoV-2	688	692	SIIAY	4	DELTA - ALPHA	10	-0.153276	0.00599547	-0.063689	0.0615166	-0.0679466	0.0615166	-0.0169866	0.0153792	Not corrected	0.211561	0	Non significant
SARS-CoV-2	692	696	YTMSL	4	DELTA - ALPHA	10	-0.157866	0.0077899	-0.0574837	0.0373819	-0.0543971	0.0373819	-0.0135993	0.00934548	Not corrected	0.154238	0	Non significant
SARS-CoV-2	709	727	IAIPTNFTISVTTEILPVS	16	DELTA - ALPHA	10	-0.176307	0.00583968	-0.0472022	0.0221409	-0.0938046	0.0885635	-0.00586279	0.00553522	Not corrected	0.224742	0	Non significant
SARS-CoV-2	716	720	TISVT	4	DELTA - ALPHA	10	-0.128049	0.00906002	-0.007331	0.0173755	-0.00279569	0.0173755	-0.000698922	0.00434387	Not corrected	0.821799	0	Non significant
SARS-CoV-2	719	724	VTTEIL	5	DELTA - ALPHA	10	-0.163466	0.00772653	-0.178487	0.0572466	-0.172371	0.0572466	-0.0344742	0.0114493	Not corrected	0.0107127	0	Non significant
SARS-CoV-2	721	727	TEILPVS	5	DELTA - ALPHA	10	-0.171484	0.00760858	-0.0399273	0.018833	-0.0419681	0.018833	-0.00839363	0.00376659	Not corrected	0.0485425	0	Non significant
SARS-CoV-2	721	728	TEILPVSM	6	DELTA - ALPHA	10	-0.19008	0.0116357	-0.0241943	0.0278992	-0.0362961	0.0278992	-0.00604934	0.00464987	Not corrected	0.1419	0	Non significant
SARS-CoV-2	750	756	LLQYGSF	6	DELTA - ALPHA	10	-0.166815	0.0104167	-0.105719	0.0495863	-0.132145	0.0495863	-0.0220242	0.00826439	Not corrected	0.0346761	0	Non significant
SARS-CoV-2	751	756	LQYGSF	5	DELTA - ALPHA	10	-0.147226	0.00815659	-0.129183	0.0735764	-0.150549	0.0735764	-0.0301097	0.0147153	Not corrected	0.0560518	0	Non significant
SARS-CoV-2	761	768	NRALTGIA	7	DELTA - ALPHA	10	-0.14557	0.00419784	0.145364	0.0539422	0.154464	0.0539422	0.0220663	0.00770603	Not corrected	0.0433801	0	Non significant
SARS-CoV-2	767	779	IAVEQDKNTQEVF	12	DELTA - ALPHA	10	-0.153392	0.00582034	0.0154587	0.0407758	0.052164	0.0815516	0.004347	0.00679596	Not corrected	0.398967	0	Non significant
SARS-CoV-2	769	779	VEQDKNTQEVF	10	DELTA - ALPHA	10	-0.143233	0.00426815	-0.043475	0.020961	-0.0643236	0.041922	-0.00643236	0.0041922	Not corrected	0.103173	0	Non significant
SARS-CoV-2	780	793	AQVKQIYKTPPIKD	11	DELTA - ALPHA	10	-0.140693	0.0047058	-0.269556	0.106225	-0.52734	0.212449	-0.04794	0.0193135	Not corrected	0.0574889	0	Non significant
SARS-CoV-2	815	819	IEDLL	4	DELTA - ALPHA	10	-0.177297	0.00996289	-0.0141957	0.0159525	-0.0238333	0.0159525	-0.00595833	0.00398812	Not corrected	0.0961519	0	Non significant
SARS-CoV-2	818	825	LLFNKVTL	7	DELTA - ALPHA	10	-0.207274	0.0110289	-0.142898	0.0943767	-0.298916	0.188753	-0.0427023	0.0269648	Not corrected	0.139123	0	Non significant
SARS-CoV-2	819	825	LFNKVTL	6	DELTA - ALPHA	10	-0.183621	0.00812952	-0.0777077	0.073759	-0.123585	0.147518	-0.0205976	0.0245863	Not corrected	0.328026	0	Non significant
SARS-CoV-2	820	825	FNKVTL	5	DELTA - ALPHA	10	-0.171617	0.00541382	-0.320611	0.174487	-0.314833	0.174487	-0.0629666	0.0348973	Not corrected	0.11021	0	Non significant
SARS-CoV-2	820	829	FNKVTLADAG	9	DELTA - ALPHA	10	-0.143158	0.00370854	-0.20772	0.156268	-0.379586	0.312536	-0.0421763	0.0347262	Not corrected	0.392468	0	Non significant
SARS-CoV-2	820	830	FNKVTLADAGF	10	DELTA - ALPHA	10	-0.181588	0.0100343	-0.196793	0.139033	-0.361308	0.278066	-0.0361308	0.0278066	Not corrected	0.189138	0	Non significant
SARS-CoV-2	821	830	NKVTLADAGF	9	DELTA - ALPHA	10	-0.16659	0.00718026	-0.246397	0.116868	-0.486943	0.233737	-0.0541048	0.0259708	Not corrected	0.0755201	0	Non significant
SARS-CoV-2	826	830	ADAGF	4	DELTA - ALPHA	10	-0.112413	0.00349516	-0.130806	0.0967748	-0.141803	0.0967748	-0.0354509	0.0241937	Not corrected	0.148993	0	Non significant
SARS-CoV-2	867	874	IAQYTSAL	7	DELTA - ALPHA	10	-0.147798	0.00735135	-0.0717267	0.0247939	-0.0740952	0.0247939	-0.010585	0.00354198	Not corrected	0.0109989	0	Non significant
SARS-CoV-2	875	882	LAGTITSG	7	DELTA - ALPHA	10	-0.126321	0.0114378	-0.0303907	0.176407	-0.0123194	0.176407	-0.00175992	0.025201	Not corrected	0.924247	0	Non significant
SARS-CoV-2	899	903	MAYRF	4	DELTA - ALPHA	10	-0.15679	0.00539536	-0.062085	0.0467219	-0.0540609	0.0467219	-0.0135152	0.0116805	Not corrected	0.211041	0	Non significant
SARS-CoV-2	899	913	MAYRFNGIGVTQNVL	14	DELTA - ALPHA	10	-0.197465	0.0117245	-0.230011	0.0712106	-0.459468	0.142421	-0.0328191	0.0101729	Not corrected	0.0234652	0	Non significant
SARS-CoV-2	900	910	AYRFNGIGVTQ	10	DELTA - ALPHA	10	-0.158091	0.00783191	-0.147817	0.108827	-0.250205	0.217654	-0.0250205	0.0217654	Not corrected	0.210794	0	Non significant
SARS-CoV-2	901	913	YRFNGIGVTQNVL	12	DELTA - ALPHA	10	-0.19252	0.0108702	-0.125169	0.06139	-0.271074	0.12278	-0.0225895	0.0102317	Not corrected	0.0531403	0	Non significant
SARS-CoV-2	904	913	NGIGVTQNVL	9	DELTA - ALPHA	10	-0.166262	0.00919886	-0.254303	0.0920829	-0.251967	0.0920829	-0.0279963	0.0102314	Not corrected	0.0149104	0	Non significant
SARS-CoV-2	906	913	IGVTQNVL	7	DELTA - ALPHA	10	-0.164769	0.00770709	-0.150329	0.0532154	-0.0801566	0.0532154	-0.0114509	0.00760221	Not corrected	0.0915024	0	Non significant
SARS-CoV-2	914	919	YENQKL	5	DELTA - ALPHA	10	-0.130401	0.0293339	-0.067589	0.0254425	-0.152512	0.050885	-0.0305024	0.010177	Not corrected	0.0170799	0	Non significant
SARS-CoV-2	920	924	IANQF	4	DELTA - ALPHA	10	-0.12453	0.00518618	-0.0707183	0.0148161	-0.0643695	0.0148161	-0.0160924	0.00370403	Not corrected	0.00306571	0	Non significant
SARS-CoV-2	920	935	IANQFNSAIGKIQDSL	15	DELTA - ALPHA	10	-0.188586	0.0135699	-0.131095	0.0998964	-0.289035	0.199793	-0.019269	0.0133195	Not corrected	0.122556	0	Non significant
SARS-CoV-2	925	935	NSAIGKIQDSL	10	DELTA - ALPHA	10	-0.162475	0.00889492	-0.127555	0.095322	-0.261906	0.190644	-0.0261906	0.0190644	Not corrected	0.167981	0	Non significant
SARS-CoV-2	928	935	IGKIQDSL	7	DELTA - ALPHA	10	-0.151479	0.00418632	-0.0961527	0.0723339	-0.179231	0.144668	-0.0256044	0.0206668	Not corrected	0.136724	0	Non significant
SARS-CoV-2	928	942	IGKIQDSLSSTASAL	14	DELTA - ALPHA	10	-0.166299	0.00989109	-0.538364	0.157775	-1.08856	0.31555	-0.0777541	0.0225393	Not corrected	0.0270548	0	Non significant
SARS-CoV-2	936	942	SSTASAL	6	DELTA - ALPHA	10	-0.118374	0.00939669	-0.703964	0.156123	-0.700338	0.156123	-0.116723	0.0260205	Not corrected	0.0212175	0	Non significant
SARS-CoV-2	943	958	GKLQDVVNQNAQALNT	15	DELTA - ALPHA	10	-0.422645	0.00156519	-0.249005	0.0741821	-0.284185	0.148364	-0.0189457	0.00989094	Not corrected	0.282161	0	Non significant
SARS-CoV-2	944	952	KLQDVVNQN	8	DELTA - ALPHA	10	-0.157249	0.00552099	-0.0891223	0.0783781	-0.083655	0.0783781	-0.0104569	0.00979727	Not corrected	0.232153	0	Non significant
SARS-CoV-2	954	958	QALNT	4	DELTA - ALPHA	10	-0.157702	0.093645	0.0579673	0.0225833	0.0497308	0.0225833	0.0124327	0.00564583	Not corrected	0.0299179	0	Non significant
SARS-CoV-2	959	967	LVKQLSSNF	8	DELTA - ALPHA	10	-0.168852	0.0060324	-0.005612	0.0272102	-0.00333788	0.0544203	-0.000417235	0.00680254	Not corrected	0.934406	0	Non significant
SARS-CoV-2	959	974	LVKQLSSNFGAISSVL	15	DELTA - ALPHA	10	-0.215084	0.0132428	-0.0927103	0.102925	-0.279912	0.205851	-0.0186608	0.0137234	Not corrected	0.13453	0	Non significant
SARS-CoV-2	960	967	VKQLSSNF	7	DELTA - ALPHA	10	-0.142815	0.00281483	-0.0372383	0.0545309	-0.0921105	0.109062	-0.0131586	0.0155802	Not corrected	0.327269	0	Non significant
SARS-CoV-2	968	974	GAISSVL	6	DELTA - ALPHA	10	-0.168495	0.00906061	0.0125967	0.0915302	0.00504369	0.0915302	0.000840615	0.015255	Not corrected	0.940637	0	Non significant
SARS-CoV-2	988	993	VQIDRL	5	DELTA - ALPHA	10	-0.155741	0.0046574	-0.054221	0.0573798	-0.0481051	0.0573798	-0.00962102	0.011476	Not corrected	0.330362	0	Non significant
SARS-CoV-2	988	998	VQIDRLITGRL	10	DELTA - ALPHA	10	-0.196006	0.00975015	0.093254	0.0369649	0.153913	0.0739299	0.0153913	0.00739299	Not corrected	0.0377545	0	Non significant
SARS-CoV-2	990	998	IDRLITGRL	8	DELTA - ALPHA	10	-0.163492	0.00577201	-0.126994	0.0539671	-0.220815	0.107934	-0.0276018	0.0134918	Not corrected	0.0376568	0	Non significant
SARS-CoV-2	994	998	ITGRL	4	DELTA - ALPHA	10	-0.137221	0.0117272	-0.0869787	0.0167822	-0.0635814	0.0167822	-0.0158953	0.00419556	Not corrected	0.0175363	0	Non significant
SARS-CoV-2	999	1003	QSLQT	4	DELTA - ALPHA	10	-0.159463	0.055917	-0.09547	0.0104035	-0.093251	0.0104035	-0.0233127	0.00260088	Not corrected	0.00511304	0	Non significant
SARS-CoV-2	1004	1009	YVTQQL	5	DELTA - ALPHA	10	-0.131622	0.00592262	-0.111013	0.0242	-0.116427	0.0242	-0.0232855	0.00484	Not corrected	0.00215722	0	Non significant
SARS-CoV-2	1013	1017	AEIRA	4	DELTA - ALPHA	10	-0.0913348	0.00767453	-0.0664633	0.0254896	-0.0693856	0.0254896	-0.0173464	0.00637241	Not corrected	0.0514822	0	Non significant
SARS-CoV-2	1013	1021	AEIRASANL	8	DELTA - ALPHA	10	-0.137486	0.0036872	-0.151655	0.0363777	-0.148876	0.0363777	-0.0186095	0.00454722	Not corrected	0.00590812	0	Non significant
SARS-CoV-2	1015	1021	IRASANL	6	DELTA - ALPHA	10	-0.134579	0.00648348	-0.123426	0.0215126	-0.115466	0.0215126	-0.0192443	0.00358543	Not corrected	0.0135526	0	Non significant
SARS-CoV-2	1047	1059	MSFPQSAPHGVVF	10	DELTA - ALPHA	10	-0.194073	0.00999747	0.0106757	0.0410618	-0.0270058	0.0821235	-0.00270058	0.00821235	Not corrected	0.647868	0	Non significant
SARS-CoV-2	1087	1092	PREGVF	4	DELTA - ALPHA	10	-0.147783	0.00317803	-0.121084	0.0525007	-0.0921193	0.0525007	-0.0230298	0.0131252	Not corrected	0.100693	0	Non significant
SARS-CoV-2	1106	1114	FYEPQIITT	7	DELTA - ALPHA	10	-0.165381	0.0114441	-0.0836173	0.145025	-0.123657	0.145025	-0.0176653	0.0207179	Not corrected	0.507504	0	Non significant
SARS-CoV-2	1198	1206	QELGKYEQY	8	DELTA - ALPHA	10	-0.120836	0.00387542	-0.490262	0.217927	-0.512001	0.217927	-0.0640001	0.0272408	Not corrected	0.0696795	0	Non significant
SARS-CoV-2	1221	1225	GSGYI	4	DELTA - ALPHA	10	-0.151127	0.0055846	0.211862	0.0513958	0.1895	0.0513958	0.047375	0.012849	Not corrected	0.0142409	0	Non significant
SARS-CoV-2	1235	1242	YVRKDGEW	7	DELTA - ALPHA	10	-0.125856	0.00219425	-0.0893987	0.0521359	-0.0798494	0.0521359	-0.0114071	0.00744799	Not corrected	0.110638	0	Non significant
SARS-CoV-2	1243	1247	VLLST	4	DELTA - ALPHA	10	-0.149101	0.00690171	-0.0824027	0.0943032	-0.0900096	0.0943032	-0.0225024	0.0235758	Not corrected	0.287659	0	Non significant
SARS-CoV-2	1243	1248	VLLSTF	5	DELTA - ALPHA	10	-0.188376	0.0110236	-0.080653	0.0487649	-0.10798	0.0487649	-0.0215961	0.00975298	Not corrected	0.0328014	0	Non significant
SARS-CoV-2	93	103	ASTEKSNIIRG	10	DELTA - ALPHA	10	-0.133783	0.00489391	-0.370647	0.0561484	-0.735782	0.112297	-0.0735782	0.0112297	Not corrected	0.00101623	0	Protected
SARS-CoV-2	177	191	MDLEGKQGNFKNLRE	14	DELTA - ALPHA	10	-0.138375	0.00440956	-0.528157	0.0896679	-1.53169	0.269004	-0.109407	0.0192146	Not corrected	0.00995112	0	Protected
SARS-CoV-2	192	199	FVFKNIDG	7	DELTA - ALPHA	10	-0.165681	0.00745085	-0.208297	0.0131086	-0.370433	0.0262171	-0.052919	0.0037453	Not corrected	0.00599523	0	Protected
SARS-CoV-2	195	201	KNIDGYF	6	DELTA - ALPHA	10	-0.159204	0.00783163	-0.272058	0.0602174	-0.311902	0.0602174	-0.0519837	0.0100362	Not corrected	0.00152891	0	Protected
SARS-CoV-2	213	220	VRDLPQGF	6	DELTA - ALPHA	10	-0.15943	0.00673219	-0.144601	0.0197212	-0.274194	0.0394425	-0.045699	0.00657375	Not corrected	0.00223492	0	Protected
SARS-CoV-2	575	582	AVRDPQTL	6	DELTA - ALPHA	10	-0.127349	0.00767472	-0.157624	0.0211159	-0.291045	0.0422318	-0.0485076	0.00703863	Not corrected	0.00343039	0	Protected
SARS-CoV-2	575	583	AVRDPQTLE	7	DELTA - ALPHA	10	-0.120201	0.00834653	-0.178705	0.0166963	-0.355558	0.0333926	-0.0507939	0.00477037	Not corrected	9.36585e-05	0	Protected
SARS-CoV-2	900	913	AYRFNGIGVTQNVL	13	DELTA - ALPHA	10	-0.189609	0.0111204	-0.197156	0.032397	-0.404644	0.064794	-0.0311265	0.00498415	Not corrected	0.00557274	0	Protected
SARS-CoV-2	849	855	AQKFNGL	6	DELTA - ALPHA	10	-0.150252	0.00715153	0.211032	0.0579874	0.496905	0.115975	0.0828175	0.0193291	Not corrected	0.0097161	0	Deprotected
SARS-CoV-2	856	862	TVLPPLL	4	DELTA - ALPHA	10	-0.219444	0.0115197	0.387252	0.0182907	0.412392	0.0182907	0.103098	0.00457268	Not corrected	4.84086e-06	0	Deprotected
SARS-CoV-2	32	42	FTRGVYYPDKV	9	DELTA - ALPHA	30	-0.152639	0.00418012	-0.0833007	0.0131698	-0.147265	0.0263397	-0.0163628	0.00292663	Not corrected	0.036219	0	Non significant
SARS-CoV-2	32	43	FTRGVYYPDKVF	10	DELTA - ALPHA	30	-0.183647	0.00548137	0.0109232	0.00979436	0.089057	0.0293831	0.0089057	0.00293831	Not corrected	0.0390886	0	Non significant
SARS-CoV-2	32	48	FTRGVYYPDKVFRSSVL	15	DELTA - ALPHA	30	-0.198269	0.00720008	-0.0291852	0.0083146	-0.0229566	0.0332584	-0.00153044	0.00221723	Not corrected	0.461649	0	Non significant
SARS-CoV-2	49	54	HSTQDL	5	DELTA - ALPHA	30	-0.135587	0.0327054	-0.240792	0.0216238	-0.197025	0.0216238	-0.039405	0.00432477	Not corrected	0.00454513	0	Non significant
SARS-CoV-2	49	55	HSTQDLF	6	DELTA - ALPHA	30	-0.167435	0.004021	-0.0534228	0.0565032	-0.0977007	0.0565032	-0.0162834	0.0094172	Not corrected	0.280249	0	Non significant
SARS-CoV-2	49	56	HSTQDLFL	7	DELTA - ALPHA	30	-0.202107	0.00790334	-0.103432	0.0278344	-0.0792248	0.0278344	-0.0113178	0.00397634	Not corrected	0.0463914	0	Non significant
SARS-CoV-2	85	91	PFNDGVY	5	DELTA - ALPHA	30	-0.136864	0.00498366	-0.0135835	0.149076	-0.0104048	0.149076	-0.00208097	0.0298152	Not corrected	0.950172	0	Non significant
SARS-CoV-2	92	103	FASTEKSNIIRG	11	DELTA - ALPHA	30	-0.139052	0.00600277	-0.301986	0.033419	-0.567045	0.066838	-0.0515496	0.00607618	Not corrected	0.0665916	0	Non significant
SARS-CoV-2	92	106	FASTEKSNIIRGWIF	14	DELTA - ALPHA	30	-0.232799	0.0212139	-0.0294835	0.0241774	-0.17423	0.0725322	-0.012445	0.00518087	Not corrected	0.148525	0	Non significant
SARS-CoV-2	93	103	ASTEKSNIIRG	10	DELTA - ALPHA	30	-0.138548	0.00596487	-0.353026	0.0331556	-0.700538	0.0663112	-0.0700538	0.00663112	Not corrected	0.0459893	0	Non significant
SARS-CoV-2	104	110	WIFGTTL	6	DELTA - ALPHA	30	-0.232809	0.0111317	0.0312718	0.163989	0.0278829	0.163989	0.00464715	0.0273316	Not corrected	0.819998	0	Non significant
SARS-CoV-2	111	117	DSKTQSL	6	DELTA - ALPHA	30	-0.20637	0.0470224	-0.048023	0.049854	0.00513087	0.049854	0.000855146	0.008309	Not corrected	0.919031	0	Non significant
SARS-CoV-2	111	118	DSKTQSLL	7	DELTA - ALPHA	30	-0.151325	0.00404038	-0.00792833	0.00583458	0.0444302	0.0116692	0.00634717	0.00166702	Not corrected	0.0168925	0	Non significant
SARS-CoV-2	192	199	FVFKNIDG	7	DELTA - ALPHA	30	-0.170134	0.0082193	-0.052569	0.0323582	-0.0589772	0.0647165	-0.00842531	0.00924521	Not corrected	0.481761	0	Non significant
SARS-CoV-2	192	200	FVFKNIDGY	8	DELTA - ALPHA	30	-0.172629	0.0106321	-0.0966028	0.0188265	-0.153734	0.0376531	-0.0192167	0.00470663	Not corrected	0.105838	0	Non significant
SARS-CoV-2	192	201	FVFKNIDGYF	9	DELTA - ALPHA	30	-0.209302	0.0124516	-0.0121477	0.0156364	-0.0123531	0.0312728	-0.00137256	0.00347476	Not corrected	0.728506	0	Non significant
SARS-CoV-2	195	201	KNIDGYF	6	DELTA - ALPHA	30	-0.162363	0.00686002	-0.103827	0.0926877	-0.143672	0.0926877	-0.0239453	0.015448	Not corrected	0.317272	0	Non significant
SARS-CoV-2	200	212	YFKIYSKHTPINL	11	DELTA - ALPHA	30	-0.187062	0.0079704	-0.094877	0.0177911	-0.260608	0.0533732	-0.0236916	0.00485211	Not corrected	0.108643	0	Non significant
SARS-CoV-2	201	212	FKIYSKHTPINL	10	DELTA - ALPHA	30	-0.177413	0.00574144	-0.108784	0.0296717	-0.278175	0.0890152	-0.0278175	0.00890152	Not corrected	0.179571	0	Non significant
SARS-CoV-2	213	220	VRDLPQGF	6	DELTA - ALPHA	30	-0.162028	0.00493982	-0.182861	0.0536064	-0.350713	0.107213	-0.0584522	0.0178688	Not corrected	0.156537	0	Non significant
SARS-CoV-2	245	264	HRSYLTPGDSSSGWTAGAAA	18	DELTA - ALPHA	30	-0.155971	0.00646931	-0.586718	0.0940199	-1.18891	0.18804	-0.0660505	0.0104467	Not corrected	0.0755395	0	Non significant
SARS-CoV-2	265	276	YYVGYLQPRTFL	10	DELTA - ALPHA	30	-0.221779	0.010698	-0.0153628	0.0188158	-0.0539316	0.0376317	-0.00539316	0.00376317	Not corrected	0.169293	0	Non significant
SARS-CoV-2	266	276	YVGYLQPRTFL	9	DELTA - ALPHA	30	-0.216448	0.0111379	0.00586533	0.00140682	0.0336054	0.00281363	0.00373394	0.000312626	Not corrected	0.000508717	0	Non significant
SARS-CoV-2	267	276	VGYLQPRTFL	8	DELTA - ALPHA	30	-0.210474	0.0123425	-0.0826732	0.0515846	-0.0480119	0.103169	-0.00600149	0.0128962	Not corrected	0.656843	0	Non significant
SARS-CoV-2	269	276	YLQPRTFL	6	DELTA - ALPHA	30	-0.198877	0.00751827	-0.0116743	0.00659545	0.0363722	0.0131909	0.00606203	0.00219848	Not corrected	0.0315954	0	Non significant
SARS-CoV-2	291	303	CALDPLSETKCTL	11	DELTA - ALPHA	30	-0.201768	0.0105615	0.104093	0.0184845	0.230853	0.0369689	0.0209867	0.00336081	Not corrected	0.0850085	0	Non significant
SARS-CoV-2	306	313	FTVEKGIY	7	DELTA - ALPHA	30	-0.159886	0.00615886	-0.126867	0.0250993	-0.20656	0.0501986	-0.0295086	0.00717123	Not corrected	0.0784434	0	Non significant
SARS-CoV-2	306	317	FTVEKGIYQTSN	11	DELTA - ALPHA	30	-0.145499	0.0059487	-0.148348	0.0257536	-0.287047	0.0515072	-0.0260952	0.00468247	Not corrected	0.0867091	0	Non significant
SARS-CoV-2	306	318	FTVEKGIYQTSNF	12	DELTA - ALPHA	30	-0.169407	0.00901678	-0.13115	0.043152	-0.183067	0.086304	-0.0152556	0.007192	Not corrected	0.21368	0	Non significant
SARS-CoV-2	314	318	QTSNF	4	DELTA - ALPHA	30	-0.114664	0.0072638	-0.114203	0.0282934	-0.111329	0.0282934	-0.0278322	0.00707334	Not corrected	0.0142477	0	Non significant
SARS-CoV-2	318	325	FRVQPTES	6	DELTA - ALPHA	30	-0.136406	0.00977691	-0.0742792	0.0632266	-0.117885	0.0632266	-0.0196474	0.0105378	Not corrected	0.216574	0	Non significant
SARS-CoV-2	351	361	YAWNRKRISNC	10	DELTA - ALPHA	30	-0.128674	0.00464042	-0.171493	0.0928773	-0.472373	0.278632	-0.0472373	0.0278632	Not corrected	0.240986	0	Non significant
SARS-CoV-2	369	374	YNSASF	5	DELTA - ALPHA	30	-0.119696	0.00540389	-0.265289	0.0366386	-0.26632	0.0366386	-0.053264	0.00732772	Not corrected	0.067548	0	Non significant
SARS-CoV-2	388	392	NDLCF	4	DELTA - ALPHA	30	-0.171132	0.00853881	-0.170139	0.0641575	-0.197552	0.0641575	-0.0493881	0.0160394	Not corrected	0.16257	0	Non significant
SARS-CoV-2	396	400	YADSF	4	DELTA - ALPHA	30	-0.133219	0.00538242	-0.080503	0.0272894	-0.0675223	0.0272894	-0.0168806	0.00682234	Not corrected	0.168536	0	Non significant
SARS-CoV-2	400	406	FVIRGDE	6	DELTA - ALPHA	30	-0.138218	0.00477081	0.00357733	0.00522027	0.0454676	0.0104405	0.00757793	0.00174009	Not corrected	0.0148702	0	Non significant
SARS-CoV-2	401	420	VIRGDEVRQIAPGQTGKIAD	18	DELTA - ALPHA	30	-0.138589	0.00334756	-0.104709	0.0436703	-0.304971	0.131011	-0.0169429	0.00727839	Not corrected	0.154312	0	Non significant
SARS-CoV-2	401	421	VIRGDEVRQIAPGQTGKIADY	19	DELTA - ALPHA	30	-0.149871	0.00655126	-0.0727195	0.0248176	-0.214942	0.0744529	-0.0113128	0.00391858	Not corrected	0.139444	0	Non significant
SARS-CoV-2	407	420	VRQIAPGQTGKIAD	12	DELTA - ALPHA	30	-0.147336	0.0232382	-0.232671	0.0783212	-0.426885	0.156642	-0.0355738	0.0130535	Not corrected	0.202274	0	Non significant
SARS-CoV-2	407	421	VRQIAPGQTGKIADY	13	DELTA - ALPHA	30	-0.143495	0.0054748	-0.103809	0.0372938	-0.307117	0.111882	-0.0236244	0.00860627	Not corrected	0.166361	0	Non significant
SARS-CoV-2	407	422	VRQIAPGQTGKIADYN	14	DELTA - ALPHA	30	-0.136494	0.00396616	-0.0908965	0.0194111	-0.18861	0.0388222	-0.0134722	0.00277301	Not corrected	0.0187461	0	Non significant
SARS-CoV-2	423	429	YKLPDDF	5	DELTA - ALPHA	30	-0.174142	0.0071605	-0.0162995	0.0163671	0.0456443	0.0327342	0.00912886	0.00654684	Not corrected	0.139757	0	Non significant
SARS-CoV-2	456	467	FRKSNLKPFERD	10	DELTA - ALPHA	30	-0.135275	0.0055525	0.013964	0.0049815	0.0571614	0.00996299	0.00571614	0.000996299	Not corrected	0.0489305	0	Non significant
SARS-CoV-2	456	471	FRKSNLKPFERDISTE	14	DELTA - ALPHA	30	-0.147478	0.00357519	-0.0559987	0.036061	-0.186435	0.108183	-0.0133168	0.00772736	Not corrected	0.30012	0	Non significant
SARS-CoV-2	497	505	FQPTNGVGY	7	DELTA - ALPHA	30	-0.202852	0.00839507	-0.0280692	0.0672286	-0.0115687	0.0672286	-0.00165267	0.00960409	Not corrected	0.814759	0	Non significant
SARS-CoV-2	511	515	VVLSF	4	DELTA - ALPHA	30	-0.191154	0.00976029	-0.0121928	0.00240169	-0.00783997	0.00240169	-0.00195999	0.000600422	Not corrected	0.118702	0	Non significant
SARS-CoV-2	516	533	ELLHAPATVCGPKKSTNL	15	DELTA - ALPHA	30	-0.162147	0.00564648	-0.0710257	0.242354	-0.225265	0.727062	-0.0150177	0.0484708	Not corrected	0.789908	0	Non significant
SARS-CoV-2	542	552	NFNGLTGTGVL	10	DELTA - ALPHA	30	-0.187482	0.00977629	-0.210388	0.0284686	-0.217992	0.0284686	-0.0217992	0.00284686	Not corrected	0.0181505	0	Non significant
SARS-CoV-2	544	552	NGLTGTGVL	8	DELTA - ALPHA	30	-0.169066	0.00716976	-0.172965	0.0683863	-0.195207	0.0683863	-0.0244009	0.00854829	Not corrected	0.106239	0	Non significant
SARS-CoV-2	553	565	TESNKKFLPFQQF	11	DELTA - ALPHA	30	-0.213355	0.0100858	0.0706497	0.013389	0.143973	0.0267779	0.0130885	0.00243436	Not corrected	0.0104883	0	Non significant
SARS-CoV-2	553	568	TESNKKFLPFQQFGRD	14	DELTA - ALPHA	30	-0.187583	0.00877864	0.0967905	0.0225659	0.383224	0.0676976	0.0273731	0.00483555	Not corrected	0.0836299	0	Non significant
SARS-CoV-2	575	582	AVRDPQTL	6	DELTA - ALPHA	30	-0.138376	0.0101168	-0.102961	0.0443749	-0.181719	0.0887497	-0.0302865	0.0147916	Not corrected	0.260804	0	Non significant
SARS-CoV-2	575	583	AVRDPQTLE	7	DELTA - ALPHA	30	-0.131733	0.0101784	-0.154589	0.0296116	-0.307325	0.0592231	-0.0439036	0.00846045	Not corrected	0.041075	0	Non significant
SARS-CoV-2	576	582	VRDPQTL	5	DELTA - ALPHA	30	-0.139378	0.0119879	-0.238623	0.0445326	-0.218397	0.0445326	-0.0436793	0.00890651	Not corrected	0.104769	0	Non significant
SARS-CoV-2	586	592	DITPCSF	5	DELTA - ALPHA	30	-0.16327	0.0100297	-0.373657	0.178926	-0.339027	0.178926	-0.0678054	0.0357852	Not corrected	0.22618	0	Non significant
SARS-CoV-2	605	621	SNQVAVLYQGVNCTEVP	15	DELTA - ALPHA	30	-0.181626	0.00812115	-0.0740485	0.0315591	-0.188105	0.0946774	-0.0125403	0.00631183	Not corrected	0.131674	0	Non significant
SARS-CoV-2	634	643	RVYSTGSNVF	9	DELTA - ALPHA	30	-0.151402	0.0059154	-0.456609	0.114641	-0.4545	0.114641	-0.0505	0.0127379	Not corrected	0.026358	0	Non significant
SARS-CoV-2	664	682	IPIGAGICASYQTQTNSPA	16	DELTA - ALPHA	30	-0.185621	0.00895871	-0.038553	0.0240562	-0.00440698	0.0721687	-0.000275436	0.00451055	Not corrected	0.947649	0	Non significant
SARS-CoV-2	685	691	ASQSIIA	6	DELTA - ALPHA	30	-0.146043	0.00599331	-0.114227	0.109665	-0.134369	0.109665	-0.0223948	0.0182775	Not corrected	0.381596	0	Non significant
SARS-CoV-2	688	692	SIIAY	4	DELTA - ALPHA	30	-0.156536	0.00607528	-0.092731	0.0565209	-0.0969886	0.0565209	-0.0242471	0.0141302	Not corrected	0.294962	0	Non significant
SARS-CoV-2	692	696	YTMSL	4	DELTA - ALPHA	30	-0.16224	0.00762395	-0.0566885	0.0106741	-0.0536019	0.0106741	-0.0134005	0.00266854	Not corrected	0.0179621	0	Non significant
SARS-CoV-2	709	727	IAIPTNFTISVTTEILPVS	16	DELTA - ALPHA	30	-0.179869	0.00757459	-0.00689867	0.0486292	0.0674094	0.194517	0.00421309	0.0121573	Not corrected	0.644881	0	Non significant
SARS-CoV-2	716	720	TISVT	4	DELTA - ALPHA	30	-0.143287	0.0106394	-0.0249347	0.00506224	-0.0203994	0.00506224	-0.00509984	0.00126556	Not corrected	0.0127957	0	Non significant
SARS-CoV-2	719	724	VTTEIL	5	DELTA - ALPHA	30	-0.168314	0.00645451	-0.0879282	0.0152183	-0.0818123	0.0152183	-0.0163625	0.00304365	Not corrected	0.0109783	0	Non significant
SARS-CoV-2	721	727	TEILPVS	5	DELTA - ALPHA	30	-0.171829	0.00547462	-0.078363	0.0131304	-0.0804038	0.0131304	-0.0160808	0.00262608	Not corrected	0.0331745	0	Non significant
SARS-CoV-2	721	728	TEILPVSM	6	DELTA - ALPHA	30	-0.19583	0.0104294	-0.0481897	0.00980875	-0.0602914	0.00980875	-0.0100486	0.00163479	Not corrected	0.00322983	0	Non significant
SARS-CoV-2	750	756	LLQYGSF	6	DELTA - ALPHA	30	-0.173243	0.00973178	-0.126271	0.0175646	-0.152697	0.0175646	-0.0254495	0.00292744	Not corrected	0.0035525	0	Non significant
SARS-CoV-2	751	756	LQYGSF	5	DELTA - ALPHA	30	-0.152458	0.00818145	-0.123676	0.0232497	-0.145042	0.0232497	-0.0290085	0.00464995	Not corrected	0.0760747	0	Non significant
SARS-CoV-2	761	768	NRALTGIA	7	DELTA - ALPHA	30	-0.150098	0.0043043	0.061518	0.0466382	0.0706181	0.0466382	0.0100883	0.0066626	Not corrected	0.322588	0	Non significant
SARS-CoV-2	767	779	IAVEQDKNTQEVF	12	DELTA - ALPHA	30	-0.158841	0.00542758	0.0806602	0.0277102	0.182567	0.0554205	0.0152139	0.00461837	Not corrected	0.118058	0	Non significant
SARS-CoV-2	769	779	VEQDKNTQEVF	10	DELTA - ALPHA	30	-0.14629	0.00367688	-0.0400505	0.029071	-0.0574746	0.058142	-0.00574746	0.0058142	Not corrected	0.327187	0	Non significant
SARS-CoV-2	780	793	AQVKQIYKTPPIKD	11	DELTA - ALPHA	30	-0.143141	0.0049552	-0.206618	0.0878511	-0.401465	0.175702	-0.0364968	0.0159729	Not corrected	0.0882482	0	Non significant
SARS-CoV-2	815	819	IEDLL	4	DELTA - ALPHA	30	-0.184105	0.00856179	-0.0362145	0.0315221	-0.0458522	0.0315221	-0.011463	0.00788053	Not corrected	0.224378	0	Non significant
SARS-CoV-2	818	825	LLFNKVTL	7	DELTA - ALPHA	30	-0.214251	0.010439	-0.0697187	0.00998491	-0.152558	0.0199698	-0.021794	0.00285283	Not corrected	0.0030802	0	Non significant
SARS-CoV-2	819	825	LFNKVTL	6	DELTA - ALPHA	30	-0.187175	0.00778955	-0.0420238	0.0263457	-0.0522177	0.0526915	-0.00870294	0.00878191	Not corrected	0.258292	0	Non significant
SARS-CoV-2	820	825	FNKVTL	5	DELTA - ALPHA	30	-0.173498	0.00487204	-0.239867	0.0281705	-0.234089	0.0281705	-0.0468177	0.0056341	Not corrected	0.00453108	0	Non significant
SARS-CoV-2	820	830	FNKVTLADAGF	10	DELTA - ALPHA	30	-0.185711	0.00976068	-0.102632	0.0441667	-0.172985	0.0883333	-0.0172985	0.00883333	Not corrected	0.274874	0	Non significant
SARS-CoV-2	826	830	ADAGF	4	DELTA - ALPHA	30	-0.117403	0.0050219	-0.087161	0.0379776	-0.0981584	0.0379776	-0.0245396	0.0094944	Not corrected	0.0827008	0	Non significant
SARS-CoV-2	849	855	AQKFNGL	6	DELTA - ALPHA	30	-0.155199	0.00253239	0.164938	0.104872	0.404718	0.209745	0.0674529	0.0349574	Not corrected	0.276133	0	Non significant
SARS-CoV-2	856	862	TVLPPLL	4	DELTA - ALPHA	30	-0.224485	0.00948285	0.260326	0.101064	0.285466	0.101064	0.0713664	0.025266	Not corrected	0.0401662	0	Non significant
SARS-CoV-2	867	874	IAQYTSAL	7	DELTA - ALPHA	30	-0.151129	0.00601591	-0.100359	0.0435537	-0.102727	0.0435537	-0.0146753	0.00622195	Not corrected	0.0502024	0	Non significant
SARS-CoV-2	899	903	MAYRF	4	DELTA - ALPHA	30	-0.160938	0.00510205	0.0212318	0.0469835	0.0292559	0.0469835	0.00731398	0.0117459	Not corrected	0.564793	0	Non significant
SARS-CoV-2	899	913	MAYRFNGIGVTQNVL	14	DELTA - ALPHA	30	-0.205088	0.0106936	-0.124035	0.0999744	-0.247516	0.199949	-0.0176797	0.0142821	Not corrected	0.190186	0	Non significant
SARS-CoV-2	900	910	AYRFNGIGVTQ	10	DELTA - ALPHA	30	-0.159944	0.00756279	-0.327261	0.040001	-0.609092	0.080002	-0.0609092	0.0080002	Not corrected	0.0498293	0	Non significant
SARS-CoV-2	900	913	AYRFNGIGVTQNVL	13	DELTA - ALPHA	30	-0.195456	0.0100779	-0.121217	0.0235733	-0.252767	0.0471466	-0.0194436	0.00362666	Not corrected	0.0157162	0	Non significant
SARS-CoV-2	901	913	YRFNGIGVTQNVL	12	DELTA - ALPHA	30	-0.197512	0.010166	-0.0348992	0.0324946	-0.0905346	0.0649892	-0.00754455	0.00541576	Not corrected	0.297062	0	Non significant
SARS-CoV-2	904	913	NGIGVTQNVL	9	DELTA - ALPHA	30	-0.170798	0.00759602	-0.172778	0.0281163	-0.170441	0.0281163	-0.0189379	0.00312404	Not corrected	0.0846027	0	Non significant
SARS-CoV-2	906	913	IGVTQNVL	7	DELTA - ALPHA	30	-0.171044	0.00682568	-0.0936253	0.0618577	-0.0234532	0.0618577	-0.00335046	0.00883681	Not corrected	0.615773	0	Non significant
SARS-CoV-2	914	919	YENQKL	5	DELTA - ALPHA	30	-0.150664	0.0354947	-0.0528073	0.0137897	-0.122949	0.0275794	-0.0245897	0.00551588	Not corrected	0.0896707	0	Non significant
SARS-CoV-2	920	924	IANQF	4	DELTA - ALPHA	30	-0.130232	0.0057121	-0.0793078	0.0309973	-0.072959	0.0309973	-0.0182398	0.00774933	Not corrected	0.173258	0	Non significant
SARS-CoV-2	920	935	IANQFNSAIGKIQDSL	15	DELTA - ALPHA	30	-0.196953	0.0123228	-0.0546788	0.0716655	-0.136202	0.143331	-0.00908016	0.0095554	Not corrected	0.476681	0	Non significant
SARS-CoV-2	925	935	NSAIGKIQDSL	10	DELTA - ALPHA	30	-0.167166	0.00697732	-0.0740175	0.0405002	-0.154832	0.0810005	-0.0154832	0.00810005	Not corrected	0.0888107	0	Non significant
SARS-CoV-2	928	935	IGKIQDSL	7	DELTA - ALPHA	30	-0.157549	0.00722896	0.024213	0.116174	0.0615008	0.232347	0.00878582	0.0331925	Not corrected	0.81649	0	Non significant
SARS-CoV-2	936	942	SSTASAL	6	DELTA - ALPHA	30	-0.133076	0.0117154	-0.660319	0.0758935	-0.656694	0.0758935	-0.109449	0.0126489	Not corrected	0.0540871	0	Non significant
SARS-CoV-2	943	958	GKLQDVVNQNAQALNT	15	DELTA - ALPHA	30	-0.42635	0.00543121	-0.358363	0.0497598	-0.502902	0.0995195	-0.0335268	0.00663464	Not corrected	0.068067	0	Non significant
SARS-CoV-2	944	952	KLQDVVNQN	8	DELTA - ALPHA	30	-0.158566	0.00504983	-0.103926	0.0517627	-0.0984587	0.0517627	-0.0123073	0.00647034	Not corrected	0.227383	0	Non significant
SARS-CoV-2	959	967	LVKQLSSNF	8	DELTA - ALPHA	30	-0.170558	0.00507789	-0.0392983	0.0268947	-0.0707105	0.0537895	-0.00883882	0.00672369	Not corrected	0.215705	0	Non significant
SARS-CoV-2	959	974	LVKQLSSNFGAISSVL	15	DELTA - ALPHA	30	-0.220476	0.0112914	-0.0862738	0.0723693	-0.267039	0.144739	-0.0178026	0.00964924	Not corrected	0.118602	0	Non significant
SARS-CoV-2	960	967	VKQLSSNF	7	DELTA - ALPHA	30	-0.144668	0.00390193	-0.061463	0.0474488	-0.14056	0.0948976	-0.02008	0.0135568	Not corrected	0.183423	0	Non significant
SARS-CoV-2	968	974	GAISSVL	6	DELTA - ALPHA	30	-0.172209	0.00802196	-0.0453203	0.0503693	-0.0528733	0.0503693	-0.00881222	0.00839489	Not corrected	0.450876	0	Non significant
SARS-CoV-2	988	993	VQIDRL	5	DELTA - ALPHA	30	-0.158545	0.00427878	-0.100383	0.0175569	-0.0942671	0.0175569	-0.0188534	0.00351137	Not corrected	0.0473651	0	Non significant
SARS-CoV-2	988	998	VQIDRLITGRL	10	DELTA - ALPHA	30	-0.20217	0.00887438	-0.0170612	0.133542	-0.0667169	0.267084	-0.00667169	0.0267084	Not corrected	0.745005	0	Non significant
SARS-CoV-2	990	998	IDRLITGRL	8	DELTA - ALPHA	30	-0.16286	0.00340385	-0.227301	0.0531104	-0.421429	0.106221	-0.0526787	0.0132776	Not corrected	0.0778433	0	Non significant
SARS-CoV-2	994	998	ITGRL	4	DELTA - ALPHA	30	-0.147424	0.0134731	-0.0681397	0.018068	-0.0447424	0.018068	-0.0111856	0.00451699	Not corrected	0.136875	0	Non significant
SARS-CoV-2	999	1003	QSLQT	4	DELTA - ALPHA	30	-0.202866	0.0636477	-0.080328	0.0324269	-0.078109	0.0324269	-0.0195272	0.00810672	Not corrected	0.186038	0	Non significant
SARS-CoV-2	1004	1009	YVTQQL	5	DELTA - ALPHA	30	-0.135752	0.00496045	-0.153431	0.0239536	-0.158845	0.0239536	-0.0317691	0.00479072	Not corrected	0.0247829	0	Non significant
SARS-CoV-2	1013	1021	AEIRASANL	8	DELTA - ALPHA	30	-0.140499	0.00344051	-0.17813	0.0281173	-0.175351	0.0281173	-0.0219189	0.00351467	Not corrected	0.0212614	0	Non significant
SARS-CoV-2	1015	1021	IRASANL	6	DELTA - ALPHA	30	-0.143044	0.00807345	-0.132349	0.0311783	-0.124388	0.0311783	-0.0207314	0.00519639	Not corrected	0.0120782	0	Non significant
SARS-CoV-2	1047	1059	MSFPQSAPHGVVF	10	DELTA - ALPHA	30	-0.198164	0.0106018	-0.031891	0.0772097	-0.112139	0.154419	-0.0112139	0.0154419	Not corrected	0.371352	0	Non significant
SARS-CoV-2	1087	1092	PREGVF	4	DELTA - ALPHA	30	-0.150687	0.00401923	-0.0606512	0.0140183	-0.0316868	0.0140183	-0.0079217	0.00350459	Not corrected	0.0540203	0	Non significant
SARS-CoV-2	1100	1106	FVTQRNF	6	DELTA - ALPHA	30	-0.14553	0.00713831	0.101422	0.381754	0.143335	0.381754	0.0238891	0.0636256	Not corrected	0.750388	0	Non significant
SARS-CoV-2	1106	1114	FYEPQIITT	7	DELTA - ALPHA	30	-0.173447	0.0112307	-0.0452535	0.189571	-0.0852932	0.189571	-0.0121847	0.0270816	Not corrected	0.693958	0	Non significant
SARS-CoV-2	1198	1206	QELGKYEQY	8	DELTA - ALPHA	30	-0.125067	0.00366461	-0.338317	0.0803267	-0.360056	0.0803267	-0.045007	0.0100408	Not corrected	0.122842	0	Non significant
SARS-CoV-2	1221	1225	GSGYI	4	DELTA - ALPHA	30	-0.154924	0.00496148	0.235917	0.0233024	0.213555	0.0233024	0.0533887	0.00582561	Not corrected	0.0487073	0	Non significant
SARS-CoV-2	1235	1242	YVRKDGEW	7	DELTA - ALPHA	30	-0.126873	0.00353547	-0.049004	0.0769553	-0.0394548	0.0769553	-0.0056364	0.0109936	Not corrected	0.657833	0	Non significant
SARS-CoV-2	1243	1247	VLLST	4	DELTA - ALPHA	30	-0.154762	0.00596665	-0.154531	0.0366406	-0.162138	0.0366406	-0.0405345	0.00916015	Not corrected	0.0320866	0	Non significant
SARS-CoV-2	1243	1248	VLLSTF	5	DELTA - ALPHA	30	-0.194716	0.00972946	-0.117579	0.0998906	-0.144906	0.0998906	-0.0289813	0.0199781	Not corrected	0.147322	0	Non significant
SARS-CoV-2	94	103	STEKSNIIRG	9	DELTA - ALPHA	30	-0.138879	0.00531046	-0.293551	0.0181105	-0.577229	0.0362211	-0.0641366	0.00402456	Not corrected	0.00119829	0	Protected
SARS-CoV-2	177	186	MDLEGKQGNF	9	DELTA - ALPHA	30	-0.149498	0.00555388	-0.473119	0.0161459	-0.9232	0.0322917	-0.102578	0.00358797	Not corrected	0.0022259	0	Protected
SARS-CoV-2	177	191	MDLEGKQGNFKNLRE	14	DELTA - ALPHA	30	-0.139441	0.00407962	-0.479324	0.0180237	-1.38519	0.0540711	-0.0989424	0.00386222	Not corrected	7.55566e-05	0	Protected
SARS-CoV-2	202	212	KIYSKHTPINL	9	DELTA - ALPHA	30	-0.160011	0.00409616	-0.152155	0.0124613	-0.253466	0.0249225	-0.0281629	0.00276917	Not corrected	0.00974212	0	Protected
SARS-CoV-2	243	264	ALHRSYLTPGDSSSGWTAGAAA	20	DELTA - ALPHA	30	-0.1553	0.00482967	-0.350883	0.00676531	-1.09005	0.0202959	-0.0545025	0.0010148	Not corrected	1.73879e-05	0	Protected
SARS-CoV-2	245	265	HRSYLTPGDSSSGWTAGAAAY	19	DELTA - ALPHA	30	-0.16603	0.00736206	-0.369317	0.0216781	-1.22758	0.0650343	-0.0646095	0.00342286	Not corrected	0.000215711	0	Protected
SARS-CoV-2	456	470	FRKSNLKPFERDIST	13	DELTA - ALPHA	30	-0.145719	0.00606882	-0.0613058	0.00762829	-0.251173	0.0305132	-0.019321	0.00234717	Not corrected	0.00166268	0	Protected
SARS-CoV-2	627	633	DQLTPTW	5	DELTA - ALPHA	30	-0.161176	0.00958993	-0.263738	0.0180571	-0.27665	0.0180571	-0.05533	0.00361141	Not corrected	0.00122576	0	Protected
SARS-CoV-2	821	830	NKVTLADAGF	9	DELTA - ALPHA	30	-0.170097	0.00713238	-0.169942	0.0233994	-0.334032	0.0467989	-0.0371146	0.00519988	Not corrected	0.0033005	0	Protected
SARS-CoV-2	928	942	IGKIQDSLSSTASAL	14	DELTA - ALPHA	30	-0.172447	0.00850432	-0.381742	0.0355043	-0.775313	0.0710086	-0.0553795	0.00507204	Not corrected	0.000851005	0	Protected
SARS-CoV-2	453	467	YRLFRKSNLKPFERD	13	DELTA - ALPHA	30	-0.343414	0.00332372	-0.0135578	0.00410235	0.688209	0.0164094	0.0529391	0.00126226	Not corrected	1.25703e-05	0	Deprotected
