# Supplementary material for: Timeline of changes in spike conformational dynamics in emergent SARS-CoV-2 variants reveal progressive stabilization of trimer stalk with altered NTD dynamics
Source: eLife. 2023 Mar 17;12:e82584. doi: 10.7554/eLife.82584 (PMC10049203; doi:10.7554/eLife.82584)
Supplement: Figure 6—source data 1. [file elife-82584-fig6-data1.xlsx]

## Sheet: Omicron_minus_Delta
Plot Number	Sequence	Start	End	1	2	10	30
1	FTRGVYYPDKV	32	42	0.025	-0.0459	-0.1884	-0.2885
2	FTRGVYYPDKVF	32	43	-0.0924	-0.1001	-0.0889	-0.151
3	FTRGVYYPDKVFRSSVL	32	48	0.1657	0.1166	0.0048	0.0344
4	HSTQDL	49	54	0.0148	0.098	0.1088	0.069
5	HSTQDLF	49	55	0.042	0.1061	0.0923	0.0392
6	HSTQDLFL	49	56	-0.0194	0.1027	0.081	0.0504
7	WIFGTTL	104	110	-0.0438	-0.0079	-0.0338	-0.0609
8	DSKTQSL	111	117	-0.0649	0.0028	-0.0598	-0.0012
9	MDLEGKQGNF	177	186	0.6448	1.1162	1.2099	1.0945
10	MDLEGKQGNFKNLRE	177	191	0.6422	1.1255	0.9136	0.5763
11	EGKQGNFKNLRE	180	191	0.399	0.802	0.5168	0.196
12	FVFKNIDG	192	199	0.0335	0.1898	0.2216	0.0256
13	FVFKNIDGY	192	200	-0.0194	0.1321	0.1517	0.0627
14	FVFKNIDGYF	192	201	-0.0015	0.1447	0.1129	0.0458
15	ALHRSYLTPGDSSSGWTAGAAA	243	264	0.8266	1.9928	1.9408	1.6541
16	HRSYLTPGDSSSGWTAGAAA	245	264	0.434	1.575	1.5349	1.0963
17	HRSYLTPGDSSSGWTAGAAAY	245	265	0.6874	1.7373	1.9554	1.6803
18	YYVGYLQPRTFL	265	276	-0.0281	0.019	-0.0182	0.0538
19	YVGYLQPRTFL	266	276	-0.0089	0.1122	-0.0051	-0.0408
20	VGYLQPRTFL	267	276	-0.0187	0.0345	-0.076	-0.0361
21	YLQPRTFL	269	276	0.0678	0.2538	0.181	0.0982
22	CALDPLSETKCTL	291	303	-0.5784	-0.3688	-0.6608	-0.8752
23	FTVEKGIY	306	313	-0.0608	0.1555	0.0832	-0.0541
24	FTVEKGIYQTSN	306	317	0.3619	0.8831	0.6098	0.2432
25	FTVEKGIYQTSNF	306	318	0.3334	0.8209	0.6472	0.2613
26	QTSNF	314	318	0.1177	0.3207	0.2396	0.2332
27	FRVQPTES	318	325	0.1691	0.5387	0.4501	0.3025
28	NDLCF	388	392	0.1164	0.1875	0.207	0.3212
29	YADSF	396	400	0.0061	0.0459	0.0917	0.1262
30	FVIRGDE	400	406	0.2049	0.2242	0.285	0.2921
31	YKLPDDF	423	429	-0.0873	0.0199	0.0385	0.07
32	FRKSNLKPFERD	456	467	0.3451	0.518	0.4935	0.469
33	FRKSNLKPFERDIST	456	470	0.2804	0.5465	0.5037	0.623
34	FRKSNLKPFERDISTE	456	471	0.285	0.4574	0.4734	0.3991
35	VVLSF	511	515	0.0129	0.03	0.0269	0.0588
36	ELLHAPATVCGPKKSTNL	516	533	0.5372	0.6251	0.0157	-0.364
37	TESNKKFLPFQQF	553	565	-0.0927	0.0161	0.1858	0.2688
38	TESNKKFLPFQQFGRD	553	568	0.13	0.3095	0.5908	0.6624
39	AVRDPQTL	575	582	0.1418	0.1907	0.0275	0.0282
40	AVRDPQTLE	575	583	0.1686	0.1667	0.0921	0.004
41	VRDPQTL	576	582	0.0578	0.1407	0.0225	-0.0245
42	DITPCSF	586	592	0.0074	0.203	0.2064	0.2278
43	DQLTPTW	627	633	0.386	0.6596	0.4333	0.2489
44	RVYSTGSNVF	634	643	0.3427	0.6862	0.5582	0.3983
45	SIIAY	688	692	-0.0159	-0.0653	-0.1919	-0.3016
46	YTMSL	692	696	-0.0413	0.0267	0.1448	0.0786
47	TISVT	716	720	0.0782	0.0944	0.0241	0.0145
48	VTTEIL	719	724	-0.0734	0.0668	0.0923	0.0606
49	TEILPVS	721	727	0.0982	0.08	0.0324	0.0627
50	TEILPVSM	721	728	-0.0406	0.0514	0.0424	-0.0073
51	LLQYGSF	750	756	0.5835	0.6546	0.6297	0.5045
52	LQYGSF	751	756	0.4862	0.6352	0.5967	0.4729
53	IAVEQDKNTQEVF	767	779	-0.1446	-0.2278	-0.3096	-0.225
54	VEQDKNTQEVF	769	779	-0.0715	-0.154	-0.1752	-0.0839
55	LLFNKVTL	818	825	-0.1242	0.3178	0.3929	0.3843
56	LFNKVTL	819	825	0.067	0.4524	0.438	0.3144
57	FNKVTL	820	825	0.0925	0.3674	0.3489	0.2266
58	FNKVTLADAG	820	829	0.088	0.7746	0.6218	0.5453
59	FNKVTLADAGF	820	830	0.0162	0.6551	0.5911	0.2977
60	ADAGF	826	830	0.086	0.2628	0.2196	0.1898
61	IAQYTSAL	867	874	-0.0215	-0.0942	-0.2094	-0.2594
62	YTSAL	870	874	-0.0506	-0.099	-0.1925	-0.2482
63	LAGTITSG	875	882	-0.5495	-0.9155	-0.784	-0.8191
64	MAYRF	899	903	-0.0061	-0.0808	-0.1445	-0.2461
65	AYRFNGIGVTQ	900	910	-0.0759	0.0192	-0.1739	-0.0259
66	MAYRFNGIGVTQNVL	899	913	-0.1057	-0.0559	-0.245	-0.4141
67	AYRFNGIGVTQNVL	900	913	0.0032	0.0069	-0.1866	-0.3171
68	YRFNGIGVTQNVL	901	913	-0.0163	-0.0654	-0.208	-0.3544
69	NGIGVTQNVL	904	913	-0.0117	-0.0078	-0.1163	-0.2401
70	IGVTQNVL	906	913	-0.0866	-0.1315	-0.1738	-0.2014
71	YENQKL	914	919	0.1502	0.2398	0.1818	0.1049
72	IANQF	920	924	0.0141	0.0196	0.0062	-0.0089
73	IANQFNSAIGKIQDSL	920	935	0.0802	0.453	0.4315	0.1324
74	NSAIGKIQDSL	925	935	0.0643	0.4567	0.4396	0.1445
75	IGKIQDSL	928	935	0.0975	0.4681	0.4873	0.159
76	GAISSVL	968	974	0.7602	0.9468	0.6158	0.2763
77	SRLDPPEAE	979	987	0.8099	0.7687	0.2305	0.0226
78	SRLDPPEAEVQ	979	989	1.2933	1.2257	0.7031	0.354
79	VQIDRL	988	993	0.285	0.3299	0.7546	0.8221
80	VQIDRLITGRL	988	998	0.4536	0.4443	1.071	1.5291
81	IDRLITGRL	990	998	-0.0719	-0.2545	-0.0882	0.3311
82	ITGRL	994	998	-0.0262	-0.0848	-0.0535	0.0818
83	QSLQT	999	1003	-0.0641	-0.058	-0.1166	-0.1551
84	YVTQQL	1004	1009	-0.0573	-0.059	-0.0909	-0.1254
85	AEIRASANL	1013	1021	-0.0788	-0.0922	-0.2472	-0.2924
86	IRASANL	1015	1021	-0.1618	-0.2055	-0.2827	-0.2985
87	MSFPQSAPHGVVF	1047	1059	-0.2036	-0.142	-0.1318	-0.0799
88	PREGVF	1087	1092	0.0165	0.093	0.1218	0.0373
89	FVTQRNF	1100	1106	0.0076	0.0654	-0.0243	-0.0615
90	FVTQRNFYEPQIITT	1100	1114	-0.1839	-0.1924	-0.4815	-0.4888
91	FYEPQIITT	1106	1114	-0.3057	-0.2276	-0.1833	-0.0378
92	QELGKYEQY	1198	1206	0.1398	0.5987	0.5607	0.3869
93	YVRKDGEW	1235	1242	0.1098	0.267	0.12	0.1223
94	VLLST	1243	1247	0.1067	0.2203	0.171	0.1466
95	VLLSTF	1243	1248	0.1648	0.3301	0.3319	0.278
