# Supplementary material for: Timeline of changes in spike conformational dynamics in emergent SARS-CoV-2 variants reveal progressive stabilization of trimer stalk with altered NTD dynamics
Source: eLife. 2023 Mar 17;12:e82584. doi: 10.7554/eLife.82584 (PMC10049203; doi:10.7554/eLife.82584)
Supplement: Figure 6—source data 2. [file elife-82584-fig6-data2.xlsx]

## Sheet: Figure 6- Source Data 2- Omicro
Protein	Start	End	Sequence	MaxUptake	State	Exposure	RT_diff_ave	RT_diff_SD	Center_diff_ave	Center_diff_SD	Uptake_diff_ave	Uptake_diff_SD	RU_diff_ave	RU_diff_SD	Correction	Welch_pValue	BH_sig	Significance
SARS-CoV-2	32	42	FTRGVYYPDKV	9	Omicron - DELTA	1	-0.00201633	0.0137359	0.00932233	0.00869789	0.0250868	0.0173958	0.00278742	0.00193286	Not corrected	0.0965451	0	Non significant
SARS-CoV-2	32	43	FTRGVYYPDKVF	10	Omicron - DELTA	1	-0.0123137	0.0154457	-0.026245	0.00948072	-0.0924051	0.0284422	-0.00924051	0.00284422	Not corrected	0.0188921	0	Non significant
SARS-CoV-2	32	48	FTRGVYYPDKVFRSSVL	15	Omicron - DELTA	1	-0.0193073	0.0118726	0.0445543	0.0193226	0.168636	0.0772905	0.0112424	0.0051527	Not corrected	0.0530951	0	Non significant
SARS-CoV-2	49	54	HSTQDL	5	Omicron - DELTA	1	0.010299	0.0201842	0.00778967	0.0142118	0.0159979	0.0142118	0.00319958	0.00284236	Not corrected	0.187739	0	Non significant
SARS-CoV-2	49	55	HSTQDLF	6	Omicron - DELTA	1	-0.001812	0.016035	0.014141	0.0573861	0.0481475	0.0573861	0.00802459	0.00956435	Not corrected	0.305058	0	Non significant
SARS-CoV-2	49	56	HSTQDLFL	7	Omicron - DELTA	1	-0.0235357	0.0118833	-0.0342637	0.0306392	-0.018246	0.0306392	-0.00260658	0.00437703	Not corrected	0.424858	0	Non significant
SARS-CoV-2	85	91	PFNDGVY	5	Omicron - DELTA	1	0.00953333	0.021888	0.0941307	0.0781867	0.119903	0.0781867	0.0239807	0.0156373	Not corrected	0.0972757	0	Non significant
SARS-CoV-2	104	110	WIFGTTL	6	Omicron - DELTA	1	-0.0417263	0.00628103	-0.038326	0.0615801	-0.0342374	0.0615801	-0.00570623	0.0102634	Not corrected	0.48602	0	Non significant
SARS-CoV-2	111	117	DSKTQSL	6	Omicron - DELTA	1	0.006727	0.0264782	-0.0160357	0.0213263	-0.0655439	0.0213263	-0.010924	0.00355439	Not corrected	0.0437447	0	Non significant
SARS-CoV-2	177	186	MDLEGKQGNF	9	Omicron - DELTA	1	0.004557	0.0184494	0.347783	0.0972363	0.659345	0.194473	0.0732605	0.0216081	Not corrected	0.0353733	0	Non significant
SARS-CoV-2	180	191	EGKQGNFKNLRE	11	Omicron - DELTA	1	0.0157437	0.0302094	0.214333	0.0404757	0.405603	0.0809514	0.036873	0.00735922	Not corrected	0.0143679	0	Non significant
SARS-CoV-2	192	199	FVFKNIDG	7	Omicron - DELTA	1	-0.0108287	0.0117205	0.059364	0.0210872	0.031853	0.0421744	0.00455042	0.00602491	Not corrected	0.323095	0	Non significant
SARS-CoV-2	192	200	FVFKNIDGY	8	Omicron - DELTA	1	-0.0148103	0.0190711	0.00771733	0.0265999	-0.0199397	0.0531998	-0.00249246	0.00664997	Not corrected	0.606889	0	Non significant
SARS-CoV-2	192	201	FVFKNIDGYF	9	Omicron - DELTA	1	-0.023775	0.0129097	-0.019999	0.0238926	0.00251662	0.0477851	0.000279625	0.00530946	Not corrected	0.943999	0	Non significant
SARS-CoV-2	195	201	KNIDGYF	6	Omicron - DELTA	1	-0.00729967	0.0208242	-0.0582122	0.041692	0.0583949	0.041692	0.00973249	0.00694867	Not corrected	0.154892	0	Non significant
SARS-CoV-2	245	264	HRSYLTPGDSSSGWTAGAAA	18	Omicron - DELTA	1	-0.00369233	0.0144328	0.226549	0.0915919	0.438776	0.183184	0.0243765	0.0101769	Not corrected	0.0273088	0	Non significant
SARS-CoV-2	265	276	YYVGYLQPRTFL	10	Omicron - DELTA	1	-0.0347087	0.00972203	-0.022278	0.0250397	-0.021888	0.0500795	-0.0021888	0.00500795	Not corrected	0.575239	0	Non significant
SARS-CoV-2	266	276	YVGYLQPRTFL	9	Omicron - DELTA	1	-0.0337467	0.0102766	-0.00723367	0.00609215	-0.0079582	0.0121843	-0.000884245	0.00135381	Not corrected	0.404153	0	Non significant
SARS-CoV-2	267	276	VGYLQPRTFL	8	Omicron - DELTA	1	-0.028924	0.00946735	0.0481007	0.0249176	-0.0194441	0.0498352	-0.00243051	0.0062294	Not corrected	0.59336	0	Non significant
SARS-CoV-2	269	276	YLQPRTFL	6	Omicron - DELTA	1	-0.0210767	0.0108349	0.0642433	0.0502715	0.0628467	0.100543	0.0104745	0.0167572	Not corrected	0.409127	0	Non significant
SARS-CoV-2	306	313	FTVEKGIY	7	Omicron - DELTA	1	-0.00498133	0.0140103	-0.00287133	0.02606	-0.0591033	0.05212	-0.00844333	0.00744572	Not corrected	0.170623	0	Non significant
SARS-CoV-2	306	317	FTVEKGIYQTSN	11	Omicron - DELTA	1	-0.000811333	0.0134266	0.186953	0.0575561	0.370599	0.115112	0.0336909	0.0104648	Not corrected	0.0138177	0	Non significant
SARS-CoV-2	306	318	FTVEKGIYQTSNF	12	Omicron - DELTA	1	-0.010392	0.0159808	0.173817	0.0364679	0.33708	0.0729358	0.02809	0.00607798	Not corrected	0.0132947	0	Non significant
SARS-CoV-2	314	318	QTSNF	4	Omicron - DELTA	1	0.0238563	0.0225337	0.137102	0.06197	0.122068	0.06197	0.030517	0.0154925	Not corrected	0.0508717	0	Non significant
SARS-CoV-2	318	325	FRVQPTES	6	Omicron - DELTA	1	-0.005633	0.0091986	0.156708	0.0308306	0.170004	0.0308306	0.0283339	0.00513844	Not corrected	0.00143565	0	Non significant
SARS-CoV-2	388	392	NDLCF	4	Omicron - DELTA	1	-0.00850067	0.0169178	0.113518	0.0261969	0.11639	0.0261969	0.0290975	0.00654923	Not corrected	0.00316822	0	Non significant
SARS-CoV-2	396	400	YADSF	4	Omicron - DELTA	1	0.02359	0.0236508	-0.0147637	0.0393481	0.00672001	0.0393481	0.00168	0.00983703	Not corrected	0.81576	0	Non significant
SARS-CoV-2	423	429	YKLPDDF	5	Omicron - DELTA	1	-0.00489333	0.0181074	-0.0266157	0.0222723	-0.0877285	0.0445446	-0.0175457	0.00890891	Not corrected	0.0419484	0	Non significant
SARS-CoV-2	456	467	FRKSNLKPFERD	10	Omicron - DELTA	1	0.003453	0.0130212	0.174006	0.0354119	0.346673	0.0708238	0.0346673	0.00708238	Not corrected	0.0150911	0	Non significant
SARS-CoV-2	456	471	FRKSNLKPFERDISTE	14	Omicron - DELTA	1	0.00490333	0.0152567	0.131353	0.0629631	0.41882	0.188889	0.0299157	0.0134921	Not corrected	0.0644004	0	Non significant
SARS-CoV-2	497	505	FQPTNGVGY	7	Omicron - DELTA	1	-0.030755	0.0103329	0.011219	0.0816159	0.00991133	0.0816159	0.0014159	0.0116594	Not corrected	0.903274	0	Non significant
SARS-CoV-2	511	515	VVLSF	4	Omicron - DELTA	1	-0.0319	0.00684212	0.039308	0.0330825	0.0135999	0.0330825	0.00339998	0.00827061	Not corrected	0.596541	0	Non significant
SARS-CoV-2	516	533	ELLHAPATVCGPKKSTNL	15	Omicron - DELTA	1	-0.0216523	0.00300411	0.167726	0.0762377	0.480814	0.228713	0.0320543	0.0152475	Not corrected	0.198849	0	Non significant
SARS-CoV-2	553	568	TESNKKFLPFQQFGRD	14	Omicron - DELTA	1	-0.012962	0.0152618	0.048208	0.0130053	0.129931	0.039016	0.00928079	0.00278686	Not corrected	0.0076763	0	Non significant
SARS-CoV-2	569	574	IADTTD	5	Omicron - DELTA	1	0.0131433	0.00662214	-0.003542	0.0267393	-0.0367817	0.0267393	-0.00735634	0.00534786	Not corrected	0.12315	0	Non significant
SARS-CoV-2	575	582	AVRDPQTL	6	Omicron - DELTA	1	0.005991	0.0135128	0.057601	0.01692	0.146225	0.0338399	0.0243708	0.00563998	Not corrected	0.00514985	0	Non significant
SARS-CoV-2	575	583	AVRDPQTLE	7	Omicron - DELTA	1	0.00333867	0.0138935	0.075751	0.0291243	0.170516	0.0582486	0.0243595	0.00832123	Not corrected	0.0311759	0	Non significant
SARS-CoV-2	576	582	VRDPQTL	5	Omicron - DELTA	1	0.001215	0.0145119	0.0874527	0.0182364	0.0587107	0.0182364	0.0117421	0.00364729	Not corrected	0.0157217	0	Non significant
SARS-CoV-2	586	592	DITPCSF	5	Omicron - DELTA	1	-0.016116	0.012259	0.0686613	0.0631494	0.00927558	0.0631494	0.00185512	0.0126299	Not corrected	0.839091	0	Non significant
SARS-CoV-2	605	621	SNQVAVLYQGVNCTEVP	15	Omicron - DELTA	1	-0.0236663	0.00842686	-0.029713	0.0368337	-0.106242	0.110501	-0.00708282	0.00736673	Not corrected	0.244826	0	Non significant
SARS-CoV-2	634	643	RVYSTGSNVF	9	Omicron - DELTA	1	0.003694	0.0206187	0.291066	0.112464	0.326006	0.112464	0.0362229	0.012496	Not corrected	0.0122786	0	Non significant
SARS-CoV-2	664	682	IPIGAGICASYQTQTNSPA	16	Omicron - DELTA	1	-0.0254947	0.00739532	-0.0760737	0.0138017	-0.218568	0.0414052	-0.0136605	0.00258783	Not corrected	0.0020738	0	Non significant
SARS-CoV-2	688	692	SIIAY	4	Omicron - DELTA	1	-0.015044	0.00917307	-0.00704667	0.0257583	-0.0187209	0.0257583	-0.00468022	0.00643958	Not corrected	0.365378	0	Non significant
SARS-CoV-2	692	696	YTMSL	4	Omicron - DELTA	1	-0.015331	0.0126043	-0.0389897	0.0157393	-0.0425768	0.0157393	-0.0106442	0.00393483	Not corrected	0.023714	0	Non significant
SARS-CoV-2	716	720	TISVT	4	Omicron - DELTA	1	-0.012137	0.00516711	0.090684	0.0191509	0.0799334	0.0191509	0.0199833	0.00478772	Not corrected	0.0073319	0	Non significant
SARS-CoV-2	719	724	VTTEIL	5	Omicron - DELTA	1	-0.0276923	0.00313341	-0.0475877	0.0461868	-0.0789451	0.0461868	-0.015789	0.00923736	Not corrected	0.0931822	0	Non significant
SARS-CoV-2	721	727	TEILPVS	5	Omicron - DELTA	1	-0.0409197	0.00710373	0.0977583	0.0569566	0.105834	0.0569566	0.0211668	0.0113913	Not corrected	0.106145	0	Non significant
SARS-CoV-2	721	728	TEILPVSM	6	Omicron - DELTA	1	-0.0481507	0.00671784	-0.029478	0.0230779	-0.0416197	0.0230779	-0.00693662	0.00384632	Not corrected	0.0623897	0	Non significant
SARS-CoV-2	767	779	IAVEQDKNTQEVF	12	Omicron - DELTA	1	-0.007293	0.0143122	-0.0809023	0.0313519	-0.137947	0.0627038	-0.0114956	0.00522531	Not corrected	0.063298	0	Non significant
SARS-CoV-2	769	779	VEQDKNTQEVF	10	Omicron - DELTA	1	0.00255067	0.0160144	-0.0229713	0.0103601	-0.0727204	0.0207203	-0.00727204	0.00207203	Not corrected	0.0108532	0	Non significant
SARS-CoV-2	818	825	LLFNKVTL	7	Omicron - DELTA	1	-0.0402793	0.00593921	-0.098817	0.0141386	-0.127507	0.0282772	-0.0182153	0.0040396	Not corrected	0.0117718	0	Non significant
SARS-CoV-2	819	825	LFNKVTL	6	Omicron - DELTA	1	-0.0282037	0.00601729	0.00475833	0.0226133	0.0453608	0.0452267	0.00756013	0.00753778	Not corrected	0.216929	0	Non significant
SARS-CoV-2	820	829	FNKVTLADAG	9	Omicron - DELTA	1	-0.009822	0.00857272	0.071921	0.0551526	0.0884603	0.110305	0.00982892	0.0122561	Not corrected	0.295348	0	Non significant
SARS-CoV-2	820	830	FNKVTLADAGF	10	Omicron - DELTA	1	-0.0230307	0.0126627	0.0212167	0.0202926	0.019178	0.0405852	0.0019178	0.00405852	Not corrected	0.53352	0	Non significant
SARS-CoV-2	826	830	ADAGF	4	Omicron - DELTA	1	0.019303	0.019805	0.086483	0.0647117	0.0890006	0.0647117	0.0222501	0.0161779	Not corrected	0.108197	0	Non significant
SARS-CoV-2	867	874	IAQYTSAL	7	Omicron - DELTA	1	-0.0104123	0.00896123	-0.022783	0.0202489	-0.0206494	0.0202489	-0.00294991	0.00289269	Not corrected	0.253351	0	Non significant
SARS-CoV-2	870	874	YTSAL	4	Omicron - DELTA	1	0.00347433	0.0122519	-0.046205	0.0157426	-0.049267	0.0157426	-0.0123168	0.00393565	Not corrected	0.0210414	0	Non significant
SARS-CoV-2	875	882	LAGTITSG	7	Omicron - DELTA	1	-0.00956833	0.00743457	-0.514755	0.247682	-0.514235	0.247682	-0.0734621	0.0353832	Not corrected	0.0857289	0	Non significant
SARS-CoV-2	899	903	MAYRF	4	Omicron - DELTA	1	0.00406	0.0207134	-0.0174577	0.0152092	-0.00567519	0.0152092	-0.0014188	0.00380229	Not corrected	0.628714	0	Non significant
SARS-CoV-2	899	913	MAYRFNGIGVTQNVL	14	Omicron - DELTA	1	-0.031906	0.00843818	-0.0874243	0.0337041	-0.102914	0.0674082	-0.00735102	0.00481487	Not corrected	0.10586	0	Non significant
SARS-CoV-2	900	910	AYRFNGIGVTQ	10	Omicron - DELTA	1	-0.000484833	0.00403501	-0.026374	0.0292296	-0.0725863	0.0584592	-0.00725863	0.00584592	Not corrected	0.234054	0	Non significant
SARS-CoV-2	900	913	AYRFNGIGVTQNVL	13	Omicron - DELTA	1	-0.029599	0.00852356	0.0107713	0.0228268	0.00103229	0.0456537	7.94069e-05	0.00351182	Not corrected	0.974572	0	Non significant
SARS-CoV-2	901	913	YRFNGIGVTQNVL	12	Omicron - DELTA	1	-0.0278703	0.00969189	-0.003492	0.0507504	-0.0155614	0.101501	-0.00129678	0.0084584	Not corrected	0.83723	0	Non significant
SARS-CoV-2	904	913	NGIGVTQNVL	9	Omicron - DELTA	1	-0.0304317	0.00515387	-0.010519	0.0394509	-0.0127625	0.0394509	-0.00141806	0.00438343	Not corrected	0.659273	0	Non significant
SARS-CoV-2	906	913	IGVTQNVL	7	Omicron - DELTA	1	-0.029376	0.00417945	-0.0755067	0.0483428	-0.0908501	0.0483428	-0.0129786	0.00690612	Not corrected	0.0847396	0	Non significant
SARS-CoV-2	914	919	YENQKL	5	Omicron - DELTA	1	0.00814767	0.0329153	0.0746197	0.0178368	0.150228	0.0356737	0.0300455	0.00713473	Not corrected	0.00886885	0	Non significant
SARS-CoV-2	920	924	IANQF	4	Omicron - DELTA	1	0.00781833	0.0172101	0.018219	0.00871003	0.0130044	0.00871003	0.00325111	0.00217751	Not corrected	0.0988352	0	Non significant
SARS-CoV-2	920	935	IANQFNSAIGKIQDSL	15	Omicron - DELTA	1	-0.0282617	0.0122651	0.0329077	0.0339678	0.0859808	0.0679357	0.00573205	0.00452905	Not corrected	0.15104	0	Non significant
SARS-CoV-2	925	935	NSAIGKIQDSL	10	Omicron - DELTA	1	-0.0113143	0.0145726	0.0367057	0.0244227	0.0653201	0.0488455	0.00653201	0.00488455	Not corrected	0.142909	0	Non significant
SARS-CoV-2	928	935	IGKIQDSL	7	Omicron - DELTA	1	-0.00933167	0.00817102	0.04884	0.033495	0.0943925	0.06699	0.0134846	0.00957001	Not corrected	0.133489	0	Non significant
SARS-CoV-2	990	998	IDRLITGRL	8	Omicron - DELTA	1	-0.0185367	0.00884752	-0.0232347	0.0208472	-0.0695782	0.0416943	-0.00869727	0.00521179	Not corrected	0.0965216	0	Non significant
SARS-CoV-2	994	998	ITGRL	4	Omicron - DELTA	1	-0.00519367	0.0126344	-0.0354273	0.0402225	-0.0281552	0.0402225	-0.00703881	0.0100556	Not corrected	0.36122	0	Non significant
SARS-CoV-2	999	1003	QSLQT	4	Omicron - DELTA	1	-9.33333e-05	0.0376094	-0.0514607	0.0276886	-0.0623387	0.0276886	-0.0155847	0.00692216	Not corrected	0.0381623	0	Non significant
SARS-CoV-2	1004	1009	YVTQQL	5	Omicron - DELTA	1	-0.00322967	0.0116364	-0.0547157	0.00987309	-0.0581681	0.00987309	-0.0116336	0.00197462	Not corrected	0.00131966	0	Non significant
SARS-CoV-2	1013	1017	AEIRA	4	Omicron - DELTA	1	0.00447133	0.0344016	-0.0452437	0.0653458	-0.0297179	0.0653458	-0.00742947	0.0163365	Not corrected	0.554075	0	Non significant
SARS-CoV-2	1015	1021	IRASANL	6	Omicron - DELTA	1	-0.00651533	0.0072684	-0.132624	0.0374163	-0.15837	0.0374163	-0.0263951	0.00623605	Not corrected	0.0215024	0	Non significant
SARS-CoV-2	1047	1059	MSFPQSAPHGVVF	10	Omicron - DELTA	1	-0.0288333	0.00993738	-0.106802	0.0351054	-0.204253	0.0702109	-0.0204253	0.00702109	Not corrected	0.0313619	0	Non significant
SARS-CoV-2	1087	1092	PREGVF	4	Omicron - DELTA	1	0.0034	0.0172833	0.0333103	0.0247317	0.0186016	0.0247317	0.00465039	0.00618292	Not corrected	0.337102	0	Non significant
SARS-CoV-2	1100	1106	FVTQRNF	6	Omicron - DELTA	1	0.00163567	0.0149996	0.0126637	0.085487	0.0126823	0.085487	0.00211372	0.0142478	Not corrected	0.837272	0	Non significant
SARS-CoV-2	1100	1114	FVTQRNFYEPQIITT	13	Omicron - DELTA	1	-0.0218477	0.00910366	-0.0500973	0.0683586	-0.168177	0.136717	-0.0129367	0.0105167	Not corrected	0.145786	0	Non significant
SARS-CoV-2	1243	1247	VLLST	4	Omicron - DELTA	1	-0.0217827	0.00262873	0.124769	0.0448161	0.107296	0.0448161	0.0268241	0.011204	Not corrected	0.0461672	0	Non significant
SARS-CoV-2	1243	1248	VLLSTF	5	Omicron - DELTA	1	-0.0379767	0.00531846	0.166066	0.038716	0.165344	0.038716	0.0330688	0.00774321	Not corrected	0.0125453	0	Non significant
SARS-CoV-2	291	303	CALDPLSETKCTL	11	Omicron - DELTA	1	-0.0334193	0.0068927	-0.281582	0.0305138	-0.573626	0.0610277	-0.0521478	0.00554797	Not corrected	0.000260806	0	Protected
SARS-CoV-2	1106	1114	FYEPQIITT	7	Omicron - DELTA	1	-0.030535	0.0071326	-0.308469	0.0277534	-0.305621	0.0277534	-0.0436602	0.00396477	Not corrected	0.000155799	0	Protected
SARS-CoV-2	177	191	MDLEGKQGNFKNLRE	14	Omicron - DELTA	1	0.00141383	0.0167328	0.231922	0.0157916	0.666779	0.0473748	0.047627	0.00338391	Not corrected	0.00175392	0	Deprotected
SARS-CoV-2	243	264	ALHRSYLTPGDSSSGWTAGAAA	20	Omicron - DELTA	1	-0.00831233	0.0133706	0.268751	0.0371054	0.826816	0.111316	0.0413408	0.00556581	Not corrected	0.000389123	0	Deprotected
SARS-CoV-2	245	265	HRSYLTPGDSSSGWTAGAAAY	19	Omicron - DELTA	1	-0.00196567	0.0162045	0.182088	0.0533869	0.694708	0.160161	0.0365636	0.00842951	Not corrected	0.00785689	0	Deprotected
SARS-CoV-2	627	633	DQLTPTW	5	Omicron - DELTA	1	-0.00882667	0.0159794	0.408911	0.0898494	0.393317	0.0898494	0.0786634	0.0179699	Not corrected	0.00824369	0	Deprotected
SARS-CoV-2	750	756	LLQYGSF	6	Omicron - DELTA	1	-0.0150227	0.0151303	0.565712	0.0327607	0.58176	0.0327607	0.09696	0.00546012	Not corrected	0.000932566	0	Deprotected
SARS-CoV-2	751	756	LQYGSF	5	Omicron - DELTA	1	-0.000987	0.0196294	0.486305	0.00934593	0.486576	0.00934593	0.0973152	0.00186919	Not corrected	2.08335e-07	0	Deprotected
SARS-CoV-2	968	974	GAISSVL	6	Omicron - DELTA	1	-0.0320023	0.00330889	0.682207	0.0700859	0.75546	0.0700859	0.12591	0.011681	Not corrected	0.00276772	0	Deprotected
SARS-CoV-2	979	987	SRLDPPEAE	6	Omicron - DELTA	1	-0.00299467	0.0129716	0.419624	0.0344456	0.80123	0.0688912	0.133538	0.0114819	Not corrected	7.91321e-05	0	Deprotected
SARS-CoV-2	979	989	SRLDPPEAEVQ	8	Omicron - DELTA	1	-0.016429	0.00296237	0.650685	0.0286888	1.29016	0.0573776	0.161269	0.0071722	Not corrected	9.65545e-06	0	Deprotected
SARS-CoV-2	988	993	VQIDRL	5	Omicron - DELTA	1	-0.0104913	0.00945503	0.293957	0.0502219	0.283665	0.0502219	0.0567331	0.0100444	Not corrected	0.00263694	0	Deprotected
SARS-CoV-2	32	42	FTRGVYYPDKV	9	Omicron - DELTA	2	-0.00643475	0.00941943	-0.0230965	0.0320424	-0.0397509	0.0640848	-0.00441677	0.00712053	Not corrected	0.341915	0	Non significant
SARS-CoV-2	32	43	FTRGVYYPDKVF	10	Omicron - DELTA	2	-0.020209	0.0100107	-0.0256402	0.0409955	-0.0905908	0.122987	-0.00905908	0.0122987	Not corrected	0.267495	0	Non significant
SARS-CoV-2	32	48	FTRGVYYPDKVFRSSVL	15	Omicron - DELTA	2	-0.023008	0.00897009	0.0358927	0.0537021	0.13399	0.214808	0.00893266	0.0143205	Not corrected	0.331737	0	Non significant
SARS-CoV-2	49	54	HSTQDL	5	Omicron - DELTA	2	0.0039225	0.0202294	0.090046	0.0452195	0.0982543	0.0452195	0.0196509	0.00904389	Not corrected	0.104383	0	Non significant
SARS-CoV-2	49	55	HSTQDLF	6	Omicron - DELTA	2	-0.0111872	0.0101215	0.0713925	0.0185769	0.105399	0.0185769	0.0175665	0.00309615	Not corrected	0.058454	0	Non significant
SARS-CoV-2	49	56	HSTQDLFL	7	Omicron - DELTA	2	-0.0266905	0.00966239	0.0864395	0.0324341	0.102457	0.0324341	0.0146367	0.00463344	Not corrected	0.0350478	0	Non significant
SARS-CoV-2	85	91	PFNDGVY	5	Omicron - DELTA	2	0.00281717	0.0123436	-0.0949207	0.0909915	-0.0691481	0.0909915	-0.0138296	0.0181983	Not corrected	0.359587	0	Non significant
SARS-CoV-2	104	110	WIFGTTL	6	Omicron - DELTA	2	-0.036472	0.0145698	-0.00976375	0.0798903	-0.00567513	0.0798903	-0.000945854	0.013315	Not corrected	0.925252	0	Non significant
SARS-CoV-2	111	117	DSKTQSL	6	Omicron - DELTA	2	-0.00149375	0.026415	0.0524185	0.0187388	0.00291029	0.0187388	0.000485049	0.00312313	Not corrected	0.792633	0	Non significant
SARS-CoV-2	177	186	MDLEGKQGNF	9	Omicron - DELTA	2	-0.00467725	0.0110354	0.573551	0.0901795	1.11088	0.180359	0.123431	0.0200399	Not corrected	0.045621	0	Non significant
SARS-CoV-2	192	199	FVFKNIDG	7	Omicron - DELTA	2	-0.0194902	0.00539251	0.141693	0.0347324	0.196512	0.0694649	0.0280731	0.00992355	Not corrected	0.0276011	0	Non significant
SARS-CoV-2	192	200	FVFKNIDGY	8	Omicron - DELTA	2	-0.0224177	0.0128975	0.0843588	0.017983	0.133343	0.035966	0.0166679	0.00449575	Not corrected	0.00541577	0	Non significant
SARS-CoV-2	192	201	FVFKNIDGYF	9	Omicron - DELTA	2	-0.026035	0.0118165	0.0503615	0.0198357	0.143238	0.0396714	0.0159153	0.00440793	Not corrected	0.005258	0	Non significant
SARS-CoV-2	195	201	KNIDGYF	6	Omicron - DELTA	2	-0.0108	0.0172014	0.090868	0.0716685	0.207475	0.0716685	0.0345792	0.0119448	Not corrected	0.166661	0	Non significant
SARS-CoV-2	265	276	YYVGYLQPRTFL	10	Omicron - DELTA	2	-0.0347393	0.0120932	-0.0010165	0.0156543	0.020635	0.0313085	0.0020635	0.00313085	Not corrected	0.387278	0	Non significant
SARS-CoV-2	266	276	YVGYLQPRTFL	9	Omicron - DELTA	2	-0.032282	0.0119798	0.0524105	0.0158956	0.11133	0.0317912	0.01237	0.00353235	Not corrected	0.00429685	0	Non significant
SARS-CoV-2	267	276	VGYLQPRTFL	8	Omicron - DELTA	2	-0.0306778	0.0121502	0.0758345	0.0429098	0.0360235	0.0858196	0.00450294	0.0107275	Not corrected	0.661788	0	Non significant
SARS-CoV-2	269	276	YLQPRTFL	6	Omicron - DELTA	2	-0.0234805	0.00987984	0.156938	0.0332118	0.248236	0.0664236	0.0413727	0.0110706	Not corrected	0.090371	0	Non significant
SARS-CoV-2	291	303	CALDPLSETKCTL	11	Omicron - DELTA	2	-0.029058	0.0135927	-0.193674	0.0629232	-0.39781	0.125846	-0.0361646	0.0114406	Not corrected	0.0109663	0	Non significant
SARS-CoV-2	306	313	FTVEKGIY	7	Omicron - DELTA	2	-0.0129497	0.0102349	0.10582	0.0308495	0.158279	0.061699	0.0226113	0.00881414	Not corrected	0.11347	0	Non significant
SARS-CoV-2	388	392	NDLCF	4	Omicron - DELTA	2	-0.0111585	0.0097366	0.191782	0.0815335	0.194655	0.0815335	0.0486636	0.0203834	Not corrected	0.0494624	0	Non significant
SARS-CoV-2	396	400	YADSF	4	Omicron - DELTA	2	0.00758725	0.0145427	0.020055	0.0460082	0.0415387	0.0460082	0.0103847	0.011502	Not corrected	0.191527	0	Non significant
SARS-CoV-2	423	429	YKLPDDF	5	Omicron - DELTA	2	-0.013835	0.0110904	0.0279928	0.0172558	0.0214883	0.0345116	0.00429766	0.00690232	Not corrected	0.343724	0	Non significant
SARS-CoV-2	497	505	FQPTNGVGY	7	Omicron - DELTA	2	-0.0249203	0.0118607	0.0251037	0.0911791	0.0237961	0.0911791	0.00339944	0.0130256	Not corrected	0.662121	0	Non significant
SARS-CoV-2	511	515	VVLSF	4	Omicron - DELTA	2	-0.028766	0.0118892	0.0551868	0.0256446	0.0294787	0.0256446	0.00736967	0.00641116	Not corrected	0.117189	0	Non significant
SARS-CoV-2	553	568	TESNKKFLPFQQFGRD	14	Omicron - DELTA	2	-0.0192632	0.0108873	0.110057	0.0780496	0.315477	0.234149	0.0225341	0.0167249	Not corrected	0.0880865	0	Non significant
SARS-CoV-2	569	574	IADTTD	5	Omicron - DELTA	2	0.0138448	0.00590345	0.110416	0.0658408	0.077176	0.0658408	0.0154352	0.0131682	Not corrected	0.121944	0	Non significant
SARS-CoV-2	575	582	AVRDPQTL	6	Omicron - DELTA	2	-0.007272	0.00453147	0.078798	0.0348761	0.188619	0.0697523	0.0314365	0.0116254	Not corrected	0.0352267	0	Non significant
SARS-CoV-2	575	583	AVRDPQTLE	7	Omicron - DELTA	2	-0.00357225	0.0109811	0.0746252	0.027798	0.168265	0.055596	0.0240378	0.00794229	Not corrected	0.0869586	0	Non significant
SARS-CoV-2	576	582	VRDPQTL	5	Omicron - DELTA	2	-0.0054255	0.0114344	0.171244	0.026053	0.142502	0.026053	0.0285005	0.0052106	Not corrected	0.00149941	0	Non significant
SARS-CoV-2	586	592	DITPCSF	5	Omicron - DELTA	2	-0.0194552	0.0106449	0.279281	0.134874	0.219896	0.134874	0.0439791	0.0269748	Not corrected	0.0490425	0	Non significant
SARS-CoV-2	605	621	SNQVAVLYQGVNCTEVP	15	Omicron - DELTA	2	-0.0266852	0.0110325	-0.0156723	0.0399195	-0.06412	0.119759	-0.00427467	0.0079839	Not corrected	0.510054	0	Non significant
SARS-CoV-2	627	633	DQLTPTW	5	Omicron - DELTA	2	-0.0141243	0.0113182	0.677573	0.0934649	0.661979	0.0934649	0.132396	0.018693	Not corrected	0.0613272	0	Non significant
SARS-CoV-2	664	682	IPIGAGICASYQTQTNSPA	16	Omicron - DELTA	2	-0.0263763	0.0106746	-0.031956	0.0281065	-0.0862152	0.0843196	-0.00538845	0.00526997	Not corrected	0.225857	0	Non significant
SARS-CoV-2	688	692	SIIAY	4	Omicron - DELTA	2	-0.0181885	0.00818704	-0.0513183	0.0623534	-0.0629924	0.0623534	-0.0157481	0.0155884	Not corrected	0.153842	0	Non significant
SARS-CoV-2	692	696	YTMSL	4	Omicron - DELTA	2	-0.0192163	0.00858427	0.0324795	0.0864738	0.0288923	0.0864738	0.00722308	0.0216185	Not corrected	0.580611	0	Non significant
SARS-CoV-2	716	720	TISVT	4	Omicron - DELTA	2	-0.010792	0.00422229	0.105146	0.00783203	0.0943956	0.00783203	0.0235989	0.00195801	Not corrected	9.10613e-05	0	Non significant
SARS-CoV-2	719	724	VTTEIL	5	Omicron - DELTA	2	-0.0238	0.00957208	0.0993215	0.019005	0.0679641	0.019005	0.0135928	0.003801	Not corrected	0.00511696	0	Non significant
SARS-CoV-2	721	727	TEILPVS	5	Omicron - DELTA	2	-0.0289575	0.0136169	0.0111797	0.0864515	0.0192556	0.0864515	0.00385111	0.0172903	Not corrected	0.84533	0	Non significant
SARS-CoV-2	721	728	TEILPVSM	6	Omicron - DELTA	2	-0.0374373	0.0163076	0.0634165	0.0235144	0.0512748	0.0235144	0.0085458	0.00391907	Not corrected	0.0202461	0	Non significant
SARS-CoV-2	769	779	VEQDKNTQEVF	10	Omicron - DELTA	2	-0.00737575	0.0104007	-0.0638315	0.0260012	-0.154441	0.0520023	-0.0154441	0.00520023	Not corrected	0.0082221	0	Non significant
SARS-CoV-2	818	825	LLFNKVTL	7	Omicron - DELTA	2	-0.0359418	0.0132824	0.123687	0.054364	0.317501	0.108728	0.0453573	0.0155326	Not corrected	0.0749834	0	Non significant
SARS-CoV-2	820	830	FNKVTLADAGF	10	Omicron - DELTA	2	-0.025856	0.0108063	0.339625	0.0193664	0.655995	0.0387329	0.0655995	0.00387329	Not corrected	0.0168426	0	Non significant
SARS-CoV-2	867	874	IAQYTSAL	7	Omicron - DELTA	2	-0.013263	0.00854476	-0.0928742	0.0691924	-0.0907406	0.0691924	-0.0129629	0.00988462	Not corrected	0.0923492	0	Non significant
SARS-CoV-2	870	874	YTSAL	4	Omicron - DELTA	2	-0.00325	0.00918664	-0.092225	0.0473919	-0.095287	0.0473919	-0.0238218	0.011848	Not corrected	0.0306065	0	Non significant
SARS-CoV-2	875	882	LAGTITSG	7	Omicron - DELTA	2	-0.007716	0.00529405	-0.90693	0.329904	-0.90641	0.329904	-0.129487	0.0471292	Not corrected	0.0143093	0	Non significant
SARS-CoV-2	899	903	MAYRF	4	Omicron - DELTA	2	-0.00799025	0.0128271	-0.0922473	0.0161899	-0.0804648	0.0161899	-0.0201162	0.00404748	Not corrected	0.00245934	0	Non significant
SARS-CoV-2	899	913	MAYRFNGIGVTQNVL	14	Omicron - DELTA	2	-0.0286235	0.0124702	-0.0613278	0.0548997	-0.0507212	0.109799	-0.00362294	0.00784282	Not corrected	0.460872	0	Non significant
SARS-CoV-2	900	910	AYRFNGIGVTQ	10	Omicron - DELTA	2	-0.0145322	0.0102915	0.0228992	0.0767702	0.0259602	0.15354	0.00259602	0.015354	Not corrected	0.774765	0	Non significant
SARS-CoV-2	900	913	AYRFNGIGVTQNVL	13	Omicron - DELTA	2	-0.0285	0.0116341	0.0175685	0.085349	0.0146266	0.170698	0.00112512	0.0131306	Not corrected	0.884374	0	Non significant
SARS-CoV-2	901	913	YRFNGIGVTQNVL	12	Omicron - DELTA	2	-0.0254337	0.0111075	-0.0229295	0.101439	-0.0544364	0.202878	-0.00453637	0.0169065	Not corrected	0.654449	0	Non significant
SARS-CoV-2	904	913	NGIGVTQNVL	9	Omicron - DELTA	2	-0.0271465	0.0109255	0.0033785	0.128347	0.00113498	0.128347	0.000126109	0.0142608	Not corrected	0.988018	0	Non significant
SARS-CoV-2	906	913	IGVTQNVL	7	Omicron - DELTA	2	-0.0255185	0.0108723	-0.109017	0.121073	-0.12436	0.121073	-0.0177657	0.0172962	Not corrected	0.153256	0	Non significant
SARS-CoV-2	914	919	YENQKL	5	Omicron - DELTA	2	-0.00995925	0.0324846	0.119803	0.0473886	0.240595	0.0947772	0.0481189	0.0189554	Not corrected	0.0165658	0	Non significant
SARS-CoV-2	920	924	IANQF	4	Omicron - DELTA	2	-0.00273225	0.0117971	0.0249842	0.0116723	0.0197697	0.0116723	0.00494242	0.00291808	Not corrected	0.200772	0	Non significant
SARS-CoV-2	920	935	IANQFNSAIGKIQDSL	15	Omicron - DELTA	2	-0.0311627	0.0132444	0.222901	0.0984373	0.465966	0.196875	0.0310644	0.013125	Not corrected	0.021704	0	Non significant
SARS-CoV-2	928	935	IGKIQDSL	7	Omicron - DELTA	2	-0.0139073	0.00856285	0.240537	0.0642993	0.477787	0.128599	0.0682553	0.0183712	Not corrected	0.0667212	0	Non significant
SARS-CoV-2	988	993	VQIDRL	5	Omicron - DELTA	2	-0.0145535	0.00719601	0.348103	0.179248	0.337812	0.179248	0.0675624	0.0358496	Not corrected	0.0394336	0	Non significant
SARS-CoV-2	990	998	IDRLITGRL	8	Omicron - DELTA	2	-0.0205795	0.00809021	-0.099594	0.0664174	-0.222297	0.132835	-0.0277871	0.0166044	Not corrected	0.0520048	0	Non significant
SARS-CoV-2	994	998	ITGRL	4	Omicron - DELTA	2	-0.0109918	0.0105778	-0.0914413	0.101041	-0.0841692	0.101041	-0.0210423	0.0252603	Not corrected	0.218387	0	Non significant
SARS-CoV-2	999	1003	QSLQT	4	Omicron - DELTA	2	-0.0102968	0.0383631	-0.047053	0.0159583	-0.057931	0.0159583	-0.0144828	0.00398957	Not corrected	0.0128151	0	Non significant
SARS-CoV-2	1004	1009	YVTQQL	5	Omicron - DELTA	2	-0.00780575	0.00839869	-0.0551905	0.00802769	-0.0586429	0.00802769	-0.0117286	0.00160554	Not corrected	0.0113041	0	Non significant
SARS-CoV-2	1013	1017	AEIRA	4	Omicron - DELTA	2	-0.0195192	0.0112579	-0.0703162	0.01416	-0.0547904	0.01416	-0.0136976	0.00354	Not corrected	0.0178302	0	Non significant
SARS-CoV-2	1015	1021	IRASANL	6	Omicron - DELTA	2	-0.00819425	0.00673179	-0.17887	0.0147593	-0.204616	0.0147593	-0.0341027	0.00245988	Not corrected	3.10169e-05	0	Non significant
SARS-CoV-2	1047	1059	MSFPQSAPHGVVF	10	Omicron - DELTA	2	-0.029075	0.0133751	-0.0732073	0.0214187	-0.137063	0.0428373	-0.0137063	0.00428373	Not corrected	0.048684	0	Non significant
SARS-CoV-2	1087	1092	PREGVF	4	Omicron - DELTA	2	-0.00715225	0.0122495	0.108275	0.0191752	0.0935662	0.0191752	0.0233916	0.00479381	Not corrected	0.024907	0	Non significant
SARS-CoV-2	1100	1106	FVTQRNF	6	Omicron - DELTA	2	-0.00681575	0.0112141	0.0747765	0.146565	0.0747952	0.146565	0.0124659	0.0244275	Not corrected	0.414727	0	Non significant
SARS-CoV-2	1100	1114	FVTQRNFYEPQIITT	13	Omicron - DELTA	2	-0.02291	0.0107805	-0.0568103	0.0801365	-0.181603	0.160273	-0.0139694	0.0123287	Not corrected	0.130701	0	Non significant
SARS-CoV-2	1106	1114	FYEPQIITT	7	Omicron - DELTA	2	-0.0267912	0.0122122	-0.224734	0.0794241	-0.221887	0.0794241	-0.0316982	0.0113463	Not corrected	0.0140184	0	Non significant
SARS-CoV-2	767	779	IAVEQDKNTQEVF	12	Omicron - DELTA	2	-0.013767	0.0112207	-0.12304	0.0176339	-0.222223	0.0352678	-0.0185185	0.00293898	Not corrected	0.00411723	0	Protected
SARS-CoV-2	177	191	MDLEGKQGNFKNLRE	14	Omicron - DELTA	2	-0.00143425	0.011171	0.359646	0.0219764	1.04995	0.0659291	0.0749965	0.00470922	Not corrected	0.00140557	0	Deprotected
SARS-CoV-2	180	191	EGKQGNFKNLRE	11	Omicron - DELTA	2	0.00154375	0.0336184	0.411989	0.0277441	0.800914	0.0554882	0.0728104	0.00504438	Not corrected	0.000108711	0	Deprotected
SARS-CoV-2	243	264	ALHRSYLTPGDSSSGWTAGAAA	20	Omicron - DELTA	2	-0.0129527	0.0102006	0.659614	0.0433938	1.9994	0.130181	0.0999702	0.00650907	Not corrected	0.00222405	0	Deprotected
SARS-CoV-2	245	264	HRSYLTPGDSSSGWTAGAAA	18	Omicron - DELTA	2	-0.0106097	0.0101927	0.799901	0.0615974	1.58548	0.123195	0.0880822	0.00684416	Not corrected	0.0001204	0	Deprotected
SARS-CoV-2	245	265	HRSYLTPGDSSSGWTAGAAAY	19	Omicron - DELTA	2	-0.009134	0.0112701	0.532649	0.0528156	1.74639	0.158447	0.0919154	0.0083393	Not corrected	0.00249407	0	Deprotected
SARS-CoV-2	306	317	FTVEKGIYQTSN	11	Omicron - DELTA	2	-0.008354	0.010255	0.439074	0.0453968	0.874842	0.0907937	0.0795311	0.00825397	Not corrected	0.00868579	0	Deprotected
SARS-CoV-2	306	318	FTVEKGIYQTSNF	12	Omicron - DELTA	2	-0.0185887	0.0108074	0.414628	0.0267865	0.818703	0.0535729	0.0682252	0.00446441	Not corrected	0.000401397	0	Deprotected
SARS-CoV-2	314	318	QTSNF	4	Omicron - DELTA	2	0.0107475	0.0182182	0.333832	0.0852451	0.318798	0.0852451	0.0796995	0.0213113	Not corrected	0.00330128	0	Deprotected
SARS-CoV-2	318	325	FRVQPTES	6	Omicron - DELTA	2	-0.009222	0.00693161	0.527927	0.0356291	0.541222	0.0356291	0.0902036	0.00593819	Not corrected	1.3819e-05	0	Deprotected
SARS-CoV-2	456	467	FRKSNLKPFERD	10	Omicron - DELTA	2	-0.0043615	0.0105881	0.256186	0.0316671	0.511034	0.0633342	0.0511034	0.00633342	Not corrected	0.000230262	0	Deprotected
SARS-CoV-2	456	471	FRKSNLKPFERDISTE	14	Omicron - DELTA	2	-0.002644	0.0106592	0.220406	0.0184632	0.685979	0.0553896	0.0489985	0.0039564	Not corrected	3.34064e-05	0	Deprotected
SARS-CoV-2	516	533	ELLHAPATVCGPKKSTNL	15	Omicron - DELTA	2	-0.0204522	0.00815032	0.226668	0.0699058	0.657641	0.209717	0.0438427	0.0139812	Not corrected	0.00675968	0	Deprotected
SARS-CoV-2	634	643	RVYSTGSNVF	9	Omicron - DELTA	2	-0.00855625	0.0142958	0.620898	0.0800791	0.655838	0.0800791	0.0728709	0.00889767	Not corrected	0.000358584	0	Deprotected
SARS-CoV-2	750	756	LLQYGSF	6	Omicron - DELTA	2	-0.0196945	0.0111738	0.639705	0.113914	0.655753	0.113914	0.109292	0.0189857	Not corrected	0.0013539	0	Deprotected
SARS-CoV-2	751	756	LQYGSF	5	Omicron - DELTA	2	-0.0107922	0.0122573	0.637741	0.115775	0.638011	0.115775	0.127602	0.023155	Not corrected	0.0016692	0	Deprotected
SARS-CoV-2	819	825	LFNKVTL	6	Omicron - DELTA	2	-0.0289178	0.00989644	0.198153	0.0131023	0.43215	0.0262047	0.072025	0.00436745	Not corrected	2.74453e-05	0	Deprotected
SARS-CoV-2	820	829	FNKVTLADAG	9	Omicron - DELTA	2	-0.0134833	0.00809706	0.415819	0.0210397	0.776256	0.0420793	0.0862506	0.00467548	Not corrected	0.000440297	0	Deprotected
SARS-CoV-2	826	830	ADAGF	4	Omicron - DELTA	2	0.00519825	0.0154755	0.261478	0.0428201	0.263996	0.0428201	0.0659989	0.010705	Not corrected	0.00135438	0	Deprotected
SARS-CoV-2	925	935	NSAIGKIQDSL	10	Omicron - DELTA	2	-0.0191153	0.0101792	0.236781	0.0606593	0.46547	0.121319	0.046547	0.0121319	Not corrected	0.00564874	0	Deprotected
SARS-CoV-2	968	974	GAISSVL	6	Omicron - DELTA	2	-0.0286985	0.0100772	0.881601	0.166167	0.954854	0.166167	0.159142	0.0276945	Not corrected	0.000881753	0	Deprotected
SARS-CoV-2	979	987	SRLDPPEAE	6	Omicron - DELTA	2	-0.00676525	0.0123601	0.408577	0.085071	0.779136	0.170142	0.129856	0.028357	Not corrected	0.0025564	0	Deprotected
SARS-CoV-2	979	989	SRLDPPEAEVQ	8	Omicron - DELTA	2	-0.0136247	0.00578063	0.624716	0.114377	1.23822	0.228754	0.154777	0.0285943	Not corrected	0.00210573	0	Deprotected
SARS-CoV-2	1243	1247	VLLST	4	Omicron - DELTA	2	-0.0172952	0.00734534	0.242984	0.0353131	0.225511	0.0353131	0.0563778	0.00882828	Not corrected	0.000529804	0	Deprotected
SARS-CoV-2	1243	1248	VLLSTF	5	Omicron - DELTA	2	-0.0330967	0.0127843	0.336947	0.0424874	0.336225	0.0424874	0.067245	0.00849749	Not corrected	0.000611546	0	Deprotected
SARS-CoV-2	32	42	FTRGVYYPDKV	9	Omicron - DELTA	10	-0.0101598	0.00486981	-0.0969637	0.0100627	-0.187485	0.0201253	-0.0208317	0.00223615	Not corrected	0.00795257	0	Non significant
SARS-CoV-2	32	43	FTRGVYYPDKVF	10	Omicron - DELTA	10	-0.0212757	0.00797901	-0.0250715	0.0182941	-0.0888846	0.0548822	-0.00888846	0.00548822	Not corrected	0.116285	0	Non significant
SARS-CoV-2	32	48	FTRGVYYPDKVFRSSVL	15	Omicron - DELTA	10	-0.0220383	0.00822119	0.004154	0.0107566	0.00703494	0.0430263	0.000468996	0.00286842	Not corrected	0.834685	0	Non significant
SARS-CoV-2	49	54	HSTQDL	5	Omicron - DELTA	10	0.00521683	0.0319619	0.10321	0.075228	0.111418	0.075228	0.0222837	0.0150456	Not corrected	0.147377	0	Non significant
SARS-CoV-2	49	55	HSTQDLF	6	Omicron - DELTA	10	-0.0143517	0.00613333	0.0664332	0.05877	0.10044	0.05877	0.01674	0.00979501	Not corrected	0.0980777	0	Non significant
SARS-CoV-2	49	56	HSTQDLFL	7	Omicron - DELTA	10	-0.0260947	0.00849601	0.0762763	0.0639965	0.092294	0.0639965	0.0131849	0.00914235	Not corrected	0.137475	0	Non significant
SARS-CoV-2	85	91	PFNDGVY	5	Omicron - DELTA	10	-0.00921583	0.00648095	-0.087159	0.0633778	-0.0613864	0.0633778	-0.0122773	0.0126756	Not corrected	0.257343	0	Non significant
SARS-CoV-2	104	110	WIFGTTL	6	Omicron - DELTA	10	-0.0374735	0.0122741	-0.019802	0.0836326	-0.0157134	0.0836326	-0.0026189	0.0139388	Not corrected	0.798407	0	Non significant
SARS-CoV-2	111	117	DSKTQSL	6	Omicron - DELTA	10	-0.000710167	0.0488706	-0.00856817	0.0256872	-0.0580764	0.0256872	-0.0096794	0.0042812	Not corrected	0.0505269	0	Non significant
SARS-CoV-2	177	191	MDLEGKQGNFKNLRE	14	Omicron - DELTA	10	-0.00755183	0.00434602	0.293067	0.090371	0.850212	0.271113	0.0607294	0.0193652	Not corrected	0.0397015	0	Non significant
SARS-CoV-2	192	199	FVFKNIDG	7	Omicron - DELTA	10	-0.0151968	0.00752042	0.154549	0.021181	0.222224	0.0423619	0.0317462	0.0060517	Not corrected	0.0778501	0	Non significant
SARS-CoV-2	192	200	FVFKNIDGY	8	Omicron - DELTA	10	-0.0283002	0.0109506	0.0993545	0.0549812	0.163335	0.109962	0.0204168	0.0137453	Not corrected	0.146692	0	Non significant
SARS-CoV-2	192	201	FVFKNIDGYF	9	Omicron - DELTA	10	-0.027495	0.0125193	0.039168	0.0404694	0.120851	0.0809388	0.0134278	0.0089932	Not corrected	0.16097	0	Non significant
SARS-CoV-2	195	201	KNIDGYF	6	Omicron - DELTA	10	-0.0137562	0.00785561	0.0817172	0.0477369	0.198324	0.0477369	0.033054	0.00795615	Not corrected	0.0131235	0	Non significant
SARS-CoV-2	243	264	ALHRSYLTPGDSSSGWTAGAAA	20	Omicron - DELTA	10	-0.0169007	0.00698473	0.645983	0.151957	1.95851	0.45587	0.0979256	0.0227935	Not corrected	0.0210007	0	Non significant
SARS-CoV-2	245	264	HRSYLTPGDSSSGWTAGAAA	18	Omicron - DELTA	10	-0.0142742	0.00576318	0.798943	0.214756	1.58356	0.429512	0.0879758	0.0238618	Not corrected	0.0282168	0	Non significant
SARS-CoV-2	245	265	HRSYLTPGDSSSGWTAGAAAY	19	Omicron - DELTA	10	-0.0121807	0.00785403	0.616228	0.153223	1.99713	0.459668	0.105112	0.024193	Not corrected	0.0199268	0	Non significant
SARS-CoV-2	265	276	YYVGYLQPRTFL	10	Omicron - DELTA	10	-0.0320552	0.0112611	-0.017334	0.0245566	-0.012	0.0491131	-0.0012	0.00491131	Not corrected	0.752715	0	Non significant
SARS-CoV-2	266	276	YVGYLQPRTFL	9	Omicron - DELTA	10	-0.0327683	0.0117923	-0.004384	0.0132347	-0.00225887	0.0264694	-0.000250985	0.00294104	Not corrected	0.908482	0	Non significant
SARS-CoV-2	267	276	VGYLQPRTFL	8	Omicron - DELTA	10	-0.0308925	0.010956	0.0265827	0.0693514	-0.0624801	0.138703	-0.00781001	0.0173379	Not corrected	0.557944	0	Non significant
SARS-CoV-2	269	276	YLQPRTFL	6	Omicron - DELTA	10	-0.023248	0.00815714	0.125682	0.0412181	0.185724	0.0824363	0.0309541	0.0137394	Not corrected	0.0526388	0	Non significant
SARS-CoV-2	306	313	FTVEKGIY	7	Omicron - DELTA	10	-0.0159518	0.00661137	0.0725975	0.0558219	0.0918344	0.111644	0.0131192	0.0159491	Not corrected	0.320256	0	Non significant
SARS-CoV-2	306	317	FTVEKGIYQTSN	11	Omicron - DELTA	10	-0.0113467	0.00575415	0.316379	0.100758	0.629453	0.201515	0.057223	0.0183196	Not corrected	0.0232993	0	Non significant
SARS-CoV-2	306	318	FTVEKGIYQTSNF	12	Omicron - DELTA	10	-0.0207088	0.0093423	0.33797	0.113876	0.665387	0.227753	0.0554489	0.0189794	Not corrected	0.0449309	0	Non significant
SARS-CoV-2	314	318	QTSNF	4	Omicron - DELTA	10	-0.000686	0.00542243	0.260145	0.0733142	0.245111	0.0733142	0.0612778	0.0183285	Not corrected	0.0332124	0	Non significant
SARS-CoV-2	318	325	FRVQPTES	6	Omicron - DELTA	10	-0.0123327	0.01051	0.456375	0.129603	0.46967	0.129603	0.0782784	0.0216005	Not corrected	0.0141857	0	Non significant
SARS-CoV-2	388	392	NDLCF	4	Omicron - DELTA	10	-0.0198465	0.00992196	0.205413	0.0498287	0.208285	0.0498287	0.0520712	0.0124572	Not corrected	0.0771323	0	Non significant
SARS-CoV-2	396	400	YADSF	4	Omicron - DELTA	10	-0.0016935	0.00374634	0.0754585	0.0537122	0.0969422	0.0537122	0.0242355	0.0134281	Not corrected	0.103485	0	Non significant
SARS-CoV-2	423	429	YKLPDDF	5	Omicron - DELTA	10	-0.0176313	0.00851123	0.0367543	0.0290115	0.0390115	0.058023	0.0078023	0.0116046	Not corrected	0.403299	0	Non significant
SARS-CoV-2	456	467	FRKSNLKPFERD	10	Omicron - DELTA	10	-0.00953433	0.00445424	0.253861	0.0528319	0.506383	0.105664	0.0506383	0.0105664	Not corrected	0.0172898	0	Non significant
SARS-CoV-2	456	471	FRKSNLKPFERDISTE	14	Omicron - DELTA	10	-0.008202	0.00262306	0.229557	0.0671845	0.713431	0.201553	0.0509594	0.0143967	Not corrected	0.0314713	0	Non significant
SARS-CoV-2	497	505	FQPTNGVGY	7	Omicron - DELTA	10	-0.0271537	0.0083945	-0.008383	0.0866959	-0.00969067	0.0866959	-0.00138438	0.0123851	Not corrected	0.878762	0	Non significant
SARS-CoV-2	511	515	VVLSF	4	Omicron - DELTA	10	-0.028443	0.0116399	0.0540783	0.0251255	0.0283703	0.0251255	0.00709257	0.00628136	Not corrected	0.274027	0	Non significant
SARS-CoV-2	516	533	ELLHAPATVCGPKKSTNL	15	Omicron - DELTA	10	-0.018843	0.00243349	0.0195	0.129552	0.0361364	0.388656	0.00240909	0.0259104	Not corrected	0.92758	0	Non significant
SARS-CoV-2	569	574	IADTTD	5	Omicron - DELTA	10	0.011927	0.00448058	0.139091	0.0693719	0.105851	0.0693719	0.0211702	0.0138744	Not corrected	0.118057	0	Non significant
SARS-CoV-2	575	582	AVRDPQTL	6	Omicron - DELTA	10	-0.00649617	0.00857209	-0.0014145	0.0157214	0.0281941	0.0314428	0.00469901	0.00524047	Not corrected	0.443344	0	Non significant
SARS-CoV-2	575	583	AVRDPQTLE	7	Omicron - DELTA	10	-0.009152	0.00863976	0.0364647	0.0149751	0.0919435	0.0299502	0.0131348	0.0042786	Not corrected	0.0400571	0	Non significant
SARS-CoV-2	576	582	VRDPQTL	5	Omicron - DELTA	10	-0.0104398	0.011453	0.05902	0.0606857	0.0302781	0.0606857	0.00605561	0.0121371	Not corrected	0.518481	0	Non significant
SARS-CoV-2	586	592	DITPCSF	5	Omicron - DELTA	10	-0.0201802	0.0111239	0.276045	0.118393	0.216659	0.118393	0.0433318	0.0236787	Not corrected	0.103409	0	Non significant
SARS-CoV-2	605	621	SNQVAVLYQGVNCTEVP	15	Omicron - DELTA	10	-0.024104	0.00809106	-0.0807157	0.0697515	-0.25925	0.209255	-0.0172834	0.0139503	Not corrected	0.177536	0	Non significant
SARS-CoV-2	627	633	DQLTPTW	5	Omicron - DELTA	10	-0.018536	0.0103672	0.472839	0.194826	0.457245	0.194826	0.091449	0.0389651	Not corrected	0.0520139	0	Non significant
SARS-CoV-2	634	643	RVYSTGSNVF	9	Omicron - DELTA	10	-0.0152618	0.0050204	0.603044	0.220174	0.637984	0.220174	0.0708871	0.0244638	Not corrected	0.037856	0	Non significant
SARS-CoV-2	664	682	IPIGAGICASYQTQTNSPA	16	Omicron - DELTA	10	-0.024253	0.00932063	-0.0764572	0.00269468	-0.219719	0.00808403	-0.0137324	0.000505252	Not corrected	0.000158648	0	Non significant
SARS-CoV-2	688	692	SIIAY	4	Omicron - DELTA	10	-0.0174895	0.00621972	-0.183445	0.0651509	-0.19512	0.0651509	-0.0487799	0.0162877	Not corrected	0.0236834	0	Non significant
SARS-CoV-2	692	696	YTMSL	4	Omicron - DELTA	10	-0.0231883	0.0079664	0.151572	0.0409231	0.147985	0.0409231	0.0369963	0.0102308	Not corrected	0.0148635	0	Non significant
SARS-CoV-2	716	720	TISVT	4	Omicron - DELTA	10	-0.0138742	0.0101293	0.036064	0.019046	0.0253134	0.019046	0.00632834	0.00476149	Not corrected	0.218511	0	Non significant
SARS-CoV-2	719	724	VTTEIL	5	Omicron - DELTA	10	-0.022762	0.00797273	0.125481	0.0491805	0.0941238	0.0491805	0.0188248	0.00983611	Not corrected	0.0866	0	Non significant
SARS-CoV-2	721	727	TEILPVS	5	Omicron - DELTA	10	-0.026804	0.00749243	0.0272135	0.0230696	0.0352893	0.0230696	0.00705786	0.00461393	Not corrected	0.166167	0	Non significant
SARS-CoV-2	721	728	TEILPVSM	6	Omicron - DELTA	10	-0.0341217	0.0119335	0.057547	0.0274951	0.0454053	0.0274951	0.00756755	0.00458251	Not corrected	0.0994266	0	Non significant
SARS-CoV-2	769	779	VEQDKNTQEVF	10	Omicron - DELTA	10	-0.0140038	0.00400586	-0.0740962	0.0260774	-0.17497	0.0521549	-0.017497	0.00521549	Not corrected	0.131898	0	Non significant
SARS-CoV-2	818	825	LLFNKVTL	7	Omicron - DELTA	10	-0.0323707	0.0114866	0.165328	0.102476	0.400784	0.204952	0.0572548	0.0292789	Not corrected	0.0708668	0	Non significant
SARS-CoV-2	819	825	LFNKVTL	6	Omicron - DELTA	10	-0.0274845	0.00813243	0.198538	0.075457	0.43292	0.150914	0.0721534	0.0251523	Not corrected	0.0420518	0	Non significant
SARS-CoV-2	820	829	FNKVTLADAG	9	Omicron - DELTA	10	-0.015075	0.00346189	0.355943	0.155847	0.656504	0.311693	0.0729449	0.0346326	Not corrected	0.248261	0	Non significant
SARS-CoV-2	820	830	FNKVTLADAGF	10	Omicron - DELTA	10	-0.0280388	0.0103022	0.316497	0.143346	0.609738	0.286692	0.0609738	0.0286692	Not corrected	0.0802018	0	Non significant
SARS-CoV-2	826	830	ADAGF	4	Omicron - DELTA	10	-0.00466833	0.00326714	0.227053	0.0998007	0.229571	0.0998007	0.0573926	0.0249502	Not corrected	0.0594138	0	Non significant
SARS-CoV-2	867	874	IAQYTSAL	7	Omicron - DELTA	10	-0.016235	0.0074332	-0.212595	0.0208467	-0.210462	0.0208467	-0.0300659	0.00297811	Not corrected	0.000774009	0	Non significant
SARS-CoV-2	870	874	YTSAL	4	Omicron - DELTA	10	-0.0087945	0.00487355	-0.190637	0.0357236	-0.193699	0.0357236	-0.0484248	0.00893089	Not corrected	0.00758185	0	Non significant
SARS-CoV-2	875	882	LAGTITSG	7	Omicron - DELTA	10	-0.0104598	0.0125815	-0.793487	0.17068	-0.792967	0.17068	-0.113281	0.0243829	Not corrected	0.0185612	0	Non significant
SARS-CoV-2	899	903	MAYRF	4	Omicron - DELTA	10	-0.0142948	0.00528917	-0.161057	0.0470031	-0.149275	0.0470031	-0.0373188	0.0117508	Not corrected	0.0371904	0	Non significant
SARS-CoV-2	899	913	MAYRFNGIGVTQNVL	14	Omicron - DELTA	10	-0.0300398	0.0120794	-0.15575	0.0277272	-0.239566	0.0554543	-0.0171118	0.00396102	Not corrected	0.0115213	0	Non significant
SARS-CoV-2	900	910	AYRFNGIGVTQ	10	Omicron - DELTA	10	-0.0166978	0.00782417	-0.0694448	0.110949	-0.158728	0.221898	-0.0158728	0.0221898	Not corrected	0.376986	0	Non significant
SARS-CoV-2	900	913	AYRFNGIGVTQNVL	13	Omicron - DELTA	10	-0.0276448	0.0114275	-0.0830382	0.0226112	-0.186587	0.0452224	-0.0143528	0.00347865	Not corrected	0.0880951	0	Non significant
SARS-CoV-2	901	913	YRFNGIGVTQNVL	12	Omicron - DELTA	10	-0.0256978	0.0112265	-0.096067	0.0598753	-0.200711	0.119751	-0.016726	0.00997922	Not corrected	0.106996	0	Non significant
SARS-CoV-2	904	913	NGIGVTQNVL	9	Omicron - DELTA	10	-0.0244493	0.00940816	-0.115221	0.0706546	-0.117465	0.0706546	-0.0130517	0.00785051	Not corrected	0.110774	0	Non significant
SARS-CoV-2	906	913	IGVTQNVL	7	Omicron - DELTA	10	-0.0220785	0.00779517	-0.160897	0.0333712	-0.17624	0.0333712	-0.0251772	0.00476732	Not corrected	0.0137279	0	Non significant
SARS-CoV-2	914	919	YENQKL	5	Omicron - DELTA	10	-0.0121082	0.0354054	0.092735	0.02295	0.186458	0.0459	0.0372916	0.00918	Not corrected	0.0182859	0	Non significant
SARS-CoV-2	920	924	IANQF	4	Omicron - DELTA	10	-0.00950067	0.00529662	0.0118308	0.0253817	0.00661627	0.0253817	0.00165407	0.00634541	Not corrected	0.804884	0	Non significant
SARS-CoV-2	920	935	IANQFNSAIGKIQDSL	15	Omicron - DELTA	10	-0.0322357	0.0139256	0.215495	0.0950636	0.451155	0.190127	0.030077	0.0126751	Not corrected	0.0550654	0	Non significant
SARS-CoV-2	925	935	NSAIGKIQDSL	10	Omicron - DELTA	10	-0.0215358	0.00917285	0.227794	0.100204	0.447496	0.200407	0.0447496	0.0200407	Not corrected	0.0577114	0	Non significant
SARS-CoV-2	928	935	IGKIQDSL	7	Omicron - DELTA	10	-0.0152833	0.00415824	0.24648	0.0526125	0.489673	0.105225	0.0699533	0.0150321	Not corrected	0.0151035	0	Non significant
SARS-CoV-2	990	998	IDRLITGRL	8	Omicron - DELTA	10	-0.0230812	0.00571285	-0.0361997	0.0401821	-0.0955082	0.0803642	-0.0119385	0.0100455	Not corrected	0.186194	0	Non significant
SARS-CoV-2	994	998	ITGRL	4	Omicron - DELTA	10	-0.0146598	0.0148195	-0.0614017	0.00577089	-0.0541296	0.00577089	-0.0135324	0.00144272	Not corrected	0.00468166	0	Non significant
SARS-CoV-2	999	1003	QSLQT	4	Omicron - DELTA	10	-0.00839667	0.0665779	-0.106044	0.00333462	-0.116922	0.00333462	-0.0292304	0.000833655	Not corrected	0.0113168	0	Non significant
SARS-CoV-2	1004	1009	YVTQQL	5	Omicron - DELTA	10	-0.0138528	0.00635218	-0.0855517	0.0277991	-0.0890041	0.0277991	-0.0178008	0.00555982	Not corrected	0.0923582	0	Non significant
SARS-CoV-2	1047	1059	MSFPQSAPHGVVF	10	Omicron - DELTA	10	-0.0291978	0.0101328	-0.0670435	0.0428164	-0.124735	0.0856327	-0.0124735	0.00856327	Not corrected	0.22384	0	Non significant
SARS-CoV-2	1087	1092	PREGVF	4	Omicron - DELTA	10	-0.0129325	0.0031951	0.144019	0.0523405	0.12931	0.0523405	0.0323276	0.0130851	Not corrected	0.0574065	0	Non significant
SARS-CoV-2	1100	1106	FVTQRNF	6	Omicron - DELTA	10	-0.0115397	0.00384804	-0.0333242	0.124826	-0.0333055	0.124826	-0.00555092	0.0208044	Not corrected	0.740897	0	Non significant
SARS-CoV-2	1100	1114	FVTQRNFYEPQIITT	13	Omicron - DELTA	10	-0.0221015	0.0100182	-0.198277	0.121923	-0.464536	0.243847	-0.0357335	0.0187574	Not corrected	0.22552	0	Non significant
SARS-CoV-2	1106	1114	FYEPQIITT	7	Omicron - DELTA	10	-0.026315	0.0114343	-0.179208	0.040064	-0.176361	0.040064	-0.0251944	0.00572344	Not corrected	0.00916378	0	Non significant
SARS-CoV-2	1243	1247	VLLST	4	Omicron - DELTA	10	-0.0187155	0.00702322	0.195308	0.0972447	0.177835	0.0972447	0.0444588	0.0243112	Not corrected	0.104979	0	Non significant
SARS-CoV-2	1243	1248	VLLSTF	5	Omicron - DELTA	10	-0.0318422	0.0111435	0.336271	0.0990182	0.335548	0.0990182	0.0671096	0.0198036	Not corrected	0.12746	0	Non significant
SARS-CoV-2	291	303	CALDPLSETKCTL	11	Omicron - DELTA	10	-0.0286112	0.0112367	-0.321835	0.0431917	-0.654132	0.0863834	-0.0594665	0.00785303	Not corrected	0.0088147	0	Protected
SARS-CoV-2	767	779	IAVEQDKNTQEVF	12	Omicron - DELTA	10	-0.019316	0.00596107	-0.167175	0.026161	-0.310491	0.0523219	-0.0258743	0.00436016	Not corrected	0.00354666	0	Protected
SARS-CoV-2	1015	1021	IRASANL	6	Omicron - DELTA	10	-0.0128035	0.0077274	-0.258814	0.0236934	-0.284561	0.0236934	-0.0474268	0.0039489	Not corrected	0.00051158	0	Protected
SARS-CoV-2	177	186	MDLEGKQGNF	9	Omicron - DELTA	10	-0.0116663	0.0053585	0.629888	0.0868168	1.22356	0.173634	0.135951	0.0192926	Not corrected	0.00377785	0	Deprotected
SARS-CoV-2	553	568	TESNKKFLPFQQFGRD	14	Omicron - DELTA	10	-0.0215675	0.00749255	0.203194	0.0203999	0.594888	0.0611996	0.042492	0.0043714	Not corrected	0.00195768	0	Deprotected
SARS-CoV-2	750	756	LLQYGSF	6	Omicron - DELTA	10	-0.0231632	0.0107607	0.618844	0.0475877	0.634892	0.0475877	0.105815	0.00793128	Not corrected	0.00185708	0	Deprotected
SARS-CoV-2	751	756	LQYGSF	5	Omicron - DELTA	10	-0.0157053	0.00805381	0.604849	0.0692913	0.605119	0.0692913	0.121024	0.0138583	Not corrected	0.00319766	0	Deprotected
SARS-CoV-2	968	974	GAISSVL	6	Omicron - DELTA	10	-0.0271928	0.00928366	0.549229	0.0907353	0.622482	0.0907353	0.103747	0.0151225	Not corrected	0.00843219	0	Deprotected
SARS-CoV-2	979	987	SRLDPPEAE	6	Omicron - DELTA	10	-0.0098115	0.0246263	0.135232	0.011625	0.232445	0.02325	0.0387409	0.003875	Not corrected	0.00378045	0	Deprotected
SARS-CoV-2	979	989	SRLDPPEAEVQ	8	Omicron - DELTA	10	-0.017212	0.00396775	0.357241	0.00806242	0.703267	0.0161248	0.0879083	0.00201561	Not corrected	0.00664419	0	Deprotected
SARS-CoV-2	988	993	VQIDRL	5	Omicron - DELTA	10	-0.0176907	0.00469133	0.761236	0.0617931	0.750944	0.0617931	0.150189	0.0123586	Not corrected	0.000647546	0	Deprotected
SARS-CoV-2	32	42	FTRGVYYPDKV	9	Omicron - DELTA	30	-0.016999	0.00452933	-0.147188	0.0268766	-0.287934	0.0537532	-0.0319927	0.00597258	Not corrected	0.056165	0	Non significant
SARS-CoV-2	32	43	FTRGVYYPDKVF	10	Omicron - DELTA	30	-0.025787	0.00638309	-0.0464795	0.0106461	-0.153109	0.0319382	-0.0153109	0.00319382	Not corrected	0.0372803	0	Non significant
SARS-CoV-2	32	48	FTRGVYYPDKVFRSSVL	15	Omicron - DELTA	30	-0.0283465	0.00798434	0.01019	0.0109121	0.0311789	0.0436483	0.0020786	0.00290989	Not corrected	0.508899	0	Non significant
SARS-CoV-2	49	55	HSTQDLF	6	Omicron - DELTA	30	-0.020752	0.00451727	-0.0089705	0.0562998	0.025036	0.0562998	0.00417267	0.0093833	Not corrected	0.69773	0	Non significant
SARS-CoV-2	49	56	HSTQDLFL	7	Omicron - DELTA	30	-0.0291815	0.00982694	0.0353575	0.0140628	0.0513751	0.0140628	0.0073393	0.00200897	Not corrected	0.140541	0	Non significant
SARS-CoV-2	85	91	PFNDGVY	5	Omicron - DELTA	30	-0.011764	0.00607737	-0.199089	0.160918	-0.173316	0.160918	-0.0346633	0.0321835	Not corrected	0.401406	0	Non significant
SARS-CoV-2	104	110	WIFGTTL	6	Omicron - DELTA	30	-0.0375715	0.0123627	-0.0975895	0.169961	-0.0935009	0.169961	-0.0155835	0.0283269	Not corrected	0.62126	0	Non significant
SARS-CoV-2	111	117	DSKTQSL	6	Omicron - DELTA	30	-0.026116	0.0721889	0.036588	0.0563517	-0.0129202	0.0563517	-0.00215337	0.00939195	Not corrected	0.817715	0	Non significant
SARS-CoV-2	177	186	MDLEGKQGNF	9	Omicron - DELTA	30	-0.013748	0.00574707	0.561395	0.0439152	1.08657	0.0878304	0.12073	0.00975894	Not corrected	0.0268079	0	Non significant
SARS-CoV-2	177	191	MDLEGKQGNFKNLRE	14	Omicron - DELTA	30	-0.01177	0.00454167	0.16729	0.0237214	0.472884	0.0711643	0.0337774	0.00508316	Not corrected	0.0397121	0	Non significant
SARS-CoV-2	180	191	EGKQGNFKNLRE	11	Omicron - DELTA	30	-0.022418	0	0.10631	0	0.189557	0	0.0172324	0	Not corrected	0	0	Non significant
SARS-CoV-2	192	199	FVFKNIDG	7	Omicron - DELTA	30	-0.0212805	0.0086037	0.060862	0.0337816	0.034849	0.0675632	0.00497842	0.00965188	Not corrected	0.644406	0	Non significant
SARS-CoV-2	192	200	FVFKNIDGY	8	Omicron - DELTA	30	-0.032417	0.0114007	0.052585	0.0210862	0.0697956	0.0421724	0.00872445	0.00527155	Not corrected	0.227092	0	Non significant
SARS-CoV-2	192	201	FVFKNIDGYF	9	Omicron - DELTA	30	-0.0311975	0.013396	0.004903	0.0258626	0.0523206	0.0517252	0.0058134	0.00574724	Not corrected	0.370325	0	Non significant
SARS-CoV-2	195	201	KNIDGYF	6	Omicron - DELTA	30	-0.020757	0.00801467	-0.0215235	0.157653	0.0950836	0.157653	0.0158473	0.0262755	Not corrected	0.563609	0	Non significant
SARS-CoV-2	243	264	ALHRSYLTPGDSSSGWTAGAAA	20	Omicron - DELTA	30	-0.0210435	0.00578129	0.543086	0.0257297	1.64982	0.0771891	0.082491	0.00385945	Not corrected	0.024832	0	Non significant
SARS-CoV-2	245	264	HRSYLTPGDSSSGWTAGAAA	18	Omicron - DELTA	30	-0.0185395	0.006925	0.567543	0.0953041	1.12076	0.190608	0.0622647	0.0105893	Not corrected	0.0891775	0	Non significant
SARS-CoV-2	265	276	YYVGYLQPRTFL	10	Omicron - DELTA	30	-0.0381065	0.0120029	0.0135	0.0172793	0.049668	0.0345585	0.0049668	0.00345585	Not corrected	0.239139	0	Non significant
SARS-CoV-2	266	276	YVGYLQPRTFL	9	Omicron - DELTA	30	-0.0369335	0.0124919	-0.023517	0.00790607	-0.0405249	0.0158121	-0.00450276	0.00175691	Not corrected	0.204086	0	Non significant
SARS-CoV-2	267	276	VGYLQPRTFL	8	Omicron - DELTA	30	-0.0336805	0.0135961	0.0355685	0.0477833	-0.0445085	0.0955667	-0.00556356	0.0119458	Not corrected	0.676082	0	Non significant
SARS-CoV-2	269	276	YLQPRTFL	6	Omicron - DELTA	30	-0.030261	0.00970591	0.0841045	0.0183338	0.102569	0.0366677	0.0170948	0.00611128	Not corrected	0.185081	0	Non significant
SARS-CoV-2	306	313	FTVEKGIY	7	Omicron - DELTA	30	-0.0186645	0.0067621	-0.002255	0.0226867	-0.0578706	0.0453734	-0.00826724	0.00648191	Not corrected	0.376542	0	Non significant
SARS-CoV-2	306	317	FTVEKGIYQTSN	11	Omicron - DELTA	30	-0.014731	0.00626955	0.119226	0.0342781	0.235146	0.0685561	0.0213769	0.00623237	Not corrected	0.0602974	0	Non significant
SARS-CoV-2	306	318	FTVEKGIYQTSNF	12	Omicron - DELTA	30	-0.024066	0.0100157	0.130577	0.0420808	0.250601	0.0841616	0.0208834	0.00701347	Not corrected	0.170299	0	Non significant
SARS-CoV-2	318	325	FRVQPTES	6	Omicron - DELTA	30	-0.0179905	0.0143203	0.277963	0.0738497	0.291258	0.0738497	0.048543	0.0123083	Not corrected	0.0485958	0	Non significant
SARS-CoV-2	388	392	NDLCF	4	Omicron - DELTA	30	-0.0242205	0.00957673	0.330492	0.0653011	0.333365	0.0653011	0.0833411	0.0163253	Not corrected	0.100808	0	Non significant
SARS-CoV-2	396	400	YADSF	4	Omicron - DELTA	30	-0.0038425	0.00608342	0.101583	0.0446035	0.123066	0.0446035	0.0307665	0.0111509	Not corrected	0.09916	0	Non significant
SARS-CoV-2	423	429	YKLPDDF	5	Omicron - DELTA	30	-0.02437	0.00740675	0.053167	0.00887487	0.0718368	0.0177497	0.0143674	0.00354995	Not corrected	0.0455477	0	Non significant
SARS-CoV-2	456	471	FRKSNLKPFERDISTE	14	Omicron - DELTA	30	-0.0140905	0.00463395	0.208483	0.0373494	0.650208	0.112048	0.0464435	0.00800343	Not corrected	0.0930221	0	Non significant
SARS-CoV-2	497	505	FQPTNGVGY	7	Omicron - DELTA	30	-0.031624	0.00904147	0.0653265	0.0146379	0.0640188	0.0146379	0.00914555	0.00209113	Not corrected	0.118913	0	Non significant
SARS-CoV-2	511	515	VVLSF	4	Omicron - DELTA	30	-0.032312	0.0105531	0.084121	0.0026033	0.0584129	0.0026033	0.0146032	0.000650824	Not corrected	0.00391361	0	Non significant
SARS-CoV-2	516	533	ELLHAPATVCGPKKSTNL	15	Omicron - DELTA	30	-0.0282055	0.00492783	-0.200676	0.254908	-0.624392	0.764724	-0.0416261	0.0509816	Not corrected	0.514997	0	Non significant
SARS-CoV-2	553	568	TESNKKFLPFQQFGRD	14	Omicron - DELTA	30	-0.02559	0.0096917	0.223568	0.0235312	0.656011	0.0705937	0.0468579	0.00504241	Not corrected	0.0420345	0	Non significant
SARS-CoV-2	569	574	IADTTD	5	Omicron - DELTA	30	0.0139455	0.00401388	0.120632	0.0381446	0.0873923	0.0381446	0.0174785	0.00762892	Not corrected	0.142367	0	Non significant
SARS-CoV-2	575	582	AVRDPQTL	6	Omicron - DELTA	30	-0.00985	0.0122959	-0.007943	0.0464628	0.0151371	0.0929257	0.00252285	0.0154876	Not corrected	0.881139	0	Non significant
SARS-CoV-2	575	583	AVRDPQTLE	7	Omicron - DELTA	30	-0.01454	0.0171498	-0.0052185	0.0400413	0.00857715	0.0800826	0.00122531	0.0114404	Not corrected	0.913409	0	Non significant
SARS-CoV-2	576	582	VRDPQTL	5	Omicron - DELTA	30	-0.020043	0.0188969	-0.003449	0.0507257	-0.0321909	0.0507257	-0.00643819	0.0101451	Not corrected	0.563286	0	Non significant
SARS-CoV-2	586	592	DITPCSF	5	Omicron - DELTA	30	-0.0233255	0.0100089	0.292885	0.167736	0.233499	0.167736	0.0466997	0.0335473	Not corrected	0.351562	0	Non significant
SARS-CoV-2	605	621	SNQVAVLYQGVNCTEVP	15	Omicron - DELTA	30	-0.0305015	0.00882121	-0.087756	0.0253619	-0.280371	0.0760856	-0.0186914	0.00507237	Not corrected	0.105792	0	Non significant
SARS-CoV-2	634	643	RVYSTGSNVF	9	Omicron - DELTA	30	-0.021725	0.00628974	0.386497	0.0807494	0.421437	0.0807494	0.0468263	0.00897215	Not corrected	0.0867187	0	Non significant
SARS-CoV-2	664	682	IPIGAGICASYQTQTNSPA	16	Omicron - DELTA	30	-0.029541	0.010173	-0.116325	0.0325985	-0.339321	0.0977954	-0.0212075	0.00611221	Not corrected	0.0657537	0	Non significant
SARS-CoV-2	688	692	SIIAY	4	Omicron - DELTA	30	-0.0226965	0.00646141	-0.284853	0.0628055	-0.296528	0.0628055	-0.0741319	0.0157014	Not corrected	0.0607982	0	Non significant
SARS-CoV-2	692	696	YTMSL	4	Omicron - DELTA	30	-0.025704	0.00808659	0.083318	0.0117616	0.0797308	0.0117616	0.0199327	0.00294039	Not corrected	0.0175152	0	Non significant
SARS-CoV-2	716	720	TISVT	4	Omicron - DELTA	30	-0.0156635	0.0129131	0.0259055	0.0110548	0.0151549	0.0110548	0.00378872	0.0027637	Not corrected	0.336865	0	Non significant
SARS-CoV-2	719	724	VTTEIL	5	Omicron - DELTA	30	-0.025852	0.00672034	0.0919475	0.0291216	0.0605901	0.0291216	0.012118	0.00582433	Not corrected	0.248229	0	Non significant
SARS-CoV-2	721	727	TEILPVS	5	Omicron - DELTA	30	-0.030542	0.00643261	0.056781	0.0229256	0.0648568	0.0229256	0.0129714	0.00458512	Not corrected	0.113311	0	Non significant
SARS-CoV-2	721	728	TEILPVSM	6	Omicron - DELTA	30	-0.0363085	0.0113507	0.0054405	0.0115632	-0.00670122	0.0115632	-0.00111687	0.00192721	Not corrected	0.603051	0	Non significant
SARS-CoV-2	750	756	LLQYGSF	6	Omicron - DELTA	30	-0.0264075	0.0105595	0.486633	0.0315912	0.502681	0.0315912	0.0837801	0.0052652	Not corrected	0.0156912	0	Non significant
SARS-CoV-2	767	779	IAVEQDKNTQEVF	12	Omicron - DELTA	30	-0.021166	0.00584598	-0.127816	0.0302474	-0.231775	0.0604949	-0.0193146	0.00504124	Not corrected	0.066117	0	Non significant
SARS-CoV-2	769	779	VEQDKNTQEVF	10	Omicron - DELTA	30	-0.018566	0.00464479	-0.0264565	0.0251502	-0.0796908	0.0503004	-0.00796908	0.00503004	Not corrected	0.227281	0	Non significant
SARS-CoV-2	818	825	LLFNKVTL	7	Omicron - DELTA	30	-0.037454	0.0112576	0.156565	0.0450191	0.383257	0.0900381	0.054751	0.0128626	Not corrected	0.126424	0	Non significant
SARS-CoV-2	819	825	LFNKVTL	6	Omicron - DELTA	30	-0.0323455	0.00871652	0.127036	0.00424062	0.289916	0.00848124	0.0483194	0.00141354	Not corrected	0.0127425	0	Non significant
SARS-CoV-2	820	830	FNKVTLADAGF	10	Omicron - DELTA	30	-0.0328855	0.0109999	0.154959	0.0466249	0.286663	0.0932498	0.0286663	0.00932498	Not corrected	0.169407	0	Non significant
SARS-CoV-2	826	830	ADAGF	4	Omicron - DELTA	30	-0.008285	0.00585654	0.183857	0.0386712	0.186375	0.0386712	0.0465936	0.0096678	Not corrected	0.0312038	0	Non significant
SARS-CoV-2	870	874	YTSAL	4	Omicron - DELTA	30	-0.012125	0.00537354	-0.238092	0.0473959	-0.241155	0.0473959	-0.0602886	0.011849	Not corrected	0.0420035	0	Non significant
SARS-CoV-2	899	903	MAYRF	4	Omicron - DELTA	30	-0.018515	0.0061772	-0.251971	0.0456863	-0.240189	0.0456863	-0.0600471	0.0114216	Not corrected	0.0600587	0	Non significant
SARS-CoV-2	900	910	AYRFNGIGVTQ	10	Omicron - DELTA	30	-0.0219585	0.00738319	0.0008025	0.0872214	-0.0182333	0.174443	-0.00182333	0.0174443	Not corrected	0.918496	0	Non significant
SARS-CoV-2	900	913	AYRFNGIGVTQNVL	13	Omicron - DELTA	30	-0.0316085	0.0111525	-0.149928	0.0246947	-0.320366	0.0493894	-0.0246436	0.00379919	Not corrected	0.0178065	0	Non significant
SARS-CoV-2	901	913	YRFNGIGVTQNVL	12	Omicron - DELTA	30	-0.0304425	0.0110561	-0.176648	0.031217	-0.361873	0.062434	-0.0301561	0.00520284	Not corrected	0.0633053	0	Non significant
SARS-CoV-2	904	913	NGIGVTQNVL	9	Omicron - DELTA	30	-0.027531	0.00854853	-0.233	0.0521596	-0.235244	0.0521596	-0.0261382	0.00579552	Not corrected	0.0467134	0	Non significant
SARS-CoV-2	906	913	IGVTQNVL	7	Omicron - DELTA	30	-0.0245035	0.00751931	-0.184133	0.0105987	-0.199477	0.0105987	-0.0284967	0.0015141	Not corrected	0.012759	0	Non significant
SARS-CoV-2	914	919	YENQKL	5	Omicron - DELTA	30	-0.0230405	0.0430542	0.054632	0.0149583	0.110252	0.0299166	0.0220504	0.00598331	Not corrected	0.0791305	0	Non significant
SARS-CoV-2	920	924	IANQF	4	Omicron - DELTA	30	-0.012559	0.0063151	0.000227	0.0496061	-0.00498757	0.0496061	-0.00124689	0.0124015	Not corrected	0.919197	0	Non significant
SARS-CoV-2	920	935	IANQFNSAIGKIQDSL	15	Omicron - DELTA	30	-0.0342815	0.01362	0.048419	0.0770109	0.117003	0.154022	0.00780023	0.0102681	Not corrected	0.522679	0	Non significant
SARS-CoV-2	925	935	NSAIGKIQDSL	10	Omicron - DELTA	30	-0.024142	0.00763459	0.075696	0.0160416	0.143301	0.0320833	0.0143301	0.00320833	Not corrected	0.0678241	0	Non significant
SARS-CoV-2	928	935	IGKIQDSL	7	Omicron - DELTA	30	-0.0202655	0.00729341	0.0665665	0.126617	0.129845	0.253235	0.0185494	0.0361764	Not corrected	0.643396	0	Non significant
SARS-CoV-2	968	974	GAISSVL	6	Omicron - DELTA	30	-0.0291495	0.00859723	0.197597	0.054982	0.27085	0.054982	0.0451416	0.00916367	Not corrected	0.08328	0	Non significant
SARS-CoV-2	979	987	SRLDPPEAE	6	Omicron - DELTA	30	-0.017041	0.034676	0.0259985	0.0256952	0.0139785	0.0513904	0.00232975	0.00856507	Not corrected	0.792729	0	Non significant
SARS-CoV-2	979	989	SRLDPPEAEVQ	8	Omicron - DELTA	30	-0.019902	0.00550341	0.179123	0.0231982	0.34703	0.0463964	0.0433788	0.00579955	Not corrected	0.0582824	0	Non significant
SARS-CoV-2	990	998	IDRLITGRL	8	Omicron - DELTA	30	-0.0319145	0.00421272	0.179204	0.0502142	0.3353	0.100428	0.0419125	0.0125536	Not corrected	0.11952	0	Non significant
SARS-CoV-2	994	998	ITGRL	4	Omicron - DELTA	30	-0.033735	0.0295204	0.074212	0.026722	0.0814841	0.026722	0.020371	0.0066805	Not corrected	0.0822383	0	Non significant
SARS-CoV-2	999	1003	QSLQT	4	Omicron - DELTA	30	-0.027895	0.0837415	-0.14364	0.0325135	-0.154518	0.0325135	-0.0386295	0.00812838	Not corrected	0.0890075	0	Non significant
SARS-CoV-2	1004	1009	YVTQQL	5	Omicron - DELTA	30	-0.016935	0.0054183	-0.123264	0.0221147	-0.126716	0.0221147	-0.0253432	0.00442293	Not corrected	0.0439906	0	Non significant
SARS-CoV-2	1013	1017	AEIRA	4	Omicron - DELTA	30	-0.029378	0	-0.217922	0	-0.202396	0	-0.0505991	0	Not corrected	0	0	Non significant
SARS-CoV-2	1015	1021	IRASANL	6	Omicron - DELTA	30	-0.0196985	0.0122436	-0.271213	0.025241	-0.29696	0.025241	-0.0494934	0.00420683	Not corrected	0.0165359	0	Non significant
SARS-CoV-2	1047	1059	MSFPQSAPHGVVF	10	Omicron - DELTA	30	-0.0338075	0.0122813	-0.045387	0.0218826	-0.0814223	0.0437652	-0.00814223	0.00437652	Not corrected	0.165977	0	Non significant
SARS-CoV-2	1087	1092	PREGVF	4	Omicron - DELTA	30	-0.0186555	0.00459676	0.051426	0.0176502	0.0367172	0.0176502	0.00917931	0.00441254	Not corrected	0.187803	0	Non significant
SARS-CoV-2	1100	1106	FVTQRNF	6	Omicron - DELTA	30	-0.0118085	0.00784546	-0.184543	0.402655	-0.184524	0.402655	-0.0307541	0.0671092	Not corrected	0.688458	0	Non significant
SARS-CoV-2	1100	1114	FVTQRNFYEPQIITT	13	Omicron - DELTA	30	-0.0312955	0.00942534	-0.213309	0.0712424	-0.4946	0.142485	-0.0380462	0.0109604	Not corrected	0.152394	0	Non significant
SARS-CoV-2	1106	1114	FYEPQIITT	7	Omicron - DELTA	30	-0.0277365	0.0111734	-0.041631	0.0203022	-0.0387837	0.0203022	-0.00554053	0.00290032	Not corrected	0.167308	0	Non significant
SARS-CoV-2	1243	1247	VLLST	4	Omicron - DELTA	30	-0.0199505	0.00647803	0.163397	0.0365478	0.145924	0.0365478	0.0364811	0.00913694	Not corrected	0.0456559	0	Non significant
SARS-CoV-2	1243	1248	VLLSTF	5	Omicron - DELTA	30	-0.0356105	0.0105548	0.272725	0.0584093	0.272003	0.0584093	0.0544005	0.0116819	Not corrected	0.0956272	0	Non significant
SARS-CoV-2	291	303	CALDPLSETKCTL	11	Omicron - DELTA	30	-0.032474	0.0118803	-0.437951	0.0360384	-0.886365	0.0720769	-0.0805786	0.00655244	Not corrected	0.00958563	0	Protected
SARS-CoV-2	867	874	IAQYTSAL	7	Omicron - DELTA	30	-0.019061	0.00638225	-0.26333	0.0154626	-0.261197	0.0154626	-0.0373138	0.00220894	Not corrected	0.00340872	0	Protected
SARS-CoV-2	899	913	MAYRFNGIGVTQNVL	14	Omicron - DELTA	30	-0.0315325	0.0122911	-0.243774	0.014637	-0.415614	0.029274	-0.0296867	0.002091	Not corrected	0.00937115	0	Protected
SARS-CoV-2	245	265	HRSYLTPGDSSSGWTAGAAAY	19	Omicron - DELTA	30	-0.018446	0.00790734	0.509218	0.0169623	1.6761	0.0508868	0.0882158	0.00267825	Not corrected	0.000729276	0	Deprotected
SARS-CoV-2	314	318	QTSNF	4	Omicron - DELTA	30	-0.00361	0.00907113	0.24643	0.0110626	0.231396	0.0110626	0.057849	0.00276566	Not corrected	0.00219061	0	Deprotected
SARS-CoV-2	456	467	FRKSNLKPFERD	10	Omicron - DELTA	30	-0.0202085	0.0114554	0.23428	0.00470501	0.467222	0.00941003	0.0467222	0.000941003	Not corrected	0.00571974	0	Deprotected
SARS-CoV-2	627	633	DQLTPTW	5	Omicron - DELTA	30	-0.021505	0.0105293	0.264042	0.00417975	0.248448	0.00417975	0.0496896	0.000835949	Not corrected	0.000271786	0	Deprotected
SARS-CoV-2	751	756	LQYGSF	5	Omicron - DELTA	30	-0.019072	0.00851866	0.476522	0.0367112	0.476793	0.0367112	0.0953586	0.00734223	Not corrected	0.0050932	0	Deprotected
SARS-CoV-2	988	993	VQIDRL	5	Omicron - DELTA	30	-0.0227	0.00524688	0.834587	0.0190994	0.824296	0.0190994	0.164859	0.00381989	Not corrected	0.000661984	0	Deprotected
