# Supplementary material for: Timeline of changes in spike conformational dynamics in emergent SARS-CoV-2 variants reveal progressive stabilization of trimer stalk with altered NTD dynamics
Source: eLife journal article supplement (doi:10.7554/elife.82584), 2023-03-14
Supplement: supp [file elife_poa_e82584_Transparent_Reporting_File.pdf › elife_poa_e82584_Transparent_Reporting_File.pdf]

# Certificates of Analysis

## Expi293F™ Cells

Product No. A14527

Lot No. 2523233

Date of Manufacture 19-Jul-2022

---

### Viability

Specification: Cells must demonstrate that they can be recovered as healthy logarithmically growing cells within 4 to 7 days after thawing. Viability is measured and must be  $\geq 90\%$ .

Result: Meets Specification

### Mycoplasma qPCR Assay

Specification: Negative for Mycoplasma

Result: Meets Specification

### Sterility Testing

Specification: Negative

Result: Meets Specification

---

For Research Use Only. Not for use in diagnostic procedures.

Thermo Fisher Scientific  
Life Sciences Solutions  
5781 Van Allen Way  
Carlsbad, CA, USA 92008  
(<https://www.thermofisher.com>)  
For inquiries, contact us at ([cofarequests@thermofisher.com](mailto:cofarequests@thermofisher.com))



Chevohn Joseph  
Director, Quality  
Issued on 06-Sep-2022
